# Supplementary material for: Epigenetic profiling of human brain differential DNA methylation networks in schizophrenia
Source: BMC Med Genomics. 2016 Dec 5;9(Suppl 3):68. doi: 10.1186/s12920-016-0229-y (PMC5260790; doi:10.1186/s12920-016-0229-y)
Supplement: Additional file 1: — Differentially methylated genes with differential expression databases. (XLSX 170 kb) [file 12920_2016_229_MOESM1_ESM.xlsx]

## Sheet: methylation_over_under
Methylation gene name	Refseq	NearestGeneDist	Region	Gene ID	Differential expression databases
SP5	NM_001003845	4	promoter	389058	Huang_2013_under-expression
NAT8L	NM_178557	305	promoter	339983	Wu_2012_under-expression
NPAS4	NM_178864	11867	upstream	266743	Wu_2012_under-expression
CDC20B	NM_001145734	-527	promoter	166979	Huang_2013_under-expression
RC3H1	NM_001300850	-28924	upstream	149041	Huang_2013_over-expression
MDH1B	NM_001039845	-23	promoter	130752	Huang_2014_under-expression
STRADA	NM_001003786	-508	promoter	92335	Huang_2014_under-expression
STRADA	NM_001003786	-190	promoter	92335	Huang_2014_under-expression
CNDP1	NM_032649	-12757	downstream	84735	Wu_2012_under-expression
ASB13	NM_024701	-173	promoter	79754	Wu_2012_under-expression
C8orf33	NM_023080	398	promoter	65265	Huang_2014_under-expression
KLC2	NM_001134774	-317	downstream	64837	Wu_2012_under-expression
THADA	NM_001083953	-96	promoter	63892	Huang_2013_under-expression
ATP5SL	NM_001167867	-118	promoter	55101	Huang_2014_under-expression
DLL4	NM_019074	43	promoter	54567	Huang_2013_over-expression
DDIT4	NM_019058	63	promoter	54541	Wu_2012_over-expression
CD320	NM_001165895	-248	promoter	51293	Wu_2012_under-expression
PSMC3IP	NM_001256014	-248	promoter	29893	Wu_2012_over-expression
INVS	NM_014425	11	promoter	27130	Huang_2014_over-expression
SERBP1	NM_001018067	-71	promoter	26135	Huang_2014_over-expression
ABHD12	NM_001042472	-101	promoter	26090	Huang_2014_under-expression;Wu_2012_under-expression
TMEM59L	NM_012109	726	promoter	25789	Wu_2012_under-expression
SEC61G	NM_001012456	87462	downstream	23480	Wu_2012_under-expression
INPP5F	NM_001243194	615	promoter	22876	Wu_2012_under-expression
STIP1	NM_001282652	696	promoter	10963	Wu_2012_over-expression
BLCAP	NM_001167820	-438	promoter	10904	Huang_2014_over-expression
PMVK	NM_006556	-179	promoter	10654	Wu_2012_over-expression
CORO2B	NM_001190456	833	promoter	10391	Huang_2014_under-expression
HMG20B	NM_006339	427	promoter	10362	Wu_2012_under-expression
EIF1B	NM_005875	285	promoter	10289	Wu_2012_under-expression
MAFB	NM_005461	-1108	promoter	9935	Huang_2013_under-expression
GPRIN2	NM_014696	-7748	downstream	9721	Huang_2014_under-expression
FOXH1	NM_003923	-1331	promoter	8928	Wu_2012_over-expression
REEP5	NM_005669	-100	promoter	7905	Wu_2012_under-expression
SYK	NM_001135052	234	promoter	6850	Huang_2013_over-expression
FSCN1	NM_003088	30517	upstream	6624	Wu_2012_under-expression
VPS52	NM_001289174	1781	downstream	6293	Huang_2014_under-expression
RPLP0	NM_001002	-37	promoter	6175	Wu_2012_under-expression
RPL37A	NM_000998	128	promoter	6168	Wu_2012_over-expression
RPL27	NM_000988	135	promoter	6155	Wu_2012_under-expression
QARS	NM_001272073	-19	promoter	5859	Huang_2014_under-expression
PURA	NM_005859	96	promoter	5813	Huang_2013_under-expression
PDE3A	NM_000921	195	promoter	5139	Wu_2012_over-expression
NEFL	NM_006158	-43184	upstream	4747	Wu_2012_under-expression
MEF2C	NM_001131005	57175	downstream	4208	Huang_2014_over-expression
KCND3	NM_004980	-61	promoter	3752	Huang_2013_under-expression
FUS	NM_001010850	556	promoter	2521	Wu_2012_over-expression
FOS	NM_005252	19732	upstream	2353	Wu_2012_under-expression
DUSP5	NM_004419	-18700	downstream	1847	Wu_2012_under-expression
CSNK1G2	NM_001319	567	promoter	1455	Huang_2013_under-expression
CLU	NM_001831	-67	promoter	1191	Wu_2012_over-expression
ATF3	NM_001030287	6220	upstream	467	Huang_2014_under-expression;Huang_2013_under-expression
AGL	NM_000028	219	promoter	178	Huang_2014_under-expression
ZNF616	NM_178523	0	inside exon	90317	Huang_2013_under-expression
ZEB2	NM_001171653	0	inside intron	9839	Wu_2012_over-expression
UGP2	NM_001001521	0	inside exon	7360	Wu_2012_under-expression
TSPAN10	NM_001290212	0	inside exon	83882	Wu_2012_over-expression
TRIM37	NM_001005207	0	inside intron	4591	Wu_2012_under-expression
TOMM20L	NM_207377	0	inside intron	387990	Wu_2012_over-expression
THTPA	NM_001126339	0	inside intron	79178	Wu_2012_under-expression
THRA	NM_001190918	0	inside intron	7067	Wu_2012_over-expression
TCTE3	NM_174910	0	inside exon	6991	Wu_2012_over-expression
TCOF1	NM_000356	0	inside intron	6949	Huang_2014_under-expression
SYT2	NM_001136504	0	inside intron	127833	Wu_2012_under-expression
STRADA	NM_001003786	0	inside intron	92335	Huang_2014_under-expression
SSFA2	NM_001130445	0	inside intron	6744	Huang_2014_over-expression
SLC30A6	NM_001193513	0	inside intron	55676	Huang_2013_under-expression
SEMA7A	NM_001146029	0	inside intron	8482	Wu_2012_under-expression
SEC14L1	NM_001039573	0	inside intron	6397	Huang_2014_under-expression
SCN1B	NM_001037	0	inside intron	6324	Wu_2012_under-expression
RPS5	NM_001009	0	inside intron	6193	Wu_2012_under-expression
RPS16	NM_001020	0	inside exon	6217	Wu_2012_over-expression
RBFOX3	NM_001025448	0	inside intron	146713	Wu_2012_under-expression
RALGDS	NM_001042368	0	inside intron	5900	Huang_2014_over-expression
PRNP	NM_000311	0	inside intron	5621	Huang_2014_over-expression
PRKG1	NM_001098512	0	inside intron	5592	Wu_2012_under-expression
PRKG1	NM_001098512	0	inside exon	5592	Wu_2012_under-expression
PRDX2	NM_005809	0	inside intron	7001	Wu_2012_under-expression
PPT1	NM_000310	0	inside intron	5538	Wu_2012_under-expression
PLAC8	NM_001130715	0	inside intron	51316	Huang_2013_under-expression
PFDN6	NM_001185181	0	inside intron	10471	Wu_2012_over-expression
PFDN6	NM_001185181	0	inside intron	10471	Wu_2012_over-expression
PFDN6	NM_001185181	0	inside exon	10471	Wu_2012_over-expression
PFDN2	NM_012394	0	inside intron	5202	Wu_2012_over-expression
PEX5	NM_000319	0	inside intron	5830	Huang_2014_under-expression
NUB1	NM_001243351	0	inside intron	51667	Huang_2014_under-expression
NGEF	NM_001114090	0	inside intron	25791	Wu_2012_under-expression
NEFL	NM_006158	0	inside exon	4747	Wu_2012_under-expression
NDRG3	NM_022477	0	inside intron	57446	Wu_2012_under-expression
NDRG2	NM_001282211	0	inside intron	57447	Wu_2012_over-expression
NCKIPSD	NM_016453	0	inside intron	51517	Wu_2012_under-expression
MTFR1	NM_001145838	0	inside intron	9650	Huang_2014_under-expression
MMAB	NM_052845	0	inside exon	326625	Huang_2013_under-expression
MIS12	NM_001258217	0	inside exon	79003	Huang_2014_under-expression
MEF2C	NM_001131005	0	inside intron	4208	Huang_2014_over-expression
MDH1	NM_001199111	0	inside exon	4190	Wu_2012_under-expression
MBP	NM_001025081	0	inside intron	4155	Wu_2012_over-expression
MAP1LC3B	NM_022818	0	inside exon	81631	Wu_2012_under-expression
LRRC16A	NM_001173977	0	inside exon	55604	Huang_2013_under-expression
LNP1	NM_001085451	0	inside exon	348801	Wu_2012_under-expression
KLHDC8B	NM_173546	0	inside intron	200942	Wu_2012_over-expression
KDM3A	NM_001146688	0	inside intron	55818	Huang_2013_over-expression
KATNAL1	NM_001014380	0	inside intron	84056	Huang_2014_over-expression
JUNB	NM_002229	0	inside exon	3726	Wu_2012_under-expression
JMJD6	NM_001081461	0	inside intron	23210	Wu_2012_over-expression
IFNAR1	NM_000629	0	inside intron	3454	Huang_2013_under-expression
HSP90AB1	NM_001271969	0	inside intron	3326	Wu_2012_over-expression
HARS2	NM_001278731	0	inside intron	23438	Huang_2014_over-expression
GZF1	NM_022482	0	inside intron	64412	Wu_2012_under-expression
FBXL19	NM_001099784	0	inside intron	54620	Huang_2014_under-expression
FAU	NM_001997	0	inside intron	2197	Wu_2012_over-expression
EFTUD2	NM_001142605	0	inside intron	9343	Huang_2014_under-expression
DYNLRB1	NM_001281727	0	inside intron	83658	Wu_2012_over-expression
DERL3	NM_001002862	0	inside exon	91319	Wu_2012_over-expression
COX10	NM_001303	0	inside intron	1352	Huang_2014_under-expression
CKS2	NM_001827	0	inside intron	1164	Wu_2012_under-expression
CKS2	NM_001827	0	inside exon	1164	Wu_2012_under-expression
CHRM2	NM_000739	0	inside intron	1129	Huang_2013_over-expression
CHRM2	NM_000739	0	inside intron	1129	Huang_2013_over-expression
CDK12	NM_015083	0	inside exon	51755	Huang_2014_under-expression
CALU	NM_001130674	0	inside intron	813	Huang_2014_under-expression
CACYBP	NM_001007214	0	inside intron	27101	Wu_2012_over-expression
BMP4	NM_001202	0	inside intron	652	Huang_2014_under-expression
ATP5B	NM_001686	0	inside exon	506	Wu_2012_under-expression
AQP10	NM_080429	0	inside exon	89872	Huang_2013_under-expression
APOM	NM_001256169	0	inside intron	55937	Wu_2012_under-expression
APOM	NM_001256169	0	inside intron	55937	Wu_2012_under-expression
ALOXE3	NM_001165960	0	inside intron	59344	Huang_2014_under-expression
ALDOA	NM_000034	0	inside exon	226	Wu_2012_under-expression
AKAP12	NM_005100	0	inside intron	9590	Huang_2013_under-expression
AK4	NM_001005353	0	inside intron	205	Huang_2014_over-expression
ACTA2	NM_001141945	0	inside exon	59	Wu_2012_over-expression
ACAP2	NM_012287	0	inside exon	23527	Huang_2013_under-expression

## Sheet: SDMGs
Methylation gene name	Refseq	Nearest gene dist.	Region	Gene ID	Differential expression databases
GPRIN2	NM_014696	-7748	downstream	9721	Huang_2014_under-expression
STRADA	NM_001003786	-190	promoter	92335	Huang_2014_under-expression
MIS12	NM_001258217	0	inside exon	79003	Huang_2014_under-expression
AGL	NM_000028	219	promoter	178	Huang_2014_under-expression
CORO2B	NM_001190456	833	promoter	10391	Huang_2014_under-expression
MDH1B	NM_001039845	-23	promoter	130752	Huang_2014_under-expression
STRADA	NM_001003786	0	inside intron	92335	Huang_2014_under-expression
COX10	NM_001303	0	inside intron	1352	Huang_2014_under-expression
BMP4	NM_001202	0	inside intron	652	Huang_2014_under-expression
C8orf33	NM_023080	398	promoter	65265	Huang_2014_under-expression
FBXL19	NM_001099784	0	inside intron	54620	Huang_2014_under-expression
NUB1	NM_001243351	0	inside intron	51667	Huang_2014_under-expression
ATP5SL	NM_001167867	-118	promoter	55101	Huang_2014_under-expression
CDK12	NM_015083	0	inside exon	51755	Huang_2014_under-expression
TCOF1	NM_000356	0	inside intron	6949	Huang_2014_under-expression
SEC14L1	NM_001039573	0	inside intron	6397	Huang_2014_under-expression
MTFR1	NM_001145838	0	inside intron	9650	Huang_2014_under-expression
ALOXE3	NM_001165960	0	inside intron	59344	Huang_2014_under-expression
EFTUD2	NM_001142605	0	inside intron	9343	Huang_2014_under-expression
STRADA	NM_001003786	-508	promoter	92335	Huang_2014_under-expression
PEX5	NM_000319	0	inside intron	5830	Huang_2014_under-expression
QARS	NM_001272073	-19	promoter	5859	Huang_2014_under-expression
VPS52	NM_001289174	1781	downstream	6293	Huang_2014_under-expression
CALU	NM_001130674	0	inside intron	813	Huang_2014_under-expression
ATF3	NM_001030287	6220	upstream	467	Huang_2014_under-expression;Huang_2013_under-expression
ABHD12	NM_001042472	-101	promoter	26090	Huang_2014_under-expression;Wu_2012_under-expression
INVS	NM_014425	11	promoter	27130	Huang_2014_over-expression
PRNP	NM_000311	0	inside intron	5621	Huang_2014_over-expression
SERBP1	NM_001018067	-71	promoter	26135	Huang_2014_over-expression
SSFA2	NM_001130445	0	inside intron	6744	Huang_2014_over-expression
RALGDS	NM_001042368	0	inside intron	5900	Huang_2014_over-expression
MEF2C	NM_001131005	57175	downstream	4208	Huang_2014_over-expression
MEF2C	NM_001131005	0	inside intron	4208	Huang_2014_over-expression
AK4	NM_001005353	0	inside intron	205	Huang_2014_over-expression
HARS2	NM_001278731	0	inside intron	23438	Huang_2014_over-expression
KATNAL1	NM_001014380	0	inside intron	84056	Huang_2014_over-expression
BLCAP	NM_001167820	-438	promoter	10904	Huang_2014_over-expression
PLAC8	NM_001130715	0	inside intron	51316	Huang_2013_under-expression
AKAP12	NM_005100	0	inside intron	9590	Huang_2013_under-expression
IFNAR1	NM_000629	0	inside intron	3454	Huang_2013_under-expression
CDC20B	NM_001145734	-527	promoter	166979	Huang_2013_under-expression
PURA	NM_005859	96	promoter	5813	Huang_2013_under-expression
MAFB	NM_005461	-1108	promoter	9935	Huang_2013_under-expression
SLC30A6	NM_001193513	0	inside intron	55676	Huang_2013_under-expression
THADA	NM_001083953	-96	promoter	63892	Huang_2013_under-expression
AQP10	NM_080429	0	inside exon	89872	Huang_2013_under-expression
ZNF616	NM_178523	0	inside exon	90317	Huang_2013_under-expression
CSNK1G2	NM_001319	567	promoter	1455	Huang_2013_under-expression
ACAP2	NM_012287	0	inside exon	23527	Huang_2013_under-expression
KCND3	NM_004980	-61	promoter	3752	Huang_2013_under-expression
LRRC16A	NM_001173977	0	inside exon	55604	Huang_2013_under-expression
MMAB	NM_052845	0	inside exon	326625	Huang_2013_under-expression
SP5	NM_001003845	4	promoter	389058	Huang_2013_under-expression
CHRM2	NM_000739	0	inside intron	1129	Huang_2013_over-expression
RC3H1	NM_001300850	-28924	upstream	149041	Huang_2013_over-expression
DLL4	NM_019074	43	promoter	54567	Huang_2013_over-expression
SYK	NM_001135052	234	promoter	6850	Huang_2013_over-expression
KDM3A	NM_001146688	0	inside intron	55818	Huang_2013_over-expression
CHRM2	NM_000739	0	inside intron	1129	Huang_2013_over-expression
SEC61G	NM_001012456	87462	downstream	23480	Wu_2012_under-expression
CNDP1	NM_032649	-12757	downstream	84735	Wu_2012_under-expression
NEFL	NM_006158	0	inside exon	4747	Wu_2012_under-expression
SEMA7A	NM_001146029	0	inside intron	8482	Wu_2012_under-expression
RBFOX3	NM_001025448	0	inside intron	146713	Wu_2012_under-expression
LNP1	NM_001085451	0	inside exon	348801	Wu_2012_under-expression
DUSP5	NM_004419	-18700	downstream	1847	Wu_2012_under-expression
ATP5B	NM_001686	0	inside exon	506	Wu_2012_under-expression
HMG20B	NM_006339	427	promoter	10362	Wu_2012_under-expression
EIF1B	NM_005875	285	promoter	10289	Wu_2012_under-expression
THTPA	NM_001126339	0	inside intron	79178	Wu_2012_under-expression
REEP5	NM_005669	-100	promoter	7905	Wu_2012_under-expression
PRDX2	NM_005809	0	inside intron	7001	Wu_2012_under-expression
KLC2	NM_001134774	-317	downstream	64837	Wu_2012_under-expression
RPS5	NM_001009	0	inside intron	6193	Wu_2012_under-expression
RPL27	NM_000988	135	promoter	6155	Wu_2012_under-expression
NDRG3	NM_022477	0	inside intron	57446	Wu_2012_under-expression
FOS	NM_005252	19732	upstream	2353	Wu_2012_under-expression
CD320	NM_001165895	-248	promoter	51293	Wu_2012_under-expression
NAT8L	NM_178557	305	promoter	339983	Wu_2012_under-expression
PRKG1	NM_001098512	0	inside intron	5592	Wu_2012_under-expression
APOM	NM_001256169	0	inside intron	55937	Wu_2012_under-expression
SYT2	NM_001136504	0	inside intron	127833	Wu_2012_under-expression
TRIM37	NM_001005207	0	inside intron	4591	Wu_2012_under-expression
PRKG1	NM_001098512	0	inside exon	5592	Wu_2012_under-expression
MDH1	NM_001199111	0	inside exon	4190	Wu_2012_under-expression
UGP2	NM_001001521	0	inside exon	7360	Wu_2012_under-expression
TMEM59L	NM_012109	726	promoter	25789	Wu_2012_under-expression
NGEF	NM_001114090	0	inside intron	25791	Wu_2012_under-expression
NPAS4	NM_178864	11867	upstream	266743	Wu_2012_under-expression
MAP1LC3B	NM_022818	0	inside exon	81631	Wu_2012_under-expression
ALDOA	NM_000034	0	inside exon	226	Wu_2012_under-expression
CKS2	NM_001827	0	inside intron	1164	Wu_2012_under-expression
JUNB	NM_002229	0	inside exon	3726	Wu_2012_under-expression
INPP5F	NM_001243194	615	promoter	22876	Wu_2012_under-expression
GZF1	NM_022482	0	inside intron	64412	Wu_2012_under-expression
PPT1	NM_000310	0	inside intron	5538	Wu_2012_under-expression
RPLP0	NM_001002	-37	promoter	6175	Wu_2012_under-expression
CKS2	NM_001827	0	inside exon	1164	Wu_2012_under-expression
ASB13	NM_024701	-173	promoter	79754	Wu_2012_under-expression
SCN1B	NM_001037	0	inside intron	6324	Wu_2012_under-expression
NEFL	NM_006158	-43184	upstream	4747	Wu_2012_under-expression
FSCN1	NM_003088	30517	upstream	6624	Wu_2012_under-expression
APOM	NM_001256169	0	inside intron	55937	Wu_2012_under-expression
NCKIPSD	NM_016453	0	inside intron	51517	Wu_2012_under-expression
CLU	NM_001831	-67	promoter	1191	Wu_2012_over-expression
STIP1	NM_001282652	696	promoter	10963	Wu_2012_over-expression
ZEB2	NM_001171653	0	inside intron	9839	Wu_2012_over-expression
DYNLRB1	NM_001281727	0	inside intron	83658	Wu_2012_over-expression
JMJD6	NM_001081461	0	inside intron	23210	Wu_2012_over-expression
TCTE3	NM_174910	0	inside exon	6991	Wu_2012_over-expression
ACTA2	NM_001141945	0	inside exon	59	Wu_2012_over-expression
PFDN2	NM_012394	0	inside intron	5202	Wu_2012_over-expression
DDIT4	NM_019058	63	promoter	54541	Wu_2012_over-expression
FOXH1	NM_003923	-1331	promoter	8928	Wu_2012_over-expression
FAU	NM_001997	0	inside intron	2197	Wu_2012_over-expression
TOMM20L	NM_207377	0	inside intron	387990	Wu_2012_over-expression
CACYBP	NM_001007214	0	inside intron	27101	Wu_2012_over-expression
NDRG2	NM_001282211	0	inside intron	57447	Wu_2012_over-expression
FUS	NM_001010850	556	promoter	2521	Wu_2012_over-expression
PFDN6	NM_001185181	0	inside exon	10471	Wu_2012_over-expression
PFDN6	NM_001185181	0	inside intron	10471	Wu_2012_over-expression
RPS16	NM_001020	0	inside exon	6217	Wu_2012_over-expression
RPL37A	NM_000998	128	promoter	6168	Wu_2012_over-expression
KLHDC8B	NM_173546	0	inside intron	200942	Wu_2012_over-expression
DERL3	NM_001002862	0	inside exon	91319	Wu_2012_over-expression
PFDN6	NM_001185181	0	inside intron	10471	Wu_2012_over-expression
THRA	NM_001190918	0	inside intron	7067	Wu_2012_over-expression
PDE3A	NM_000921	195	promoter	5139	Wu_2012_over-expression
MBP	NM_001025081	0	inside intron	4155	Wu_2012_over-expression
PSMC3IP	NM_001256014	-248	promoter	29893	Wu_2012_over-expression
TSPAN10	NM_001290212	0	inside exon	83882	Wu_2012_over-expression
PMVK	NM_006556	-179	promoter	10654	Wu_2012_over-expression
HSP90AB1	NM_001271969	0	inside intron	3326	Wu_2012_over-expression
CD164	NM_001142401	-69	promoter	8763
COPZ2	NM_016429	652	downstream	51226
SUGT1	NM_001130912	143	promoter	10910
HAT1	NM_001033085	0	inside intron	8520
TYW1B	NM_001145440	-1234	promoter	441250
SPICE1	NM_144718	0	inside exon	152185
KDELC2	NM_153705	0	inside intron	143888
MRPS18B	NM_014046	141	promoter	28973
RMDN1	NM_001286707	0	inside exon	51115
LPAR2	NM_004720	0	inside exon	9170
VIPAS39	NM_001193314	-160	promoter	63894
CRTAP	NM_006371	120	promoter	10491
ANKRD13C	NM_030816	0	inside exon	81573
GPRC5A	NM_003979	0	inside exon	9052
YIPF5	NM_001024947	-25	promoter	81555
MYCBPAP	NM_032133	105	promoter	84073
PTRH1	NM_001002913	0	inside exon	138428
TXNDC9	NM_005783	0	inside intron	10190
RALA	NM_005402	-25504	downstream	5898
SKOR1	NM_001031807	0	inside exon	390598
RNF123	NM_022064	28	promoter	63891
FADD	NM_003824	153	promoter	8772
JAK1	NM_002227	0	inside intron	3716
TCF7	NM_001134851	385	promoter	6932
LOC100129917	NR_036511	-64	promoter	100129917
RRAGC	NM_001271851	0	inside intron	64121
C6orf226	NM_001008739	-162	promoter	441150
HILPDA	NM_001098786	185	promoter	29923
ERGIC3	NM_015966	0	inside intron	51614
DDIT4L	NM_145244	0	inside exon	115265
HEBP2	NM_014320	125	promoter	23593
SOX5	NM_001261414	-125	promoter	6660
LMX1B	NM_001174146	0	inside intron	4010
ZNF317	NM_001190791	0	inside intron	57693
URB2	NM_014777	0	inside intron	9816
TMEM68	NM_001286657	0	inside intron	137695
SHC4	NM_203349	0	inside intron	399694
CD70	NM_001252	-41	promoter	970
HNRNPUL2	NM_001079559	-192	promoter	221092
FUT11	NM_001284194	0	inside exon	170384
CADPS2	NM_001009571	1835	downstream	93664
LRRC40	NM_017768	0	inside exon	55631
ZSCAN18	NM_001145542	0	inside intron	65982
PTTG1IP	NM_001286822	0	inside exon	754
PPAT	NM_002703	0	inside intron	5471
EHD1	NM_001282444	0	inside intron	10938
DCUN1D5	NM_032299	0	inside exon	84259
TSKU	NM_001258210	-1125	downstream	25987
NDOR1	NM_001144026	0	inside exon	27158
CEP57L1	NM_001083535	111	promoter	285753
RARS	NM_002887	165	promoter	5917
TCEB1	NM_001204857	-230	promoter	6921
SLC1A4	NM_001135581	0	inside exon	6509
CDK6	NM_001145306	0	inside intron	1021
ANKRD27	NM_032139	-21	promoter	84079
ABCA7	NM_019112	271	promoter	10347
C17orf53	NM_001171251	24	promoter	78995
IGF2BP3	NM_006547	-3875	upstream	10643
CNPPD1	NM_015680	0	inside intron	27013
PPP1R12B	NM_001167857	0	inside exon	4660
SUGP1	NM_021164	-63	promoter	57794
NUP160	NM_015231	0	inside exon	23279
EIF4G2	NM_001042559	-388	promoter	1982
MALT1	NM_006785	360	promoter	10892
SELK	NM_021237	0	inside exon	58515
LOC440461	NR_027283	0	inside exon	440461
FBXO30	NM_032145	-172	promoter	84085
PDGFRA	NM_006206	0	inside intron	5156
TIGD6	NM_001243253	0	inside exon	81789
ZBTB20	NM_001164342	-320	promoter	26137
BCAP29	NM_001008405	0	inside exon	55973
SASS6	NM_001304829	0	inside exon	163786
STARD13	NM_001243466	0	inside intron	90627
UMPS	NM_000373	0	inside exon	7372
S1PR1	NM_001400	0	inside intron	1901
NEIL2	NM_001135746	0	inside intron	252969
LMBRD1	NM_018368	0	inside exon	55788
TMEM131	NM_015348	-322	promoter	23505
MIF4GD	NM_001242498	0	inside intron	57409
FAM214B	NM_025182	0	inside intron	80256
TTC7A	NM_001288951	0	inside intron	57217
OSBPL1A	NM_001242508	0	inside intron	114876
DTNB	NM_001256303	-223	promoter	1838
NDUFS2	NM_001166159	0	inside exon	4720
FANCG	NM_004629	0	inside exon	2189
FREM2	NM_207361	0	inside exon	341640
HNRNPU	NM_004501	-185	promoter	3192
TMEM175	NM_001297423	0	inside intron	84286
RAPGEF6	NM_001164386	0	inside exon	51735
MNT	NM_020310	-70	promoter	4335
NECAB1	NM_022351	0	inside exon	64168
MDGA1	NM_153487	-7673	upstream	266727
TSNARE1	NM_001291931	238631	downstream	203062
RABIF	NM_002871	16654	downstream	5877
LIN37	NM_019104	0	inside intron	55957
NOL4	NM_001198546	-1227	promoter	8715
MLX	NM_170607	193	promoter	6945
GTF2H4	NM_001517	0	inside exon	2968
SARS	NM_006513	101	promoter	6301
HDAC11	NM_001136041	0	inside intron	79885
INPP5E	NM_019892	0	inside exon	56623
WDR60	NM_018051	241	promoter	55112
PAOX	NM_152911	687	promoter	196743
STAMBPL1	NM_020799	0	inside exon	57559
PRMT3	NM_001145166	0	inside intron	10196
NSMAF	NM_001144772	0	inside intron	8439
IRX5	NM_001252197	-2623	downstream	10265
ACTL6B	NM_016188	-49	promoter	51412
NRG1	NM_001159995	0	inside exon	3084
PARP16	NM_017851	-101	promoter	54956
BMP7	NM_001719	243286	downstream	655
IGSF9B	NM_001277285	-11	promoter	22997
SPRY1	NM_001258038	-102130	downstream	10252
LZTFL1	NM_001276378	0	inside intron	54585
P2RX6	NM_001159554	677	promoter	9127
BMF	NM_001003940	-120	promoter	90427
ATP5S	NM_001003803	0	inside exon	27109
MADCAM1	NM_130760	7925	upstream	8174
DUSP14	NM_007026	157	promoter	11072
CFAP69	NM_001039706	123	promoter	79846
DNAJC14	NM_032364	0	inside intron	85406
CCNK	NM_001099402	0	inside intron	8812
PTDSS2	NM_030783	0	inside intron	81490
IDE	NM_001165946	-375	promoter	3416
NEMF	NM_001301732	0	inside intron	9147
FZD8	NM_031866	-117	promoter	8325
CHD6	NM_032221	-76	promoter	84181
LEMD3	NM_001167614	0	inside exon	23592
FER	NM_005246	0	inside intron	2241
HOXC12	NM_173860	3658	upstream	3228
KLC4	NM_001289034	0	inside exon	89953
NDUFS6	NM_004553	152	promoter	4726
TIPRL	NM_001031800	75	promoter	261726
RPS13	NM_001017	0	inside intron	6207
LINC01551	NR_026731	0	inside intron	387978
SERTAD2	NM_014755	-114499	upstream	9792
KXD1	NM_001171948	0	inside intron	79036
MIS18A	NM_018944	-116	promoter	54069
RBM26	NM_001286631	-399	promoter	64062
NOP14	NM_001291978	0	inside exon	8602
TRMT10C	NM_017819	30	promoter	54931
MATN1	NM_002379	0	inside intron	4146
TGIF1	NM_001278682	0	inside intron	7050
CCNE2	NM_004702	-382	promoter	9134
SF3B4	NM_005850	0	inside exon	10262
EIF3L	NM_001242923	0	inside exon	51386
LRCH1	NM_001164211	0	inside exon	23143
KRT86	NM_002284	0	inside exon	3892
ARHGAP20	NM_001258415	0	inside intron	57569
RALGAPB	NM_001282917	26035	upstream	57148
EFR3A	NM_015137	0	inside intron	23167
AKR1B1	NM_001628	-174	promoter	231
TMEM126A	NM_001244735	0	inside exon	84233
CKAP2	NM_001098525	110	promoter	26586
IER5	NM_016545	-14811	downstream	51278
ARPC5	NM_001270439	0	inside exon	10092
BMPER	NM_133468	164	promoter	168667
FAM21A	NM_001005751	42	promoter	387680
TSEN34	NM_001077446	0	inside exon	79042
FAM46C	NM_017709	85	promoter	54855
PEX2	NM_000318	0	inside intron	5828
SP2	NM_003110	99	promoter	6668
NSMAF	NM_001144772	0	inside intron	8439
VPS51	NM_013265	0	inside exon	738
XXYLT1	NM_152531	0	inside intron	152002
SMARCD3	NM_001003801	-26558	upstream	6604
C19orf81	NM_001195076	0	inside exon	342918
SUMO1	NM_001005781	-157	promoter	7341
ZSCAN2	NM_001007072	403	promoter	54993
SDF2	NM_006923	0	inside exon	6388
DACT3	NM_001301046	-387	promoter	147906
STYK1	NM_018423	-59	promoter	55359
PPP2R5B	NM_006244	0	inside exon	5526
MRPL30	NM_016503	0	inside intron	51263
KHDC1	NM_001251874	0	inside intron	80759
CCDC97	NM_052848	225	promoter	90324
UBE2D3	NM_001300795	0	inside intron	7323
TNIP1	NM_001252385	0	inside intron	10318
IFI27L1	NM_145249	0	inside exon	122509
CRKL	NM_005207	322	promoter	1399
KLLN	NM_001126049	0	inside exon	100144748
ULBP3	NM_024518	0	inside exon	79465
OAT	NM_000274	0	inside exon	4942
DERL1	NM_001134671	-69	promoter	79139
FYTTD1	NM_001011537	0	inside exon	84248
TPPP3	NM_015964	0	inside exon	51673
C1orf21	NM_030806	0	inside intron	81563
NR1H3	NM_001130101	0	inside intron	10062
MAP3K8	NM_001244134	290	promoter	1326
PPP4C	NM_001303503	0	inside intron	5531
FBXL19-AS1	NM_175901	0	inside exon	283932
H2AFY2	NM_018649	0	inside exon	55506
SETD6	NM_001160305	510	promoter	79918
IPO5	NM_002271	0	inside intron	3843
ZNF880	NM_001145434	0	inside intron	400713
TENM3	NM_001080477	2085820	upstream	55714
ZC3H7B	NM_017590	92	promoter	23264
RSPO3	NM_032784	509	promoter	84870
ARHGEF3	NM_001128615	0	inside exon	50650
ZFAT	NM_001029939	-245	promoter	57623
CCDC85C	NM_001144995	-1085	promoter	317762
COMMD5	NM_001081003	0	inside intron	28991
PSMC3	NM_002804	-282	promoter	5702
IDH2	NM_001289910	-259	promoter	3418
DSP	NM_001008844	0	inside intron	1832
TMEM161B	NM_001289007	-365	promoter	153396
ISCU	NM_001301140	0	inside intron	23479
MEF2D	NM_001271629	-4543	upstream	4209
REXO2	NM_015523	57	promoter	25996
RAB2B	NM_001163380	2726	downstream	84932
HHIPL2	NM_024746	56630	downstream	79802
CLEC4G	NM_001244856	0	inside intron	339390
TMEM132B	NM_001286219	0	inside intron	114795
SERINC3	NM_006811	0	inside exon	10955
BTG3	NM_001130914	0	inside intron	10950
DLX1	NM_001038493	2135	promoter	1745
ADAM17	NM_003183	-209	promoter	6868
ZBTB18	NM_001278196	918	promoter	10472
KLHL20	NM_014458	35	promoter	27252
DNAJC28	NM_001040192	0	inside intron	54943
DLST	NM_001244883	97	promoter	1743
CDK5	NM_001164410	0	inside exon	1020
NRG3	NM_001010848	0	inside exon	10718
LOC400927	NR_002821	0	inside exon	400927
TBCB	NM_001281	0	inside exon	1155
CDH13	NM_001220488	0	inside exon	1012
CLP1	NM_001142597	80	promoter	10978
IRX3	NM_024336	-294	promoter	79191
CTNNB1	NM_001098209	0	inside exon	1499
ISLR2	NM_001130136	0	inside intron	57611
RILPL2	NM_145058	-197	promoter	196383
ZFAT	NM_001029939	-118550	upstream	57623
MDGA2	NM_001113498	0	inside intron	161357
OAT	NM_000274	0	inside exon	4942
JAG1	NM_000214	0	inside intron	182
ZNF385B	NM_001113397	0	inside intron	151126
HSD17B7P2	NM_001031744	-36367	downstream	158160
LYSMD3	NM_001286812	0	inside intron	116068
ITPR1	NM_001099952	78	promoter	3708
IER5	NM_016545	0	inside exon	51278
DDX12P	NM_004400	-10803	upstream	440081
RFWD2	NM_001001740	-149	promoter	64326
PSMB9	NM_002800	-34608	downstream	5698
CEP135	NM_014645	0	inside intron	9662
MFF	NM_001277061	21	promoter	56947
AASDHPPT	NM_015423	0	inside exon	60496
C2	NM_000063	40	promoter	717
KANSL1L	NM_152519	-258	promoter	151050
TRIB1	NM_001282985	0	inside exon	10221
TUBGCP2	NM_001256617	0	inside intron	10844
MBOAT7	NM_001146056	-75	promoter	79143
ZFAND2B	NM_001270998	138	promoter	130617
PRICKLE4	NM_013397	0	inside exon	29964
CDADC1	NM_001193478	97	promoter	81602
MTERF1	NM_001301134	-310	promoter	7978
ZNF830	NM_052857	5	promoter	91603
ATP5J2-PTCD1	NM_001198879	0	inside intron	100526740
IBTK	NM_001300906	-393	promoter	25998
EXOC3L1	NM_178516	39	downstream	283849
TMEM11	NM_003876	0	inside intron	8834
ZNF776	NM_173632	0	inside intron	284309
FAM169B	NM_182562	8602	downstream	283777
CHD1	NM_001270	-3003	upstream	1105
TMEM92	NM_001168215	0	inside intron	162461
C3orf18	NM_001171740	0	inside intron	51161
RIOK3	NM_003831	0	inside exon	8780
ZSCAN25	NM_145115	124	promoter	221785
ZNF521	NM_015461	0	inside intron	25925
AP4E1	NM_001252127	22	promoter	23431
ZNF697	NM_001080470	-130	promoter	90874
FPGS	NM_001018078	198	promoter	2356
AUTS2	NM_001127231	1284	promoter	26053
PSENEN	NM_001281532	0	inside exon	55851
MRPL4	NM_015956	0	inside intron	51073
EIF4EBP2	NM_004096	143	promoter	1979
RPA2	NM_001286076	0	inside intron	6118
EIF3J	NM_001284335	0	inside exon	8669
ASTN1	NM_001286164	0	inside exon	460
TFB2M	NM_022366	-7	promoter	64216
FAM214B	NM_025182	-632	promoter	80256
DNAJB4	NM_007034	25	promoter	11080
ZNF576	NM_001145347	106	promoter	79177
ORMDL1	NM_001128150	0	inside intron	94101
ATP5H	NM_001003785	-53	promoter	10476
CYB561D2	NM_001291284	0	inside intron	11068
SLC6A17	NM_001010898	13402	upstream	388662
SAYSD1	NM_001304793	-99	promoter	55776
TANK	NM_001199135	-2412	downstream	10010
B3GAT2	NM_080742	0	inside intron	135152
TSGA13	NM_001304968	0	inside exon	114960
PLEKHG5	NM_001042663	0	inside intron	57449
GPATCH2L	NM_017926	0	inside intron	55668
MICALL1	NM_033386	0	inside exon	85377
ARL14EP	NM_152316	139	promoter	120534
SEC24D	NM_014822	0	inside exon	9871
CCDC77	NM_001130146	0	inside intron	84318
NR4A2	NM_006186	-381	promoter	4929
PTPRS	NM_002850	0	inside intron	5802
U2AF2	NM_001012478	291	promoter	11338
ACBD4	NM_001135704	0	inside exon	79777
BRMS1	NM_001024957	-79	promoter	25855
OTP	NM_032109	0	inside exon	23440
PCSK2	NM_001201528	0	inside intron	5126
NT5M	NM_020201	249	promoter	56953
DUSP6	NM_001946	0	inside exon	1848
BRD2	NM_001113182	0	inside intron	6046
SRPK2	NM_001278273	0	inside intron	6733
MCRS1	NM_001012300	-307	promoter	10445
E2F3	NM_001243076	0	inside intron	1871
RABGEF1	NM_001287060	-33524	downstream	27342
ZNF410	NM_001242924	0	inside exon	57862
UBQLN4	NM_001304342	-426	promoter	56893
TUBG2	NM_016437	5538	upstream	27175
SOGA3	NM_001012279	0	inside exon	387104
AXDND1	NM_144696	0	inside exon	126859
APPBP2	NM_001282476	0	inside intron	10513
SAP18	NM_005870	195	promoter	10284
CD44	NM_000610	0	inside exon	960
RBBP8	NM_002894	175	promoter	5932
PLGRKT	NM_018465	0	inside intron	55848
NOP9	NM_001286367	0	inside exon	161424
NCEH1	NM_001146276	0	inside exon	57552
POM121	NM_001257190	0	inside exon	9883
EYA2	NM_005244	76	promoter	2139
KLK10	NM_001077500	0	inside intron	5655
SLC16A1	NM_001166496	0	inside exon	6566
SSC5D	NM_001144950	0	inside intron	284297
RIOK1	NM_031480	0	inside exon	83732
UBOX5	NM_001267584	-13	promoter	22888
ZNF347	NM_001172674	-401	promoter	84671
IRF2BPL	NM_024496	-136	promoter	64207
FAM183A	NM_001101376	0	inside exon	440585
PDCD11	NM_014976	0	inside exon	22984
LZTR1	NM_006767	0	inside intron	8216
POLR1C	NM_004875	0	inside exon	9533
WNT3A	NM_033131	0	inside intron	89780
REV3L	NM_001286431	0	inside exon	5980
LOC100133315	NR_029192	-101	promoter	100133315
MPDZ	NM_001261406	0	inside exon	8777
NKAIN2	NM_001040214	0	inside exon	154215
FAM188A	NM_024948	0	inside intron	80013
CABLES2	NM_031215	-440	promoter	81928
WBP4	NM_007187	0	inside intron	11193
NOSIP	NM_001270960	-88	promoter	51070
ELL3	NM_025165	0	inside intron	80237
CDC25C	NM_001287582	0	inside intron	995
TAF11	NM_001270488	0	inside exon	6882
SLC35C1	NM_001145265	0	inside intron	55343
C1orf198	NM_001136494	0	inside intron	84886
GUF1	NM_021927	56	promoter	60558
IFFO1	NM_001039670	-86	promoter	25900
KCNAB3	NM_004732	0	inside exon	9196
ANKRD54	NM_138797	-42	promoter	129138
MME	NM_000902	0	inside intron	4311
ATOH8	NM_032827	0	inside exon	84913
SMOC1	NM_001034852	0	inside intron	64093
LRRC75A	NM_001113567	0	inside intron	388341
FAM98A	NM_001304538	-494	promoter	25940
DENND5B	NM_144973	0	inside exon	160518
BARX1	NM_021570	0	inside exon	56033
UHRF2	NM_152896	106	promoter	115426
COA6	NM_001012985	89	promoter	388753
ASF1B	NM_018154	0	inside intron	55723
ATMIN	NM_001300728	0	inside intron	23300
ACHE	NM_000665	0	inside intron	43
ACBD6	NM_032360	0	inside exon	84320
PIH1D1	NM_017916	0	inside exon	55011
VEZF1	NM_007146	0	inside intron	7716
FAM98A	NM_001304538	-157	promoter	25940
OAZ2	NM_001301302	-37	promoter	4947
WRNIP1	NM_020135	0	inside exon	56897
SPSB1	NM_025106	-59371	downstream	80176
PTRH2	NM_001015509	0	inside intron	51651
DPP6	NM_001039350	552	promoter	1804
FXN	NM_000144	0	inside exon	2395
VCPIP1	NM_025054	0	inside exon	80124
MLF1	NM_001130156	50	promoter	4291
LRRC3B	NM_052953	119	promoter	116135
ALG1	NM_019109	0	inside intron	56052
ZFYVE16	NM_001105251	113	promoter	9765
LEP	NM_000230	72819	upstream	3952
MTIF3	NM_001166261	0	inside intron	219402
PTK2B	NM_004103	0	inside exon	2185
WDR81	NM_001163673	0	inside intron	124997
PRKCB	NM_002738	332	promoter	5579
POLG	NM_001126131	-64747	upstream	5428
NHLH2	NM_001111061	0	inside intron	4808
NPPC	NM_024409	-45	promoter	4880
HES1	NM_005524	1572	promoter	3280
PTPN23	NM_001304482	161	promoter	25930
MED13	NM_005121	-803	promoter	9969
HNRNPR	NM_001102397	-34	promoter	10236
RPIA	NM_144563	438	promoter	22934
DPY19L4	NM_181787	0	inside intron	286148
CORO1C	NM_001105237	0	inside intron	23603
ERAP1	NM_001040458	0	inside intron	51752
LRRC41	NM_006369	-38	promoter	10489
ZNF599	NM_001007247	0	inside intron	148103
MGAT3	NM_001098270	0	inside exon	4248
AVL9	NM_015060	0	inside intron	23080
AMZ2	NM_001033569	151	promoter	51321
RBPJ	NM_005349	0	inside intron	3516
ZNF74	NM_001256523	87	promoter	7625
BCL6	NM_001130845	0	inside exon	604
RFT1	NM_052859	-118	promoter	91869
UBE2B	NM_003337	0	inside intron	7320
ATXN7L3	NM_001098833	-2668	upstream	56970
COLCA2	NM_001136105	0	inside intron	120376
ASCC1	NM_001198798	0	inside intron	51008
MRPS30	NM_016640	0	inside exon	10884
MYO1E	NM_004998	0	inside exon	4643
DDX18	NM_006773	79	promoter	8886
DUSP4	NM_001394	0	inside intron	1846
PPP1R7	NM_001282409	0	inside intron	5510
MAP3K10	NM_002446	592	promoter	4294
VAPB	NM_001195677	0	inside intron	9217
DAPK1	NM_001288729	0	inside intron	1612
ZNF77	NM_021217	-5391	upstream	58492
TSR1	NM_018128	0	inside exon	55720
RHOG	NM_001665	-843	promoter	391
DEPDC5	NM_001007188	204	promoter	9681
FZD2	NM_001466	668	promoter	2535
FEZ2	NM_001042548	0	inside exon	9637
SUV39H2	NM_001193424	519	promoter	79723
TMEM43	NM_024334	0	inside exon	79188
MIEF2	NM_001144900	0	inside exon	125170
GPR158	NM_020752	0	inside intron	57512
SRM	NM_003132	0	inside intron	6723
TANC2	NM_015623	42491	upstream	26115
DEDD2	NM_001270614	0	inside intron	162989
NDUFA10	NM_004544	-188	promoter	4705
LRRC58	NM_001099678	-137	promoter	116064
FN3K	NM_022158	-284	downstream	64122
CNPPD1	NM_015680	0	inside exon	27013
DAAM1	NM_001270520	0	inside exon	23002
SMARCA2	NM_001289396	0	inside intron	6595
FAM212A	NM_203370	540	promoter	389119
FAM160A1	NM_001109977	6	promoter	729830
MANBA	NM_005908	-180	promoter	4126
XPO1	NM_003400	-52	promoter	7514
SGMS1	NM_147156	-302	promoter	259230
DCUN1D5	NM_032299	-160	promoter	84259
EIF2AK3	NM_004836	-123	promoter	9451
NETO1	NM_001201465	0	inside exon	81832
ZNF777	NM_015694	-199	promoter	27153
NOA1	NM_032313	-66	promoter	84273
KANSL3	NM_001115016	-105	promoter	55683
SDE2	NM_152608	-269	promoter	163859
TCF7L2	NM_001146274	0	inside intron	6934
OPCML	NM_001012393	0	inside intron	4978
GBX2	NM_001301687	-10495	upstream	2637
ESRP2	NM_024939	-1353	promoter	80004
WDR46	NM_001164267	0	inside exon	9277
SLC39A11	NM_001159770	105601	downstream	201266
RBM12B	NM_203390	0	inside intron	389677
SYS1-DBNDD2	NR_003189	0	inside intron	767557
EIF3M	NM_006360	0	inside intron	10480
LOC100288748	NR_034034	0	inside exon	100288748
ZNF302	NM_001012320	173	promoter	55900
OTUD4	NM_001102653	-1214	promoter	54726
WEE2-AS1	NM_173677	0	inside intron	285962
SAMHD1	NM_015474	0	inside intron	25939
EXD2	NM_001193360	0	inside intron	55218
MYCN	NM_001293228	0	inside intron	4613
CHSY3	NM_175856	0	inside exon	337876
TMEM14C	NM_001165258	0	inside intron	51522
PDCD4	NM_001199492	0	inside intron	27250
RPN1	NM_002950	0	inside intron	6184
CAPRIN1	NM_005898	169	promoter	4076
SUCLG1	NM_003849	-205	promoter	8802
CADM1	NM_001098517	0	inside intron	23705
GLIPR2	NM_001287010	0	inside intron	152007
CHD9	NM_025134	154	promoter	80205
PRKCA	NM_002737	0	inside exon	5578
HLA-G	NM_002127	0	inside intron	3135
HPSE	NM_001098540	0	inside exon	10855
ASB8	NM_024095	0	inside intron	140461
AP5M1	NM_018229	0	inside exon	55745
SENP7	NM_001077203	-83	promoter	57337
TIFA	NM_052864	-72	promoter	92610
LRRC8C	NM_032270	-43869	downstream	84230
ZSCAN2	NM_001007072	574	promoter	54993
ABCA2	NM_001606	0	inside intron	20
PPP1R15B	NM_032833	0	inside exon	84919
TOR3A	NM_022371	129	promoter	64222
ATP6V0E2	NM_001100592	-167512	downstream	155066
GNA14	NM_004297	-355	promoter	9630
UCHL5	NM_001199261	0	inside exon	51377
LMO2	NM_001142315	29162	downstream	4005
MPC1	NM_001270879	-78	promoter	51660
PDGFA	NM_002607	0	inside exon	5154
STAM2	NM_005843	0	inside exon	10254
GNL1	NM_005275	0	inside exon	2794
NPRL2	NM_006545	0	inside exon	10641
MRM1	NM_024864	191	promoter	79922
CYB5D1	NM_144607	0	inside exon	124637
PARK7	NM_001123377	254	promoter	11315
ASCC3	NM_001284271	-280	promoter	10973
CLCN2	NM_001171087	-315	promoter	1181
NAPG	NM_003826	0	inside intron	8774
SLAIN1	NM_001040153	113	promoter	122060
ELOVL6	NM_001130721	0	inside exon	79071
ZNF846	NM_001077624	-285	promoter	162993
CUTA	NM_001014433	0	inside exon	51596
GLB1	NM_000404	-178	promoter	2720
NRP1	NM_001024628	0	inside exon	8829
MAB21L3	NM_152367	-17165	downstream	126868
PMF1-BGLAP	NM_001199661	0	inside intron	100527963
EIF3E	NM_001568	-30	promoter	3646
EFNB2	NM_004093	-1226	promoter	1948
UBAP2	NM_001282529	-347	promoter	55833
CLK4	NM_020666	0	inside intron	57396
TTLL1	NM_001008572	-102	promoter	25809
RUNX1	NM_001001890	0	inside intron	861
RNF31	NM_017999	0	inside intron	55072
MAP3K5	NM_005923	-561	promoter	4217
FKBP1A-SDCBP2	NR_037661	-100	promoter	100528031
MRPS31	NM_005830	0	inside exon	10240
TTC17	NM_018259	-84245	downstream	55761
CEP95	NM_138363	86	promoter	90799
UPF3A	NM_023011	292	promoter	65110
NPM2	NM_001286680	0	inside exon	10361
ALOX5	NM_000698	168	promoter	240
FBXL13	NM_001111038	0	inside exon	222235
TUBA1B	NM_006082	-170	promoter	10376
ELAC2	NM_001165962	-12	promoter	60528
TXNDC15	NM_024715	0	inside exon	79770
TCP1	NM_001008897	-153	promoter	6950
SP8	NM_182700	3668	downstream	221833
FUT11	NM_001284194	0	inside exon	170384
SRGAP3	NM_001033116	0	inside exon	9901
AKR1B1	NM_001628	0	inside exon	231
TYSND1	NM_001040273	-20	promoter	219743
TBL2	NM_012453	-88	promoter	26608
MPC1	NM_001270879	-785	promoter	51660
OSBPL5	NM_001144063	0	inside intron	114879
GDF11	NM_005811	0	inside intron	10220
BARHL1	NM_020064	0	inside intron	56751
CTXN1	NM_206833	0	inside exon	404217
TMOD3	NM_014547	0	inside intron	29766
IRX5	NM_001252197	1082	promoter	10265
ALDH7A1	NM_001182	-150	promoter	501
NOLC1	NM_001284388	0	inside exon	9221
SRCIN1	NM_025248	0	inside intron	80725
CEP63	NM_001042383	0	inside exon	80254
TBP	NM_001172085	22	promoter	6908
DIMT1	NM_014473	0	inside intron	27292
DCTN6	NM_006571	0	inside intron	10671
HIST1H2AK	NM_003510	0	inside exon	8330
CHP1	NM_007236	-1867	downstream	11261
HIST1H1C	NM_005319	133	close to 3'	3006
ZNF575	NM_174945	0	inside intron	284346
APC	NM_000038	85	promoter	324
FAM134C	NM_178126	0	inside exon	162427
EPM2AIP1	NM_014805	0	inside exon	9852
PTPRK	NM_001135648	0	inside exon	5796
WNT11	NM_004626	-24900	upstream	7481
PRIMA1	NM_178004	-50	promoter	145270
ATP6V1G2-DDX39B	NR_037853	0	inside intron	100532737
CCDC59	NM_014167	0	inside exon	29080
NEMF	NM_001301732	-10160	upstream	9147
EEF1B2	NM_001037663	0	inside exon	1933
NWD2	NM_001144990	636	promoter	57495
MIF-AS1	NR_038911	0	inside exon	284889
HBS1L	NM_001145158	0	inside exon	10767
ANKHD1-EIF4EBP3	NM_020690	1115	promoter	404734
WNT16	NM_016087	0	inside intron	51384
HIVEP2	NM_006734	-1111	promoter	3097
LRSAM1	NM_001005373	0	inside exon	90678
NFYB	NM_006166	-299	promoter	4801
MAN1A1	NM_005907	0	inside exon	4121
RIPK1	NM_003804	0	inside intron	8737
DDX21	NM_001256910	0	inside exon	9188
NFIA	NM_001134673	26816	upstream	4774
COA7	NM_023077	0	inside exon	65260
AEBP2	NM_001114176	0	inside exon	121536
CPNE3	NM_003909	63	promoter	8895
UBAP2	NM_001282529	0	inside intron	55833
HIVEP2	NM_006734	0	inside intron	3097
GJA3	NM_021954	0	inside intron	2700
RABL6	NM_001173988	0	inside exon	55684
RASA1	NM_002890	0	inside exon	5921
TMEM17	NM_198276	0	inside intron	200728
VAC14	NM_018052	0	inside exon	55697
KDM4C	NM_001146694	0	inside exon	23081
GGCX	NM_000821	-101	promoter	2677
FRS3	NM_006653	-155	promoter	10817
ABCB9	NM_001243013	0	inside exon	23457
C1orf109	NM_001303030	0	inside intron	54955
RAB23	NM_001278666	-141	promoter	51715
KIAA1715	NM_001305008	-169	promoter	80856
ZCWPW2	NM_001040432	-50672	downstream	152098
ASB6	NM_001202403	0	inside intron	140459
GNAS	NM_000516	0	inside intron	2778
ATP6V1G2-DDX39B	NR_037853	0	inside intron	100532737
ACBD4	NM_001135704	0	inside intron	79777
PPP1R1B	NM_001242464	8828	upstream	84152
RALBP1	NM_006788	202	promoter	10928
TRAPPC11	NM_021942	-85006	downstream	60684
FOSL2	NM_005253	1907	promoter	2355
SHF	NM_001301168	0	inside intron	90525
ZNF184	NM_007149	0	inside exon	7738
IGSF8	NM_001206665	-434	promoter	93185
PRKAB2	NM_005399	0	inside exon	5565
ALX3	NM_006492	-13805	upstream	257
DUSP6	NM_001946	0	inside exon	1848
TRIM8	NM_030912	0	inside exon	81603
CLASP1	NM_001142273	0	inside intron	23332
KCNN2	NM_001278204	529	promoter	3781
B3GALNT1	NM_001038628	0	inside intron	8706
PMS1	NM_000534	0	inside exon	5378
KLHL9	NM_001040713	0	inside exon	55958
UCK2	NM_012474	0	inside intron	7371
MTHFD1	NM_005956	0	inside exon	4522
UPK3A	NM_001167574	16195	upstream	7380
RPAIN	NM_001033002	0	inside exon	84268
HS6ST1	NM_004807	-3470	upstream	9394
RIMS2	NM_001100117	0	inside exon	9699
MIA3	NM_001300867	0	inside intron	375056
ZNF441	NM_152355	0	inside exon	126068
LRIG3	NM_001136051	-211	promoter	121227
AP1AR	NM_001128426	261	promoter	55435
SBDS	NM_016038	-3	promoter	51119
CENPW	NM_001012507	0	inside exon	387103
OSER1	NM_016470	0	inside exon	51526
WNT11	NM_004626	-25159	upstream	7481
TBX2	NM_005994	54	promoter	6909
ELMOD1	NM_001130037	592	promoter	55531
FAM65B	NM_001286445	0	inside intron	9750
ADAM19	NM_023038	0	inside intron	8728
VSIG10	NM_019086	0	inside intron	54621
CLK3	NM_001130028	0	inside exon	1198
SYS1	NM_001099791	0	inside intron	90196
SLC17A5	NM_012434	-412	promoter	26503
POLG2	NM_007215	0	inside exon	11232
CLN3	NM_000086	0	inside intron	1201
SCRN1	NM_001145513	0	inside intron	9805
EMX1	NM_001040404	0	inside exon	2016
EYA3	NM_001282560	0	inside exon	2140
ERLIN1	NM_001100626	-145	promoter	10613
KLF6	NM_001008490	-222	promoter	1316
FOXJ3	NM_001198850	0	inside intron	22887
MYC	NM_002467	0	inside exon	4609
ANO8	NM_020959	-39	promoter	57719
NCEH1	NM_001146276	0	inside exon	57552
DNAJC6	NM_001256864	0	inside intron	9829
SLC38A9	NM_001258286	0	inside intron	153129
TCAF2	NM_001130025	701	promoter	285966
OPA1	NM_015560	0	inside exon	4976
NELFA	NM_005663	0	inside intron	7469
TRMT5	NM_020810	0	inside intron	57570
ZNF8	NM_021089	403	promoter	7554
TEFM	NM_024683	0	inside exon	79736
NRP2	NM_003872	0	inside exon	8828
MKLN1	NM_001145354	3048	upstream	4289
RTN4	NM_007008	0	inside intron	57142
FOXRED1	NM_017547	0	inside exon	55572
FBXO46	NM_001080469	0	inside intron	23403
SDR39U1	NM_001290292	0	inside exon	56948
COLCA2	NM_001136105	0	inside intron	120376
MAF	NM_001031804	0	inside exon	4094
ZNF248	NM_001267597	0	inside intron	57209
DIS3L	NM_001143688	112	promoter	115752
NBPF20	NM_001278267	0	inside intron	100288142
DDX12P	NM_004400	-11076	upstream	440081
NRG2	NM_001184935	-193	promoter	9542
RSPO2	NM_001282863	-5	promoter	340419
GIT1	NM_001085454	0	inside intron	28964
RTF1	NM_015138	0	inside intron	23168
HHIPL2	NM_024746	0	inside exon	79802
FARSA	NM_004461	-80	promoter	2193
TP53I13	NM_138349	0	inside exon	90313
MMP16	NM_005941	-1386	promoter	4325
GART	NM_000819	0	inside intron	2618
WDR5	NM_017588	0	inside intron	11091
DAAM1	NM_001270520	49	promoter	23002
RET	NM_000323	0	inside intron	5979
ZNF302	NM_001012320	0	inside exon	55900
PLEKHA2	NM_021623	0	inside exon	59339
VPS13B	NM_015243	613	promoter	157680
EPG5	NM_020964	-51	promoter	57724
TMEM126A	NM_001244735	203	promoter	84233
MED23	NM_001270521	0	inside intron	9439
PPP1R18	NM_001134870	0	inside exon	170954
ASNS	NM_001178075	-54	promoter	440
SND1	NM_014390	544	promoter	27044
SIX6	NM_007374	0	inside intron	4990
ZNF428	NM_182498	-284	promoter	126299
AVL9	NM_015060	0	inside intron	23080
ZNF248	NM_001267597	0	inside exon	57209
VPS18	NM_020857	102	promoter	57617
KCTD1	NM_001136205	0	inside intron	284252
AATF	NM_012138	270	promoter	26574
RTCA	NM_001130841	81	promoter	8634
SPRYD7	NM_001127482	-197	promoter	57213
RCOR3	NM_001136223	602	promoter	55758
TRIM27	NM_006510	63872	downstream	5987
PLCL1	NM_006226	297	promoter	5334
ELAVL3	NM_001420	0	inside intron	1995
WHSC1L1	NM_017778	-879	promoter	54904
USP1	NM_001017415	0	inside exon	7398
RANBP3	NM_001300865	-470	promoter	8498
LMX1A	NM_001033507	0	inside intron	4009
SLIRP	NM_001267863	0	inside intron	81892
UCHL5	NM_001199261	0	inside intron	51377
EVX2	NM_001080458	0	inside intron	344191
SLC44A2	NM_001145056	0	inside intron	57153
ACSS3	NM_024560	131	promoter	79611
FAM19A2	NM_178539	0	inside intron	338811
PLK1	NM_005030	122	promoter	5347
SHPRH	NM_001042683	-55	promoter	257218
CMC2	NM_020188	43507	downstream	56942
GABPB1	NM_002041	0	inside exon	2553
ULBP3	NM_024518	-19	promoter	79465
YTHDC2	NM_022828	0	inside intron	64848
TLE4	NM_001282748	1380	promoter	7091
C11orf71	NM_001271562	0	inside exon	54494
KIAA0319	NM_001168374	0	inside exon	9856
OXR1	NM_001198532	0	inside exon	55074
TRMT10C	NM_017819	134	promoter	54931
FBRS	NM_001105079	1424	promoter	64319
ZNF322	NM_001242797	-180	promoter	79692
LNPEP	NM_005575	0	inside exon	4012
TUBB	NM_001293212	211	promoter	203068
ZIC2	NM_007129	0	inside intron	7546
C6orf1	NM_001008703	0	inside intron	221491
SNAPC1	NM_003082	-16477	downstream	6617
ZNF438	NM_001143766	0	inside exon	220929
LIN54	NM_001115007	0	inside intron	132660
ADSS	NM_001126	0	inside exon	159
TRAP1	NM_001272049	0	inside intron	10131
SLC35E4	NM_001001479	0	inside exon	339665
MUM1	NM_032853	313	promoter	84939
FAM161A	NM_001201543	130115	downstream	84140
TOP1	NM_003286	11	promoter	7150
RFX3	NM_001282116	42875	downstream	5991
HHEX	NM_002729	-4039	downstream	3087
NDUFAF5	NM_001039375	0	inside exon	79133
MRM1	NM_024864	-33352	downstream	79922
NCKAP1	NM_013436	0	inside exon	10787
DDX42	NM_007372	215	promoter	11325
TYK2	NM_003331	0	inside exon	7297
C1orf61	NM_006365	0	inside intron	10485
ERAL1	NM_005702	0	inside exon	26284
INAFM1	NM_178511	1013	promoter	255783
TAF1A	NM_001201536	0	inside exon	9015
LANCL2	NM_018697	0	inside intron	55915
SLC26A5	NM_001167962	-1156	promoter	375611
MED4	NM_001270629	-114	promoter	29079
NDUFC2-KCTD14	NM_001203260	0	inside exon	100532726
WNT7A	NM_004625	-271	promoter	7476
CCDC173	NM_001085447	0	inside exon	129881
ZNF547	NM_173631	10	promoter	284306
PTMA	NM_001099285	0	inside intron	5757
IQCK	NM_001305121	0	inside exon	124152
OSBPL3	NM_015550	-1448	promoter	26031
SPATA5	NM_145207	0	inside exon	166378
ARHGEF3	NM_001128615	0	inside intron	50650
BATF3	NM_018664	-758	promoter	55509
MDGA1	NM_153487	0	inside exon	266727
MOCS2	NM_004531	-157	promoter	4338
ZADH2	NM_175907	0	inside exon	284273
WDR19	NM_025132	89	promoter	57728
ZNF432	NM_014650	0	inside exon	9668
CDK5R2	NM_003936	-1293	downstream	8941
CD164	NM_001142401	-139	promoter	8763
C12orf43	NM_001286191	-56	promoter	64897
GPR37	NM_005302	-10	promoter	2861
RHBDD1	NM_001167608	113	promoter	84236
CDK13	NM_003718	0	inside exon	8621
COLGALT2	NM_001303420	0	inside intron	23127
SLC16A7	NM_001270622	0	inside intron	9194
NCBP2	NM_001042540	0	inside intron	22916
UBE2N	NM_003348	0	inside intron	7334
ARF3	NM_001659	-373	promoter	377
RFC2	NM_001278791	-467	promoter	5982
TMEM237	NM_001044385	0	inside intron	65062
SETD3	NM_032233	0	inside intron	84193
PAX6	NM_000280	0	inside intron	5080
CACNA1A	NM_000068	-92	promoter	773
BCCIP	NM_016567	0	inside exon	56647
ACTR2	NM_001005386	0	inside intron	10097
MAN2B2	NM_001292038	143	promoter	23324
RBM34	NM_001161533	-32	promoter	23029
RAB29	NM_001135662	-138	promoter	8934
GRK5	NM_005308	354	promoter	2869
ZNF365	NM_014951	0	inside intron	22891
CLGN	NM_001130675	0	inside intron	1047
UQCC3	NM_001085372	0	inside exon	790955
SETD4	NM_001007258	0	inside intron	54093
CELF4	NM_001025087	-726	promoter	56853
VAV3	NM_001079874	0	inside exon	10451
TTPA	NM_000370	-124	promoter	7274
LCMT2	NM_014793	0	inside exon	9836
SYT17	NM_016524	205	promoter	51760
TMEM30A	NM_001143958	-241	promoter	55754
BLM	NM_000057	555	promoter	641
SIRT5	NM_001193267	611	promoter	23408
MRPS6	NM_032476	-58846	downstream	64968
ZNF69	NM_021915	86	promoter	7620
B4GAT1	NM_006876	-258	promoter	11041
SYT17	NM_016524	407	promoter	51760
TTC23L	NM_144725	0	inside intron	153657
LINC01530	NR_034159	0	inside exon	729975
STIL	NM_001048166	0	inside intron	6491
PMAIP1	NM_021127	38	promoter	5366
ASB1	NM_001040445	181	promoter	51665
NDUFAF7	NM_001083946	0	inside exon	55471
FGF2	NM_002006	0	inside intron	2247
ZNF500	NM_001303450	-99	promoter	26048
HIGD1A	NM_001099668	-104	promoter	25994
ALDH1B1	NM_000692	0	inside intron	219
BRD2	NM_001113182	0	inside intron	6046
PRAC1	NM_032391	2526	downstream	84366
ITGA2	NM_002203	0	inside exon	3673
TIMM50	NM_001001563	0	inside exon	92609
CYB5R3	NM_000398	0	inside intron	1727
RAP2A	NM_021033	528	promoter	5911
NR4A2	NM_006186	-8782	upstream	4929
ADCY8	NM_001115	0	inside exon	114
COQ10B	NM_025147	263	promoter	80219
MAD2L1	NM_002358	-194	promoter	4085
PHYHIPL	NM_001143774	323	promoter	84457
TRMT10A	NM_001134665	0	inside exon	93587
SIRT5	NM_001193267	0	inside exon	23408
PFDN5	NM_002624	145	promoter	5204
HOOK1	NM_015888	121	promoter	51361
GNB1L	NM_053004	-375	promoter	54584
CMTM4	NM_178818	-338	promoter	146223
SELK	NM_021237	0	inside exon	58515
GSTZ1	NM_001513	0	inside exon	2954
ZW10	NM_004724	-78	promoter	9183
LOC441242	NM_001013464	0	inside intron	441242
BMP3	NM_001201	20	promoter	651
TAX1BP1	NM_001079864	0	inside intron	8887
BAZ1B	NM_023005	-85	promoter	9031
TRIB2	NM_021643	0	inside intron	28951
ORMDL3	NM_139280	-153	promoter	94103
HLA-E	NM_005516	0	inside exon	3133
POLR3F	NM_001282526	3	promoter	10621
LMTK3	NM_001080434	-488	promoter	114783
CREB3L1	NM_052854	0	inside intron	90993
NKX2-3	NM_145285	0	inside exon	159296
MGME1	NM_052865	107	promoter	92667
KCTD16	NM_020768	44	promoter	57528
GMPR	NM_006877	139	promoter	2766
SEC61A1	NM_013336	578	promoter	29927
IGFBP2	NM_000597	235	promoter	3485
AP2M1	NM_001025205	0	inside intron	1173
CCDC126	NM_138771	0	inside exon	90693
CDO1	NM_001801	-15	promoter	1036
GATA3	NM_001002295	1494	promoter	2625
PRPSAP2	NM_001243936	0	inside intron	5636
FUT8	NM_004480	0	inside intron	2530
PSD2	NM_032289	8330	upstream	84249
MRPS2	NM_016034	145	promoter	51116
GGH	NM_003878	-59	promoter	8836
MAD1L1	NM_001013836	0	inside intron	8379
BASP1	NM_001271606	0	inside intron	10409
HDAC4	NM_006037	-367	promoter	9759
RAB4B-EGLN2	NR_037791	0	inside intron	100529264
CHEK2	NM_001005735	0	inside intron	11200
PRDM1	NM_001198	91745	upstream	639
ANKRD11	NM_001256182	0	inside exon	29123
RFX3	NM_001282116	-961	promoter	5991
NSUN6	NM_182543	0	inside exon	221078
RPL26L1	NM_016093	0	inside intron	51121
CKAP2	NM_001098525	140	promoter	26586
EEF2	NM_001961	0	inside intron	1938
ACACA	NM_000664	0	inside intron	31
KCNH3	NM_012284	951	promoter	23416
FMNL3	NM_175736	0	inside intron	91010
C17orf67	NM_001085430	11865	downstream	339210
RUFY4	NM_198483	79	promoter	285180
FTO	NM_001080432	14	promoter	79068
CHRM3	NM_000740	241196	upstream	1131
POU3F2	NM_005604	2472	promoter	5454
CA13	NM_198584	106	promoter	377677
DKK2	NM_014421	0	inside intron	27123
LOC643339	NR_040096	0	inside exon	643339
PPM1H	NM_020700	-297	promoter	57460
STMND1	NM_001190766	179	promoter	401236
RNF170	NM_001160223	0	inside exon	81790
COX20	NM_198076	475	promoter	116228
CACTIN	NM_001080543	-223	promoter	58509
ZNF821	NM_001201552	0	inside exon	55565
USP16	NM_001001992	0	inside intron	10600
C3orf33	NM_173657	-179	promoter	285315
VGLL4	NM_001128219	0	inside intron	9686
HSD11B2	NM_000196	158	promoter	3291
ZNF142	NM_001105537	0	inside intron	7701
PRMT2	NM_001242864	141	promoter	3275
LMO7	NM_005358	0	inside intron	4008
RNF41	NM_001242826	-307	promoter	10193
LEFTY1	NM_020997	-218	promoter	10637
SPNS2	NM_001124758	0	inside intron	124976
CUX1	NM_001202543	1737	promoter	1523
INO80D	NM_017759	67627	downstream	54891
MRPS30	NM_016640	0	inside intron	10884
CLK2	NM_001291	0	inside intron	1196
ZBED9	NM_052923	-47915	upstream	114821
PDIK1L	NM_001243532	0	inside intron	149420
ACP6	NM_016361	0	inside exon	51205
CYB5R4	NM_016230	68	promoter	51167
MDC1	NM_014641	0	inside exon	9656
GNA13	NM_001282425	-282	promoter	10672
ZNF692	NM_001136036	0	inside intron	55657
ZNF343	NM_001282495	0	inside intron	79175
DDX10	NM_004398	0	inside exon	1662
STK11	NM_000455	11015	upstream	6794
PGR	NM_000926	0	inside exon	5241
OLFM3	NM_001288821	0	inside exon	118427
ZNF322	NM_001242797	-97726	upstream	79692
ARL14EP	NM_152316	0	inside intron	120534
HIST1H4C	NM_003542	0	inside exon	8364
ZNF14	NM_021030	-13	promoter	7561
DAPK1	NM_001288729	0	inside intron	1612
PLEKHG1	NM_001029884	0	inside intron	57480
PI4KB	NM_001198773	0	inside exon	5298
ALS2	NM_001135745	-511	promoter	57679
FAM49B	NM_001256763	0	inside intron	51571
MKL2	NM_014048	-18721	downstream	57496
PABPC1	NM_002568	0	inside intron	26986
ARL8A	NM_001256129	0	inside exon	127829
C4orf19	NM_001104629	190	promoter	55286
NDUFA10	NM_004544	-451	promoter	4705
ABCD3	NM_001122674	397	promoter	5825
NRP1	NM_001024628	-1986	promoter	8829
KDELR2	NM_001100603	-39	promoter	11014
CACNA1C	NM_000719	0	inside exon	775
MRPL19	NM_014763	87	promoter	9801
NXPE3	NM_001134456	172	promoter	91775
TSGA13	NM_001304968	0	inside exon	114960
RAB11FIP4	NM_001303542	-21526	downstream	84440
LZTFL1	NM_001276378	0	inside intron	54585
CFAP221	NM_001029996	173	promoter	200373
EID2B	NM_152361	-15	promoter	126272
LCMT1	NM_001032391	0	inside exon	51451
PTCD2	NM_001284403	0	inside exon	79810
SYT11	NM_152280	0	inside exon	23208
RAF1	NM_002880	0	inside intron	5894
CDK4	NM_000075	-196	promoter	1019
ZKSCAN8	NM_001278119	0	inside intron	7745
IDUA	NM_000203	0	inside intron	3425
ANKRD37	NM_181726	47	promoter	353322
UBXN7	NM_015562	0	inside intron	26043
ST3GAL1	NM_003033	0	inside intron	6482
P4HTM	NM_017732	166	promoter	54681
MIDN	NM_177401	0	inside intron	90007
EPAS1	NM_001430	0	inside intron	2034
ATP6V1G2-DDX39B	NR_037853	0	inside intron	100532737
RALGAPB	NM_001282917	49	promoter	57148
TTC32	NM_001008237	-44	promoter	130502
IGSF21	NM_032880	0	inside intron	84966
EEFSEC	NM_021937	0	inside intron	60678
PPP2R3A	NM_001190447	0	inside exon	5523
ZCCHC11	NM_001009881	-186	promoter	23318
DDX12P	NM_004400	-10865	upstream	440081
KLF10	NM_001032282	0	inside intron	7071
CLUH	NM_015229	-259	promoter	23277
BTG1	NM_001731	0	inside exon	694
RIPPLY2	NM_001009994	0	inside exon	134701
MRTO4	NM_016183	0	inside intron	51154
CELA3A	NM_005747	-13061	downstream	10136
FOXG1	NM_005249	809	promoter	2290
SOGA3	NM_001012279	0	inside exon	387104
AATF	NM_012138	0	inside intron	26574
TLX3	NM_021025	1102	promoter	30012
CALM1	NM_001166106	0	inside intron	801
BTBD10	NM_001297741	0	inside exon	84280
FITM2	NM_001080472	0	inside intron	128486
ADI1	NM_018269	0	inside intron	55256
DGCR6	NM_005675	67	promoter	8214
RANBP1	NM_001278639	28	promoter	5902
KLHDC9	NM_001007255	0	inside exon	126823
NREP	NM_001142474	0	inside intron	9315
CTBP1	NM_001012614	0	inside intron	1487
NIT2	NM_020202	190	promoter	56954
AOC1	NM_001091	-37356	downstream	26
PRICKLE4	NM_013397	0	inside exon	29964
TSPEAR	NM_001272037	0	inside intron	54084
SPIRE1	NM_001128626	-321	promoter	56907
CEP152	NM_001194998	-26	promoter	22995
CFL1	NM_005507	-184	promoter	1072
WNT5A	NM_001256105	-948	promoter	7474
DHTKD1	NM_018706	0	inside exon	55526
ARHGAP10	NM_024605	604	promoter	79658
SOX4	NM_003107	9	promoter	6659
PEX3	NM_003630	0	inside exon	8504
DIS3L2	NM_001257281	93	promoter	129563
EIF4E2	NM_001276336	0	inside intron	9470
GMDS	NM_001253846	-209	promoter	2762
SLC25A12	NM_003705	-180	promoter	8604
WDFY1	NM_020830	0	inside intron	57590
SLC39A14	NM_001128431	0	inside exon	23516
PSMC3	NM_002804	-148	promoter	5702
ZBED3	NM_032367	-136	promoter	84327
H2AFY	NM_001040158	0	inside intron	9555
OLIG2	NM_005806	562	promoter	10215
DROSHA	NM_001100412	0	inside exon	29102
SELO	NM_031454	0	inside intron	83642
HSPB2-C11orf52	NR_037651	0	inside exon	100528019
LOC283335	NR_033854	0	inside intron	283335
ANKFY1	NM_001257999	0	inside intron	51479
LRRC3	NM_030891	514	promoter	81543
BACH1	NM_001011545	301	promoter	571
DCK	NM_000788	178	promoter	1633
SIK2	NM_015191	0	inside intron	23235
FHOD1	NM_013241	0	inside intron	29109
ISLR2	NM_001130136	0	inside exon	57611
FCHO2	NM_001146032	0	inside intron	115548
LRRN1	NM_020873	0	inside exon	57633
PPT2	NM_001204103	0	inside exon	9374
MFSD8	NM_152778	0	inside intron	256471
BLOC1S6	NM_012388	194	promoter	26258
FAM212A	NM_203370	0	inside intron	389119
SERP1	NM_014445	0	inside exon	27230
CXCL2	NM_002089	-281	promoter	2920
KIF9	NM_001134878	0	inside exon	64147
MRPL32	NM_031903	2	promoter	64983
ADAMTS3	NM_014243	-264	promoter	9508
TIAM2	NM_001010927	0	inside intron	26230
FAM73B	NM_032809	676	promoter	84895
LOC440461	NR_027283	-532	close to 3'	440461
MAGI2	NM_001301128	0	inside intron	9863
RXRG	NM_001256570	0	inside exon	6258
RMDN2	NM_001170791	163	promoter	151393
ANKRD52	NM_173595	0	inside exon	283373
YEATS2	NM_018023	123	promoter	55689
GPATCH4	NM_015590	-272	promoter	54865
KAT6B	NM_001256468	0	inside exon	23522
ZBTB46	NM_025224	-24683	upstream	140685
CCDC173	NM_001085447	0	inside exon	129881
TAPBP	NM_003190	0	inside exon	6892
ZBTB16	NM_001018011	420	promoter	7704
KCNC4	NM_001039574	0	inside exon	3749
SMNDC1	NM_005871	0	inside intron	10285
MED27	NM_001253881	-60	promoter	9442
HOXC9	NM_006897	4763	upstream	3225
FSTL5	NM_001128427	-132	promoter	56884
SHH	NM_000193	-127	promoter	6469
ALYREF	NM_005782	0	inside exon	10189
ID4	NM_001546	32197	upstream	3400
MEGF8	NM_001271938	197	promoter	1954
ZDHHC20	NM_001286638	74046	downstream	253832
TTC30B	NM_152517	-44	promoter	150737
CNDP2	NM_001168499	0	inside intron	55748
ZDHHC2	NM_016353	427	promoter	51201
GPX7	NM_015696	0	inside exon	2882
RNF41	NM_001242826	-62	promoter	10193
NOL11	NM_001303272	0	inside exon	25926
PTPRD	NM_001040712	0	inside intron	5789
COG6	NM_001145079	75	promoter	57511
PSMB8	NM_004159	0	inside exon	5696
SPRY1	NM_001258038	-102280	downstream	10252
IDI1	NM_004508	0	inside intron	3422
SUCLA2	NM_003850	0	inside intron	8803
ADSL	NM_000026	130	promoter	158
CD2AP	NM_012120	0	inside intron	23607
TBCA	NM_001297738	-37	promoter	6902
FAM169B	NM_182562	-34191	upstream	283777
NADSYN1	NM_018161	0	inside exon	55191
GNB1	NM_001282538	-446	promoter	2782
RRAGC	NM_001271851	0	inside intron	64121
ERP29	NM_001034025	0	inside intron	10961
CD55	NM_000574	84	promoter	1604
SDF2	NM_006923	0	inside exon	6388
ARRDC4	NM_183376	0	inside intron	91947
STX12	NM_177424	0	inside exon	23673
ZNF436	NM_001077195	0	inside intron	80818
PEX12	NM_000286	-216	promoter	5193
ATAD1	NM_032810	0	inside exon	84896
ZC3H10	NM_001303124	168	promoter	84872
S100P	NM_005980	19955	upstream	6286
PYGL	NM_001163940	0	inside exon	5836
PARP6	NM_020213	-1787	promoter	56965
POLR2H	NM_001278698	387	promoter	5437
NAT10	NM_001144030	0	inside exon	55226
EPHA6	NM_001080448	0	inside exon	285220
ANKEF1	NM_001303472	0	inside exon	63926
HES3	NM_001024598	0	inside exon	390992
JUP	NM_002230	0	inside intron	3728
C1orf123	NM_001304759	0	inside exon	54987
KCNT2	NM_001287819	-144	promoter	343450
NTNG2	NM_032536	200	promoter	84628
UBE2W	NM_001001481	0	inside intron	55284
TATDN2	NM_014760	267	promoter	9797
RBM48	NM_032120	0	inside intron	84060
CCND1	NM_053056	0	inside exon	595
XBP1	NM_001079539	-355	promoter	7494
BUB1B	NM_001211	174	promoter	701
OSGIN2	NM_001126111	0	inside intron	734
DENR	NM_003677	197	promoter	8562
FAT1	NM_005245	0	inside intron	2195
RPTOR	NM_001163034	0	inside intron	57521
RGCC	NM_014059	0	inside exon	28984
SLC22A18AS	NM_001302862	0	inside intron	5003
SPATA7	NM_001040428	0	inside exon	55812
TRIM15	NM_033229	0	inside exon	89870
RAMP1	NM_005855	0	inside intron	10267
ATG101	NM_001098673	390	promoter	60673
MLLT3	NM_001286691	-85	promoter	4300
SLC2A11	NM_001024938	0	inside exon	66035
CAPNS1	NM_001003962	316	promoter	826
ZNF44	NM_001164276	0	inside exon	51710
DCAF6	NM_001017977	0	inside intron	55827
TMEM2	NM_001135820	-198	promoter	23670
UTS2B	NM_198152	0	inside intron	257313
ALKBH6	NM_001297701	-170	promoter	84964
TNRC18	NM_001013722	0	inside intron	84629
SLC26A2	NM_000112	163	promoter	1836
ERCC2	NM_000400	-187	promoter	2068
RBM12	NM_001198838	-276	promoter	10137
DPY19L2P2	NM_182634	-391	promoter	349152
PFKFB3	NM_001145443	0	inside intron	5209
MOCOS	NM_017947	254	promoter	55034
TEX2	NM_001288732	971	downstream	55852
EXOC6	NM_001013848	0	inside intron	54536
ILDR2	NM_199351	0	inside intron	387597
CEP350	NM_014810	63	promoter	9857
ZNF845	NM_138374	0	inside intron	91664
MAN2A1	NM_002372	0	inside intron	4124
POLM	NM_001284330	-95	promoter	27434
RMND5A	NM_022780	0	inside intron	64795
SOGA3	NM_001012279	0	inside intron	387104
TMEM217	NM_001162900	0	inside exon	221468
TESK2	NM_007170	0	inside exon	10420
CHSY1	NM_014918	0	inside exon	22856
PAN3-AS1	NR_029383	0	inside exon	100288730
FANCF	NM_022725	-23	promoter	2188
SFMBT2	NM_001018039	0	inside intron	57713
MYCN	NM_001293228	0	inside intron	4613
SERTAD3	NM_013368	0	inside intron	29946
SORT1	NM_001205228	-223	promoter	6272
ENOPH1	NM_001292017	0	inside intron	58478
TMEM92	NM_001168215	0	inside intron	162461
SLC6A5	NM_004211	0	inside intron	9152
NFYA	NM_002505	0	inside exon	4800
AMFR	NM_001144	0	inside exon	267
GRIN2A	NM_000833	0	inside intron	2903
PSMB9	NM_002800	-34722	downstream	5698
MLEC	NM_001303627	0	inside exon	9761
AASDH	NM_001286668	0	inside exon	132949
BRSK2	NM_001256627	744	promoter	9024
GNAS	NM_000516	0	inside intron	2778
DDIT3	NM_001195053	0	inside intron	1649
C1orf131	NM_001300830	0	inside intron	128061
EDC3	NM_001142443	-417	promoter	80153
OTX2	NM_001270523	0	inside intron	5015
SLAIN1	NM_001040153	0	inside exon	122060
CLTB	NM_001834	-244	promoter	1212
BDNF	NM_001143805	0	inside intron	627
PLEKHO1	NM_001304722	0	inside intron	51177
MEAF6	NM_001270875	0	inside intron	64769
URB1	NM_014825	0	inside exon	9875
CKAP2	NM_001098525	0	inside intron	26586
PIP5K1B	NM_001031687	0	inside intron	8395
ADM	NM_001124	-645	downstream	133
NXPH3	NM_007225	5639	upstream	11248
ALG9	NM_001077690	0	inside exon	79796
LSM1	NM_014462	0	inside exon	27257
UBE2Q2	NM_001145335	0	inside exon	92912
MTRF1L	NM_001114184	0	inside exon	54516
SQSTM1	NM_001142298	0	inside intron	8878
MRPL44	NM_022915	0	inside exon	65080
BHLHE41	NM_030762	0	inside exon	79365
CGRRF1	NM_006568	80	promoter	10668
TCP11L2	NM_001286262	649	promoter	255394
ZNF790	NM_001242800	0	inside intron	388536
ZNF84	NM_001127372	0	inside exon	7637
FANCC	NM_000136	0	inside exon	2176
WDR26	NM_001115113	-597	promoter	80232
WBSCR27	NM_152559	-53	promoter	155368
PRDM14	NM_024504	-708	promoter	63978
MAPKAPK3	NM_001243925	0	inside intron	7867
SRI	NM_001256891	0	inside intron	6717
SRSF1	NM_001078166	-629	promoter	6426
SENP3-EIF4A1	NR_037926	0	inside exon	100533955
ZNF689	NM_138447	0	inside exon	115509
SMURF2	NM_022739	-364	promoter	64750
AK9	NM_001001706	0	inside exon	221264
MED31	NM_016060	-176	promoter	51003
GNB2	NM_005273	40	promoter	2783
ZFP36L1	NM_001244698	0	inside intron	677
ARL16	NM_001040025	0	inside exon	339231
TOB2P1	NR_002936	7670	downstream	222699
CEMP1	NM_001048212	-1188	promoter	752014
FARSB	NM_005687	-131	promoter	10056
CHP1	NM_007236	-2017	downstream	11261
GJB3	NM_001005752	0	inside exon	2707
BBS7	NM_018190	188	downstream	55212
DDX47	NM_016355	99	promoter	51202
MGAT1	NM_001114617	0	inside intron	4245
TAP1	NM_000593	0	inside exon	6890
RNF130	NM_001280801	0	inside intron	55819
FOXP4	NM_001012426	0	inside intron	116113
HNRNPR	NM_001102397	-90	promoter	10236
MPHOSPH8	NM_017520	0	inside intron	54737
SLC7A6OS	NM_032178	0	inside exon	84138
SLC4A1AP	NM_018158	0	inside exon	22950
ASTN1	NM_001286164	0	inside exon	460
TCEA1	NM_006756	-220	promoter	6917
PTH2R	NM_005048	0	inside intron	5746
BSCL2	NM_001122955	0	inside exon	26580
IBTK	NM_001300906	0	inside intron	25998
SEMA4C	NM_017789	-362	promoter	54910
ACBD6	NM_032360	0	inside exon	84320
AKAP8L	NM_001291478	27	downstream	26993
ZNF598	NM_178167	-234	promoter	90850
COPRS	NM_018405	0	inside intron	55352
HPCAL4	NM_001282396	-36	promoter	51440
CDH22	NM_021248	-4130	upstream	64405
NTNG1	NM_001113226	0	inside exon	22854
NOL4	NM_001198546	0	inside intron	8715
GATAD2B	NM_020699	-270	promoter	57459
L3MBTL2	NM_001003689	3	promoter	83746
PRR7	NM_001174101	0	inside intron	80758
SGTA	NM_003021	-253	promoter	6449
NARS2	NM_001243251	-128	promoter	79731
MYDGF	NM_019107	0	inside intron	56005
PPIL4	NM_139126	-204	promoter	85313
IRF1	NM_002198	-1416	promoter	3659
NUDT5	NM_014142	0	inside intron	11164
RP9	NM_203288	0	inside exon	6100
MST1R	NM_001244937	-72	promoter	4486
GOT2	NM_001286220	0	inside intron	2806
ANKZF1	NM_001042410	0	inside exon	55139
TTC38	NM_017931	175	promoter	55020
PINK1	NM_032409	0	inside intron	65018
SPOPL	NM_001001664	316	promoter	339745
DCLRE1C	NM_001033855	0	inside intron	64421
INO80	NM_017553	-302	promoter	54617
FOXC1	NM_001453	484	promoter	2296
SUV39H2	NM_001193424	0	inside exon	79723
ERICH1-AS1	NR_073397	0	inside intron	619343
CAMK2G	NM_001204492	-282	promoter	818
PCGF1	NM_032673	0	inside exon	84759
ZNF774	NM_001004309	88	promoter	342132
NYAP1	NM_173564	779	promoter	222950
RNPC3	NM_017619	159	promoter	55599
MATN1	NM_002379	0	inside intron	4146
LINC00473	NR_026860	0	inside exon	90632
CLP1	NM_001142597	393	promoter	10978
CREB3L1	NM_052854	34094	upstream	90993
CNST	NM_001139459	0	inside intron	163882
PHF7	NM_001278221	0	inside exon	51533
SF3A1	NM_001005409	0	inside intron	10291
RAB11A	NM_001206836	104	promoter	8766
ATP11B	NM_014616	0	inside intron	23200
MTRF1L	NM_001114184	0	inside exon	54516
SLC39A1	NM_001271957	0	inside intron	27173
STXBP1	NM_001032221	0	inside exon	6812
RPS6KB2	NM_001007071	129	promoter	6199
ADRA1A	NM_000680	-1024	promoter	148
KCND2	NM_012281	999	promoter	3751
MCF2L2	NM_015078	-15	promoter	23101
RTTN	NM_173630	0	inside exon	25914
TOP2B	NM_001068	-394	promoter	7155
KLHL12	NM_001303051	0	inside intron	59349
AASDHPPT	NM_015423	0	inside exon	60496
RUFY2	NM_001042417	-207	promoter	55680
TMEM9	NM_001288564	0	inside intron	252839
HRK	NM_003806	-345	promoter	8739
MTFP1	NM_001003704	0	inside exon	51537
RAB6B	NM_016577	-302	promoter	51560
ZC2HC1C	NM_001042430	169	promoter	79696
CEP44	NM_001040157	0	inside intron	80817
RALB	NM_002881	0	inside intron	5899
PEPD	NM_000285	0	inside exon	5184
UBE2J2	NM_058167	0	inside exon	118424
PRICKLE1	NM_001144881	0	inside intron	144165
SOBP	NM_018013	0	inside intron	55084
NRBP2	NM_178564	0	inside intron	340371
GATA6	NM_005257	0	inside exon	2627
EPB41L4B	NM_018424	0	inside intron	54566
PDGFRL	NM_006207	0	inside intron	5157
TAPBP	NM_003190	0	inside exon	6892
AUTS2	NM_001127231	0	inside intron	26053
UBE2E3	NM_001278554	107	promoter	10477
OCIAD1	NM_001079839	56	promoter	54940
CYB5A	NM_001190807	0	inside exon	1528
AGTR1	NM_000685	0	inside intron	185
CXCL3	NM_002090	-185	promoter	2921
SF3B1	NM_001005526	0	inside intron	23451
EDNRB	NM_000115	0	inside intron	1910
BTN2A1	NM_001197233	60	promoter	11120
ERMP1	NM_024896	0	inside exon	79956
IRF2BPL	NM_024496	-4833	upstream	64207
ASB7	NM_024708	0	inside exon	140460
NPR3	NM_000908	129	promoter	4883
MED12L	NM_053002	144	promoter	116931
STC2	NM_003714	-44	promoter	8614
ARPP19	NM_006628	0	inside intron	10776
NR3C1	NM_000176	0	inside intron	2908
NBPF20	NM_001278267	0	inside exon	100288142
C16orf87	NM_001001436	0	inside exon	388272
ZKSCAN7	NM_001288590	177	promoter	55888
HOXD11	NM_021192	0	inside intron	3237
XBP1	NM_001079539	0	inside intron	7494
NDUFA6	NM_002490	-48	promoter	4700
JUP	NM_002230	0	inside intron	3728
MSANTD3	NM_001198805	553	promoter	91283
PHC1	NM_004426	0	inside intron	1911
MAPKAPK5	NM_003668	0	inside intron	8550
DDX21	NM_001256910	49	promoter	9188
POLA2	NM_002689	0	inside exon	23649
AP3M2	NM_001134296	13020	upstream	10947
ACOT7	NM_007274	-169	promoter	11332
GALNT7	NM_017423	0	inside intron	51809
ETAA1	NM_019002	0	inside intron	54465
MAPKAPK2	NM_004759	271	promoter	9261
SHROOM1	NM_001172700	0	inside exon	134549
NEMF	NM_001301732	0	inside intron	9147
ISOC2	NM_001136201	1029	downstream	79763
GBAS	NM_001202469	221	promoter	2631
ERGIC2	NM_016570	0	inside intron	51290
ZBED9	NM_052923	0	inside exon	114821
NDUFA8	NM_014222	0	inside intron	4702
ACVR1C	NM_001111031	0	inside exon	130399
VCAN	NM_001126336	0	inside intron	1462
RSPO1	NM_001038633	0	inside intron	284654
NFIA	NM_001134673	26811	upstream	4774
GPR180	NM_180989	0	inside intron	160897
PTPRA	NM_002836	0	inside intron	5786
KLHL2	NM_001161521	376	promoter	11275
TMEM261	NM_033428	0	inside exon	90871
CA7	NM_001014435	89	promoter	766
BCAR1	NM_001170714	0	inside intron	9564
TMCC2	NM_001242925	0	inside exon	9911
GOLIM4	NM_014498	-154712	upstream	27333
SRP72	NM_001267722	0	inside intron	6731
PIGT	NM_001184728	-10828	downstream	51604
KLF12	NM_007249	0	inside exon	11278
CHRNB2	NM_000748	0	inside exon	1141
HPS4	NM_022081	0	inside intron	89781
NEMF	NM_001301732	-8939	upstream	9147
COL14A1	NM_021110	1207	promoter	7373
CBR4	NM_032783	0	inside intron	84869
FBRS	NM_001105079	672	promoter	64319
ALG9	NM_001077690	0	inside intron	79796
UTP6	NM_018428	0	inside exon	55813
MYH10	NM_001256012	-853	promoter	4628
VDAC1	NM_003374	0	inside intron	7416
PCIF1	NM_022104	475	promoter	63935
YWHAG	NM_012479	-264	promoter	7532
ANKHD1-EIF4EBP3	NM_020690	225	promoter	404734
NAA20	NM_016100	328	promoter	51126
KAT6B	NM_001256468	0	inside exon	23522
AIDA	NM_022831	0	inside intron	64853
NME9	NM_178130	0	inside intron	347736
RFWD2	NM_001001740	0	inside exon	64326
BYSL	NM_004053	0	inside exon	705
COA1	NM_018224	0	inside exon	55744
SCO1	NM_004589	0	inside exon	6341
PSPH	NM_004577	0	inside intron	5723
GRB2	NM_002086	-235	promoter	2885
ARL6	NM_001278293	65	promoter	84100
NENF	NM_013349	0	inside intron	29937
ONECUT2	NM_004852	0	inside intron	9480
SMARCD3	NM_001003801	0	inside intron	6604
EXOC6	NM_001013848	0	inside intron	54536
C2orf73	NM_001100396	167	promoter	129852
AZIN1	NM_001301668	-686	promoter	51582
ARL1	NM_001177	-444	promoter	400
DTYMK	NM_001165031	-463	promoter	1841
ABCG2	NM_001257386	0	inside intron	9429
NR1D1	NM_021724	0	inside intron	9572
GLI2	NM_005270	0	inside exon	2736
TMEM169	NM_001142310	0	inside intron	92691
RPL19	NM_000981	208	promoter	6143
TSPAN5	NM_005723	0	inside intron	10098
NRXN2	NM_015080	0	inside exon	9379
DDX11	NM_001257144	338	promoter	1663
GIN1	NM_017676	0	inside exon	54826
PARL	NM_001037639	-45	promoter	55486
TMEM14B	NM_001127711	0	inside intron	81853
SCAF8	NM_001286188	522	promoter	22828
MICB	NM_001289160	594	promoter	4277
DAW1	NM_178821	0	inside intron	164781
DOHH	NM_001145165	0	inside exon	83475
SLC10A7	NM_001029998	0	inside exon	84068
UBR5	NM_001282873	0	inside exon	51366
ZNF519	NM_145287	0	inside exon	162655
MIS18A	NM_018944	0	inside exon	54069
AP1G1	NM_001030007	0	inside intron	164
TBCCD1	NM_001134415	0	inside exon	55171
XPO7	NM_001100161	329	promoter	23039
CCDC186	NM_018017	-119	promoter	55088
ZFP64	NM_018197	0	inside intron	55734
TMEM105	NM_178520	-15061	upstream	284186
UPF2	NM_015542	0	inside exon	26019
MAF1	NM_032272	55	promoter	84232
MALSU1	NM_138446	190	promoter	115416
NR5A2	NM_001276464	0	inside intron	2494
C2orf69	NM_153689	0	inside intron	205327
SFN	NM_006142	-952	close to 3'	2810
KANSL3	NM_001115016	-154	promoter	55683
COX14	NM_001257133	115	promoter	84987
NEMF	NM_001301732	0	inside intron	9147
GTF3A	NM_002097	117	promoter	2971
YAP1	NM_001130145	142	promoter	10413
PAOX	NM_152911	511	promoter	196743
EIF3E	NM_001568	-52	promoter	3646
ACP6	NM_016361	0	inside exon	51205
PARP4	NM_006437	-28889	upstream	143
CYP51A1	NM_000786	0	inside intron	1595
PCCB	NM_000532	0	inside intron	5096
SLC46A3	NM_001135919	-95	promoter	283537
TRIM27	NM_006510	6611	downstream	5987
ARPC5	NM_001270439	0	inside exon	10092
CEP350	NM_014810	315	promoter	9857
NAA38	NM_032356	0	inside exon	84316
FASN	NM_004104	-411	promoter	2194
REEP1	NM_001164730	0	inside intron	65055
AFF1	NM_001166693	0	inside intron	4299
TM9SF2	NM_004800	0	inside exon	9375
CALM1	NM_001166106	13985	upstream	801
MYLPF	NM_013292	0	inside intron	29895
CCDC58	NM_001017928	-144	promoter	131076
TTC39A	NM_001080494	0	inside exon	22996
MPHOSPH9	NM_022782	0	inside intron	10198
F13A1	NM_000129	0	inside intron	2162
UGT8	NM_001128174	0	inside exon	7368
SPOCK2	NM_001134434	0	inside exon	9806
USP14	NM_001037334	0	inside intron	9097
ZNF579	NM_152600	0	inside intron	163033
KPNA4	NM_002268	-279	promoter	3840
MRPL50	NM_019051	-70	promoter	54534
AKR1D1	NM_001190906	0	inside intron	6718
NPHP3-ACAD11	NR_037804	0	inside exon	100532724
ADRB1	NM_000684	0	inside exon	153
TAF3	NM_031923	0	inside intron	83860
ENHO	NM_198573	0	inside intron	375704
SLC7A7	NM_001126105	-3072	upstream	9056
AP3B1	NM_001271769	0	inside exon	8546
HK2	NM_000189	0	inside intron	3099
KMT2C	NM_021230	0	inside intron	58508
SNX7	NM_015976	0	inside intron	51375
HOXC13	NM_017410	684	promoter	3229
STX12	NM_177424	0	inside intron	23673
VAX2	NM_012476	12495	upstream	25806
HMGA1	NM_002131	12399	upstream	3159
DLD	NM_000108	0	inside intron	1738
GIT2	NM_001135213	-147	promoter	9815
CCDC53	NM_001301107	0	inside intron	51019
MTFP1	NM_001003704	0	inside intron	51537
EIF3G	NM_003755	-128	promoter	8666
CDC73	NM_024529	267	promoter	79577
MESDC1	NM_022566	0	inside exon	59274
MED18	NM_001127350	0	inside exon	54797
SMG7	NM_001174061	42	promoter	9887
DCLRE1C	NM_001033855	0	inside intron	64421
ATG4D	NM_001281504	0	inside exon	84971
RNPC3	NM_017619	0	inside exon	55599
NBPF20	NM_001278267	0	inside intron	100288142
WNT7B	NM_058238	0	inside intron	7477
DCP1A	NM_001290204	-204	promoter	55802
EIF4EBP1	NM_004095	68	promoter	1978
WDR92	NM_001256476	-57	promoter	116143
PPIP5K2	NM_001276277	0	inside exon	23262
FAM20B	NM_014864	0	inside intron	9917
MAPRE2	NM_001143826	0	inside intron	10982
IGF2BP1	NM_001160423	61	promoter	10642
DGCR6L	NM_033257	14916	downstream	85359
MEGF9	NM_001080497	-489	promoter	1955
PPA1	NM_021129	0	inside intron	5464
ARL5A	NM_001037174	-121	promoter	26225
PIP4K2B	NM_003559	-106	promoter	8396
CALCOCO1	NM_001143682	-23877	upstream	57658
PLCL1	NM_006226	188	promoter	5334
GPR26	NM_153442	181	promoter	2849
KCNN2	NM_001278204	384	promoter	3781
RALGPS1	NM_001190728	22	promoter	9649
TPK1	NM_001042482	0	inside intron	27010
ZNF324B	NM_207395	0	inside intron	388569
MANF	NM_006010	0	inside intron	7873
ADCYAP1R1	NM_001118	-81439	downstream	117
ASAP2	NM_001135191	507	promoter	8853
MUT	NM_000255	0	inside intron	4594
BUB1	NM_001278616	-744	promoter	699
COQ7	NM_001190983	-6390	downstream	10229
ZHX3	NM_015035	0	inside intron	23051
SLC7A2	NM_001008539	262	promoter	6542
TMEM53	NM_001300746	0	inside intron	79639
CDH2	NM_001792	0	inside intron	1000
SIRT3	NM_001017524	0	inside intron	23410
TNFRSF21	NM_014452	0	inside exon	27242
TPRN	NM_001128228	-188	promoter	286262
PM20D2	NM_001010853	16	promoter	135293
BACE2	NM_012105	0	inside exon	25825
ACP1	NM_001040649	0	inside intron	52
NAA30	NM_001011713	205	promoter	122830
ELOF1	NM_032377	-190	promoter	84337
MLF1	NM_001130156	9	promoter	4291
NLN	NM_020726	0	inside intron	57486
EIF2B5	NM_003907	0	inside exon	8893
PCNP	NM_020357	0	inside intron	57092
KCNK2	NM_001017424	0	inside intron	3776
COPB2	NM_004766	-218	promoter	9276
CNOT8	NM_001301073	0	inside intron	9337
DONSON	NM_017613	0	inside intron	29980
NTRK2	NM_001007097	0	inside intron	4915
LINC01126	NM_178529	217	promoter	100129726
GPS2	NM_004489	0	inside intron	2874
XPA	NM_000380	-143	promoter	7507
SLC25A29	NM_001039355	0	inside exon	123096
MACROD2	NM_001033087	0	inside exon	140733
GHITM	NM_014394	0	inside intron	27069
ZDHHC16	NM_001287803	50	promoter	84287
HOXA1	NM_005522	-54	promoter	3198
SMAD4	NM_005359	5	promoter	4089
RECQL	NM_002907	0	inside exon	5965
XPNPEP1	NM_001167604	407780	downstream	7511
GABRA1	NM_000806	0	inside exon	2554
PLEKHG2	NM_022835	199	promoter	64857
CASP8AP2	NM_001137667	380	promoter	9994
ATG7	NM_001136031	110	promoter	10533
CAPRIN1	NM_005898	0	inside exon	4076
RAB27A	NM_004580	-557	promoter	5873
CCDC58	NM_001017928	0	inside intron	131076
KCNN2	NM_001278204	0	inside exon	3781
TRIP11	NM_004239	0	inside exon	9321
NR2F2	NM_001145155	0	inside exon	7026
IPO9	NM_018085	74	promoter	55705
DPH2	NM_001039589	146	promoter	1802
DGKH	NM_001204504	0	inside intron	160851
ENTPD6	NM_001114089	0	inside intron	955
KIZ	NM_001163022	0	inside intron	55857
AIG1	NM_001286587	0	inside intron	51390
HSP90B1	NM_003299	0	inside intron	7184
MRPS18A	NM_001193343	0	inside intron	55168
VPS18	NM_020857	0	inside exon	57617
CDH23	NM_001171930	0	inside intron	64072
ACTL6A	NM_004301	0	inside intron	86
GBE1	NM_000158	0	inside intron	2632
NPHP4	NM_001291593	0	inside intron	261734
SLC35A5	NM_017945	0	inside exon	55032
LRRC1	NM_018214	186	promoter	55227
FAM53A	NM_001013622	0	inside intron	152877
PPARGC1A	NM_013261	-467	promoter	10891
HIST1H2AK	NM_003510	700	close to 3'	8330
ZNHIT3	NM_001033577	3832	upstream	9326
PDGFC	NM_016205	0	inside exon	56034
DNAI1	NM_001281428	0	inside exon	27019
EMC7	NM_020154	0	inside exon	56851
DUS3L	NM_001161619	0	inside intron	56931
DHFRL1	NM_001195643	0	inside exon	200895
LCORL	NM_001166139	0	inside intron	254251
POGZ	NM_001194937	0	inside intron	23126
ZBTB37	NM_001122770	35	promoter	84614
RAB3C	NM_138453	751	promoter	115827
CLPTM1L	NM_030782	0	inside exon	81037
TEF	NM_001145398	0	inside intron	7008
SORT1	NM_001205228	-191	promoter	6272
NEU1	NM_000434	-20	promoter	4758
ZNF391	NM_001013719	15	promoter	346157
USP2-AS1	NR_034160	0	inside intron	100499227
SNRPB	NM_003091	-164	promoter	6628
RASL10B	NM_033315	82	promoter	91608
PCED1A	NM_001271168	0	inside exon	64773
LMO4	NM_006769	0	inside exon	8543
TRIB2	NM_021643	0	inside intron	28951
PER2	NM_003894	0	inside intron	8864
YDJC	NM_001017964	-141	promoter	150223
PCBP1-AS1	NR_033872	0	inside intron	400960
HOXD9	NM_014213	0	inside exon	3235
ZWINT	NM_001005413	-91	promoter	11130
FAM64A	NM_001195228	0	inside intron	54478
C9orf43	NM_001278629	0	inside exon	257169
SUPT5H	NM_001111020	154	promoter	6829
TMOD3	NM_014547	45	promoter	29766
ZNF271P	NM_006629	0	inside exon	10778
SLC4A2	NM_001199692	0	inside intron	6522
SCTR	NM_002980	0	inside intron	6344
ZNF8	NM_021089	20	promoter	7554
HIBADH	NM_152740	0	inside intron	11112
ADCK2	NM_052853	0	inside exon	90956
ATP6V1H	NM_015941	0	inside exon	51606
CASKIN2	NM_001142643	-198	promoter	57513
C12orf45	NM_152318	119	promoter	121053
RAET1L	NM_130900	-12205	upstream	154064
ADAMTS2	NM_014244	0	inside exon	9509
SENP3-EIF4A1	NR_037926	0	inside exon	100533955
KIAA1456	NM_001099677	0	inside intron	57604
SCD	NM_005063	176	promoter	6319
TIMM50	NM_001001563	0	inside exon	92609
NEMF	NM_001301732	0	inside intron	9147
METAP1	NM_015143	277	promoter	23173
NEUROG2	NM_024019	-1134	promoter	63973
NUP85	NM_001303276	0	inside exon	79902
IRS1	NM_005544	-405	promoter	3667
TMED4	NM_001303058	-475	promoter	222068
VPS36	NM_001282168	-240	promoter	51028
NDUFV1	NM_001166102	346	promoter	4723
EDRF1	NM_001202438	105	promoter	26098
VPS37D	NM_001077621	197	promoter	155382
BHLHE22	NM_152414	3956	upstream	27319
TMX2-CTNND1	NR_037646	0	inside intron	100528016
RGS17	NM_012419	0	inside intron	26575
ZNF134	NM_003435	392	promoter	7693
PROC	NM_000312	30100	upstream	5624
NPR1	NM_000906	0	inside exon	4881
AP5S1	NM_001204446	0	inside exon	55317
STXBP3	NM_007269	172	promoter	6814
TCF21	NM_003206	0	inside intron	6943
DLD	NM_000108	0	inside intron	1738
MSX1	NM_002448	0	inside intron	4487
IFT74	NM_001099222	0	inside intron	80173
CHURC1-FNTB	NM_001202558	0	inside intron	100529261
CENPE	NM_001286734	0	inside intron	1062
CDK6	NM_001145306	-191	promoter	1021
RPRD2	NM_001297673	0	inside intron	23248
NDUFA2	NM_001185012	0	inside exon	4695
ADAMTS5	NM_007038	-48	promoter	11096
RPS10P7	NR_026667	-19245	downstream	376693
GGCX	NM_000821	0	inside intron	2677
RAPGEF6	NM_001164386	0	inside intron	51735
KIAA0391	NM_001256678	0	inside exon	9692
SNRPA	NM_004596	36	promoter	6626
DACT1	NM_001079520	0	inside intron	51339
GALK2	NM_001001556	48	promoter	2585
RBPMS2	NM_194272	-824	promoter	348093
STK32C	NM_173575	0	inside intron	282974
RBL1	NM_002895	-178	promoter	5933
ADAM10	NM_001110	-105	promoter	102
RFX7	NM_022841	0	inside intron	64864
UBE2J1	NM_016021	0	inside exon	51465
CNRIP1	NM_001111101	0	inside intron	25927
UAP1	NM_003115	129	promoter	6675
MGAT4B	NM_014275	0	inside exon	11282
DOLPP1	NM_001135917	43	promoter	57171
HOXA10	NM_018951	1323	downstream	3206
FAM109A	NM_001177996	0	inside intron	144717
L3MBTL3	NM_001007102	0	inside intron	84456
SRP54	NM_001146282	548	promoter	6729
PIGK	NM_005482	0	inside exon	10026
KIN	NM_012311	0	inside exon	22944
NR2E1	NM_001286102	1378	promoter	7101
ANKDD1A	NM_182703	267	promoter	348094
GK5	NM_001039547	0	inside exon	256356
LRPPRC	NM_133259	-105	promoter	10128
TOR1AIP1	NM_001267578	83	promoter	26092
TCEB3	NM_003198	160	promoter	6924
TRANK1	NM_014831	-149	promoter	9881
JMJD1C-AS1	NM_032903	0	inside exon	84989
LOC100132356	NM_175919	-462	promoter	100132356
FDFT1	NM_001287742	0	inside intron	2222
CA2	NM_000067	0	inside exon	760
KIF2A	NM_001098511	0	inside intron	3796
MNX1	NM_001165255	-8824	upstream	3110
DBNL	NM_001014436	209	promoter	28988
PTPRA	NM_002836	0	inside intron	5786
SCOC	NM_001153446	4042	upstream	60592
ANKRD54	NM_138797	-215	promoter	129138
LOC440311	NR_077061	10089	upstream	440311
RIMBP2	NM_015347	0	inside intron	23504
ERICH1-AS1	NR_073397	-67840	downstream	619343
PJA2	NM_014819	-144	promoter	9867
MAGI3	NM_001142782	303	promoter	260425
ZNF672	NM_024836	53	promoter	79894
SAR1B	NM_001033503	-93	promoter	51128
DDX60L	NM_001012967	0	inside intron	91351
COX5B	NM_001862	0	inside exon	1329
CCDC183	NM_001039374	0	inside intron	84960
RFC3	NM_002915	0	inside intron	5983
ZBTB17	NM_001242884	0	inside intron	7709
UHRF1BP1	NM_017754	636	promoter	54887
PSMB4	NM_002796	0	inside exon	5692
CAPNS1	NM_001003962	0	inside exon	826
GSE1	NM_001134473	55680	upstream	23199
NCAN	NM_004386	106	promoter	1463
NR2F2	NM_001145155	-77495	downstream	7026
C2CD4B	NM_001007595	-226913	upstream	388125
AGPAT5	NM_018361	120	promoter	55326
EN1	NM_001426	-10809	upstream	2019
SRRM1	NM_001303448	591	promoter	10250
ZNHIT1	NM_006349	0	inside exon	10467
DDRGK1	NM_023935	0	inside exon	65992
GAS1	NM_002048	0	inside exon	2619
ABR	NM_001092	0	inside intron	29
FAM134C	NM_178126	0	inside intron	162427
ADAR	NM_001025107	0	inside intron	103
FOXF1	NM_001451	15130	upstream	2294
PHACTR3	NM_001199505	0	inside intron	116154
TATDN1	NM_001146160	0	inside intron	83940
MYNN	NM_001185118	0	inside exon	55892
HOXC13	NM_017410	0	inside exon	3229
MAGOHB	NM_001300739	-72	promoter	55110
RAD23B	NM_001244713	0	inside intron	5887
CNTNAP2	NM_014141	0	inside intron	26047
CLPX	NM_006660	-46	promoter	10845
SEMA5B	NM_001031702	-781	promoter	54437
TXNDC15	NM_024715	0	inside intron	79770
FXR1	NM_001013438	0	inside intron	8087
SLC25A30	NM_001010875	0	inside intron	253512
INPP4B	NM_001101669	0	inside intron	8821
ERCC1	NM_001166049	0	inside intron	2067
GNE	NM_001128227	0	inside intron	10020
LRRC75A-AS1	NM_152350	0	inside intron	125144
ABHD5	NM_016006	402	promoter	51099
MICU2	NM_152726	0	inside exon	221154
MTMR6	NM_004685	0	inside intron	9107
FBXW4	NM_022039	0	inside exon	6468
HOXA11	NM_005523	-387	promoter	3207
MRPL24	NM_024540	-185	promoter	79590
FBXO45	NM_001105573	0	inside exon	200933
PAOX	NM_152911	639	promoter	196743
KIAA1429	NM_015496	0	inside exon	25962
RANBP10	NM_020850	-149	promoter	57610
RCC1	NM_001048194	0	inside intron	1104
HDAC5	NM_001015053	-153	promoter	10014
RAB27A	NM_004580	-235	promoter	5873
HEXIM1	NM_006460	0	inside exon	10614
TUBA1B	NM_006082	-230	promoter	10376
ZNF519	NM_145287	-64	promoter	162655
TCF7L2	NM_001146274	0	inside intron	6934
SLC35F1	NM_001029858	191	promoter	222553
CYP39A1	NM_001278738	0	inside exon	51302
MSRA	NM_001135670	0	inside intron	4482
P4HTM	NM_017732	0	inside exon	54681
IRF2	NM_002199	-454	promoter	3660
PAX2	NM_000278	15095	upstream	5076
E2F6	NM_001278275	0	inside intron	1876
LGALS8	NM_006499	0	inside intron	3964
FAM69A	NM_001006605	-510	promoter	388650
BRPF3	NM_015695	0	inside intron	27154
NUPL2	NM_007342	0	inside intron	11097
R3HDM2	NM_014925	0	inside intron	22864
PIK3IP1	NM_001135911	0	inside exon	113791
SEC31A	NM_001077206	0	inside exon	22872
ZNF763	NM_001012753	0	inside intron	284390
IFFO1	NM_001039670	0	inside exon	25900
KIF3B	NM_004798	0	inside intron	9371
CCND2	NM_001759	1883	promoter	894
KIAA0825	NM_001145678	0	inside intron	285600
ZNF286B	NM_001145045	-162	promoter	729288
MGST3	NM_004528	32798	upstream	4259
SMO	NM_005631	201	promoter	6608
DAAM1	NM_001270520	0	inside intron	23002
ZRANB3	NM_001286568	0	inside exon	84083
ADCYAP1R1	NM_001118	0	inside intron	117
RUNX2	NM_001015051	0	inside intron	860
WARS2	NM_015836	0	inside intron	10352
MIR7-3HG	NM_174947	0	inside intron	284424
SPRY4	NM_001127496	-32257	upstream	81848
KAT6A	NM_001099412	-456	promoter	7994
TSPAN3	NM_001168412	0	inside exon	10099
ARPP19	NM_006628	0	inside intron	10776
RAPGEF6	NM_001164386	0	inside intron	51735
PEX26	NM_001127649	0	inside exon	55670
SFPQ	NM_005066	-439	promoter	6421
RNF141	NM_016422	0	inside intron	50862
NFIB	NM_001190737	0	inside intron	4781
TSPAN13	NM_014399	0	inside exon	27075
HIST2H2BE	NM_003528	0	inside exon	8349
TPR	NM_003292	0	inside exon	7175
NEMF	NM_001301732	0	inside intron	9147
FGF18	NM_003862	0	inside intron	8817
ORMDL1	NM_001128150	0	inside intron	94101
SLK	NM_001304743	0	inside intron	9748
MVD	NM_002461	0	inside exon	4597
PRRT3	NM_207351	-119	promoter	285368
XIRP2	NM_001079810	-33942	downstream	129446
MEX3C	NM_016626	-223	promoter	51320
SRRM4	NM_194286	624	promoter	84530
DSCR3	NM_006052	0	inside exon	10311
RNF139	NM_007218	0	inside intron	11236
TCHP	NM_001143852	180	promoter	84260
GIT2	NM_001135213	0	inside intron	9815
GCH1	NM_000161	0	inside intron	2643
GAPDHS	NM_014364	0	inside exon	26330
FAHD2A	NM_016044	0	inside intron	51011
ELK3	NM_001303511	2	promoter	2004
DERL1	NM_001134671	-154	promoter	79139
AKAP10	NM_007202	-160	promoter	11216
NCAPH	NM_001281710	0	inside intron	23397
OLFM2	NM_001304347	-258	promoter	93145
CD164	NM_001142401	-47	promoter	8763
PSMA1	NM_001143937	0	inside intron	5682
ZNF398	NM_020781	0	inside intron	57541
PTPRN2	NM_002847	0	inside intron	5799
NR3C2	NM_000901	-97	promoter	4306
ING1	NM_001267728	0	inside intron	3621
DEPTOR	NM_001283012	0	inside intron	64798
MPHOSPH10	NM_005791	0	inside exon	10199
ZNF763	NM_001012753	0	inside intron	284390
NBPF20	NM_001278267	0	inside exon	100288142
RBM14-RBM4	NM_001198845	27	promoter	100526737
TBX5	NM_000192	0	inside intron	6910
SDC2	NM_002998	0	inside intron	6383
CACNA1C	NM_000719	0	inside intron	775
STRIP1	NM_001270768	0	inside intron	85369
MTFP1	NM_001003704	0	inside exon	51537
TRPC3	NM_001130698	0	inside intron	7222
ZNF488	NM_153034	0	inside intron	118738
TOR1AIP1	NM_001267578	158	promoter	26092
POLR2I	NM_006233	0	inside intron	5438
ARID5A	NM_006673	141	promoter	10865
THAP7	NM_001008695	0	inside intron	80764
HSPA9	NM_004134	0	inside intron	3313
ZNF774	NM_001004309	0	inside intron	342132
PTK7	NM_001270398	0	inside intron	5754
TOM1	NM_001135729	0	inside intron	10043
TXNDC16	NM_001160047	0	inside exon	57544
ZNF385B	NM_001113397	0	inside intron	151126
JUP	NM_002230	0	inside exon	3728
SIPA1L1	NM_001284245	147091	upstream	26037
PCBP1-AS1	NR_033872	0	inside intron	400960
FAM229B	NM_001033564	0	inside exon	619208
DPYD	NM_000110	-132709	upstream	1806
IMP4	NM_033416	0	inside intron	92856
FDX1L	NM_001031734	-31	promoter	112812
SMAD4	NM_005359	3	promoter	4089
CSMD2	NM_001281956	0	inside intron	114784
C10orf71	NM_001135196	0	inside exon	118461
METTL8	NM_024770	0	inside exon	79828
HOXB13	NM_006361	-4594	upstream	10481
COL14A1	NM_021110	0	inside exon	7373
DMXL1	NM_001290321	0	inside exon	1657
GATA2	NM_001145661	0	inside intron	2624
FBXO36	NM_174899	0	inside intron	130888
ARL6IP5	NM_006407	0	inside exon	10550
TRAP1	NM_001272049	-336	promoter	10131
DDAH2	NM_001303007	0	inside intron	23564
DCLRE1B	NM_022836	0	inside exon	64858
CCDC134	NM_001304797	0	inside exon	79879
TMEM189-UBE2V1	NM_003349	0	inside intron	387522
CD70	NM_001252	0	inside intron	970
ZSCAN12	NM_001039643	0	inside intron	9753
RNF220	NM_018150	0	inside intron	55182
GFI1	NM_001127215	0	inside intron	2672
SIM1	NM_005068	0	inside intron	6492
CTSB	NM_001908	-448	promoter	1508
LRP11	NM_032832	0	inside intron	84918
HMGCS1	NM_001098272	-337	promoter	3157
VGLL4	NM_001128219	0	inside intron	9686
STK19	NM_004197	0	inside exon	8859
CHD1L	NM_001256336	175	promoter	9557
KCNH8	NM_144633	308	promoter	131096
C14orf37	NM_001001872	0	inside intron	145407
KLHL20	NM_014458	142	promoter	27252
DCAF12	NM_015397	-2227	promoter	25853
MAP3K7	NM_003188	-170	promoter	6885
CWC15	NM_016403	0	inside exon	51503
SPATA6	NM_001286238	-141	promoter	54558
TBX15	NM_152380	0	inside intron	6913
FOXD4L1	NM_012184	-3286	downstream	200350
FAM174B	NM_207446	-149	promoter	400451
PARP8	NM_001178055	-122160	downstream	79668
ATP5G1	NM_001002027	0	inside intron	516
TEX9	NM_001286449	207	promoter	374618
WNT5A	NM_001256105	-119	promoter	7474
ZNF264	NM_003417	171	promoter	9422
CRTC1	NM_001098482	0	inside intron	23373
FRYL	NM_001039751	-76	promoter	285527
GNAS	NM_000516	199	promoter	2778
GFRA3	NM_001496	-138	promoter	2676
TMEM222	NM_032125	243	promoter	84065
UBE4B	NM_001105562	0	inside exon	10277
DCAF10	NM_001286810	67	promoter	79269
GPANK1	NM_001199237	0	inside intron	7918
ZNF284	NM_001037813	214	promoter	342909
MEX3B	NM_032246	0	inside exon	84206
ACP6	NM_016361	0	inside exon	51205
KIFC3	NM_001130099	0	inside intron	3801
CCT6B	NM_001193529	0	inside exon	10693
[truncated: 75 more rows]

## Sheet: SCZCGs
Gene official symbol	Gene ID	Differential expression databases
AATK	9625	Wu_2012_under-expression
ABCB8	11194	Huang_2014_under-expression
ABCC4	10257	Huang_2013_under-expression
ABCF2	10061	Huang_2014_under-expression
ABHD12	26090	Huang_2014_under-expression;Wu_2012_under-expression
ABTB1	80325	Huang_2014_under-expression;Wu_2012_under-expression
ACAP2	23527	Huang_2013_under-expression
ACAT2	39	Wu_2012_under-expression
ACER1	125981	Huang_2013_under-expression
ACIN1	22985	Wu_2012_over-expression
ACOX1	51	Huang_2014_under-expression
ACSS1	84532	Huang_2014_over-expression
ACTA2	59	Wu_2012_over-expression
ACVR1B	91	Huang_2013_under-expression
ACVRL1	94	Huang_2013_under-expression
ACYP1	97	Wu_2012_over-expression
ADAM28	10863	Huang_2013_under-expression
ADCY10	55811	Huang_2014_over-expression
ADH6	130	Huang_2013_over-expression
ADPRHL1	113622	Huang_2014_under-expression
AFP	174	Huang_2013_over-expression
AGBL1	123624	Huang_2013_over-expression
AGER	177	Huang_2013_under-expression
AGFG1	3267	Huang_2014_under-expression
AGL	178	Huang_2014_under-expression
AGRP	181	Huang_2013_under-expression
AHSA1	10598	Wu_2012_over-expression
AIF1L	83543	Wu_2012_over-expression
AK4	205	Huang_2014_over-expression
AKAP12	9590	Huang_2013_under-expression
ALDH1A2	8854	Huang_2013_under-expression
ALDH1A3	220	Huang_2014_under-expression
ALDH1L1	10840	Wu_2012_over-expression
ALDH3A1	218	Huang_2014_under-expression
ALDOA	226	Wu_2012_under-expression
ALDOAP2	228	Wu_2012_under-expression
ALDOC	230	Wu_2012_over-expression
ALG13	79868	Huang_2014_under-expression
ALG14	199857	Huang_2014_under-expression
ALG3	10195	Huang_2014_under-expression
ALKBH2	121642	Huang_2014_over-expression
ALOXE3	59344	Huang_2014_under-expression
ALPK3	57538	Huang_2013_over-expression
ANAPC10P1	729198	Wu_2012_under-expression
ANGEL1	23357	Huang_2014_under-expression;Huang_2013_over-expression
ANGPTL2	23452	Wu_2012_under-expression
ANGPTL4	51129	Wu_2012_under-expression
ANGPTL6	83854	Wu_2012_under-expression
ANKDD1B	728780	Huang_2014_over-expression
ANKRD46	157567	Huang_2014_over-expression
ANKRD65	441869	Huang_2014_under-expression
ANKRD9	122416	Wu_2012_under-expression
ANP32B	10541	Wu_2012_over-expression
ANXA2P1	303	Wu_2012_over-expression
ANXA6	309	Wu_2012_under-expression
ANXA8L1	728113	Wu_2012_over-expression
AP3S2	10239	Huang_2014_under-expression
APEX1	328	Huang_2014_under-expression;Wu_2012_under-expression
APITD1-CORT	100526739	Huang_2014_under-expression
APOD	347	Wu_2012_under-expression
APOE	348	Wu_2012_over-expression
APOL6	80830	Huang_2013_under-expression
APOM	55937	Wu_2012_under-expression
APP	351	Wu_2012_over-expression
APTX	54840	Huang_2014_over-expression
AQP10	89872	Huang_2013_under-expression
AQP11	282679	Huang_2013_under-expression
ARAF	369	Huang_2014_over-expression
ARC	23237	Wu_2012_under-expression
ARGLU1	55082	Wu_2012_over-expression
ARHGAP1	392	Huang_2014_under-expression
ARHGAP19	84986	Wu_2012_over-expression
ARHGAP22-IT1	100689073	Huang_2013_over-expression
ARHGAP36	158763	Huang_2014_under-expression;Huang_2013_under-expression
ARHGAP9	64333	Wu_2012_over-expression
ARHGEF12	23365	Huang_2013_under-expression
ARHGEF1	9138	Huang_2014_over-expression
ARHGEF38	54848	Huang_2014_under-expression
ARHGEF7	8874	Huang_2014_under-expression
ARID5B	84159	Huang_2013_over-expression
ARL17B	100506084	Huang_2014_over-expression
ARMC3	219681	Huang_2014_over-expression
ARNT	405	Huang_2013_under-expression
ARSA	410	Huang_2014_under-expression
ARSB	411	Huang_2013_under-expression
ARTN	9048	Huang_2014_under-expression
ASB11	140456	Huang_2013_under-expression
ASB13	79754	Wu_2012_under-expression
ASB9	140462	Huang_2014_under-expression
ASCC2	84164	Huang_2013_under-expression
ASCL5	647219	Huang_2014_under-expression
ASGR2	433	Huang_2014_under-expression
ASMTL	8623	Huang_2013_over-expression
ASTE1	28990	Wu_2012_under-expression
ATE1	11101	Huang_2013_over-expression
ATF3	467	Huang_2014_under-expression;Huang_2013_under-expression
ATP13A2	23400	Wu_2012_under-expression
ATP1A1	476	Wu_2012_under-expression
ATP1A3	478	Wu_2012_under-expression
ATP1B1	481	Wu_2012_under-expression
ATP1B3	483	Wu_2012_under-expression
ATP2B2	491	Wu_2012_under-expression
ATP2B3	492	Huang_2013_under-expression
ATP5A1	498	Wu_2012_under-expression
ATP5B	506	Wu_2012_under-expression
ATP5C1	509	Wu_2012_under-expression
ATP5D	513	Wu_2012_under-expression
ATP5EP2	432369	Wu_2012_under-expression
ATP5G3	518	Wu_2012_under-expression
ATP5I	521	Wu_2012_over-expression
ATP5SL	55101	Huang_2014_under-expression
ATP6V0A1	535	Wu_2012_under-expression
ATP6V1B2	526	Wu_2012_under-expression
ATPAF1	64756	Huang_2014_under-expression
ATPIF1	93974	Wu_2012_over-expression
ATXN7L1	222255	Huang_2013_over-expression
AURKAPS1	6791	Wu_2012_over-expression
AXIN2	8313	Huang_2013_under-expression
B3GALT1	8708	Huang_2013_over-expression
B3GNT2	10678	Huang_2013_over-expression
B3GNT8	374907	Wu_2012_under-expression
B4GALT1	2683	Huang_2013_under-expression
BAALC	79870	Wu_2012_under-expression
BAG3	9531	Huang_2013_under-expression;Wu_2012_over-expression
BAG6	7917	Huang_2014_under-expression
BAIAP2	10458	Huang_2014_over-expression
BAIAP3	8938	Wu_2012_over-expression
BARD1	580	Huang_2014_under-expression
BBS9	27241	Huang_2014_under-expression
BCAS1	8537	Wu_2012_over-expression
BCKDHB	594	Huang_2013_under-expression
BCKDK	10295	Huang_2014_under-expression
BET1L	51272	Wu_2012_under-expression
BEX1	55859	Wu_2012_over-expression
BHLHB9	80823	Huang_2014_under-expression
BICD1	636	Huang_2014_over-expression
BLCAP	10904	Huang_2014_over-expression
BLOC1S1	2647	Wu_2012_over-expression
BMP1	649	Huang_2013_under-expression
BMP4	652	Huang_2014_under-expression
BMPR1B	658	Huang_2013_under-expression
BTD	686	Huang_2014_under-expression
BTG2	7832	Wu_2012_under-expression
BTLA	151888	Huang_2014_over-expression
BTN3A2	11118	Huang_2013_over-expression
C10orf10	11067	Huang_2013_under-expression;Wu_2012_over-expression
C10orf105	414152	Wu_2012_over-expression
C10orf111	221060	Wu_2012_over-expression
C10orf54	64115	Wu_2012_over-expression
C10orf91	170393	Wu_2012_under-expression
C11orf40	143501	Huang_2013_over-expression
C11orf49	79096	Wu_2012_under-expression
C11orf96	387763	Wu_2012_under-expression
C12orf42	374470	Huang_2013_under-expression
C12orf65	91574	Huang_2013_over-expression
C14orf178	283579	Wu_2012_over-expression
C14orf79	122616	Huang_2014_under-expression
C15orf62	643338	Wu_2012_over-expression
C16orf59	80178	Huang_2014_under-expression
C16orf92	146378	Wu_2012_over-expression
C17orf100	388327	Huang_2014_under-expression
C17orf107	100130311	Wu_2012_under-expression
C18orf32	497661	Wu_2012_under-expression
C19orf33	64073	Huang_2014_over-expression
C19orf68	374920	Wu_2012_over-expression
C19orf71	100128569	Wu_2012_over-expression
C1orf122	127687	Wu_2012_under-expression
C1orf134	574037	Wu_2012_over-expression
C1orf159	54991	Huang_2014_under-expression
C1orf167	284498	Wu_2012_over-expression
C1QL3	389941	Wu_2012_over-expression
C1QTNF4	114900	Wu_2012_under-expression
C22orf15	150248	Wu_2012_over-expression
C22orf24	25775	Wu_2012_over-expression
C2orf82	389084	Wu_2012_under-expression
C3orf49	132200	Wu_2012_under-expression
C3orf79	152118	Huang_2013_over-expression
C4orf36	132989	Huang_2013_under-expression
C5orf45	51149	Wu_2012_under-expression
C5orf47	133491	Huang_2013_under-expression
C6orf136	221545	Huang_2014_under-expression
C6orf223	221416	Huang_2013_over-expression
C8orf33	65265	Huang_2014_under-expression
C8orf58	541565	Huang_2014_under-expression
C9orf16	79095	Wu_2012_under-expression
C9orf50	375759	Wu_2012_under-expression
CA9	768	Huang_2014_under-expression
CABP1	9478	Huang_2014_under-expression;Wu_2012_under-expression
CABP7	164633	Wu_2012_over-expression
CACNA1F	778	Huang_2014_over-expression
CACNA1G	8913	Huang_2014_under-expression
CACNA2D4	93589	Huang_2014_under-expression
CACNB1	782	Wu_2012_under-expression
CACNG7	59284	Wu_2012_under-expression
CACYBP	27101	Wu_2012_over-expression
CALM2	805	Wu_2012_under-expression
CALM3	808	Wu_2012_over-expression
CALR3	125972	Wu_2012_over-expression
CALR	811	Wu_2012_over-expression
CALU	813	Huang_2014_under-expression
CAMK1	8536	Huang_2013_under-expression
CAMK2B	816	Huang_2014_over-expression
CAMTA2	23125	Huang_2014_under-expression
CAPG	822	Huang_2013_under-expression
CAPN12	147968	Wu_2012_over-expression
CAPN1	823	Huang_2014_under-expression
CAPRIN2	65981	Huang_2013_under-expression
CARTPT	9607	Wu_2012_over-expression
CASC5	57082	Huang_2013_under-expression
CASP1	834	Huang_2014_over-expression
CATSPERG	57828	Huang_2014_over-expression;Huang_2013_under-expression
CBWD1	55871	Huang_2014_under-expression
CBY3	646019	Huang_2014_over-expression
CCDC102B	79839	Huang_2013_under-expression
CCDC121	79635	Wu_2012_over-expression
CCDC150	284992	Huang_2013_under-expression
CCDC152	100129792	Wu_2012_under-expression
CCDC36	339834	Wu_2012_under-expression
CCDC43	124808	Huang_2014_over-expression
CCDC50	152137	Huang_2014_under-expression
CCDC63	160762	Huang_2013_under-expression
CCDC65	85478	Huang_2013_over-expression
CCDC74A	90557	Huang_2014_under-expression
CCDC80	151887	Huang_2013_under-expression
CCK	885	Wu_2012_under-expression
CCL13	6357	Huang_2013_over-expression
CCL25	6370	Wu_2012_over-expression
CCL4	6351	Huang_2013_under-expression
CCNI	10983	Wu_2012_under-expression
CCR2	729230	Huang_2013_under-expression
CCZ1B	221960	Huang_2014_under-expression
CD14	929	Huang_2013_under-expression
CD22	933	Huang_2014_under-expression
CD320	51293	Wu_2012_under-expression
CD52	1043	Wu_2012_under-expression
CD63	967	Wu_2012_over-expression
CD68	968	Wu_2012_under-expression
CD72	971	Wu_2012_over-expression
CD74	972	Wu_2012_under-expression
CD86	942	Huang_2013_under-expression
CD93	22918	Huang_2013_under-expression
CD99L2	83692	Wu_2012_under-expression
CDC14A	8556	Huang_2013_under-expression
CDC20B	166979	Huang_2013_under-expression
CDC25A	993	Huang_2014_under-expression
CDC42EP2	10435	Huang_2014_under-expression
CDCA4	55038	Huang_2014_over-expression
CDH26	60437	Huang_2013_under-expression
CDK12	51755	Huang_2014_under-expression
CDK15	65061	Huang_2013_under-expression
CDK16	5127	Huang_2014_over-expression
CDKL5	6792	Huang_2013_under-expression
CDKN1A	1026	Wu_2012_over-expression
CDKN2A	1029	Huang_2014_over-expression
CDNF	441549	Wu_2012_under-expression
CDRT15	146822	Huang_2014_over-expression
CDRT15L2	256223	Huang_2013_under-expression
CDX1	1044	Huang_2014_under-expression
CEACAM3	1084	Huang_2014_under-expression
CEP112	201134	Huang_2014_over-expression
CEP128	145508	Huang_2013_over-expression
CER1	9350	Huang_2013_under-expression
CFDP1	10428	Wu_2012_over-expression
CHAC2	494143	Wu_2012_under-expression
CHGA	1113	Wu_2012_under-expression
CHID1	66005	Huang_2014_under-expression
CHMP2A	27243	Wu_2012_over-expression
CHMP4A	29082	Wu_2012_over-expression
CHN1	1123	Wu_2012_under-expression
CHRM2	1129	Huang_2013_over-expression
CHRNE	1145	Wu_2012_under-expression
CHST3	9469	Huang_2013_under-expression
CIB2	10518	Huang_2014_under-expression
CITED1	4435	Huang_2014_under-expression
CITED2	10370	Wu_2012_under-expression
CIZ1	25792	Wu_2012_over-expression
CKB	1152	Wu_2012_under-expression
CKM	1158	Huang_2013_under-expression
CKS2	1164	Wu_2012_under-expression
CLDN11	5010	Wu_2012_under-expression
CLDN20	49861	Wu_2012_over-expression
CLDN22	53842	Wu_2012_under-expression
CLDN7	1366	Wu_2012_over-expression
CLDN8	9073	Huang_2013_under-expression
CLDND1	56650	Huang_2013_under-expression;Wu_2012_under-expression
CLIC5	53405	Huang_2014_under-expression
CLIC6	54102	Huang_2013_under-expression
CLIP3	25999	Wu_2012_under-expression
CLMN	79789	Huang_2013_over-expression
CLPB	81570	Huang_2014_over-expression
CLPTM1	1209	Wu_2012_under-expression
CLRN1	7401	Huang_2013_under-expression
CLTC	1213	Wu_2012_under-expression
CLU	1191	Wu_2012_over-expression
CMC1	152100	Huang_2014_under-expression
CMPK2	129607	Huang_2014_over-expression
CNDP1	84735	Wu_2012_under-expression
CNEP1R1	255919	Huang_2014_over-expression
CNGB3	54714	Huang_2014_under-expression
CNIH4	29097	Huang_2014_under-expression
CNP	1267	Wu_2012_under-expression
COCH	1690	Huang_2013_under-expression
COL20A1	57642	Huang_2013_under-expression
COPS7A	50813	Huang_2014_under-expression
CORO2B	10391	Huang_2014_under-expression
COX10	1352	Huang_2014_under-expression
COX4I1	1327	Wu_2012_over-expression
COX5A	9377	Huang_2014_under-expression;Wu_2012_under-expression
COX6C	1345	Wu_2012_under-expression
COX7A2	1347	Wu_2012_under-expression
COX7C	1350	Wu_2012_under-expression
COX8A	1351	Wu_2012_under-expression
CPLX1	10815	Wu_2012_under-expression
CPLX2	10814	Wu_2012_over-expression
CPSF3L	54973	Huang_2013_over-expression
CPT1B	1375	Huang_2014_over-expression
CR1L	1379	Huang_2014_under-expression
CREB3L2	64764	Huang_2013_under-expression
CREM	1390	Huang_2014_under-expression
CRYAB	1410	Wu_2012_over-expression
CSNK1G2	1455	Huang_2013_under-expression
CSNK1G3	1456	Huang_2014_over-expression
CSNK2B	1460	Huang_2014_under-expression
CTNNA3	29119	Wu_2012_over-expression
CTNNBIP1	56998	Huang_2014_under-expression
CTSD	1509	Wu_2012_under-expression
CTSF	8722	Wu_2012_under-expression
CXCL14	9547	Wu_2012_under-expression
CXCR6	10663	Huang_2013_under-expression
CYLD	1540	Huang_2013_over-expression
CYP2A6	1548	Huang_2013_under-expression
CYP4B1	1580	Huang_2013_over-expression
CYP7A1	1581	Huang_2013_under-expression
CYR61	3491	Wu_2012_under-expression
CYSLTR1	10800	Huang_2014_under-expression
CYTH2	9266	Huang_2014_over-expression
CYTIP	9595	Huang_2014_under-expression
DAPL1	92196	Huang_2014_under-expression
DAZAP2	9802	Wu_2012_under-expression
DBNDD1	79007	Huang_2014_under-expression
DCLK1	9201	Wu_2012_under-expression
DCP1B	196513	Huang_2014_under-expression
DCTN4	51164	Huang_2014_under-expression
DCUN1D2	55208	Huang_2014_under-expression
DDIT4	54541	Wu_2012_over-expression
DDN	23109	Wu_2012_over-expression
DEFA4	1669	Huang_2013_under-expression
DENND1B	163486	Wu_2012_over-expression
DENND3	22898	Huang_2013_under-expression
DEPDC4	120863	Wu_2012_under-expression
DERL3	91319	Wu_2012_over-expression
DGAT1	8694	Huang_2014_under-expression
DHRS7	51635	Huang_2013_over-expression
DHRS7B	25979	Huang_2014_under-expression
DIXDC1	85458	Huang_2014_under-expression
DKFZP434A062	26102	Huang_2013_under-expression
DLEC1	9940	Huang_2013_over-expression;Wu_2012_over-expression
DLG2	1740	Wu_2012_over-expression
DLK1	8788	Huang_2014_over-expression
DLL3	10683	Huang_2013_under-expression
DLL4	54567	Huang_2013_over-expression
DMD	1756	Huang_2014_over-expression
DMRT3	58524	Huang_2013_under-expression
DNAAF1	123872	Huang_2013_under-expression
DNAH2	146754	Huang_2013_under-expression
DNAJA1	3301	Wu_2012_over-expression
DNAJA4	55466	Wu_2012_over-expression
DNAJB1	3337	Wu_2012_over-expression
DNAJB2	3300	Wu_2012_over-expression
DNAJC10	54431	Huang_2014_under-expression
DNAL4	10126	Wu_2012_over-expression
DNALI1	7802	Huang_2013_over-expression
DNASE2B	58511	Huang_2014_over-expression
DNM1	1759	Huang_2014_under-expression;Wu_2012_under-expression
DNM2	1785	Huang_2014_over-expression
DNM3OS	100628315	Huang_2014_over-expression
DNPEP	23549	Huang_2013_over-expression
DOCK5	80005	Huang_2013_over-expression
DOCK7	85440	Huang_2014_over-expression
DPEP3	64180	Huang_2014_over-expression
DPP3	10072	Huang_2014_over-expression
DPP4	1803	Huang_2013_under-expression
DRAP1	10589	Wu_2012_over-expression
DRD2	1813	Huang_2014_under-expression
DST	667	Huang_2013_under-expression
DSTN	11034	Wu_2012_under-expression
DTNBP1	84062	Huang_2014_under-expression
DUSP1	1843	Wu_2012_under-expression
DUSP19	142679	Huang_2013_under-expression
DUSP5	1847	Wu_2012_under-expression
DYNC1LI2	1783	Wu_2012_over-expression
DYNLL1	8655	Wu_2012_over-expression
DYNLL1P1	246720	Wu_2012_over-expression
DYNLRB1	83658	Wu_2012_over-expression
DYRK1B	9149	Huang_2014_under-expression
ECE2	9718	Huang_2014_over-expression
EDF1	8721	Wu_2012_over-expression
EDN3	1908	Huang_2013_over-expression
EED	8726	Huang_2013_under-expression
EEF1A1P5	158078	Wu_2012_over-expression
EEF1D	1936	Wu_2012_over-expression
EFTUD2	9343	Huang_2014_under-expression
EGFL7	51162	Wu_2012_under-expression
EGR1	1958	Wu_2012_under-expression
EGR4	1961	Huang_2013_under-expression;Wu_2012_under-expression
EHMT2	10919	Huang_2014_over-expression
EIF1B	10289	Wu_2012_under-expression
EIF4BP6	645579	Wu_2012_over-expression
EIF4ENIF1	56478	Huang_2014_under-expression
ELN	2006	Huang_2014_under-expression
ELOVL1	64834	Wu_2012_under-expression
EML2	24139	Huang_2014_under-expression
EML3	256364	Huang_2013_over-expression
EMX2OS	196047	Huang_2013_under-expression
ENC1	8507	Wu_2012_over-expression
ENPP1	5167	Huang_2013_over-expression
EP400NL	347918	Huang_2013_under-expression
EPC1	80314	Huang_2014_under-expression
EPHB2	2048	Huang_2013_under-expression
EPHB6	2051	Wu_2012_under-expression
EPO	2056	Huang_2014_under-expression
ESRP1	54845	Huang_2014_under-expression;Huang_2013_under-expression
ESRRA	2101	Wu_2012_under-expression
ETFB	2109	Wu_2012_over-expression
ETV6	2120	Huang_2013_under-expression
EVC	2121	Huang_2013_over-expression;Wu_2012_under-expression
EVI2A	2123	Wu_2012_under-expression
EVI2B	2124	Wu_2012_over-expression
EXOSC3	51010	Huang_2014_over-expression
EXTL2	2135	Wu_2012_under-expression
F11	2160	Huang_2013_under-expression
F2RL1	2150	Huang_2013_under-expression
F2RL2	2151	Huang_2013_under-expression
F7	2155	Huang_2013_under-expression
F8	2157	Huang_2014_under-expression
F8A1	8263	Huang_2014_under-expression
FA2H	79152	Wu_2012_under-expression
FABP7	2173	Wu_2012_over-expression
FAM107A	11170	Wu_2012_over-expression
FAM107B	83641	Huang_2014_over-expression
FAM122C	159091	Huang_2013_under-expression
FAM127C	441518	Wu_2012_under-expression
FAM132A	388581	Huang_2013_under-expression
FAM166A	401565	Wu_2012_over-expression
FAM173B	134145	Huang_2014_under-expression
FAM19A3	284467	Huang_2014_under-expression
FAM19A4	151647	Huang_2014_under-expression
FAM200A	221786	Wu_2012_under-expression
FAM209B	388799	Huang_2014_under-expression
FAM217A	222826	Huang_2014_under-expression
FAM221B	392307	Huang_2014_over-expression
FAM3B	54097	Huang_2013_over-expression
FAM69C	125704	Huang_2013_under-expression
FAM71E1	112703	Huang_2014_under-expression;Wu_2012_under-expression
FAM71F2	346653	Huang_2014_over-expression
FAM84A	151354	Huang_2013_under-expression
FAM89B	23625	Huang_2014_under-expression
FAM9B	171483	Huang_2013_under-expression
FANK1	92565	Huang_2013_under-expression
FAU	2197	Wu_2012_over-expression
FBN3	84467	Wu_2012_under-expression
FBXL15	79176	Wu_2012_under-expression
FBXL19	54620	Huang_2014_under-expression
FBXL6	26233	Huang_2013_under-expression
FBXO2	26232	Wu_2012_over-expression
FBXO9	26268	Wu_2012_under-expression
FCGR3A	2214	Huang_2013_under-expression
FCGR3B	2215	Huang_2013_under-expression
FCRL4	83417	Huang_2013_under-expression
FEV	54738	Huang_2014_under-expression
FEZ1	9638	Wu_2012_under-expression
FGD2	221472	Huang_2013_over-expression;Wu_2012_under-expression
FGD3	89846	Huang_2014_under-expression
FGF1	2246	Huang_2014_over-expression;Wu_2012_over-expression
FGL1	2267	Huang_2014_over-expression
FIBCD1	84929	Huang_2013_under-expression
FIGN	55137	Huang_2013_under-expression
FKBP4	2288	Wu_2012_over-expression
FLT3	2322	Huang_2014_under-expression
FLVCR2	55640	Huang_2013_under-expression
FMO5	2330	Wu_2012_under-expression
FMO6P	388714	Huang_2013_under-expression
FN1	2335	Huang_2014_under-expression
FNBP4	23360	Huang_2013_under-expression
FNDC4	64838	Huang_2014_under-expression;Wu_2012_under-expression
FOS	2353	Wu_2012_under-expression
FOSB	2354	Wu_2012_under-expression
FOXA1	3169	Huang_2013_under-expression
FOXD4L3	286380	Huang_2014_over-expression
FOXH1	8928	Wu_2012_over-expression
FOXN3	1112	Huang_2014_under-expression
FOXO4	4303	Wu_2012_over-expression
FREM1	158326	Huang_2013_under-expression
FRMPD2	143162	Huang_2013_over-expression
FSCN1	6624	Wu_2012_under-expression
FTCD	10841	Huang_2013_under-expression
FTH1P15	2507	Wu_2012_over-expression
FTH1P3	2498	Wu_2012_over-expression
FTH1P8	2501	Wu_2012_over-expression
FTL	2512	Wu_2012_over-expression
FUS	2521	Wu_2012_over-expression
FUT4	2526	Huang_2013_under-expression
FUZ	80199	Wu_2012_under-expression
FXYD1	5348	Wu_2012_over-expression
FXYD7	53822	Wu_2012_under-expression
FYB	2533	Huang_2013_under-expression
FZD9	8326	Huang_2013_under-expression
G0S2	50486	Wu_2012_over-expression
GAA	2548	Huang_2014_under-expression
GAB1	2549	Huang_2013_under-expression
GAB2	9846	Wu_2012_over-expression
GABARAPL2	11345	Wu_2012_under-expression
GABRA5	2558	Wu_2012_over-expression
GABRD	2563	Wu_2012_under-expression
GABRG3	2567	Huang_2014_under-expression
GAD1	2571	Wu_2012_under-expression
GADD45G	10912	Wu_2012_under-expression
GAP43	2596	Wu_2012_over-expression
GAPDHP42	100240707	Wu_2012_over-expression
GAPDHP71	2613	Wu_2012_under-expression
GAPDHP72	346085	Wu_2012_under-expression
GAS2	2620	Huang_2014_over-expression
GBGT1	26301	Huang_2014_under-expression
GDF1	2657	Wu_2012_under-expression
GDF15	9518	Wu_2012_over-expression
GFAP	2670	Wu_2012_over-expression
GFRA2	2675	Huang_2014_under-expression
GGA2	23062	Huang_2013_under-expression
GHRH	2691	Huang_2014_under-expression
GIMAP7	168537	Huang_2014_over-expression
GIPC1	10755	Huang_2014_under-expression
GIPC3	126326	Wu_2012_under-expression
GJC2	57165	Huang_2013_over-expression
GLA	2717	Huang_2014_under-expression;Wu_2012_under-expression
GLIPR1L1	256710	Huang_2014_over-expression
GLRA4	441509	Huang_2014_under-expression
GLS	2744	Huang_2013_over-expression
GLUL	2752	Wu_2012_over-expression
GMEB2	26205	Huang_2014_under-expression
GMPPB	29925	Wu_2012_under-expression
GNAL	2774	Huang_2014_under-expression
GNG12	55970	Huang_2013_under-expression
GNG13	51764	Wu_2012_under-expression
GNG3	2785	Wu_2012_under-expression
GNGT2	2793	Huang_2014_under-expression
GOLGA7	51125	Huang_2014_under-expression
GOT1	2805	Wu_2012_under-expression
GP1BB	2812	Wu_2012_under-expression
GPHA2	170589	Wu_2012_over-expression
GPN3	51184	Huang_2014_under-expression
GPR160	26996	Huang_2013_under-expression
GPR161	23432	Huang_2014_under-expression
GPR21	2844	Wu_2012_over-expression
GPR45	11250	Huang_2013_over-expression
GPR52	9293	Wu_2012_over-expression
GPRIN2	9721	Huang_2014_under-expression
GPT	2875	Wu_2012_over-expression
GPX3	2878	Wu_2012_under-expression
GRAPL	400581	Huang_2014_under-expression
GRIK1-AS1	642976	Wu_2012_over-expression
GRIN3B	116444	Wu_2012_under-expression
GRINA	2907	Huang_2014_under-expression;Wu_2012_under-expression
GRM1	2911	Huang_2014_over-expression
GRN	2896	Huang_2014_under-expression
GRP	2922	Huang_2014_over-expression
GRTP1	79774	Huang_2013_under-expression
GSG1	83445	Huang_2013_over-expression
GSG2	83903	Wu_2012_over-expression
GTF3C3	9330	Huang_2013_under-expression
GZF1	64412	Wu_2012_under-expression
GZMM	3004	Huang_2014_under-expression
H2AFZ	3015	Wu_2012_under-expression
HAPLN4	404037	Wu_2012_under-expression
HARS2	23438	Huang_2014_over-expression
HAS3	3038	Wu_2012_under-expression
HCN4	10021	Huang_2013_under-expression
HCRP1	387535	Huang_2013_under-expression
HCRTR1	3061	Wu_2012_under-expression
HEPN1	641654	Wu_2012_under-expression
HES4	57801	Wu_2012_under-expression
HES6	55502	Huang_2013_under-expression;Wu_2012_under-expression
HFE	3077	Huang_2013_over-expression
HHIP	64399	Huang_2013_under-expression
HHIPL1	84439	Huang_2014_under-expression
HHLA3	11147	Huang_2014_over-expression
HIGD2A	192286	Wu_2012_under-expression
HINT1	3094	Wu_2012_under-expression
HIPK2	28996	Wu_2012_over-expression
HIST1H4B	8366	Huang_2014_under-expression
HIST1H4H	8365	Huang_2014_over-expression
HIST2H3A	333932	Wu_2012_over-expression
HK3	3101	Wu_2012_over-expression
HLA-DPA1	3113	Huang_2013_under-expression
HLA-DQB1	3119	Huang_2013_under-expression
HLA-DRA	3122	Huang_2013_under-expression
HMG20B	10362	Wu_2012_under-expression
HMGB2	3148	Huang_2013_under-expression
HMGN2P8	100288691	Wu_2012_over-expression
HNRNPA2B1	3181	Wu_2012_over-expression
HNRNPH3	3189	Wu_2012_over-expression
HNRNPM	4670	Wu_2012_over-expression
HOXB7	3217	Huang_2013_over-expression
HPCAL1	3241	Wu_2012_over-expression
HR	55806	Huang_2014_under-expression;Wu_2012_under-expression
HRAS	3265	Wu_2012_over-expression
HS3ST3B1	9953	Huang_2013_under-expression
HSH2D	84941	Wu_2012_over-expression
HSP90AA1	3320	Wu_2012_over-expression
HSP90AA4P	3323	Wu_2012_over-expression
HSP90AB1	3326	Wu_2012_over-expression
HSPA1A	3303	Wu_2012_over-expression
HSPA6	3310	Wu_2012_over-expression
HSPB1	3315	Wu_2012_over-expression
HSPB2	3316	Wu_2012_under-expression
HSPD1	3329	Wu_2012_over-expression
HSPE1	3336	Wu_2012_over-expression
HSPH1	10808	Wu_2012_over-expression
HTATIP2	10553	Huang_2014_under-expression
HUWE1	10075	Huang_2013_under-expression
HYDIN	54768	Huang_2014_under-expression
IDO1	3620	Huang_2013_under-expression
IFITM2	10581	Wu_2012_over-expression
IFITM3	10410	Wu_2012_over-expression
IFNA13	3447	Huang_2013_under-expression
IFNA1	3439	Huang_2013_under-expression
IFNA8	3445	Huang_2013_under-expression
IFNAR1	3454	Huang_2013_under-expression
IFT140	9742	Huang_2013_under-expression
IFT27	11020	Huang_2014_under-expression
IGFBP7	3490	Wu_2012_under-expression
IGFL2	147920	Huang_2014_under-expression
IGHA1	3493	Huang_2013_under-expression
IGHA2	3494	Huang_2013_under-expression
IGHD	3495	Huang_2013_under-expression
IGHG1	3500	Huang_2013_under-expression
IGHG3	3502	Huang_2013_under-expression
IGHG4	3503	Huang_2013_under-expression
IGHM	3507	Huang_2013_under-expression
IGHV4-31	28396	Huang_2013_under-expression
IGLL5	100423062	Huang_2014_under-expression
IGSF6	10261	Wu_2012_under-expression
IKZF1	10320	Huang_2013_under-expression
IL18BP	10068	Wu_2012_under-expression
IL32	9235	Huang_2014_under-expression
ILVBL	10994	Huang_2014_under-expression
INA	9118	Wu_2012_under-expression
INF2	64423	Wu_2012_under-expression
INPP5F	22876	Wu_2012_under-expression
INTS4	92105	Wu_2012_over-expression
INVS	27130	Huang_2014_over-expression
IQUB	154865	Huang_2013_under-expression
IRF6	3664	Huang_2013_under-expression
ISYNA1	51477	Wu_2012_over-expression
ITGB2	3689	Huang_2013_under-expression
ITGB6	3694	Huang_2013_under-expression
ITM2B	9445	Wu_2012_under-expression
ITM2C	81618	Wu_2012_over-expression
ITPA	3704	Huang_2014_under-expression
ITPK1	3705	Huang_2013_under-expression
ITPR2	3709	Huang_2013_under-expression
JMJD6	23210	Wu_2012_over-expression
JPH2	57158	Huang_2013_under-expression
JTB	10899	Huang_2014_under-expression
JUN	3725	Huang_2013_under-expression
JUNB	3726	Wu_2012_under-expression
JUND	3727	Wu_2012_under-expression
KANK3	256949	Wu_2012_under-expression
KATNAL1	84056	Huang_2014_over-expression
KCNA5	3741	Huang_2014_over-expression
KCNAB2	8514	Wu_2012_under-expression
KCND1	3750	Huang_2014_under-expression
KCND3	3752	Huang_2013_under-expression
KCNF1	3754	Wu_2012_under-expression
KCNG1	3755	Wu_2012_over-expression
KCNH6	81033	Wu_2012_over-expression
KCNIP3	30818	Huang_2013_under-expression
KCNJ13	3769	Wu_2012_over-expression
KCNJ1	3758	Huang_2013_under-expression
KCNK15	60598	Huang_2013_under-expression
KCNMB1	3779	Wu_2012_over-expression
KCNQ4	9132	Huang_2014_under-expression
KCTD4	386618	Wu_2012_over-expression
KDM3A	55818	Huang_2013_over-expression
KEAP1	9817	Huang_2014_under-expression
KEL	3792	Huang_2013_under-expression
KHDC1L	100129128	Huang_2014_over-expression
KIAA0040	9674	Huang_2013_under-expression
KIAA0586	9786	Huang_2014_over-expression
KIAA1328	57536	Wu_2012_under-expression
KIAA1683	80726	Huang_2014_under-expression;Huang_2013_over-expression
KIF1C	10749	Wu_2012_over-expression
KIF21A	55605	Huang_2014_under-expression
KIF26A	26153	Huang_2013_under-expression
KIF5B	3799	Wu_2012_over-expression
KIFC2	90990	Wu_2012_under-expression
KIR3DL1	3811	Huang_2013_under-expression
KLC2	64837	Wu_2012_under-expression
KLC3	147700	Huang_2013_over-expression
KLHDC3	116138	Wu_2012_under-expression
KLHDC7A	127707	Huang_2013_under-expression
KLHDC8B	200942	Wu_2012_over-expression
KLHL25	64410	Huang_2013_over-expression
KLHL35	283212	Huang_2013_over-expression
KLK15	55554	Huang_2013_under-expression
KLRG2	346689	Huang_2013_over-expression
KRBA1	84626	Huang_2014_under-expression
KRT72	140807	Huang_2013_under-expression
KRT81	3887	Huang_2014_under-expression
KRTAP5-2	440021	Huang_2013_under-expression
LAG3	3902	Huang_2013_under-expression
LANCL1	10314	Wu_2012_under-expression
LAPTM4B	55353	Huang_2014_under-expression;Wu_2012_under-expression
LAPTM5	7805	Huang_2013_under-expression
LBH	81606	Wu_2012_under-expression
LCK	3932	Huang_2013_over-expression
LDB3	11155	Huang_2014_over-expression
LEF1	51176	Huang_2013_under-expression
LEMD1	93273	Huang_2014_under-expression
LGI3	203190	Wu_2012_under-expression
LIG3	3980	Huang_2013_under-expression
LIMD2	80774	Huang_2013_over-expression
LIMS3	96626	Huang_2013_under-expression
LINC00032	158035	Huang_2013_under-expression
LINC00051	619434	Huang_2013_over-expression
LINC00189	193629	Huang_2013_under-expression
LINC00301	283197	Huang_2013_under-expression
LINGO1	84894	Wu_2012_under-expression
LINGO2	158038	Huang_2014_over-expression
LIPF	8513	Huang_2013_under-expression
LMLN	89782	Huang_2014_under-expression
LMNA	4000	Huang_2014_under-expression
LMO3	55885	Huang_2014_over-expression
LNP1	348801	Wu_2012_under-expression
LOC100127974	100127974	Huang_2013_under-expression
LOC100129198	100129198	Huang_2013_under-expression
LOC100129476	100129476	Huang_2013_under-expression
LOC100129935	100129935	Huang_2013_under-expression
LOC100133039	100133039	Huang_2013_under-expression
LOC100134317	100134317	Huang_2013_over-expression
LOC100288893	100288893	Huang_2013_under-expression
LOC100310756	100310756	Huang_2013_over-expression
LOC100506639	100506639	Huang_2013_under-expression
LOC100507487	100507487	Huang_2013_over-expression
LOC157931	157931	Huang_2013_over-expression
LOC283710	283710	Huang_2014_over-expression
LOC284263	284263	Huang_2013_under-expression
LOC284412	284412	Huang_2013_over-expression
LOC286058	286058	Huang_2013_under-expression
LOC400590	400590	Huang_2013_over-expression
LOC642533	642533	Huang_2013_under-expression
LRAT	9227	Huang_2013_under-expression
LRP2BP	55805	Wu_2012_over-expression
LRP3	4037	Wu_2012_under-expression
LRRC16A	55604	Huang_2013_under-expression
LRRC26	389816	Huang_2014_under-expression
LRRC27	80313	Huang_2014_over-expression
LRRC53	100144878	Wu_2012_over-expression
LRRC70	100130733	Huang_2014_under-expression
LRRC8D	55144	Huang_2014_under-expression
LRRTM2	26045	Wu_2012_over-expression
LRRTM4	80059	Huang_2014_under-expression
LRTM1	57408	Wu_2012_under-expression
LSM4	25804	Huang_2014_under-expression
LSM7	51690	Wu_2012_over-expression
LSP1	4046	Huang_2013_under-expression
LTA4H	4048	Huang_2014_under-expression
LY6G6D	58530	Huang_2013_under-expression
LY6H	4062	Wu_2012_over-expression
LYG1	129530	Huang_2014_over-expression
LYPD1	116372	Wu_2012_over-expression
LYSMD4	145748	Wu_2012_under-expression
MADD	8567	Huang_2014_over-expression
MAFB	9935	Huang_2013_under-expression
MAFK	7975	Wu_2012_over-expression
MAG	4099	Wu_2012_under-expression
MAGED2	10916	Huang_2014_under-expression;Wu_2012_under-expression
MAP1LC3A	84557	Wu_2012_under-expression
MAP1LC3B	81631	Wu_2012_under-expression
MAP4	4134	Wu_2012_over-expression
MAP4K4	9448	Huang_2014_over-expression;Wu_2012_over-expression
MAP6	4135	Huang_2014_under-expression
MAP6D1	79929	Huang_2014_under-expression
MASTL	84930	Huang_2014_under-expression
MATR3	9782	Wu_2012_under-expression
MBD1	4152	Huang_2014_over-expression
MBD3L1	85509	Huang_2013_under-expression
MBP	4155	Wu_2012_over-expression
MCM10	55388	Huang_2014_over-expression
MCM3AP-AS1	114044	Wu_2012_over-expression
MCM8	84515	Huang_2014_over-expression
MCOLN2	255231	Huang_2013_under-expression
MDH1	4190	Wu_2012_under-expression
MDH1B	130752	Huang_2014_under-expression
MED22	6837	Huang_2014_under-expression
MED26	9441	Wu_2012_over-expression
MEF2C	4208	Huang_2014_over-expression
MEG3	55384	Wu_2012_under-expression
MEIS2	4212	Huang_2014_over-expression
MESTP1	338470	Wu_2012_under-expression
METRN	79006	Wu_2012_under-expression
METTL15	196074	Huang_2014_under-expression;Huang_2013_over-expression
METTL7B	196410	Huang_2014_under-expression
MFAP1	4236	Wu_2012_over-expression
MFSD11	79157	Huang_2014_under-expression
MFSD3	113655	Huang_2014_under-expression
MGAT5B	146664	Wu_2012_under-expression
MGRN1	23295	Huang_2014_under-expression
MIA-RAB4B	100529262	Huang_2013_over-expression
MICAL2	9645	Wu_2012_under-expression
MICAL3	57553	Huang_2014_over-expression
MID1IP1	58526	Huang_2014_under-expression
MINA	84864	Huang_2013_under-expression
MIR1184-1	100302111	Wu_2012_over-expression
MIR1282	100302254	Wu_2012_over-expression
MIR1302-10	100422834	Huang_2013_over-expression
MIR1302-11	100422919	Huang_2013_over-expression
MIR1302-2	100302278	Huang_2013_over-expression
MIR1302-9	100422831	Huang_2013_over-expression
MIR1307	100302174	Wu_2012_under-expression
MIR17HG	407975	Huang_2013_over-expression
MIR18A	406953	Huang_2013_over-expression
MIR19A	406979	Huang_2013_over-expression
MIR19B1	406980	Huang_2013_over-expression
MIR20A	406982	Huang_2013_over-expression
MIR564	693149	Wu_2012_under-expression
MIR637	693222	Wu_2012_over-expression
MIR770	768222	Wu_2012_over-expression
MIR922	100126321	Wu_2012_over-expression
MIR92A1	407048	Huang_2013_over-expression
MIS12	79003	Huang_2014_under-expression
MKNK2	2872	Wu_2012_over-expression
MLF2	8079	Wu_2012_under-expression
MMAB	326625	Huang_2013_under-expression
MMEL1	79258	Wu_2012_over-expression
MMP15	4324	Huang_2014_under-expression
MOBP	4336	Wu_2012_over-expression
MORF4	10934	Wu_2012_under-expression
MPDU1	9526	Huang_2014_under-expression
MPPE1	65258	Huang_2014_over-expression
MPST	4357	Huang_2014_under-expression
MRAP	56246	Wu_2012_over-expression
MRFAP1	93621	Wu_2012_over-expression
MRGPRE	116534	Huang_2014_under-expression
MRI1	84245	Huang_2013_over-expression
MRPL15	29088	Huang_2014_under-expression
MRPL43	84545	Huang_2014_under-expression
MRPL48	51642	Huang_2014_under-expression
MRPL52	122704	Huang_2014_under-expression
MRPL54	116541	Wu_2012_under-expression
MS4A6A	64231	Huang_2013_under-expression
MSMP	692094	Wu_2012_under-expression
MT2A	4502	Wu_2012_under-expression
MT3	4504	Wu_2012_over-expression
MTCH1	23787	Wu_2012_over-expression
MTCP1	4515	Wu_2012_under-expression
MTFR1	9650	Huang_2014_under-expression
MTRNR2L2	100462981	Wu_2012_over-expression
MUC13	56667	Huang_2013_over-expression
MYBPC2	4606	Wu_2012_over-expression
MYEOV	26579	Huang_2014_under-expression
MYL12B	103910	Huang_2014_over-expression;Wu_2012_under-expression
MYL6	4637	Wu_2012_over-expression
MYO1C	4641	Huang_2013_under-expression
MYO1F	4542	Huang_2013_under-expression
MYOCD	93649	Huang_2014_under-expression;Huang_2013_under-expression
MYOZ1	58529	Huang_2013_under-expression
MYPOP	339344	Huang_2014_under-expression
NAGLU	4669	Huang_2014_under-expression
NAGS	162417	Huang_2014_under-expression
NAPA	8775	Wu_2012_under-expression
NAT8L	339983	Wu_2012_under-expression
NCALD	83988	Wu_2012_under-expression
NCDN	23154	Huang_2013_under-expression
NCKIPSD	51517	Wu_2012_under-expression
NCL	4691	Wu_2012_over-expression
NCOR2	9612	Huang_2014_under-expression
NDRG1	10397	Wu_2012_over-expression
NDRG2	57447	Wu_2012_over-expression
NDRG3	57446	Wu_2012_under-expression
NDUFA11	126328	Wu_2012_under-expression
NDUFA1	4694	Wu_2012_over-expression
NDUFA4	4697	Wu_2012_under-expression
NDUFA5	4698	Wu_2012_under-expression
NDUFAB1	4706	Wu_2012_under-expression
NDUFAF3	25915	Wu_2012_under-expression
NDUFB11	54539	Huang_2014_under-expression;Wu_2012_under-expression
NDUFB2	4708	Wu_2012_under-expression
NDUFB4	4710	Wu_2012_under-expression
NDUFC1	4717	Wu_2012_under-expression
NDUFS4	4724	Wu_2012_under-expression
NDUFS5	4725	Wu_2012_over-expression
NDUFS7	374291	Wu_2012_under-expression
NEB	4703	Huang_2014_under-expression
NECAB3	63941	Huang_2014_under-expression;Wu_2012_under-expression
NEFH	4744	Wu_2012_under-expression
NEFL	4747	Wu_2012_under-expression
NES	10763	Huang_2013_under-expression
NEU4	129807	Huang_2013_over-expression
NF1	4763	Huang_2014_under-expression
NFATC4	4776	Huang_2014_over-expression
NFIX	4784	Huang_2013_under-expression
NFKBIZ	64332	Huang_2014_under-expression
NFXL1	152518	Huang_2014_under-expression
NGEF	25791	Wu_2012_under-expression
NHLRC4	283948	Huang_2014_under-expression
NHP2	55651	Wu_2012_under-expression
NID1	4811	Huang_2013_under-expression
NMRAL1	57407	Huang_2014_under-expression
NNAT	4826	Wu_2012_under-expression
NOS1	4842	Huang_2014_over-expression
NOX3	50508	Huang_2013_over-expression
NPAS1	4861	Huang_2014_under-expression
NPAS4	266743	Wu_2012_under-expression
NPBWR2	2832	Wu_2012_under-expression
NPDC1	56654	Wu_2012_under-expression
NPHS1	4868	Wu_2012_over-expression
NPL	80896	Huang_2014_under-expression
NPPA	4878	Wu_2012_over-expression
NPRL3	8131	Huang_2014_under-expression
NPTX1	4884	Wu_2012_over-expression
NPTX2	4885	Wu_2012_over-expression
NPTXR	23467	Wu_2012_over-expression
NPY6R	4888	Huang_2013_under-expression
NR4A1	3164	Wu_2012_under-expression
NR6A1	2649	Huang_2013_over-expression
NRGN	4900	Wu_2012_under-expression
NRSN2	80023	Wu_2012_under-expression
NRXN1	9378	Huang_2013_under-expression
NSA2	10412	Huang_2014_under-expression
NSF	4905	Wu_2012_under-expression
NUB1	51667	Huang_2014_under-expression
NUCKS1	64710	Wu_2012_over-expression
NUDC	10726	Wu_2012_over-expression
NUDT16	131870	Wu_2012_over-expression
NUDT22	84304	Huang_2014_under-expression;Wu_2012_under-expression
NUDT3	11165	Huang_2014_over-expression;Wu_2012_over-expression
NUDT6	11162	Wu_2012_over-expression
NUP54	53371	Huang_2013_under-expression
OAS3	4940	Huang_2013_over-expression
OC90	729330	Huang_2014_over-expression
ODF2	4957	Huang_2014_under-expression
OLFM1	10439	Wu_2012_under-expression
OLIG1	116448	Wu_2012_under-expression
OLR1	4973	Huang_2014_under-expression
OMD	4958	Wu_2012_over-expression
OMG	4974	Wu_2012_under-expression
OPA3	80207	Huang_2014_under-expression
OR10C1	442194	Huang_2013_under-expression
OR11H12	440153	Huang_2014_under-expression
OR13C4	138804	Huang_2013_under-expression
OR4N4	283694	Wu_2012_over-expression
OR7E19P	26651	Huang_2013_over-expression
ORC5	5001	Huang_2013_over-expression
OSGEP	55644	Wu_2012_under-expression
OSMR	9180	Huang_2013_over-expression
OTOL1	131149	Huang_2014_over-expression
OTOP2	92736	Huang_2014_under-expression
OVOL1	5017	Huang_2014_over-expression
OVOL3	728361	Huang_2013_over-expression
OXA1L	5018	Huang_2014_under-expression
PACRGL	133015	Huang_2014_under-expression
PAIP2B	400961	Wu_2012_over-expression
PAQR6	79957	Wu_2012_over-expression
PARD3	56288	Huang_2014_over-expression
PARD3B	117583	Huang_2014_over-expression
PARD6A	50855	Huang_2014_under-expression
PARVG	64098	Huang_2013_over-expression
PBXIP1	57326	Wu_2012_over-expression
PCDHA4	56144	Wu_2012_under-expression
PCNA	5111	Huang_2014_under-expression
PCP4	5121	Wu_2012_under-expression
PCSK1	5122	Wu_2012_under-expression
PCSK1N	27344	Wu_2012_under-expression
PDCD10	11235	Huang_2014_under-expression
PDE3A	5139	Wu_2012_over-expression
PDE4A	5141	Huang_2014_under-expression
PDE4B	5142	Huang_2014_under-expression
PDE4D	5144	Huang_2014_under-expression
PDLIM7	9260	Huang_2013_under-expression
PDSS1	23590	Wu_2012_under-expression
PDZD9	255762	Huang_2014_under-expression
PEA15	8682	Wu_2012_over-expression
PEAK1	79834	Huang_2013_under-expression
PEBP1	5037	Wu_2012_over-expression
PEX5	5830	Huang_2014_under-expression
PFDN2	5202	Wu_2012_over-expression
PFDN6	10471	Wu_2012_over-expression
PFKM	5213	Wu_2012_under-expression
PFN2	5217	Wu_2012_under-expression
PGAM5	192111	Huang_2014_over-expression
PGAP2	27315	Huang_2014_over-expression
PGC	5225	Wu_2012_over-expression
PGP	283871	Huang_2014_under-expression
PGPEP1	54858	Wu_2012_over-expression
PHB2	11331	Huang_2014_under-expression
PHC3	80012	Huang_2013_under-expression
PHLDA1	22822	Huang_2013_under-expression
PHLDA2	7262	Huang_2014_under-expression
PHYH	5264	Huang_2014_under-expression
PICK1	9463	Huang_2014_under-expression
PIGC	5279	Wu_2012_under-expression
PIGG	54872	Huang_2014_under-expression
PIGH	5283	Wu_2012_under-expression
PIGQ	9091	Huang_2014_under-expression
PIGU	128869	Huang_2014_under-expression
PIN4	5303	Huang_2014_under-expression
PIP5K1C	23396	Wu_2012_under-expression
PIP5K1P1	206426	Wu_2012_over-expression
PKD1L2	114780	Huang_2013_under-expression
PKD2L2	27039	Wu_2012_over-expression
PKIB	5570	Wu_2012_under-expression
PKP1	5317	Huang_2014_under-expression
PKP4	8502	Wu_2012_over-expression
PLA2G4C	8605	Huang_2014_under-expression
PLAC8	51316	Huang_2013_under-expression
PLAU	5328	Huang_2014_under-expression
PLB1	151056	Huang_2014_over-expression
PLCB3	5331	Huang_2014_over-expression
PLCE1	51196	Huang_2014_over-expression
PLCH1	23007	Huang_2014_over-expression
PLD1	5337	Huang_2013_under-expression
PLD3	23646	Wu_2012_under-expression
PLEKHB1	58473	Wu_2012_over-expression
PLEKHB2	55041	Huang_2014_under-expression
PLEKHG3	26030	Huang_2013_under-expression
PLGLB1	5343	Wu_2012_under-expression
PLGLB2	5342	Wu_2012_under-expression
PLK3	1263	Huang_2014_under-expression
PLLP	51090	Wu_2012_under-expression
PLP1	5354	Wu_2012_under-expression
PM20D1	148811	Huang_2014_over-expression
PMCH	5367	Huang_2014_over-expression
PMF1	11243	Huang_2014_under-expression
PMVK	10654	Wu_2012_over-expression
PNMA5	114824	Wu_2012_over-expression
PNMT	5409	Huang_2013_under-expression
PNPLA7	375775	Huang_2013_over-expression
POLH	5429	Wu_2012_over-expression
POLR2F	5435	Wu_2012_over-expression
POLR2L	5441	Wu_2012_over-expression
POLR3B	55703	Huang_2013_over-expression
POMGNT1	55624	Huang_2014_under-expression
POTEJ	653781	Wu_2012_over-expression
POU6F1	5463	Huang_2014_under-expression
PPIA	5478	Wu_2012_over-expression
PPIEL	728448	Huang_2013_under-expression
PPIL1	51645	Wu_2012_under-expression
PPIL3	53938	Huang_2014_over-expression
PPM1N	147699	Wu_2012_over-expression
PPP1R15A	23645	Wu_2012_over-expression
PPP1R16A	84988	Wu_2012_under-expression
PPP1R8	5511	Huang_2014_over-expression
PPP2R1B	5519	Huang_2014_under-expression
PPP2R5D	5528	Huang_2014_under-expression
PPP3CA	5530	Wu_2012_under-expression
PPP6C	5537	Huang_2014_under-expression
PPT1	5538	Wu_2012_under-expression
PQLC2	54896	Huang_2014_under-expression
PRAMEF11	440560	Huang_2013_over-expression
PRCP	5547	Huang_2013_under-expression
PRDM11	56981	Huang_2013_under-expression
PRDX2	7001	Wu_2012_under-expression
PRDX5	25824	Wu_2012_over-expression
PRELID1	27166	Huang_2014_over-expression
PRKAB1	5564	Huang_2014_under-expression
PRKACA	5566	Huang_2014_under-expression;Wu_2012_under-expression
PRKCG	5582	Wu_2012_over-expression
PRKCH	5583	Huang_2013_over-expression
PRKCZ	5590	Huang_2014_over-expression
PRKG1	5592	Wu_2012_under-expression
PRNP	5621	Huang_2014_over-expression
PRO0471	28994	Huang_2013_over-expression
PRR14L	253143	Huang_2013_over-expression
PRR15	222171	Huang_2013_under-expression
PRSS36	146547	Huang_2014_under-expression
PRSS56	646960	Huang_2014_under-expression
PRSS8	5652	Huang_2013_over-expression
PSG2	5670	Huang_2013_under-expression
PSMA5	5686	Huang_2014_under-expression
PSMB3	5691	Wu_2012_under-expression
PSMC3IP	29893	Wu_2012_over-expression
PSMD13	5719	Huang_2014_over-expression
PSMD4	5710	Wu_2012_over-expression
PSMD5	5711	Huang_2013_under-expression
PSMD8	5714	Wu_2012_under-expression
PTCHD3	374308	Huang_2014_over-expression
PTGDS	5730	Wu_2012_under-expression
PTGFR	5737	Huang_2013_under-expression
PTGS2	5743	Wu_2012_under-expression
PTMAP5	150928	Wu_2012_over-expression
PTMS	5763	Wu_2012_over-expression
PTPDC1	138639	Huang_2014_under-expression
PTPRC	5788	Huang_2013_under-expression
PTPRN	5798	Wu_2012_under-expression
PTPRU	10076	Huang_2014_under-expression
PTTG1	9232	Huang_2014_over-expression
PURA	5813	Huang_2013_under-expression
PURB	5814	Huang_2013_under-expression
PVALB	5816	Wu_2012_under-expression
PWRN1	791114	Huang_2013_over-expression
PYCARD	29108	Wu_2012_under-expression
PYDC1	260434	Wu_2012_over-expression
QARS	5859	Huang_2014_under-expression
QDPR	5860	Wu_2012_under-expression
RAB1B	81876	Wu_2012_under-expression
RAB20	55647	Huang_2013_over-expression
RAB37	326624	Huang_2014_under-expression
RAB40C	57799	Huang_2014_under-expression
RAB4B	53916	Huang_2013_over-expression
RAB7B	338382	Huang_2013_under-expression
RABGGTA	5875	Huang_2014_under-expression
RAD51B	5890	Huang_2014_under-expression
RALGDS	5900	Huang_2014_over-expression
RARA	5914	Huang_2013_under-expression
RASD2	23551	Wu_2012_under-expression
RASGRP2	10235	Huang_2014_under-expression
RASIP1	54922	Huang_2014_under-expression
RASSF7	8045	Huang_2014_over-expression
RAX2	84839	Wu_2012_over-expression
RBBP9	10741	Huang_2013_under-expression
RBFOX3	146713	Wu_2012_under-expression
RBL2	5934	Huang_2013_under-expression
RBM47	54502	Huang_2013_under-expression
RBMS1	5937	Huang_2014_under-expression
RBMS2	5939	Huang_2013_under-expression
RBMXL1	494115	Huang_2014_under-expression
RBP1	5947	Wu_2012_over-expression
RC3H1	149041	Huang_2013_over-expression
RCAN2	10231	Wu_2012_under-expression
REEP2	51308	Wu_2012_under-expression
REEP3	221035	Huang_2013_over-expression
REEP5	7905	Wu_2012_under-expression
REPS1	85021	Huang_2014_under-expression
RGS22	26166	Huang_2013_under-expression
RGS2	5997	Wu_2012_under-expression
RGS4	5999	Wu_2012_under-expression
RGS6	9628	Huang_2014_under-expression
RGS7	6000	Huang_2013_under-expression
RHCG	51458	Huang_2013_over-expression
RIMS3	9783	Wu_2012_under-expression
RN7SK	125050	Wu_2012_over-expression
RNASE1	6035	Wu_2012_under-expression
RNF146	81847	Huang_2014_over-expression
RNF187	149603	Huang_2013_over-expression
RNF24	11237	Huang_2014_over-expression
RNF2	6045	Huang_2013_under-expression
RNF26	79102	Huang_2014_under-expression
RNH1	6050	Huang_2014_under-expression
ROBO1	6091	Huang_2014_over-expression
RP9P	441212	Wu_2012_over-expression
RPH3A	22895	Wu_2012_under-expression
RPL10	6134	Huang_2013_under-expression
RPL11	6135	Wu_2012_over-expression
RPL13P6	100129176	Wu_2012_over-expression
RPL15	6138	Wu_2012_under-expression
RPL18	6141	Wu_2012_over-expression
RPL27	6155	Wu_2012_under-expression
RPL35	11224	Wu_2012_over-expression
RPL3	6122	Wu_2012_over-expression
RPL36	25873	Wu_2012_over-expression
RPL37	6167	Wu_2012_over-expression
RPL37A	6168	Wu_2012_over-expression
RPL37AP8	644338	Wu_2012_over-expression
RPL39P5	553117	Wu_2012_under-expression
RPL8	6132	Wu_2012_over-expression
RPLP0	6175	Wu_2012_under-expression
RPLP1	6176	Wu_2012_under-expression
RPRM	56475	Huang_2014_over-expression;Wu_2012_over-expression
RPS14	6208	Huang_2014_over-expression;Wu_2012_over-expression
RPS15	6209	Wu_2012_over-expression
RPS16	6217	Wu_2012_over-expression
RPS21	6227	Wu_2012_under-expression
RPS27A	6233	Huang_2013_under-expression
RPS3	6188	Wu_2012_over-expression
RPS5	6193	Wu_2012_under-expression
RPS6	6194	Wu_2012_over-expression
RPS8	6202	Wu_2012_over-expression
RPS9	6203	Wu_2012_over-expression
RSPH10B	222967	Huang_2014_over-expression
RSPH9	221421	Huang_2013_over-expression;Wu_2012_over-expression
RTEL1-TNFRSF6B	100533107	Huang_2013_under-expression
RTN3	10313	Wu_2012_under-expression
RTN4R	65078	Wu_2012_under-expression
RUVBL2	10856	Huang_2013_over-expression
S100A13	6284	Huang_2014_over-expression;Wu_2012_over-expression
S100A1	6271	Wu_2012_over-expression
S100A2	6273	Huang_2014_over-expression
S100B	6285	Wu_2012_over-expression
SAMD9L	219285	Huang_2013_over-expression
SAPCD1	401251	Huang_2014_under-expression
SARDH	1757	Huang_2013_under-expression
SBSN	374897	Huang_2014_over-expression
SCAMP5	192683	Wu_2012_under-expression
SCAND1	51282	Wu_2012_under-expression
SCEL	8796	Huang_2013_under-expression
SCGB3A2	117156	Huang_2013_over-expression
SCIN	85477	Huang_2013_under-expression
SCN1B	6324	Wu_2012_under-expression
SCN3B	55800	Wu_2012_over-expression
SCN4B	6330	Wu_2012_under-expression
SCO2	9997	Huang_2014_under-expression
SCRT1	83482	Wu_2012_under-expression
SCT	6343	Wu_2012_over-expression
SDCBP2	27111	Huang_2014_under-expression
SEC14L1	6397	Huang_2014_under-expression
SEC23B	10483	Huang_2014_over-expression
SEC24C	9632	Huang_2014_over-expression
SEC61G	23480	Wu_2012_under-expression
SEMA7A	8482	Wu_2012_under-expression
SERBP1	26135	Huang_2014_over-expression
SERF2	10169	Wu_2012_over-expression
SERINC4	619189	Wu_2012_over-expression
SERPINA1	5265	Huang_2013_under-expression
SERPIND1	3053	Huang_2014_under-expression;Wu_2012_under-expression
SERPINH1	871	Wu_2012_over-expression
SERPINI1	5274	Wu_2012_under-expression
SETDB2	83852	Huang_2013_under-expression
SEZ6L2	26470	Huang_2014_under-expression;Wu_2012_under-expression
SH3BGRL3	83442	Wu_2012_under-expression
SH3BGRL	6451	Wu_2012_under-expression
SH3GL2	6456	Wu_2012_under-expression
SH3GLB2	56904	Huang_2013_under-expression
SH3TC2	79628	Huang_2013_over-expression
SHFM1	7979	Wu_2012_over-expression
SHISA6	388336	Huang_2014_under-expression
SHKBP1	92799	Huang_2014_under-expression
SHROOM4	57477	Huang_2013_under-expression
SIK1	150094	Wu_2012_under-expression
SIN3A	25942	Huang_2014_over-expression
SIRPB1	10326	Huang_2013_over-expression
SIRT4	23409	Huang_2013_under-expression
SIVA1	10572	Huang_2014_over-expression
SKA1	220134	Huang_2013_under-expression
SLC13A1	6561	Huang_2013_over-expression
SLC15A3	51296	Wu_2012_under-expression
SLC16A3	9123	Huang_2013_over-expression
SLC20A1	6574	Huang_2014_under-expression
SLC22A17	51310	Wu_2012_under-expression
SLC22A25	387601	Huang_2014_over-expression
SLC22A9	114571	Huang_2013_under-expression
SLC25A11	8402	Wu_2012_under-expression
SLC25A14	9016	Huang_2014_under-expression
SLC25A3	5250	Wu_2012_under-expression
SLC25A5	292	Huang_2014_under-expression;Wu_2012_under-expression
SLC2A13	114134	Huang_2013_under-expression
SLC2A5	6518	Huang_2013_under-expression
SLC30A6	55676	Huang_2013_under-expression
SLC30A7	148867	Huang_2013_under-expression
SLC32A1	140679	Huang_2013_over-expression
SLC35A4	113829	Huang_2014_under-expression
SLC35F4	341880	Huang_2013_over-expression
SLC35G1	159371	Huang_2013_under-expression
SLC37A4	2542	Huang_2014_under-expression
SLC38A1	81539	Huang_2014_over-expression
SLC38A8	146167	Huang_2014_under-expression
SLC39A13	91252	Huang_2014_under-expression
SLC39A2	29986	Huang_2013_over-expression
SLC39A5	283375	Wu_2012_over-expression
SLC39A8	64116	Huang_2014_under-expression
SLC3A1	6519	Huang_2014_over-expression
SLC5A11	115584	Huang_2014_under-expression;Huang_2013_over-expression
SLC5A2	6524	Wu_2012_over-expression
SLC6A9	6536	Huang_2014_under-expression
SLC9A8	23315	Huang_2014_under-expression
SLCO5A1	81796	Wu_2012_over-expression
SMG9	56006	Huang_2014_under-expression
SMPD1	6609	Huang_2014_under-expression
SMYD4	114826	Huang_2013_under-expression
SMYD5	10322	Huang_2014_under-expression
SNAP25	6616	Wu_2012_under-expression
SNAPC2	6618	Wu_2012_under-expression
SNAPIN	23557	Huang_2014_under-expression
SNCA	6622	Wu_2012_over-expression
SNCG	6623	Wu_2012_over-expression
SNN	8303	Wu_2012_under-expression
SNORA18	677805	Wu_2012_under-expression
SNORA31	677814	Wu_2012_over-expression
SNORA40	677822	Wu_2012_under-expression
SNORA57	692158	Wu_2012_over-expression
SNORA64	26784	Wu_2012_over-expression
SNORA67	26781	Wu_2012_over-expression
SNORA73A	6080	Wu_2012_over-expression
SNORA7A	619563	Wu_2012_over-expression
SNORA8	654320	Wu_2012_under-expression
SNORD17	692086	Wu_2012_over-expression
SNORD94	692225	Wu_2012_over-expression
SNRPD3	6634	Wu_2012_over-expression
SNTB2	6645	Wu_2012_over-expression
SNTG2	54221	Huang_2013_over-expression
SNURF	8926	Wu_2012_over-expression
SNX12	29934	Huang_2013_over-expression
SNX15	29907	Wu_2012_under-expression
SNX17	9784	Wu_2012_under-expression
SNX21	90203	Huang_2014_under-expression
SNX3	8724	Huang_2014_over-expression
SOCS7	30837	Huang_2013_under-expression
SOD1	6647	Wu_2012_over-expression
SORBS2	8470	Huang_2013_under-expression
SOX6	55553	Huang_2013_under-expression
SP140L	93349	Huang_2013_under-expression
SP1	6667	Huang_2014_over-expression
SP5	389058	Huang_2013_under-expression
SPARCL1	8404	Huang_2014_under-expression;Wu_2012_under-expression
SPATA21	374955	Wu_2012_over-expression
SPATA2L	124044	Huang_2014_under-expression
SPCS1	28972	Wu_2012_under-expression
SPDYE3	441272	Huang_2014_under-expression
SPHAR	10638	Wu_2012_under-expression
SPNS1	83985	Huang_2014_under-expression
SPOP	8405	Huang_2014_over-expression
SPP1	6696	Wu_2012_under-expression
SPR	6697	Wu_2012_over-expression
SPRR3	6707	Huang_2013_under-expression
SPSB2	84727	Wu_2012_over-expression
SQRDL	58472	Huang_2014_under-expression
SRP19	6728	Huang_2014_over-expression
SRP9	6726	Wu_2012_under-expression
SSFA2	6744	Huang_2014_over-expression
SST	6750	Wu_2012_under-expression
SSX5	6758	Huang_2014_over-expression
ST14	6768	Huang_2014_under-expression
ST20	400410	Huang_2014_under-expression
STAG3	10734	Wu_2012_over-expression
STAMBP	10617	Huang_2014_under-expression
STARD6	147323	Huang_2014_over-expression
STAT3	6774	Huang_2014_under-expression
STIM2	57620	Huang_2014_under-expression
STIP1	10963	Wu_2012_over-expression
STK25	10494	Huang_2014_over-expression
STK3	6788	Huang_2013_under-expression
STK40	83931	Huang_2014_under-expression
STMN2	11075	Wu_2012_under-expression
STMN3	50861	Wu_2012_under-expression
STRADA	92335	Huang_2014_under-expression
STX1A	6804	Huang_2014_under-expression
SULT1A2	6799	Wu_2012_under-expression
SUMO4	387082	Wu_2012_over-expression
SUPT3H	8464	Huang_2014_over-expression
SURF1	6834	Wu_2012_under-expression
SURF2	6835	Wu_2012_over-expression
SYCE1	93426	Huang_2014_over-expression
SYCE2	256126	Wu_2012_over-expression
SYCP3	50511	Wu_2012_over-expression
SYK	6850	Huang_2013_over-expression
SYN2	6854	Wu_2012_over-expression
SYNGR3	9143	Wu_2012_under-expression
SYP	6855	Wu_2012_over-expression
SYT1	6857	Wu_2012_under-expression
SYT2	127833	Wu_2012_under-expression
SYT3	84258	Wu_2012_under-expression
TADA2A	6871	Huang_2014_under-expression
TADA3	10474	Wu_2012_under-expression
TAF15	8148	Wu_2012_over-expression
TAF6L	10629	Huang_2013_under-expression
TAGLN	6876	Wu_2012_over-expression
TAPBPL	55080	Wu_2012_over-expression
TARS2	80222	Huang_2014_under-expression
TAS2R5	54429	Huang_2014_under-expression
TBC1D23	55773	Huang_2014_under-expression
TBC1D25	4943	Huang_2013_over-expression
TBC1D26	353149	Wu_2012_over-expression
TBC1D8	11138	Huang_2013_under-expression
TBCD	6904	Huang_2013_under-expression
TBL1X	6907	Huang_2014_over-expression
TBL1Y	90665	Huang_2014_under-expression
TBRG4	9238	Huang_2014_under-expression
TBXA2R	6915	Wu_2012_over-expression
TCEAL2	140597	Wu_2012_over-expression
TCEAL3	85012	Wu_2012_over-expression
TCEAL4	79921	Wu_2012_over-expression
TCEAL5	340543	Wu_2012_over-expression
TCERG1	10915	Huang_2013_under-expression
TCF24	100129654	Huang_2014_over-expression
TCOF1	6949	Huang_2014_under-expression
TCTE1	202500	Wu_2012_under-expression
TCTE3	6991	Wu_2012_over-expression
TECR	9524	Huang_2013_over-expression
TEP1	7011	Huang_2013_under-expression
TF	7018	Wu_2012_under-expression
TFAP2A	7020	Huang_2013_under-expression
TFG	10342	Huang_2014_under-expression
TGFB3	7043	Wu_2012_over-expression
TGM3	7053	Huang_2014_over-expression
THADA	63892	Huang_2013_under-expression
THOC5	8563	Huang_2014_under-expression
THRA	7067	Wu_2012_over-expression
THTPA	79178	Wu_2012_under-expression
TIMP1	7076	Wu_2012_over-expression
TIMP4	7079	Wu_2012_under-expression
TJP3	27134	Wu_2012_over-expression
TLR10	81793	Huang_2013_under-expression
TLR4	7099	Huang_2013_under-expression
TM9SF1	10548	Huang_2014_under-expression
TMEM114	283953	Huang_2014_under-expression
TMEM121	80757	Huang_2014_under-expression
TMEM125	128218	Huang_2013_under-expression
TMEM134	80194	Huang_2014_under-expression
TMEM136	219902	Huang_2014_over-expression
TMEM160	54958	Wu_2012_under-expression
TMEM184A	202915	Wu_2012_over-expression
TMEM184B	25829	Huang_2014_under-expression
TMEM244	253582	Huang_2014_over-expression
TMEM59L	25789	Wu_2012_under-expression
TMEM79	84283	Wu_2012_over-expression
TMPRSS2	7113	Huang_2014_under-expression
TMSB10	9168	Wu_2012_over-expression
TMSB4X	7114	Wu_2012_over-expression
TNAP	445341	Huang_2013_under-expression
TNFRSF10B	8795	Huang_2014_over-expression
TNFRSF1B	7133	Huang_2013_under-expression
TNFRSF6B	8771	Huang_2013_under-expression
TNNT1	7138	Wu_2012_over-expression
TNXA	7146	Huang_2013_over-expression
TNXB	7148	Huang_2013_over-expression
TOMM20L	387990	Wu_2012_over-expression
TONSL	4796	Wu_2012_under-expression
TOP1P2	7152	Huang_2013_over-expression
TOP3A	7156	Huang_2013_under-expression
TP53	7157	Huang_2014_under-expression
TP53INP2	58476	Wu_2012_over-expression
TPBG	7162	Huang_2014_under-expression
TPGS2	25941	Huang_2014_under-expression
TPH2	121278	Huang_2013_over-expression
TPM2	7169	Wu_2012_over-expression
TPM3	7170	Huang_2014_over-expression
TPP2	7174	Huang_2013_under-expression
TPSG1	25823	Wu_2012_over-expression
TPT1	7178	Wu_2012_over-expression
TRAF1	7185	Huang_2014_under-expression
TRAF4	9618	Huang_2013_under-expression
TRBV27	28560	Huang_2013_under-expression
TREX1	11277	Huang_2014_under-expression;Wu_2012_under-expression
TRIM37	4591	Wu_2012_under-expression
TRIM4	89122	Huang_2014_over-expression
TRIM72	493829	Wu_2012_over-expression
TRMT112	51504	Wu_2012_over-expression
TRMT61A	115708	Huang_2013_over-expression
TRPC1	7220	Huang_2014_over-expression
TRPC4	7223	Huang_2013_under-expression
TRPC5	7224	Huang_2013_under-expression
TRPM7	54822	Huang_2013_under-expression
TRPV1	7442	Huang_2014_under-expression
TSC22D1	8848	Wu_2012_under-expression
TSLP	85480	Huang_2013_under-expression
TSPAN10	83882	Wu_2012_over-expression
TSPAN15	23555	Huang_2013_under-expression
TSPAN16	26526	Wu_2012_over-expression
TSPAN18	90139	Huang_2013_over-expression;Wu_2012_over-expression
TSPYL2	64061	Wu_2012_over-expression
TSR2	90121	Wu_2012_over-expression
TSSK1B	83942	Wu_2012_under-expression
TTC21A	199223	Huang_2013_over-expression
TTC9B	148014	Wu_2012_under-expression
TTLL5	23093	Huang_2014_under-expression
TTYH1	57348	Wu_2012_under-expression
TUBA4A	7277	Wu_2012_under-expression
TUBB2A	7280	Wu_2012_over-expression
TUBB2B	347733	Wu_2012_over-expression
TUBB3	10381	Wu_2012_over-expression
TUBB8	347688	Huang_2014_over-expression
TWISTNB	221830	Huang_2013_under-expression
TXNDC11	51061	Wu_2012_over-expression
U2AF1	7307	Wu_2012_over-expression
UACA	55075	Huang_2013_under-expression
UBA52	7311	Wu_2012_over-expression
UBA52P6	100130239	Wu_2012_over-expression
UBASH3A	53347	Huang_2013_under-expression
UBB	7314	Wu_2012_over-expression
UBC	7316	Wu_2012_over-expression
UBE2L3	7332	Huang_2014_under-expression
UBE2NL	389898	Huang_2013_under-expression
UBE2QL1	134111	Wu_2012_under-expression
UBIAD1	29914	Huang_2014_under-expression
UBL7	84993	Huang_2014_under-expression;Wu_2012_under-expression
UBXN6	80700	Huang_2013_under-expression
UCP2	7351	Huang_2013_over-expression
UGP2	7360	Wu_2012_under-expression
UQCRFS1	7386	Wu_2012_under-expression
UQCRH	7388	Wu_2012_under-expression
URGCP-MRPS24	100534592	Huang_2014_over-expression
USMG5	84833	Wu_2012_under-expression
USP3	9960	Huang_2014_over-expression
UTS2	10911	Wu_2012_under-expression
UXT	8409	Huang_2014_over-expression
VAMP1	6843	Wu_2012_under-expression
VAMP5	10791	Wu_2012_over-expression
VEPH1	79674	Huang_2014_over-expression;Huang_2013_under-expression
VGF	7425	Wu_2012_under-expression
VN1R4	317703	Huang_2013_over-expression
VPREB3	29802	Huang_2014_under-expression
VPS52	6293	Huang_2014_under-expression
VRK2	7444	Huang_2014_over-expression
VSIG2	23584	Huang_2014_under-expression
VWA5B2	90113	Huang_2014_under-expression
WAS	7454	Huang_2013_under-expression
WDR20	91833	Huang_2014_over-expression
WDR34	89891	Wu_2012_under-expression
WDR62	284403	Huang_2013_under-expression
WDR66	144406	Huang_2014_over-expression
WISP3	8838	Wu_2012_over-expression
WNT9A	7483	Huang_2014_over-expression
WWP2	11060	Huang_2014_under-expression
YIF1B	90522	Huang_2014_under-expression
YIPF6	286451	Huang_2014_under-expression
YWHAE	7531	Wu_2012_over-expression
YWHAH	7533	Wu_2012_over-expression
ZACN	353174	Wu_2012_over-expression
ZDHHC13	54503	Huang_2014_under-expression;Huang_2013_under-expression
ZDHHC21	340481	Huang_2013_over-expression
ZEB2	9839	Wu_2012_over-expression
ZFPL1	7542	Huang_2013_over-expression
ZFX	7543	Huang_2013_under-expression
ZNF133	7692	Huang_2014_under-expression
ZNF148	7707	Huang_2013_under-expression
ZNF174	7727	Huang_2014_under-expression
ZNF181	339318	Huang_2014_under-expression
ZNF189	7743	Huang_2014_over-expression
ZNF195	7748	Huang_2014_under-expression
ZNF19	7567	Huang_2013_under-expression
ZNF200	7752	Huang_2014_under-expression
ZNF24	7572	Huang_2013_over-expression
ZNF33B	7582	Huang_2013_under-expression
ZNF345	25850	Huang_2013_under-expression
ZNF358	140467	Wu_2012_under-expression
ZNF385A	25946	Wu_2012_under-expression
ZNF512	84450	Huang_2014_under-expression
ZNF551	90233	Huang_2013_under-expression
ZNF587	84914	Huang_2013_under-expression
ZNF589	51385	Huang_2013_over-expression
ZNF616	90317	Huang_2013_under-expression
ZNF620	253639	Huang_2014_under-expression
ZNF660	285349	Huang_2014_over-expression
ZNF71	58491	Huang_2013_under-expression
ZNF844	284391	Huang_2013_under-expression
ZPLD1	131368	Huang_2014_over-expression
ZRSR1	7310	Wu_2012_over-expression
ZSCAN23	222696	Huang_2014_over-expression
ZYX	7791	Wu_2012_under-expression
