# Supplementary material for: Epigenetic profiling of human brain differential DNA methylation networks in schizophrenia
Source: BMC Med Genomics. 2016 Dec 5;9(Suppl 3):68. doi: 10.1186/s12920-016-0229-y (PMC5260790; doi:10.1186/s12920-016-0229-y)
Supplement: Additional file 2: — Pathway enrichment analysis of SDMGs, hypermethylating SDMGs and SDMGs with level 1 PPI. (XLSX 576 kb) [file 12920_2016_229_MOESM2_ESM.xlsx]

## Sheet: A_promotor_intron_exon_pathway
Methylation genes in pathway	Involving pathway name	Total genes in pathway	P-value	FDR_adjust
40	NetPath TGF_beta_Receptor	203	6.42082e-09	3.62046e-09
57	KEGG Pyrimidine metabolism	367	6.81371e-09	1.04403e-07
97	KEGG Metabolic pathways	863	1.04658e-07	1.462e-07
31	BioGRID TGF_beta_Receptor	157	3.49765e-07	1.462e-07
25	NetPath Wnt	106	3.80014e-07	2.90795e-07
60	Reactome Metabolic pathways	465	6.99896e-07	2.90795e-07
30	HPRD TGF_beta_Receptor	157	9.6669e-07	2.90795e-07
34	KEGG Folate biosynthesis	199	1.46334e-06	2.90795e-07
39	KEGG Nicotinate and nicotinamide metabolism	249	1.47396e-06	5.40782e-07
48	KEGG Purine metabolism	351	2.3851e-06	5.40782e-07
73	HumanCyc Metabolic pathways	643	2.74648e-06	5.40782e-07
44	pid CDC42 signaling events	311	3.02084e-06	5.40782e-07
32	KEGG One carbon pool by folate	190	3.88458e-06	5.40782e-07
47	pid PDGFR-beta signaling pathway	348	4.01696e-06	9.10733e-07
30	KEGG Fructose and mannose metabolism	173	4.92441e-06	9.10733e-07
28	PANTHER Angiogenesis	157	6.7601e-06	9.10733e-07
51	INOH Thiele2013 - Human metabolism global reconstruction (Recon 2)	404	7.80702e-06	9.10733e-07
19	IntAct TGF_beta_Receptor	78	7.89244e-06	9.10733e-07
47	pid ErbB1 downstream signaling	360	8.49093e-06	9.10733e-07
46	KEGG Glycerophospholipid metabolism	350	9.15617e-06	1.65919e-06
41	KEGG Glycolysis / Gluconeogenesis	299	1.22095e-05	1.65919e-06
43	pid Signaling events mediated by VEGFR1 and VEGFR2	322	1.29081e-05	1.65919e-06
40	KEGG Pyruvate metabolism	291	1.48569e-05	1.65919e-06
42	INOH Metabolic pathways	314	1.57197e-05	1.65919e-06
84	HumanCyc Thiele2013 - Human metabolism global reconstruction (Recon 2)	824	1.69584e-05	1.99116e-06
15	BioGRID Wnt	53	2.19549e-05	1.99116e-06
46	KEGG Amino sugar and nucleotide sugar metabolism	367	2.47225e-05	1.99116e-06
57	KEGG Thiele2013 - Human metabolism global reconstruction (Recon 2)	497	2.48943e-05	1.99116e-06
34	pid EPHB forward signaling	234	2.58493e-05	1.99116e-06
42	SMPDB Metabolic pathways	323	2.7265e-05	1.99116e-06
37	pid Osteopontin-mediated events	268	2.86168e-05	1.99116e-06
16	HPRD Wnt	63	3.13388e-05	1.99116e-06
26	pid S1P2 pathway	154	3.19397e-05	2.271e-06
36	pid Fc-epsilon receptor I signaling in mast cells	260	3.48432e-05	2.271e-06
33	pid Neurotrophic factor-mediated Trk receptor signaling	228	3.62114e-05	3.13948e-06
35	KEGG Propanoate metabolism	251	3.96906e-05	3.13948e-06
81	Reactome Thiele2013 - Human metabolism global reconstruction (Recon 2)	811	4.21167e-05	3.35853e-06
33	KEGG Nitrogen metabolism	232	4.79427e-05	3.35853e-06
34	KEGG beta-Alanine metabolism	245	5.52303e-05	3.35853e-06
25	pid Posttranslational regulation of adherens junction stability and dissassembly	151	5.92696e-05	3.35853e-06
22	pid Signaling events mediated by PRL	122	6.21746e-05	3.35853e-06
28	KEGG Steroid biosynthesis	185	7.63894e-05	3.35853e-06
15	pid Validated targets of C-MYC transcriptional repression	61	7.7784e-05	3.35853e-06
36	pid Endothelins	274	8.43655e-05	3.35853e-06
34	KEGG Alanine, aspartate and glutamate metabolism	252	8.68164e-05	3.35853e-06
38	pid Signaling events mediated by Hepatocyte Growth Factor Receptor (c-Met)	298	9.05797e-05	3.35853e-06
23	SMPDB Succinic semialdehyde dehydrogenase deficiency	136	9.22202e-05	3.35853e-06
23	SMPDB Hyperinsulinism-Hyperammonemia Syndrome	136	9.22202e-05	3.35853e-06
23	SMPDB Homocarnosinosis	136	9.22202e-05	3.35853e-06
23	SMPDB Glutamate Metabolism	136	9.22202e-05	3.35853e-06
23	SMPDB 4-Hydroxybutyric Aciduria/Succinic Semialdehyde Dehydrogenase Deficiency	136	9.22202e-05	3.35853e-06
23	SMPDB 2-Hydroxyglutric Aciduria (D And L Form)	136	9.22202e-05	3.35853e-06
22	PANTHER Wnt signaling pathway	127	0.000100139	3.35853e-06
23	KEGG Ubiquinone and other terpenoid-quinone biosynthesis	137	0.000100799	3.35853e-06
38	KEGG Arginine and proline metabolism	300	0.000101449	3.35853e-06
35	pid IFN-gamma pathway	266	0.000102944	3.35853e-06
47	SMPDB Thiele2013 - Human metabolism global reconstruction (Recon 2)	407	0.00010529	5.39613e-06
19	Reactome Cytosolic tRNA aminoacylation	100	0.000120818	5.39613e-06
28	KEGG Primary bile acid biosynthesis	192	0.000127894	5.39613e-06
26	INOH VEGF signaling pathway ( VEGF signaling pathway )	171	0.000130665	7.26664e-06
26	INOH AKT(PKB)-Bad signaling ( IL-7 signaling(JAK1 JAK3 STAT5) )	171	0.000130665	7.26664e-06
26	INOH AKT(PKB)-Bad signaling ( EPO signaling pathway(JAK2 STAT1 STAT3 STAT5) )	171	0.000130665	7.26664e-06
33	pid VEGFR1 specific signals	250	0.000153409	7.26664e-06
15	pid Regulation of nuclear SMAD2/3 signaling	66	0.000154938	7.26664e-06
14	pid ATF-2 transcription factor network	58	0.000165471	7.26664e-06
28	pid Angiopoietin receptor Tie2-mediated signaling	197	0.000181264	7.26664e-06
26	KEGG Aminoacyl-tRNA biosynthesis	177	0.000203629	7.26664e-06
26	INOH Positive regulation of (Transcription of SOCS by STAT dimer) in JAK STAT pathway ( JAK-STAT pathway and regulation pathway Diagram )	177	0.000203629	7.26664e-06
20	PANTHER Alzheimer disease-presenilin pathway	115	0.000204422	7.26664e-06
32	KEGG Galactose metabolism	244	0.000211227	7.26664e-06
34	pid LPA receptor mediated events	267	0.000212414	7.26664e-06
14	Reactome TP53 Regulates Transcription of DNA Repair Genes	60	0.000217853	7.26664e-06
29	KEGG Pantothenate and CoA biosynthesis	211	0.000220931	7.26664e-06
25	pid TRAIL signaling pathway	168	0.000230598	7.26664e-06
23	pid mTOR signaling pathway	147	0.000232625	7.26664e-06
18	HumanCyc folate polyglutamylation	97	0.000235313	7.26664e-06
22	pid ErbB4 signaling events	137	0.000239447	7.26664e-06
24	pid Trk receptor signaling mediated by the MAPK pathway	159	0.000260578	7.26664e-06
11	Reactome Propanoate metabolism	37	0.000262036	7.26664e-06
30	KEGG Selenocompound metabolism	225	0.000263308	7.26664e-06
25	Reactome Resolution of Sister Chromatid Cohesion	170	0.000266552	7.26664e-06
29	pid Nongenotropic Androgen signaling	214	0.000267349	1.02432e-05
10	DIP BCR	30	0.000279753	1.02432e-05
8	BIND Wnt	17	0.000292614	1.02432e-05
32	KEGG Citrate cycle (TCA cycle)	250	0.000299331	1.02432e-05
27	KEGG Fatty acid degradation	194	0.000309228	1.02432e-05
30	Reactome Separation of Sister Chromatids	228	0.000315517	1.34132e-05
38	KEGG Drug metabolism - other enzymes	323	0.000337556	1.34132e-05
21	NetPath BCR	131	0.000340747	1.52325e-05
30	NetPath EGFR1	230	0.000355073	1.57858e-05
14	BIND TGF_beta_Receptor	65	0.000412246	1.57858e-05
23	SMPDB Warburg Effect	155	0.000425952	1.57858e-05
26	pid Thromboxane A2 receptor signaling	188	0.000430752	1.57858e-05
13	pid Ca2+ pathway	57	0.000456749	1.57858e-05
34	HumanCyc superpathway of methionine degradation	282	0.000473591	1.57858e-05
28	KEGG Cysteine and methionine metabolism	213	0.000501035	1.57858e-05
31	pid Netrin-mediated signaling events	248	0.000509833	1.57858e-05
20	SMPDB Gluconeogenesis	126	0.000525867	1.57858e-05
25	pid Arf6 downstream pathway	180	0.000527274	1.57858e-05
17	HumanCyc Propanoate metabolism	96	0.000548468	1.57858e-05
29	KEGG Ether lipid metabolism	227	0.000578442	1.57858e-05
13	pid Regulation of nuclear beta catenin signaling and target gene transcription	59	0.000588189	1.57858e-05
11	IntAct Wnt	42	0.000592583	1.57858e-05
31	NetPath TNFalpha	252	0.000630657	1.57858e-05
21	Reactome Signaling events mediated by Hepatocyte Growth Factor Receptor (c-Met)	139	0.000634287	1.57858e-05
9	KEGG Lysine catabolism	27	0.000636957	1.57858e-05
25	pid Plasma membrane estrogen receptor signaling	183	0.00063863	1.57858e-05
17	Reactome Major pathway of rRNA processing in the nucleolus	98	0.000659087	1.57858e-05
25	pid Integrins in angiogenesis	184	0.000679883	1.57858e-05
22	Reactome ErbB1 downstream signaling	151	0.000691573	1.57858e-05
10	Reactome Transcriptional activation of mitochondrial biogenesis	35	0.00069267	1.57858e-05
15	pid PAR4-mediated thrombin signaling events	79	0.000697538	1.57858e-05
32	pid FGF signaling pathway	266	0.000702974	1.57858e-05
25	Reactome Processing of DNA double-strand break ends	185	0.000723348	1.57858e-05
12	HumanCyc Purine ribonucleoside monophosphate biosynthesis	52	0.000738152	1.57858e-05
15	SMPDB Ammonia Recycling	80	0.000771785	1.57858e-05
11	Reactome Wnt signaling pathway	44	0.000794751	1.57858e-05
18	pid Syndecan-1-mediated signaling events	111	0.000839493	1.57858e-05
19	pid Cellular roles of Anthrax toxin	122	0.000875485	1.57858e-05
26	pid Class I PI3K signaling events	200	0.000895184	1.57858e-05
17	KEGG Terpenoid backbone biosynthesis	102	0.000935862	1.57858e-05
19	pid Syndecan-2-mediated signaling events	123	0.000945087	1.57858e-05
26	Reactome Gluconeogenesis	201	0.000947902	1.57858e-05
8	KEGG TCA cycle	22	0.000976472	1.57858e-05
24	Reactome EGFR Transactivation by Gastrin	179	0.00100242	1.57858e-05
24	pid Signaling events regulated by Ret tyrosine kinase	179	0.00100242	1.57858e-05
14	Reactome PAR1-mediated thrombin signaling events	73	0.00100588	1.57858e-05
18	Reactome HDR through MMEJ (alt-NHEJ)	114	0.00106741	1.57858e-05
19	KEGG Histidine metabolism	125	0.00109794	1.57858e-05
10	SMPDB Tyrosinemia Type 3 (TYRO3)	38	0.00111143	1.57858e-05
10	SMPDB Tyrosinemia Type 2 (or Richner-Hanhart syndrome)	38	0.00111143	1.57858e-05
10	SMPDB Phenylketonuria	38	0.00111143	1.57858e-05
10	SMPDB Phenylalanine and Tyrosine Metabolism	38	0.00111143	1.57858e-05
20	Reactome Signaling events mediated by VEGFR1 and VEGFR2	137	0.00119315	1.57858e-05
27	pid ErbB2/ErbB3 signaling events	217	0.00120077	1.57858e-05
27	HumanCyc purine nucleotides de novo biosynthesis	217	0.00120077	1.57858e-05
25	pid Nephrin/Neph1 signaling in the kidney podocyte	194	0.00122963	1.57858e-05
23	pid Regulation of Telomerase	171	0.00123045	1.57858e-05
18	pid S1P4 pathway	116	0.00124567	1.57858e-05
21	Reactome CD209 (DC-SIGN) signaling	149	0.00127245	1.57858e-05
29	HumanCyc valine degradation	242	0.00127369	1.57858e-05
18	HumanCyc tRNA charging	117	0.00134345	1.57858e-05
18	pid EPO signaling pathway	118	0.00144735	1.57858e-05
30	pid BCR signaling pathway	257	0.00146294	1.57858e-05
15	Reactome Mitotic Prometaphase	87	0.00149129	1.57858e-05
15	Reactome Angiogenesis	87	0.00149129	1.57858e-05
14	BioGRID BCR	77	0.00149315	1.57858e-05
22	pid PAR1-mediated thrombin signaling events	163	0.00151166	1.57858e-05
11	HumanCyc Metabolism of folate and pterines	49	0.00154437	1.57858e-05
18	SMPDB Triosephosphate isomerase	119	0.00155763	1.64714e-05
18	SMPDB Phosphoenolpyruvate carboxykinase deficiency 1 (PEPCK1)	119	0.00155763	1.64714e-05
18	SMPDB Glycogen Storage Disease Type 1A (GSD1A) or Von Gierke Disease	119	0.00155763	1.64714e-05
18	SMPDB Glycogenosis, Type IC	119	0.00155763	1.64714e-05
18	SMPDB Glycogenosis, Type IB	119	0.00155763	1.64714e-05
18	SMPDB Glycogenosis, Type IA. Von gierke disease	119	0.00155763	1.64714e-05
18	SMPDB Fructose-1,6-diphosphatase deficiency	119	0.00155763	1.64714e-05
18	Reactome Tie2 Signaling	119	0.00155763	1.64714e-05
18	Reactome SOS-mediated signalling	119	0.00155763	1.64714e-05
18	Reactome SHC-mediated cascade:FGFR4	119	0.00155763	1.64714e-05
18	Reactome SHC-mediated cascade:FGFR3	119	0.00155763	1.64714e-05
18	Reactome SHC-mediated cascade:FGFR2	119	0.00155763	1.64714e-05
18	Reactome SHC-mediated cascade:FGFR1	119	0.00155763	1.64714e-05
18	Reactome SHC1 events in ERBB4 signaling	119	0.00155763	1.64714e-05
18	Reactome SHC1 events in ERBB2 signaling	119	0.00155763	1.64714e-05
18	Reactome SHC1 events in EGFR signaling	119	0.00155763	1.64714e-05
18	Reactome GRB2 events in ERBB2 signaling	119	0.00155763	1.64714e-05
18	Reactome GRB2 events in EGFR signaling	119	0.00155763	1.64714e-05
18	Reactome FRS-mediated FGFR4 signaling	119	0.00155763	1.64714e-05
18	Reactome FRS-mediated FGFR3 signaling	119	0.00155763	1.64714e-05
18	Reactome FRS-mediated FGFR2 signaling	119	0.00155763	1.64714e-05
18	Reactome FRS-mediated FGFR1 signaling	119	0.00155763	1.64714e-05
16	HPRD BCR	98	0.00158524	1.64714e-05
13	SMPDB Malate-Aspartate Shuttle	68	0.00161079	1.64714e-05
15	Reactome Warburg Effect	88	0.00162766	1.64714e-05
28	pid CXCR3-mediated signaling events	235	0.0016313	1.64714e-05
27	Reactome FCERI mediated MAPK activation	223	0.00163509	2.15458e-05
30	HumanCyc &gamma	261	0.00175809	2.15458e-05
18	Reactome Signalling to RAS	121	0.00179842	2.15458e-05
9	NetPath ID	33	0.0018018	2.15458e-05
25	pid VEGFR3 signaling in lymphatic endothelium	202	0.0018958	2.15458e-05
20	HumanCyc methionine salvage cycle III	144	0.00189855	2.15458e-05
18	Reactome SHC-related events triggered by IGF1R	122	0.00192949	2.15458e-05
18	Reactome RAF/MAP kinase cascade	122	0.00192949	2.15458e-05
18	Reactome Insulin receptor signalling cascade	122	0.00192949	2.15458e-05
18	pid ALK1 signaling events	122	0.00192949	2.15458e-05
13	Reactome Glycine, serine and threonine metabolism	70	0.00196397	2.15458e-05
19	pid IL6-mediated signaling events	134	0.00205469	2.15458e-05
17	Reactome Purine ribonucleoside monophosphate biosynthesis	112	0.00205645	2.15458e-05
17	Reactome LPA receptor mediated events	112	0.00205645	2.15458e-05
12	HumanCyc Cytosolic tRNA aminoacylation	61	0.00210799	2.15458e-05
16	Reactome Recruitment and ATM-mediated phosphorylation of repair and signaling proteins at DNA double strand breaks	102	0.00217436	2.15458e-05
23	KEGG Lysine degradation	181	0.00218537	2.15458e-05
25	KEGG Starch and sucrose metabolism	205	0.00221043	2.15458e-05
17	Reactome PPARA activates gene expression	113	0.00221065	2.15458e-05
10	Reactome folate polyglutamylation	43	0.00222082	2.15458e-05
10	HumanCyc One carbon pool by folate	43	0.00222082	2.15458e-05
16	Reactome Glutathione synthesis and recycling	103	0.00234564	2.15458e-05
18	pid Role of Calcineurin-dependent NFAT signaling in lymphocytes	125	0.00236878	2.15458e-05
13	Reactome Metabolism of folate and pterines	72	0.00237488	2.15458e-05
9	Reactome Formation of Incision Complex in GG-NER	35	0.00242422	2.15458e-05
9	BIND BCR	35	0.00242422	2.15458e-05
8	NetPath IL5	27	0.00249045	2.15458e-05
10	pid Presenilin action in Notch and Wnt signaling	44	0.00251878	2.15458e-05
18	SMPDB Pyruvate Metabolism	126	0.00253153	2.15458e-05
18	SMPDB Pyruvate kinase deficiency	126	0.00253153	2.15458e-05
18	SMPDB Pyruvate Dehydrogenase Complex Deficiency	126	0.00253153	2.15458e-05
18	SMPDB Pyruvate Decarboxylase E1 Component Deficiency (PDHE1 Deficiency)	126	0.00253153	2.15458e-05
18	SMPDB Primary hyperoxaluria II, PH2	126	0.00253153	2.15458e-05
18	SMPDB Leigh Syndrome	126	0.00253153	2.15458e-05
23	HumanCyc superpathway of cholesterol biosynthesis	184	0.00256552	2.15458e-05
12	Reactome Arginine and proline metabolism	63	0.00258476	2.15458e-05
19	Reactome NCAM signaling for neurite out-growth	138	0.00265175	2.15458e-05
29	Reactome GPVI-mediated activation cascade	258	0.00265811	2.15458e-05
15	SMPDB Urea Cycle	94	0.00266655	2.15458e-05
15	SMPDB Ornithine Transcarbamylase Deficiency (OTC Deficiency)	94	0.00266655	2.15458e-05
15	SMPDB Citrullinemia Type I	94	0.00266655	2.15458e-05
15	SMPDB Carbamoyl Phosphate Synthetase Deficiency	94	0.00266655	2.15458e-05
15	SMPDB Argininosuccinic Aciduria	94	0.00266655	2.15458e-05
15	SMPDB Argininemia	94	0.00266655	2.15458e-05
11	SMPDB Propanoate metabolism	54	0.00275568	2.15458e-05
11	Reactome Methionine salvage pathway	54	0.00275568	2.15458e-05
14	Reactome Regulation of TP53 Activity through Phosphorylation	84	0.00277956	2.15458e-05
32	KEGG Glycine, serine and threonine metabolism	297	0.0027854	2.15458e-05
9	Reactome beta-Alanine metabolism	36	0.00278977	2.15458e-05
9	NetPath Hedgehog	36	0.00278977	2.15458e-05
9	KEGG folate polyglutamylation	36	0.00278977	2.15458e-05
18	pid S1P3 pathway	128	0.00288325	2.15458e-05
8	Reactome TCA cycle	28	0.00293107	2.15458e-05
27	pid TCR signaling in na簿ve CD4+ T cells	236	0.0030158	2.15458e-05
18	pid EPHA2 forward signaling	129	0.00307281	2.15458e-05
21	Reactome PDGFR-beta signaling pathway	164	0.00312524	2.15458e-05
12	pid SHP2 signaling	65	0.00313998	2.15458e-05
27	Reactome Signaling by FGFR3 fusions in cancer	237	0.00315161	2.15458e-05
27	Reactome Downstream signal transduction	237	0.00315161	2.15458e-05
27	Reactome Constitutive Signaling by EGFRvIII	237	0.00315161	2.15458e-05
19	Reactome CLEC7A (Dectin-1) signaling	141	0.00318279	2.15458e-05
9	pid Regulation of CDC42 activity	37	0.00319465	2.15458e-05
27	Reactome Signaling by FGFR4 in disease	238	0.00329215	2.15458e-05
27	Reactome Signaling by FGFR3 point mutants in cancer	238	0.00329215	2.15458e-05
27	Reactome Signaling by FGFR2 in disease	238	0.00329215	2.15458e-05
27	Reactome Signaling by FGFR1 in disease	238	0.00329215	2.15458e-05
27	Reactome Constitutive Signaling by Ligand-Responsive EGFR Cancer Variants	238	0.00329215	2.15458e-05
21	pid RAC1 signaling pathway	165	0.00329968	2.15458e-05
17	pid Ephrin B reverse signaling	119	0.00333614	2.15458e-05
7	Reactome Notch signaling pathway	21	0.00336347	2.15458e-05
7	HumanCyc hypusine biosynthesis	21	0.00336347	2.15458e-05
7	DIP Wnt	21	0.00336347	2.15458e-05
12	PANTHER Fc-epsilon receptor I signaling in mast cells	66	0.00344934	2.15458e-05
22	KEGG Tryptophan metabolism	178	0.00349221	2.15458e-05
17	SMPDB Xanthinuria type II	120	0.0035603	2.15458e-05
17	SMPDB Xanthinuria type I	120	0.0035603	2.15458e-05
17	SMPDB Xanthine Dehydrogenase Deficiency (Xanthinuria)	120	0.0035603	2.15458e-05
17	SMPDB Purine Nucleoside Phosphorylase Deficiency	120	0.0035603	2.15458e-05
17	SMPDB Purine Metabolism	120	0.0035603	2.15458e-05
17	SMPDB Myoadenylate deaminase deficiency	120	0.0035603	2.15458e-05
17	SMPDB Molybdenum Cofactor Deficiency	120	0.0035603	2.15458e-05
17	SMPDB Mitochondrial DNA depletion syndrome	120	0.0035603	2.15458e-05
17	SMPDB Lesch-Nyhan Syndrome (LNS)	120	0.0035603	2.15458e-05
17	SMPDB Gout or Kelley-Seegmiller Syndrome	120	0.0035603	2.15458e-05
17	SMPDB AICA-Ribosiduria	120	0.0035603	2.15458e-05
17	SMPDB Adenylosuccinate Lyase Deficiency	120	0.0035603	2.15458e-05
17	SMPDB Adenosine Deaminase Deficiency	120	0.0035603	2.15458e-05
17	SMPDB Adenine phosphoribosyltransferase deficiency (APRT)	120	0.0035603	2.15458e-05
10	Reactome Constitutive Signaling by NOTCH1 PEST Domain Mutants	47	0.00359434	2.15458e-05
10	Reactome Constitutive Signaling by NOTCH1 HD+PEST Domain Mutants	47	0.00359434	2.15458e-05
10	pid Signaling events mediated by HDAC Class II	47	0.00359434	2.15458e-05
15	Reactome RHO GTPases Activate Formins	98	0.00360432	2.15458e-05
15	HumanCyc superpathway of choline degradation to L-serine	98	0.00360432	2.15458e-05
16	Reactome Nephrin/Neph1 signaling in the kidney podocyte	109	0.0036057	2.15458e-05
16	pid Regulation of Androgen receptor activity	109	0.0036057	2.15458e-05
9	pid PLC-mediated hydrolysis of PIP2	38	0.00364118	2.72827e-05
9	pid Notch signaling pathway	38	0.00364118	2.72827e-05
9	pid G beta:gamma signalling through PLC beta	38	0.00364118	2.72827e-05
9	pid G alpha (q) signalling events	38	0.00364118	2.72827e-05
9	INOH Angiogenesis	38	0.00364118	2.72827e-05
12	SMPDB Histidinemia	67	0.00378108	2.72827e-05
12	SMPDB Histidine Metabolism	67	0.00378108	2.72827e-05
12	Reactome purine nucleotides de novo biosynthesis	67	0.00378108	2.72827e-05
19	pid IL2-mediated signaling events	144	0.00379278	2.72827e-05
16	pid Arf1 pathway	110	0.00385821	2.72827e-05
22	KEGG N-Glycan biosynthesis	180	0.00386371	2.72827e-05
18	pid S1P1 pathway	133	0.00392919	2.72827e-05
24	Reactome Regulation of actin dynamics for phagocytic cup formation	205	0.00397275	2.72827e-05
13	SMPDB Pyruvate Carboxylase Deficiency	78	0.00401218	2.72827e-05
13	SMPDB Primary Hyperoxaluria Type I	78	0.00401218	2.72827e-05
13	SMPDB Lactic Acidemia	78	0.00401218	2.72827e-05
13	SMPDB Alanine Metabolism	78	0.00401218	2.72827e-05
7	BioGRID IL5	22	0.00403045	2.72827e-05
9	pid Wnt signaling pathway	39	0.0041316	2.72827e-05
11	pid Hedgehog signaling events mediated by Gli proteins	58	0.00415757	2.72827e-05
23	HPRD TNFalpha	194	0.00422043	2.72827e-05
19	Reactome TP53 Regulates Metabolic Genes	146	0.00424666	2.72827e-05
25	KEGG Glycosylphosphatidylinositol(GPI)-anchor biosynthesis	219	0.00426687	2.72827e-05
21	HumanCyc superpathway of geranylgeranyldiphosphate biosynthesis I (via mevalonate)	170	0.00428766	2.72827e-05
30	Reactome Signaling by SCF-KIT	283	0.00434805	2.72827e-05
24	pid CXCR4-mediated signaling events	207	0.00435141	2.72827e-05
12	INOH One carbon pool by folate	69	0.00451537	2.72827e-05
17	Reactome BCR signaling pathway	124	0.00457388	2.72827e-05
11	pid EGFR Transactivation by Gastrin	59	0.00457815	2.72827e-05
8	HumanCyc Lysine catabolism	31	0.0045914	2.72827e-05
9	Reactome Alzheimer disease-presenilin pathway	40	0.00466812	2.72827e-05
13	pid N-cadherin signaling events	80	0.00471216	2.72827e-05
15	KEGG Valine, leucine and isoleucine biosynthesis	102	0.00477418	2.72827e-05
14	Reactome Plasma membrane estrogen receptor signaling	91	0.00478769	2.72827e-05
5	Reactome tetrahydrobiopterin de novo biosynthesis	9	0.00489146	2.72827e-05
5	PANTHER p38MAPK events	9	0.00489146	2.72827e-05
5	HumanCyc Tetrahydrobiopterin (BH4) synthesis, recycling, salvage and regulation	9	0.00489146	2.72827e-05
12	pid p73 transcription factor network	70	0.0049197	2.72827e-05
18	Reactome Amino acid synthesis and interconversion (transamination)	137	0.00495651	2.72827e-05
10	Reactome G alpha (12/13) signalling events	50	0.00497637	2.72827e-05
19	IntAct TNFalpha	149	0.00500326	2.72827e-05
20	BioGRID EGFR1	161	0.00500832	2.72827e-05
13	pid Angiogenesis	81	0.00509425	2.72827e-05
21	pid PDGFR-alpha signaling pathway	174	0.00522843	2.72827e-05
9	Reactome Glucose-Alanine Cycle	41	0.00525286	2.72827e-05
9	Reactome Cobalamin (Cbl, vitamin B12) transport and metabolism	41	0.00525286	2.72827e-05
8	HumanCyc N-Glycan biosynthesis	32	0.0052686	2.72827e-05
20	pid IL2 signaling events mediated by PI3K	162	0.00526921	2.72827e-05
20	pid GMCSF-mediated signaling events	162	0.00526921	2.72827e-05
23	KEGG Butanoate metabolism	199	0.00530592	2.72827e-05
6	PhosphoSite PLK1 signaling events	16	0.00534213	2.72827e-05
10	Reactome Pyruvate Metabolism	51	0.00551239	2.72827e-05
10	Reactome Pyruvate kinase deficiency	51	0.00551239	2.72827e-05
10	Reactome Pyruvate Dehydrogenase Complex Deficiency	51	0.00551239	2.72827e-05
10	Reactome Pyruvate Decarboxylase E1 Component Deficiency (PDHE1 Deficiency)	51	0.00551239	2.72827e-05
10	Reactome Primary hyperoxaluria II, PH2	51	0.00551239	2.72827e-05
10	Reactome Leigh Syndrome	51	0.00551239	2.72827e-05
18	PANTHER Thiele2013 - Human metabolism global reconstruction (Recon 2)	139	0.00553991	2.72827e-05
29	Reactome DAP12 signaling	277	0.00561565	2.72827e-05
7	Reactome Presenilin action in Notch and Wnt signaling	24	0.00563108	2.72827e-05
7	pid Constitutive Signaling by NOTCH1 PEST Domain Mutants	24	0.00563108	2.72827e-05
7	pid Constitutive Signaling by NOTCH1 HD+PEST Domain Mutants	24	0.00563108	2.72827e-05
25	pid TCR signaling in na簿ve CD8+ T cells	226	0.00573086	2.72827e-05
9	KEGG Lysine biosynthesis	42	0.00588786	2.72827e-05
8	pid Acetylcholine regulates insulin secretion	33	0.00601279	2.72827e-05
8	KEGG Citric acid cycle (TCA cycle)	33	0.00601279	2.72827e-05
8	INOH Histidinemia	33	0.00601279	2.72827e-05
8	INOH Histidine Metabolism	33	0.00601279	2.72827e-05
16	Reactome Rho GTPase cycle	117	0.00601741	2.72827e-05
11	SMPDB Zoledronate Action Pathway	62	0.00602646	2.72827e-05
11	SMPDB Wolman disease	62	0.00602646	2.72827e-05
11	SMPDB Steroid Biosynthesis	62	0.00602646	2.72827e-05
11	SMPDB Smith-Lemli-Opitz Syndrome (SLOS)	62	0.00602646	2.72827e-05
11	SMPDB Simvastatin Action Pathway	62	0.00602646	2.72827e-05
11	SMPDB Rosuvastatin Action Pathway	62	0.00602646	2.72827e-05
11	SMPDB Risedronate Action Pathway	62	0.00602646	2.72827e-05
11	SMPDB Pravastatin Action Pathway	62	0.00602646	2.72827e-05
11	SMPDB Pamidronate Action Pathway	62	0.00602646	2.72827e-05
11	SMPDB Mevalonic aciduria	62	0.00602646	2.72827e-05
11	SMPDB Lysosomal Acid Lipase Deficiency (Wolman Disease)	62	0.00602646	2.72827e-05
11	SMPDB Lovastatin Action Pathway	62	0.00602646	2.72827e-05
11	SMPDB Ibandronate Action Pathway	62	0.00602646	2.72827e-05
11	SMPDB Hyper-IgD syndrome	62	0.00602646	2.72827e-05
11	SMPDB Hypercholesterolemia	62	0.00602646	2.72827e-05
11	SMPDB Fluvastatin Action Pathway	62	0.00602646	2.72827e-05
11	SMPDB Desmosterolosis	62	0.00602646	2.72827e-05
11	SMPDB Chondrodysplasia Punctata II, X Linked Dominant (CDPX2)	62	0.00602646	2.72827e-05
11	SMPDB Cholesteryl ester storage disease	62	0.00602646	2.72827e-05
11	SMPDB CHILD Syndrome	62	0.00602646	2.72827e-05
11	SMPDB Cerivastatin Action Pathway	62	0.00602646	2.72827e-05
11	SMPDB Atorvastatin Action Pathway	62	0.00602646	2.72827e-05
11	SMPDB Alendronate Action Pathway	62	0.00602646	2.72827e-05
21	BioGRID TNFalpha	177	0.00602945	2.72827e-05
10	pid Regulation of retinoblastoma protein	52	0.00608853	2.72827e-05
22	HumanCyc bile acid biosynthesis, neutral pathway	190	0.00619207	2.72827e-05
20	HPRD EGFR1	166	0.0064148	2.72827e-05
5	Reactome ATF6-alpha activates chaperone genes	10	0.00644733	2.72827e-05
5	KEGG 2-oxoglutarate decarboxylation to succinyl-CoA	10	0.00644733	2.72827e-05
17	DIP TNFalpha	130	0.00648112	2.72827e-05
6	INOH Glyoxylate and dicarboxylate metabolism	17	0.00650893	2.72827e-05
7	HumanCyc Methotrexate Action Pathway	25	0.00657417	2.72827e-05
7	HumanCyc Folate Metabolism	25	0.00657417	2.72827e-05
7	HumanCyc Folate malabsorption, hereditary	25	0.00657417	2.72827e-05
7	HPRD IL5	25	0.00657417	2.72827e-05
9	Reactome PDGFR-alpha signaling pathway	43	0.00657506	2.72827e-05
21	pid Noncanonical Wnt signaling pathway	179	0.00661152	2.72827e-05
10	Reactome XBP1(S) activates chaperone genes	53	0.00670616	2.72827e-05
16	pid Regulation of Ras family activation	119	0.00677143	2.72827e-05
14	Reactome Neurotrophic factor-mediated Trk receptor signaling	96	0.00677309	2.72827e-05
12	SMPDB Ureidopropionase deficiency	74	0.00680467	2.72827e-05
12	SMPDB GABA-Transaminase Deficiency	74	0.00680467	2.72827e-05
12	SMPDB Carnosinuria, carnosinemia	74	0.00680467	2.72827e-05
12	SMPDB Beta-Alanine Metabolism	74	0.00680467	2.72827e-05
12	Reactome Sema4D induced cell migration and growth-cone collapse	74	0.00680467	2.72827e-05
8	KEGG Histidinemia	34	0.00682676	2.72827e-05
8	KEGG Histidine Metabolism	34	0.00682676	2.72827e-05
8	HumanCyc Cholesterol biosynthesis	34	0.00682676	2.72827e-05
13	SMPDB Glutaric Aciduria Type I	85	0.00685212	2.72827e-05
18	PANTHER PDGF signaling pathway	143	0.00685682	2.72827e-05
16	HumanCyc cysteine biosynthesis	120	0.00717304	2.72827e-05
18	PANTHER Cadherin signaling pathway	144	0.00721877	2.72827e-05
27	KEGG Valine, leucine and isoleucine degradation	258	0.00725205	2.72827e-05
10	HumanCyc Methylenetetrahydrofolate Reductase Deficiency (MTHFRD)	54	0.00736656	2.72827e-05
20	pid FAS (CD95) signaling pathway	169	0.00738646	2.72827e-05
15	Reactome Netrin-mediated signaling events	109	0.00746835	2.72827e-05
15	Reactome IFN-gamma pathway	109	0.00746835	2.72827e-05
25	KEGG Porphyrin and chlorophyll metabolism	233	0.00753847	2.72827e-05
8	Reactome Pyruvate Carboxylase Deficiency	35	0.0077131	2.72827e-05
8	Reactome Primary Hyperoxaluria Type I	35	0.0077131	2.72827e-05
8	Reactome Lactic Acidemia	35	0.0077131	2.72827e-05
8	Reactome Alanine Metabolism	35	0.0077131	2.72827e-05
8	pid Activation of NF-kappaB in B cells	35	0.0077131	2.72827e-05
23	pid Trk receptor signaling mediated by PI3K and PLC-gamma	208	0.00776564	2.72827e-05
6	Reactome inosine-5'-phosphate biosynthesis	18	0.00783042	2.72827e-05
19	HumanCyc ketolysis	158	0.00787725	2.72827e-05
12	SMPDB Glucose-Alanine Cycle	76	0.00791875	2.72827e-05
12	Reactome Transcriptional regulation of white adipocyte differentiation	76	0.00791875	2.72827e-05
16	PANTHER Alzheimer disease-amyloid secretase pathway	122	0.00802704	2.72827e-05
10	IntAct BCR	55	0.00807096	2.72827e-05
20	HumanCyc superpathway of conversion of glucose to acetyl CoA and entry into the TCA cycle	171	0.00809042	2.72827e-05
9	Reactome Valine, leucine and isoleucine degradation	45	0.00811317	2.72827e-05
9	PANTHER Noncanonical Wnt signaling pathway	45	0.00811317	2.72827e-05
9	KEGG Biotin metabolism	45	0.00811317	2.72827e-05
14	Reactome Sulfur amino acid metabolism	99	0.00821623	2.72827e-05
5	Reactome Signaling by NOTCH4	11	0.00827734	2.72827e-05
5	INOH 2-oxoglutarate decarboxylation to succinyl-CoA	11	0.00827734	2.72827e-05
5	HumanCyc 2-oxoglutarate decarboxylation to succinyl-CoA	11	0.00827734	2.72827e-05
13	Reactome Nongenotropic Androgen signaling	88	0.00842865	2.72827e-05
13	pid JNK signaling in the CD4+ TCR pathway	88	0.00842865	2.72827e-05
11	SMPDB Mitochondrial Beta-Oxidation of Medium Chain Saturated Fatty Acids	66	0.0084316	2.72827e-05
11	Reactome Succinic semialdehyde dehydrogenase deficiency	66	0.0084316	2.72827e-05
11	Reactome Hyperinsulinism-Hyperammonemia Syndrome	66	0.0084316	2.72827e-05
11	Reactome Homocarnosinosis	66	0.0084316	2.72827e-05
11	Reactome Glutamate Metabolism	66	0.0084316	2.72827e-05
11	Reactome 4-Hydroxybutyric Aciduria/Succinic Semialdehyde Dehydrogenase Deficiency	66	0.0084316	2.72827e-05
11	Reactome 2-Hydroxyglutric Aciduria (D And L Form)	66	0.0084316	2.72827e-05
11	pid AP-1 transcription factor network	66	0.0084316	2.72827e-05
11	HumanCyc beta-Alanine metabolism	66	0.0084316	2.72827e-05
8	Reactome TRAIL signaling pathway	36	0.00867416	2.72827e-05
24	Reactome Activation of NF-kappaB in B cells	224	0.00875593	2.72827e-05
10	KEGG Warburg Effect	56	0.0088205	2.72827e-05
13	KEGG valine degradation	89	0.00900627	2.72827e-05
11	Reactome Fatty Acids bound to GPR40 (FFAR1) regulate insulin secretion	67	0.00912374	2.72827e-05
33	Reactome Downstream TCR signaling	346	0.00921771	2.72827e-05
18	pid Downstream signaling in na簿ve CD8+ T cells	149	0.00923612	2.72827e-05
14	Reactome CDC42 signaling events	101	0.00929081	2.72827e-05
6	KEGG Steroids metabolism ( Steroids metabolism )	19	0.00931241	2.72827e-05
22	pid IL8- and CXCR2-mediated signaling events	200	0.00941711	2.72827e-05
15	Reactome Acetylcholine regulates insulin secretion	113	0.00942266	2.72827e-05
16	HumanCyc Glycine, serine and threonine metabolism	125	0.00943934	2.72827e-05
19	HumanCyc mevalonate pathway	162	0.00947422	2.72827e-05
10	SMPDB Amino acid synthesis and interconversion (transamination)	57	0.00961621	2.72827e-05
10	Reactome Asymmetric localization of PCP proteins	57	0.00961621	2.72827e-05
18	HumanCyc acetate conversion to acetyl-CoA	150	0.00968249	2.72827e-05
12	PANTHER Ca2+ pathway	79	0.00982004	2.72827e-05
11	pid FoxO family signaling	68	0.00985382	2.72827e-05
9	SMPDB One carbon pool by folate	47	0.00988019	2.72827e-05
9	Reactome Triosephosphate isomerase	47	0.00988019	2.72827e-05
9	Reactome Phosphoenolpyruvate carboxykinase deficiency 1 (PEPCK1)	47	0.00988019	2.72827e-05
9	Reactome Glycogen Storage Disease Type 1A (GSD1A) or Von Gierke Disease	47	0.00988019	2.72827e-05
9	Reactome Glycogenosis, Type IC	47	0.00988019	2.72827e-05
9	Reactome Glycogenosis, Type IB	47	0.00988019	2.72827e-05
9	Reactome Glycogenosis, Type IA. Von gierke disease	47	0.00988019	2.72827e-05
9	Reactome Fructose-1,6-diphosphatase deficiency	47	0.00988019	2.72827e-05
15	pid Integrin-linked kinase signaling	114	0.00996186	2.72827e-05
7	HumanCyc Ubiquinone and other terpenoid-quinone biosynthesis	28	0.0100223	2.72827e-05
17	SMPDB Thioguanine Action Pathway	139	0.0103377	2.72827e-05
17	SMPDB Mercaptopurine Action Pathway	139	0.0103377	2.72827e-05
17	SMPDB Azathioprine Action Pathway	139	0.0103377	2.72827e-05
34	Reactome Ca2+ pathway	364	0.0103519	2.72827e-05
5	pid Cyclin D associated events in G1	12	0.0103906	2.72827e-05
5	KEGG Cobalamin (Cbl, vitamin B12) transport and metabolism	12	0.0103906	2.72827e-05
5	KEGG Cholesterol biosynthesis	12	0.0103906	2.72827e-05
14	Reactome VEGFR1 specific signals	103	0.0104589	2.72827e-05
10	SMPDB Valine, leucine and isoleucine degradation	58	0.010459	2.72827e-05
10	INOH Xanthinuria type II	58	0.010459	2.72827e-05
10	INOH Xanthinuria type I	58	0.010459	2.72827e-05
10	INOH Xanthine Dehydrogenase Deficiency (Xanthinuria)	58	0.010459	2.72827e-05
10	INOH Thioguanine Action Pathway	58	0.010459	2.72827e-05
10	INOH Purine Nucleoside Phosphorylase Deficiency	58	0.010459	2.72827e-05
10	INOH Purine Metabolism	58	0.010459	2.72827e-05
10	INOH Myoadenylate deaminase deficiency	58	0.010459	2.72827e-05
10	INOH Molybdenum Cofactor Deficiency	58	0.010459	2.72827e-05
10	INOH Mitochondrial DNA depletion syndrome	58	0.010459	2.72827e-05
10	INOH Mercaptopurine Action Pathway	58	0.010459	2.72827e-05
10	INOH Lesch-Nyhan Syndrome (LNS)	58	0.010459	2.72827e-05
10	INOH Gout or Kelley-Seegmiller Syndrome	58	0.010459	2.72827e-05
10	INOH Azathioprine Action Pathway	58	0.010459	2.72827e-05
10	INOH AICA-Ribosiduria	58	0.010459	2.72827e-05
10	INOH Adenylosuccinate Lyase Deficiency	58	0.010459	2.72827e-05
10	INOH Adenosine Deaminase Deficiency	58	0.010459	2.72827e-05
10	INOH Adenine phosphoribosyltransferase deficiency (APRT)	58	0.010459	2.72827e-05
12	pid Validated targets of C-MYC transcriptional activation	80	0.0105175	2.72827e-05
15	PANTHER Metabolic pathways	115	0.0105219	2.72827e-05
11	HumanCyc Nitrogen metabolism	69	0.0106225	2.72827e-05
8	Reactome Tryptophan metabolism	38	0.0108285	2.72827e-05
8	pid Fanconi anemia pathway	38	0.0108285	2.72827e-05
8	KEGG Propanoate Metabolism	38	0.0108285	2.72827e-05
8	KEGG Methylmalonic Aciduria Due to Cobalamin-Related Disorders	38	0.0108285	2.72827e-05
8	KEGG Malonyl-coa decarboxylase deficiency	38	0.0108285	2.72827e-05
8	KEGG Malonic Aciduria	38	0.0108285	2.72827e-05
8	INOH Steroids metabolism ( Steroids metabolism )	38	0.0108285	2.72827e-05
8	HumanCyc TCA cycle	38	0.0108285	2.72827e-05
8	HumanCyc Ammonia Recycling	38	0.0108285	2.72827e-05
9	SMPDB beta-Alanine metabolism	48	0.010853	2.72827e-05
9	pid Effects of Botulinum toxin	48	0.010853	2.72827e-05
13	pid p75(NTR)-mediated signaling	92	0.010902	2.72827e-05
6	Reactome Transfer of Acetyl Groups into Mitochondria	20	0.0109595	2.72827e-05
6	pid Response to elevated platelet cytosolic Ca2+	20	0.0109595	2.72827e-05
14	Reactome PLC-mediated hydrolysis of PIP2	104	0.0110789	2.72827e-05
14	Reactome G beta:gamma signalling through PLC beta	104	0.0110789	2.72827e-05
14	Reactome CXCR4-mediated signaling events	104	0.0110789	2.72827e-05
14	HumanCyc Arginine and proline metabolism	104	0.0110789	2.72827e-05
19	HumanCyc oxidative ethanol degradation III	166	0.0112832	2.72827e-05
19	HumanCyc ethanol degradation II	166	0.0112832	2.72827e-05
10	Reactome Verapamil Action Pathway	59	0.0113498	2.72827e-05
10	Reactome Tocainide Action Pathway	59	0.0113498	2.72827e-05
10	Reactome Timolol Action Pathway	59	0.0113498	2.72827e-05
10	Reactome Sotalol Action Pathway	59	0.0113498	2.72827e-05
10	Reactome Quinidine Action Pathway	59	0.0113498	2.72827e-05
10	Reactome Propranolol Action Pathway	59	0.0113498	2.72827e-05
10	Reactome Procainamide (Antiarrhythmic) Action Pathway	59	0.0113498	2.72827e-05
10	Reactome Practolol Action Pathway	59	0.0113498	2.72827e-05
10	Reactome Pindolol Action Pathway	59	0.0113498	2.72827e-05
10	Reactome Phenytoin (Antiarrhythmic) Action Pathway	59	0.0113498	2.72827e-05
10	Reactome Penbutolol Action Pathway	59	0.0113498	2.72827e-05
10	Reactome Oxprenolol Action Pathway	59	0.0113498	2.72827e-05
10	Reactome Nitrendipine Action Pathway	59	0.0113498	2.72827e-05
10	Reactome Nisoldipine Action Pathway	59	0.0113498	2.72827e-05
10	Reactome Nimodipine Action Pathway	59	0.0113498	2.72827e-05
10	Reactome Nifedipine Action Pathway	59	0.0113498	2.72827e-05
10	Reactome Nebivolol Action Pathway	59	0.0113498	2.72827e-05
10	Reactome Nadolol Action Pathway	59	0.0113498	2.72827e-05
10	Reactome Muscle/Heart Contraction	59	0.0113498	2.72827e-05
10	Reactome Mexiletine Action Pathway	59	0.0113498	2.72827e-05
10	Reactome Metoprolol Action Pathway	59	0.0113498	2.72827e-05
10	Reactome Metipranolol Action Pathway	59	0.0113498	2.72827e-05
10	Reactome Lidocaine (Antiarrhythmic) Action Pathway	59	0.0113498	2.72827e-05
10	Reactome Levobunolol Action Pathway	59	0.0113498	2.72827e-05
10	Reactome Labetalol Action Pathway	59	0.0113498	2.72827e-05
10	Reactome Isradipine Action Pathway	59	0.0113498	2.72827e-05
10	Reactome Isoprenaline Action Pathway	59	0.0113498	2.72827e-05
10	Reactome Ibutilide Action Pathway	59	0.0113498	2.72827e-05
10	Reactome Fosphenytoin (Antiarrhythmic) Action Pathway	59	0.0113498	2.72827e-05
10	Reactome Flecainide Action Pathway	59	0.0113498	2.72827e-05
10	Reactome Felodipine Action Pathway	59	0.0113498	2.72827e-05
10	Reactome Esmolol Action Pathway	59	0.0113498	2.72827e-05
10	Reactome Epinephrine Action Pathway	59	0.0113498	2.72827e-05
10	Reactome Dobutamine Action Pathway	59	0.0113498	2.72827e-05
10	Reactome Disopyramide Action Pathway	59	0.0113498	2.72827e-05
10	Reactome Diltiazem Action Pathway	59	0.0113498	2.72827e-05
10	Reactome Carvedilol Action Pathway	59	0.0113498	2.72827e-05
10	Reactome Carteolol Action Pathway	59	0.0113498	2.72827e-05
10	Reactome Bupranolol Action Pathway	59	0.0113498	2.72827e-05
10	Reactome Bopindolol Action Pathway	59	0.0113498	2.72827e-05
10	Reactome Bisoprolol Action Pathway	59	0.0113498	2.72827e-05
10	Reactome Bevantolol Action Pathway	59	0.0113498	2.72827e-05
10	Reactome Betaxolol Action Pathway	59	0.0113498	2.72827e-05
10	Reactome Atenolol Action Pathway	59	0.0113498	2.72827e-05
10	Reactome Arbutamine Action Pathway	59	0.0113498	2.72827e-05
10	Reactome Amlodipine Action Pathway	59	0.0113498	2.72827e-05
10	Reactome Amiodarone Action Pathway	59	0.0113498	2.72827e-05
10	Reactome Alprenolol Action Pathway	59	0.0113498	2.72827e-05
10	Reactome Acebutolol Action Pathway	59	0.0113498	2.72827e-05
7	Reactome Biosynthesis of the N-glycan precursor (dolichol lipid-linked oligosaccharide, LLO) and transfer to a nascent protein	29	0.0113884	2.72827e-05
7	pid ATM pathway	29	0.0113884	2.72827e-05
11	SMPDB Prolinemia Type II	70	0.0114305	2.72827e-05
11	SMPDB Prolidase Deficiency (PD)	70	0.0114305	2.72827e-05
11	SMPDB Ornithine Aminotransferase Deficiency (OAT Deficiency)	70	0.0114305	2.72827e-05
11	SMPDB L-arginine:glycine amidinotransferase deficiency	70	0.0114305	2.72827e-05
11	SMPDB Hyperprolinemia Type II	70	0.0114305	2.72827e-05
11	SMPDB Hyperprolinemia Type I	70	0.0114305	2.72827e-05
11	SMPDB Hyperornithinemia with gyrate atrophy (HOGA)	70	0.0114305	2.72827e-05
11	SMPDB Hyperornithinemia-hyperammonemia-homocitrullinuria [HHH-syndrome]	70	0.0114305	2.72827e-05
11	SMPDB Guanidinoacetate Methyltransferase Deficiency (GAMT Deficiency)	70	0.0114305	2.72827e-05
11	SMPDB Creatine deficiency, guanidinoacetate methyltransferase deficiency	70	0.0114305	2.72827e-05
11	SMPDB Arginine: Glycine Amidinotransferase Deficiency (AGAT Deficiency)	70	0.0114305	2.72827e-05
11	SMPDB Arginine and Proline Metabolism	70	0.0114305	2.72827e-05
11	HumanCyc glycine betaine degradation	70	0.0114305	2.72827e-05
16	HumanCyc -glutamyl cycle	129	0.0115779	2.72827e-05
4	KEGG (R)-Methyl-malonyl-CoA = Succinyl-CoA ( Propanoate metabolism )	6	0.011763	2.72827e-05
20	INOH Purine nucleotides and Nucleosides metabolism ( Purine nucleotides and Nucleosides metabolism )	180	0.011848	2.72827e-05
9	Reactome Urea Cycle	49	0.0118867	2.72827e-05
9	Reactome Ornithine Transcarbamylase Deficiency (OTC Deficiency)	49	0.0118867	2.72827e-05
9	Reactome Citrullinemia Type I	49	0.0118867	2.72827e-05
9	Reactome Carbamoyl Phosphate Synthetase Deficiency	49	0.0118867	2.72827e-05
9	Reactome Argininosuccinic Aciduria	49	0.0118867	2.72827e-05
9	Reactome Argininemia	49	0.0118867	2.72827e-05
9	pid CLEC7A (Dectin-1) signaling	49	0.0118867	2.72827e-05
8	Reactome Xanthinuria type II	39	0.0120252	2.72827e-05
8	Reactome Xanthinuria type I	39	0.0120252	2.72827e-05
8	Reactome Xanthine Dehydrogenase Deficiency (Xanthinuria)	39	0.0120252	2.72827e-05
8	Reactome Purine Nucleoside Phosphorylase Deficiency	39	0.0120252	2.72827e-05
8	Reactome Purine Metabolism	39	0.0120252	2.72827e-05
8	Reactome Myoadenylate deaminase deficiency	39	0.0120252	2.72827e-05
8	Reactome Molybdenum Cofactor Deficiency	39	0.0120252	2.72827e-05
8	Reactome Mitochondrial DNA depletion syndrome	39	0.0120252	2.72827e-05
8	Reactome Lesch-Nyhan Syndrome (LNS)	39	0.0120252	2.72827e-05
8	Reactome Gout or Kelley-Seegmiller Syndrome	39	0.0120252	2.72827e-05
8	Reactome Citrate cycle (TCA cycle)	39	0.0120252	2.72827e-05
8	Reactome AICA-Ribosiduria	39	0.0120252	2.72827e-05
8	Reactome Adenylosuccinate Lyase Deficiency	39	0.0120252	2.72827e-05
8	Reactome Adenosine Deaminase Deficiency	39	0.0120252	2.72827e-05
8	Reactome Adenine phosphoribosyltransferase deficiency (APRT)	39	0.0120252	2.72827e-05
8	PANTHER PDGFR-alpha signaling pathway	39	0.0120252	2.72827e-05
8	INOH TCA cycle	39	0.0120252	2.72827e-05
22	pid RhoA signaling pathway	207	0.0122738	2.72827e-05
11	SMPDB Transaldolase deficiency	71	0.0122782	2.72827e-05
11	SMPDB Saccharopinuria/Hyperlysinemia II	71	0.0122782	2.72827e-05
11	SMPDB Ribose-5-phosphate isomerase deficiency	71	0.0122782	2.72827e-05
11	SMPDB Pyridoxine dependency with seizures	71	0.0122782	2.72827e-05
11	SMPDB Pentose Phosphate Pathway	71	0.0122782	2.72827e-05
11	SMPDB Lysine Degradation	71	0.0122782	2.72827e-05
11	SMPDB Hyperlysinemia II or Saccharopinuria	71	0.0122782	2.72827e-05
11	SMPDB Hyperlysinemia I, Familial	71	0.0122782	2.72827e-05
11	SMPDB Glucose-6-phosphate dehydrogenase deficiency	71	0.0122782	2.72827e-05
11	SMPDB 2-aminoadipic 2-oxoadipic aciduria	71	0.0122782	2.72827e-05
10	DIP TGF_beta_Receptor	60	0.0122893	2.72827e-05
21	pid IL8- and CXCR1-mediated signaling events	194	0.0123248	2.72827e-05
15	INOH Purine metabolism	118	0.0123292	2.72827e-05
14	Reactome Class I PI3K signaling events	106	0.012392	2.72827e-05
14	pid E-cadherin signaling in keratinocytes	106	0.012392	2.72827e-05
25	Reactome PLC beta mediated events	248	0.0127134	2.72827e-05
6	SMPDB Folate biosynthesis	21	0.012775	2.72827e-05
6	Reactome ATM pathway	21	0.012775	2.72827e-05
6	pid Alzheimer disease-presenilin pathway	21	0.012775	2.72827e-05
5	SMPDB Regulation of insulin secretion	13	0.0127926	2.72827e-05
5	Reactome Malate-Aspartate Shuttle	13	0.0127926	2.72827e-05
5	INOH Canonical Wnt signaling pathway ( Xenopus axis formation Wnt signaling pathway Diagram )	13	0.0127926	2.72827e-05
5	INOH Canonical Wnt signaling pathway ( Mammalian Wnt signaling pathway Diagram )	13	0.0127926	2.72827e-05
5	INOH Canonical Wnt signaling pathway ( Drosophila Wingless/Wnt signaling pathway Diagram )	13	0.0127926	2.72827e-05
5	INOH Canonical Wnt signaling pathway ( C. elegans endoderm induction Wnt signaling pathway Diagram )	13	0.0127926	2.72827e-05
5	INOH Canonical Wnt signaling pathway ( Canonical Wnt signaling pathway Diagram )	13	0.0127926	2.72827e-05
12	pid LPA4-mediated signaling events	83	0.0128079	2.72827e-05
7	SMPDB Folate metabolism ( Folate metabolism )	30	0.0128667	2.72827e-05
7	Reactome One carbon pool by folate	30	0.0128667	2.72827e-05
7	PANTHER TCA cycle	30	0.0128667	2.72827e-05
15	Reactome Endothelins	119	0.0129747	2.72827e-05
9	KEGG Folate metabolism ( Folate metabolism )	50	0.0129824	2.72827e-05
17	Reactome TCR signaling in na簿ve CD8+ T cells	144	0.0130501	2.72827e-05
23	HumanCyc superpathway of purine nucleotide salvage	222	0.0130553	2.72827e-05
11	pid Alpha9 beta1 integrin signaling events	72	0.0131661	2.72827e-05
11	INOH Citrate cycle (TCA cycle)	72	0.0131661	2.72827e-05
10	HumanCyc Citrate cycle (TCA cycle)	61	0.013278	2.72827e-05
8	pid LKB1 signaling events	40	0.0133033	2.72827e-05
8	HumanCyc Folate biosynthesis	40	0.0133033	2.72827e-05
12	SMPDB Glycogenosis, Type VII. Tarui disease	84	0.0136386	2.72827e-05
12	SMPDB Fanconi-bickel syndrome	84	0.0136386	2.72827e-05
17	HumanCyc Pyruvate metabolism	145	0.0136438	2.72827e-05
17	HumanCyc adenosine ribonucleotides de novo biosynthesis	145	0.0136438	2.72827e-05
18	HumanCyc ketogenesis	158	0.013794	2.72827e-05
14	pid GPVI-mediated activation cascade	108	0.0138041	2.72827e-05
14	HumanCyc Valine, leucine and isoleucine degradation	108	0.0138041	2.72827e-05
13	Reactome Fc-epsilon receptor I signaling in mast cells	96	0.0138231	2.72827e-05
25	Reactome DAG and IP3 signaling	251	0.0139747	2.72827e-05
11	SMPDB Very-long-chain acyl coa dehydrogenase deficiency (VLCAD)	73	0.0140947	2.72827e-05
11	SMPDB Trifunctional protein deficiency	73	0.0140947	2.72827e-05
11	SMPDB Short Chain Acyl CoA Dehydrogenase Deficiency (SCAD Deficiency)	73	0.0140947	2.72827e-05
11	SMPDB Medium chain acyl-coa dehydrogenase deficiency (MCAD)	73	0.0140947	2.72827e-05
11	SMPDB Long chain acyl-CoA dehydrogenase deficiency (LCAD)	73	0.0140947	2.72827e-05
11	SMPDB Fatty acid Metabolism	73	0.0140947	2.72827e-05
11	SMPDB Ethylmalonic Encephalopathy	73	0.0140947	2.72827e-05
11	SMPDB Carnitine palmitoyl transferase deficiency (II)	73	0.0140947	2.72827e-05
11	SMPDB Carnitine palmitoyl transferase deficiency (I)	73	0.0140947	2.72827e-05
11	Reactome Osteopontin-mediated events	73	0.0140947	2.72827e-05
11	Reactome -glutamyl cycle	73	0.0140947	2.72827e-05
11	pid Antigen activates B Cell Receptor (BCR) leading to generation of second messengers	73	0.0140947	2.72827e-05
11	HumanCyc Glutathione synthesis and recycling	73	0.0140947	2.72827e-05
22	Reactome VEGFA-VEGFR2 Pathway	211	0.0141396	2.72827e-05
9	INOH folate polyglutamylation	51	0.0141406	2.72827e-05
17	Reactome TCR signaling in na簿ve CD4+ T cells	146	0.0142547	2.72827e-05
15	IntAct EGFR1	121	0.0143311	2.72827e-05
7	SMPDB malate-aspartate shuttle	31	0.0144587	2.72827e-05
7	Reactome Integrins in angiogenesis	31	0.0144587	2.72827e-05
7	PANTHER p38 MAPK pathway	31	0.0144587	2.72827e-05
7	HumanCyc ubiquinol-10 biosynthesis	31	0.0144587	2.72827e-05
7	HumanCyc Cystinosis, ocular nonnephropathic	31	0.0144587	2.72827e-05
7	HumanCyc Cysteine Metabolism	31	0.0144587	2.72827e-05
7	HumanCyc Beta-mercaptolactate-cysteine disulfiduria	31	0.0144587	2.72827e-05
12	Reactome superpathway of conversion of glucose to acetyl CoA and entry into the TCA cycle	85	0.0145033	2.72827e-05
14	Reactome G alpha (q) signalling events	109	0.0145476	2.72827e-05
13	pid TNF receptor signaling pathway	97	0.0146255	2.72827e-05
8	SMPDB Histidine metabolism	41	0.0146637	2.72827e-05
8	SMPDB folate polyglutamylation	41	0.0146637	2.72827e-05
8	Reactome Propanoate Metabolism	41	0.0146637	2.72827e-05
8	Reactome Methylmalonic Aciduria Due to Cobalamin-Related Disorders	41	0.0146637	2.72827e-05
8	Reactome Malonyl-coa decarboxylase deficiency	41	0.0146637	2.72827e-05
8	Reactome Malonic Aciduria	41	0.0146637	2.72827e-05
8	Reactome BMAL1:CLOCK,NPAS2 activates circadian gene expression	41	0.0146637	2.72827e-05
8	Reactome Ammonia Recycling	41	0.0146637	2.72827e-05
27	Reactome Synthesis of PIPs at the plasma membrane	280	0.014674	2.72827e-05
16	KEGG Other types of O-glycan biosynthesis	134	0.0146781	2.72827e-05
16	HumanCyc Glycolysis / Gluconeogenesis	134	0.0146781	2.72827e-05
6	Reactome WNT ligand biogenesis and trafficking	22	0.0147611	2.72827e-05
6	KEGG Zoledronate Action Pathway	22	0.0147611	2.72827e-05
6	KEGG Wolman disease	22	0.0147611	2.72827e-05
6	KEGG Steroid Biosynthesis	22	0.0147611	2.72827e-05
6	KEGG Smith-Lemli-Opitz Syndrome (SLOS)	22	0.0147611	2.72827e-05
6	KEGG Simvastatin Action Pathway	22	0.0147611	2.72827e-05
6	KEGG Rosuvastatin Action Pathway	22	0.0147611	2.72827e-05
6	KEGG Risedronate Action Pathway	22	0.0147611	2.72827e-05
6	KEGG Pravastatin Action Pathway	22	0.0147611	2.72827e-05
6	KEGG Pamidronate Action Pathway	22	0.0147611	2.72827e-05
6	KEGG Mevalonic aciduria	22	0.0147611	2.72827e-05
6	KEGG malate-aspartate shuttle	22	0.0147611	2.72827e-05
6	KEGG Lysosomal Acid Lipase Deficiency (Wolman Disease)	22	0.0147611	2.72827e-05
6	KEGG Lovastatin Action Pathway	22	0.0147611	2.72827e-05
6	KEGG Ibandronate Action Pathway	22	0.0147611	2.72827e-05
6	KEGG Hyper-IgD syndrome	22	0.0147611	2.72827e-05
6	KEGG Hypercholesterolemia	22	0.0147611	2.72827e-05
6	KEGG Fluvastatin Action Pathway	22	0.0147611	2.72827e-05
6	KEGG Desmosterolosis	22	0.0147611	2.72827e-05
6	KEGG Chondrodysplasia Punctata II, X Linked Dominant (CDPX2)	22	0.0147611	2.72827e-05
6	KEGG Cholesteryl ester storage disease	22	0.0147611	2.72827e-05
6	KEGG CHILD Syndrome	22	0.0147611	2.72827e-05
6	KEGG Cerivastatin Action Pathway	22	0.0147611	2.72827e-05
6	KEGG Atorvastatin Action Pathway	22	0.0147611	2.72827e-05
6	KEGG Alendronate Action Pathway	22	0.0147611	2.72827e-05
37	Reactome FCERI mediated Ca+2 mobilization	421	0.0147772	4.09645e-05
18	Reactome Glycogen breakdown (glycogenolysis)	160	0.0149757	4.09645e-05
18	HumanCyc L-kynurenine degradation	160	0.0149757	4.09645e-05
22	HumanCyc UDP-N-acetyl-D-galactosamine biosynthesis II	213	0.015137	4.09645e-05
9	Reactome Glyoxylate metabolism and glycine degradation	52	0.015362	4.09645e-05
9	INOH Methylenetetrahydrofolate Reductase Deficiency (MTHFRD)	52	0.015362	4.09645e-05
9	INOH Amino sugar and nucleotide sugar metabolism	52	0.015362	4.09645e-05
12	pid C-MYB transcription factor network	86	0.0154023	4.09645e-05
5	Reactome Receptor-ligand binding initiates the second proteolytic cleavage of Notch receptor	14	0.015485	4.09645e-05
5	Reactome p38 MAPK pathway	14	0.015485	4.09645e-05
15	pid Signaling events mediated by focal adhesion kinase	123	0.0157755	4.09645e-05
4	Reactome Binding of TCF/LEF:CTNNB1 to target gene promoters	7	0.0158206	4.09645e-05
4	INOH (R)-Methyl-malonyl-CoA = Succinyl-CoA ( Propanoate metabolism )	7	0.0158206	4.09645e-05
4	HumanCyc Succinyl-CoA + Dihydro-lipoamide = CoA + S-Succinyl-dihydro-lipoamide ( Citrate cycle )	7	0.0158206	4.09645e-05
11	SMPDB Pyruvate dehydrogenase deficiency (E3)	75	0.0160746	4.09645e-05
11	SMPDB Pyruvate dehydrogenase deficiency (E2)	75	0.0160746	4.09645e-05
11	SMPDB Mitochondrial complex II deficiency	75	0.0160746	4.09645e-05
11	SMPDB Fumarase deficiency	75	0.0160746	4.09645e-05
11	SMPDB Congenital lactic acidosis	75	0.0160746	4.09645e-05
11	SMPDB Citric Acid Cycle	75	0.0160746	4.09645e-05
11	SMPDB 2-ketoglutarate dehydrogenase complex deficiency	75	0.0160746	4.09645e-05
11	KEGG D-Glutamine and D-glutamate metabolism	75	0.0160746	4.09645e-05
8	SMPDB Amino sugar and nucleotide sugar metabolism	42	0.0161071	4.09645e-05
8	Reactome Cholesterol biosynthesis	42	0.0161071	4.09645e-05
7	KEGG Metabolism of folate and pterines	32	0.0161654	4.09645e-05
17	HumanCyc mitochondrial L-carnitine shuttle	149	0.0161916	4.09645e-05
12	SMPDB Glycolysis	87	0.0163356	4.09645e-05
15	HumanCyc serine and glycine biosynthesis	124	0.0165308	4.09645e-05
10	SMPDB Mitochondrial Beta-Oxidation of Long Chain Saturated Fatty Acids	64	0.0165441	4.09645e-05
10	SMPDB Long-chain-3-hydroxyacyl-coa dehydrogenase deficiency (LCHAD)	64	0.0165441	4.09645e-05
10	SMPDB Fatty Acid Elongation In Mitochondria	64	0.0165441	4.09645e-05
10	HumanCyc dTMP de novo biosynthesis (mitochondrial)	64	0.0165441	4.09645e-05
9	Reactome Thioguanine Action Pathway	53	0.0166469	4.09645e-05
9	Reactome Mercaptopurine Action Pathway	53	0.0166469	4.09645e-05
9	Reactome Azathioprine Action Pathway	53	0.0166469	4.09645e-05
9	KEGG serine and glycine biosynthesis	53	0.0166469	4.09645e-05
9	INOH Valine,Leucine and Isoleucine degradation ( Valine,Leucine and Isoleucine degradation )	53	0.0166469	4.09645e-05
17	HumanCyc -D-ribose 1-phosphate degradation	150	0.0168719	4.09645e-05
6	Reactome Tetrahydrobiopterin (BH4) synthesis, recycling, salvage and regulation	23	0.0169187	4.09645e-05
6	INOH Tyrosinemia Type 3 (TYRO3)	23	0.0169187	4.09645e-05
6	INOH Tyrosinemia Type 2 (or Richner-Hanhart syndrome)	23	0.0169187	4.09645e-05
6	INOH Phenylketonuria	23	0.0169187	4.09645e-05
6	INOH Phenylalanine and Tyrosine Metabolism	23	0.0169187	4.09645e-05
11	KEGG Glycosaminoglycan degradation	76	0.0171264	4.09645e-05
13	SMPDB Propanoate Metabolism	100	0.0172077	4.09645e-05
13	SMPDB Methylmalonic Aciduria Due to Cobalamin-Related Disorders	100	0.0172077	4.09645e-05
13	SMPDB Malonyl-coa decarboxylase deficiency	100	0.0172077	4.09645e-05
13	SMPDB Malonic Aciduria	100	0.0172077	4.09645e-05
13	pid Signaling by FGFR4 in disease	100	0.0172077	4.09645e-05
13	pid Signaling by FGFR3 point mutants in cancer	100	0.0172077	4.09645e-05
13	pid Signaling by FGFR3 fusions in cancer	100	0.0172077	4.09645e-05
13	pid Signaling by FGFR2 in disease	100	0.0172077	4.09645e-05
13	pid Signaling by FGFR1 in disease	100	0.0172077	4.09645e-05
13	pid Downstream signal transduction	100	0.0172077	4.09645e-05
13	pid Constitutive Signaling by EGFRvIII	100	0.0172077	4.09645e-05
18	NetPath AndrogenReceptor	164	0.0175262	4.09645e-05
8	SMPDB Citrate cycle (TCA cycle)	43	0.0176338	4.09645e-05
8	INOH NAD+ + CoA + (S)-Methyl-malonate semialdehyde => NADH + Propanoyl-CoA + CO2 ( Valine,Leucine and Isoleucine degradation )	43	0.0176338	4.09645e-05
8	INOH NAD+ + CoA + (S)-Methyl-malonate semialdehyde => NADH + Propanoyl-CoA + CO2 ( Propanoate metabolism )	43	0.0176338	4.09645e-05
10	PANTHER IFN-gamma pathway	65	0.0177336	4.09645e-05
7	SMPDB Gemcitabine Metabolism Pathway	33	0.0179869	4.09645e-05
7	SMPDB Gemcitabine Action Pathway	33	0.0179869	4.09645e-05
7	HumanCyc Pyruvate dehydrogenase deficiency (E3)	33	0.0179869	4.09645e-05
7	HumanCyc Pyruvate dehydrogenase deficiency (E2)	33	0.0179869	4.09645e-05
7	HumanCyc Mitochondrial complex II deficiency	33	0.0179869	4.09645e-05
7	HumanCyc Fumarase deficiency	33	0.0179869	4.09645e-05
7	HumanCyc Congenital lactic acidosis	33	0.0179869	4.09645e-05
7	HumanCyc Citric Acid Cycle	33	0.0179869	4.09645e-05
7	HumanCyc 2-ketoglutarate dehydrogenase complex deficiency	33	0.0179869	4.09645e-05
9	HumanCyc Cysteine and methionine metabolism	54	0.0179955	4.09645e-05
13	pid Constitutive Signaling by Ligand-Responsive EGFR Cancer Variants	101	0.018127	4.09645e-05
13	HumanCyc malate-aspartate shuttle	101	0.018127	4.09645e-05
17	pid Insulin Pathway	152	0.0182846	4.09645e-05
5	Reactome Wnt	15	0.0184665	4.09645e-05
5	Reactome dolichyl-diphosphooligosaccharide biosynthesis	15	0.0184665	4.09645e-05
5	PhosphoSite ATM pathway	15	0.0184665	4.09645e-05
5	PANTHER Ras signaling in the CD4+ TCR pathway	15	0.0184665	4.09645e-05
5	PANTHER Purine ribonucleoside monophosphate biosynthesis	15	0.0184665	4.09645e-05
5	PANTHER Cholesterol biosynthesis	15	0.0184665	4.09645e-05
5	INOH Cholesterol biosynthesis	15	0.0184665	4.09645e-05
3	HumanCyc Sodium/Calcium exchangers	119	0.0187174	4.09645e-05
21	HumanCyc ethanol degradation IV	206	0.0187452	4.09645e-05
16	Reactome Synthesis of IP3 and IP4 in the cytosol	140	0.019039	4.09645e-05
16	Reactome FGF signaling pathway	140	0.019039	4.09645e-05
13	Reactome Nonsense Mediated Decay (NMD) enhanced by the Exon Junction Complex (EJC)	102	0.0190755	4.09645e-05
8	Reactome SUMOylation of RNA binding proteins	44	0.0192437	4.09645e-05
8	Reactome Nicotine pharmacodynamics pathway	44	0.0192437	4.09645e-05
6	SMPDB 5-Formimino-tetrahydro-folic acid + L-Glutamic acid = L-Tetrahydro-folic acid + N-Formimino-L-glutamic acid ( Histidine degradation )	24	0.0192472	4.09645e-05
6	SMPDB 5-Formimino-tetrahydro-folic acid + L-Glutamic acid = L-Tetrahydro-folic acid + N-Formimino-L-glutamic acid ( Folate metabolism )	24	0.0192472	4.09645e-05
6	Reactome PAR4-mediated thrombin signaling events	24	0.0192472	4.09645e-05
6	Reactome Activation of gene expression by SREBF (SREBP)	24	0.0192472	4.09645e-05
6	KEGG Fatty Acyl-CoA Biosynthesis	24	0.0192472	4.09645e-05
12	pid FCERI mediated MAPK activation	90	0.0193421	4.09645e-05
11	Reactome Gap-filling DNA repair synthesis and ligation in TC-NER	78	0.0193534	4.09645e-05
9	Reactome Fanconi Anemia Pathway	55	0.0194075	4.09645e-05
14	Reactome Trk receptor signaling mediated by PI3K and PLC-gamma	115	0.0195387	4.09645e-05
14	Reactome Organic anion transporters	115	0.0195387	4.09645e-05
18	Reactome RHO GTPases Activate WASPs and WAVEs	167	0.0196017	4.09645e-05
17	Reactome &gamma	154	0.019766	4.09645e-05
15	HumanCyc UDP-N-acetyl-D-glucosamine biosynthesis II	128	0.0197722	4.09645e-05
7	Reactome Trk receptor signaling mediated by the MAPK pathway	34	0.0199232	4.09645e-05
7	Reactome Transport of the SLBP independent Mature mRNA	34	0.0199232	4.09645e-05
7	Reactome Folate biosynthesis	34	0.0199232	4.09645e-05
7	INOH Folate biosynthesis	34	0.0199232	4.09645e-05
19	Reactome Signaling by cytosolic FGFR1 fusion mutants	181	0.0200473	4.09645e-05
10	pid HIF-1-alpha transcription factor network	67	0.0202638	4.09645e-05
10	NetPath IL2	67	0.0202638	4.09645e-05
36	Reactome Role of phospholipids in phagocytosis	422	0.0203425	4.09645e-05
14	SMPDB Methylenetetrahydrofolate Reductase Deficiency (MTHFRD)	116	0.0204584	4.09645e-05
14	Reactome Ethanol oxidation	116	0.0204584	4.09645e-05
14	pid DAP12 signaling	116	0.0204584	4.09645e-05
4	SMPDB Glycogen breakdown (glycogenolysis)	8	0.0204799	4.09645e-05
4	SMPDB Elevation of cytosolic Ca2+ levels	8	0.0204799	4.09645e-05
4	PANTHER activated TAK1 mediates p38 MAPK activation	8	0.0204799	4.09645e-05
11	SMPDB Valine, Leucine and Isoleucine Degradation	79	0.0205285	4.09645e-05
11	SMPDB Propionic Acidemia	79	0.0205285	4.09645e-05
11	SMPDB Methylmalonic Aciduria	79	0.0205285	4.09645e-05
11	SMPDB Methylmalonate Semialdehyde Dehydrogenase Deficiency	79	0.0205285	4.09645e-05
11	SMPDB Maple Syrup Urine Disease	79	0.0205285	4.09645e-05
11	SMPDB Isovaleric Aciduria	79	0.0205285	4.09645e-05
11	SMPDB Isovaleric acidemia	79	0.0205285	4.09645e-05
11	SMPDB Isobutyryl-coa dehydrogenase deficiency	79	0.0205285	4.09645e-05
11	SMPDB Beta-Ketothiolase Deficiency	79	0.0205285	4.09645e-05
11	SMPDB 3-Methylglutaconic Aciduria Type IV	79	0.0205285	4.09645e-05
11	SMPDB 3-Methylglutaconic Aciduria Type III	79	0.0205285	4.09645e-05
11	SMPDB 3-Methylglutaconic Aciduria Type I	79	0.0205285	4.09645e-05
11	SMPDB 3-Methylcrotonyl Coa Carboxylase Deficiency Type I	79	0.0205285	4.09645e-05
11	SMPDB 3-hydroxyisobutyric aciduria	79	0.0205285	4.09645e-05
11	SMPDB 3-hydroxyisobutyric acid dehydrogenase deficiency	79	0.0205285	4.09645e-05
11	SMPDB 3-Hydroxy-3-Methylglutaryl-CoA Lyase Deficiency	79	0.0205285	4.09645e-05
11	SMPDB 2-Methyl-3-Hydroxybutryl CoA Dehydrogenase Deficiency	79	0.0205285	4.09645e-05
11	INOH Pyrimidine metabolism	79	0.0205285	4.09645e-05
17	HumanCyc lysine degradation II (pipecolate pathway)	155	0.0205323	4.09645e-05
15	KEGG Sulfur metabolism	129	0.0206372	4.09645e-05
19	Reactome CD28 dependent PI3K/Akt signaling	182	0.020743	4.09645e-05
9	SMPDB Ion homeostasis	56	0.0208829	4.09645e-05
9	KEGG Sarcosinemia	56	0.0208829	4.09645e-05
9	KEGG Non Ketotic Hyperglycinemia	56	0.0208829	4.09645e-05
9	KEGG Hyperglycinemia, non-ketotic	56	0.0208829	4.09645e-05
9	KEGG Glycine and Serine Metabolism	56	0.0208829	4.09645e-05
9	KEGG Dimethylglycine Dehydrogenase Deficiency	56	0.0208829	4.09645e-05
9	KEGG Dihydropyrimidine Dehydrogenase Deficiency (DHPD)	56	0.0208829	4.09645e-05
9	KEGG 3-Phosphoglycerate dehydrogenase deficiency	56	0.0208829	4.09645e-05
8	KEGG Cyanoamino acid metabolism	45	0.0209365	4.09645e-05
37	Reactome Regulation of insulin secretion	439	0.0212613	4.09645e-05
12	Reactome IL8- and CXCR2-mediated signaling events	92	0.0215174	4.09645e-05
12	Reactome IL8- and CXCR1-mediated signaling events	92	0.0215174	4.09645e-05
5	Reactome Nuclear signaling by ERBB4	16	0.0217321	4.09645e-05
5	HumanCyc Synthesis of Dolichyl-phosphate	16	0.0217321	4.09645e-05
5	HumanCyc Malate-Aspartate Shuttle	16	0.0217321	4.09645e-05
11	PANTHER LPA receptor mediated events	80	0.0217443	4.09645e-05
6	SMPDB Purine ribonucleoside monophosphate biosynthesis	25	0.0217452	4.09645e-05
6	SMPDB Aminoacyl-tRNA biosynthesis	25	0.0217452	4.09645e-05
6	pid Synthesis of IP3 and IP4 in the cytosol	25	0.0217452	4.09645e-05
6	pid Fatty Acids bound to GPR40 (FFAR1) regulate insulin secretion	25	0.0217452	4.09645e-05
6	INOH Fructose and mannose metabolism	25	0.0217452	4.09645e-05
7	Reactome Transport of the SLBP Dependant Mature mRNA	35	0.0219732	4.09645e-05
7	Reactome Hypoacetylaspartia	35	0.0219732	4.09645e-05
7	Reactome Canavan Disease	35	0.0219732	4.09645e-05
7	Reactome Aspartate Metabolism	35	0.0219732	4.09645e-05
7	KEGG Ureidopropionase deficiency	35	0.0219732	4.09645e-05
7	KEGG GABA-Transaminase Deficiency	35	0.0219732	4.09645e-05
7	KEGG GABA shunt	35	0.0219732	4.09645e-05
7	KEGG Carnosinuria, carnosinemia	35	0.0219732	4.09645e-05
7	KEGG Beta-Alanine Metabolism	35	0.0219732	4.09645e-05
7	INOH Methotrexate Action Pathway	35	0.0219732	4.09645e-05
7	INOH Folate Metabolism	35	0.0219732	4.09645e-05
7	INOH Folate malabsorption, hereditary	35	0.0219732	4.09645e-05
13	KEGG Purine nucleotides and Nucleosides metabolism ( Purine nucleotides and Nucleosides metabolism )	105	0.0220946	4.09645e-05
14	Reactome Synthesis of very long-chain fatty acyl-CoAs	118	0.0223722	4.09645e-05
9	Reactome Retrograde transport at the Trans-Golgi-Network	57	0.0224211	4.09645e-05
9	Reactome GTP hydrolysis and joining of the 60S ribosomal subunit	57	0.0224211	4.09645e-05
18	Reactome VEGFR2 mediated vascular permeability	171	0.0225819	4.09645e-05
12	Reactome G2/M DNA damage checkpoint	93	0.0226558	4.09645e-05
10	Reactome Thromboxane A2 receptor signaling	69	0.0229939	4.09645e-05
11	Reactome B cell activation	81	0.0230005	4.09645e-05
11	INOH Arginine and proline metabolism	81	0.0230005	4.09645e-05
11	HumanCyc Amino acid synthesis and interconversion (transamination)	81	0.0230005	4.09645e-05
24	KEGG Sphingolipid metabolism	255	0.0232363	4.09645e-05
18	Reactome PI3K events in ERBB4 signaling	172	0.023364	4.09645e-05
18	Reactome PI3K events in ERBB2 signaling	172	0.023364	4.09645e-05
18	Reactome PI-3K cascade:FGFR4	172	0.023364	4.09645e-05
18	Reactome PI-3K cascade:FGFR3	172	0.023364	4.09645e-05
18	Reactome PI-3K cascade:FGFR2	172	0.023364	4.09645e-05
18	Reactome PI-3K cascade:FGFR1	172	0.023364	4.09645e-05
18	Reactome Constitutive Signaling by Aberrant PI3K in Cancer	172	0.023364	4.09645e-05
14	pid Signaling by SCF-KIT	119	0.0233658	4.09645e-05
9	KEGG Methylenetetrahydrofolate Reductase Deficiency (MTHFRD)	58	0.0240215	4.09645e-05
16	HumanCyc isoleucine degradation	146	0.0240904	4.09645e-05
7	Reactome Sarcosinemia	36	0.0241357	4.09645e-05
7	Reactome Pyruvate dehydrogenase deficiency (E3)	36	0.0241357	4.09645e-05
7	Reactome Pyruvate dehydrogenase deficiency (E2)	36	0.0241357	4.09645e-05
7	Reactome Non Ketotic Hyperglycinemia	36	0.0241357	4.09645e-05
7	Reactome Mitochondrial complex II deficiency	36	0.0241357	4.09645e-05
7	Reactome Hyperglycinemia, non-ketotic	36	0.0241357	4.09645e-05
7	Reactome Glycine and Serine Metabolism	36	0.0241357	4.09645e-05
7	Reactome Fumarase deficiency	36	0.0241357	4.09645e-05
7	Reactome Dimethylglycine Dehydrogenase Deficiency	36	0.0241357	4.09645e-05
7	Reactome Dihydropyrimidine Dehydrogenase Deficiency (DHPD)	36	0.0241357	4.09645e-05
7	Reactome Congenital lactic acidosis	36	0.0241357	4.09645e-05
7	Reactome Citric Acid Cycle	36	0.0241357	4.09645e-05
7	Reactome 3-Phosphoglycerate dehydrogenase deficiency	36	0.0241357	4.09645e-05
7	Reactome 2-ketoglutarate dehydrogenase complex deficiency	36	0.0241357	4.09645e-05
7	pid BCR	36	0.0241357	4.09645e-05
7	HumanCyc glycine cleavage	36	0.0241357	4.09645e-05
7	HPRD TSH	36	0.0241357	4.09645e-05
13	SMPDB Sarcosinemia	107	0.0242497	4.09645e-05
13	SMPDB Non Ketotic Hyperglycinemia	107	0.0242497	4.09645e-05
13	SMPDB Hyperglycinemia, non-ketotic	107	0.0242497	4.09645e-05
13	SMPDB Glycine and Serine Metabolism	107	0.0242497	4.09645e-05
13	SMPDB Dimethylglycine Dehydrogenase Deficiency	107	0.0242497	4.09645e-05
13	SMPDB Dihydropyrimidine Dehydrogenase Deficiency (DHPD)	107	0.0242497	4.09645e-05
13	SMPDB 3-Phosphoglycerate dehydrogenase deficiency	107	0.0242497	4.09645e-05
13	INOH superpathway of conversion of glucose to acetyl CoA and entry into the TCA cycle	107	0.0242497	4.09645e-05
15	HPRD TCR	133	0.0243107	4.09645e-05
6	Reactome Prolinemia Type II	26	0.0244099	4.09645e-05
6	Reactome Prolidase Deficiency (PD)	26	0.0244099	4.09645e-05
6	Reactome Ornithine Aminotransferase Deficiency (OAT Deficiency)	26	0.0244099	4.09645e-05
6	Reactome L-arginine:glycine amidinotransferase deficiency	26	0.0244099	4.09645e-05
6	Reactome Hyperprolinemia Type II	26	0.0244099	4.09645e-05
6	Reactome Hyperprolinemia Type I	26	0.0244099	4.09645e-05
6	Reactome Hyperornithinemia with gyrate atrophy (HOGA)	26	0.0244099	4.09645e-05
6	Reactome Hyperornithinemia-hyperammonemia-homocitrullinuria [HHH-syndrome]	26	0.0244099	4.09645e-05
6	Reactome Guanidinoacetate Methyltransferase Deficiency (GAMT Deficiency)	26	0.0244099	4.09645e-05
6	Reactome Creatine deficiency, guanidinoacetate methyltransferase deficiency	26	0.0244099	4.09645e-05
6	Reactome Arginine: Glycine Amidinotransferase Deficiency (AGAT Deficiency)	26	0.0244099	4.09645e-05
6	Reactome Arginine and Proline Metabolism	26	0.0244099	4.09645e-05
6	INOH Lysine catabolism	26	0.0244099	4.09645e-05
6	HumanCyc Transfer of Acetyl Groups into Mitochondria	26	0.0244099	4.09645e-05
6	HPRD ID	26	0.0244099	4.09645e-05
19	Reactome G beta:gamma signalling through PI3Kgamma	187	0.0244223	4.09645e-05
19	KEGG Glutathione metabolism	187	0.0244223	4.09645e-05
10	Reactome tRNA charging	70	0.0244327	4.09645e-05
10	CTD [N3-cyclopropyl-7-((4-(1-methylethyl)phenyl)methyl)-7H-pyrrolo(3, 2-f)quinazoline-1,3-diamine binds to F2R protein] promotes the reaction [CGB protein results in increased chemical synthesis of Progesterone]	70	0.0244327	4.09645e-05
10	CTD N-(2-(4-bromocinnamylamino)ethyl)-5-isoquinolinesulfonamide inhibits the reaction [[FSHB protein co-treated with Testosterone] results in increased chemical synthesis of Progesterone]	70	0.0244327	4.09645e-05
10	CTD LEP protein inhibits the reaction [8-Bromo Cyclic Adenosine Monophosphate results in increased chemical synthesis of Progesterone]	70	0.0244327	4.09645e-05
10	CTD GSTA3 protein affects the reaction [Colforsin results in increased chemical synthesis of Progesterone]	70	0.0244327	4.09645e-05
10	CTD [6,7-dimethyl-2-(2E)-3-(1-methyl-2-phenyl-1H-pyrrolo(2,3-b)pyridin-3-yl-prop-2-enoyl)-1,2,3,4-tetrahydroisoquinoline hydrochloride results in decreased activity of SMAD3 protein] inhibits the reaction [FSHB protein results in increased chemical synthesis of Progesterone]	70	0.0244327	4.09645e-05
8	SMPDB Arginine and proline metabolism	47	0.0245677	4.09645e-05
8	Reactome EPO signaling pathway	47	0.0245677	4.09645e-05
8	PANTHER Activation of NF-kappaB in B cells	47	0.0245677	4.09645e-05
8	HumanCyc inosine-5'-phosphate biosynthesis	47	0.0245677	4.09645e-05
21	Reactome Glutamate Neurotransmitter Release Cycle	215	0.024641	4.09645e-05
16	PANTHER Angiotensin_II-stimulated_signaling_through_G_proteins_and_beta-arrestin	147	0.0249971	4.09645e-05
16	HumanCyc UTP and CTP de novo biosynthesis	147	0.0249971	4.09645e-05
5	SMPDB Antigen activates B Cell Receptor (BCR) leading to generation of second messengers	17	0.0252743	4.09645e-05
5	Reactome Regulation of FZD by ubiquitination	17	0.0252743	4.09645e-05
5	pid TRP channels	17	0.0252743	4.09645e-05
5	pid Reduction of cytosolic Ca++ levels	17	0.0252743	4.09645e-05
5	pid Phase 0 - rapid depolarisation	17	0.0252743	4.09645e-05
5	pid Ion homeostasis	17	0.0252743	4.09645e-05
5	PhosphoSite Oxidative Stress Induced Senescence	17	0.0252743	4.09645e-05
5	KEGG aspartate biosynthesis	17	0.0252743	4.09645e-05
15	HumanCyc Amino sugar and nucleotide sugar metabolism	134	0.0252813	4.09645e-05
9	SMPDB valine degradation	59	0.0256833	4.09645e-05
9	SMPDB Purine nucleotides and Nucleosides metabolism ( Purine nucleotides and Nucleosides metabolism )	59	0.0256833	4.09645e-05
9	Reactome superpathway of purine nucleotide salvage	59	0.0256833	4.09645e-05
9	HumanCyc glycine/serine biosynthesis	59	0.0256833	4.09645e-05
4	PhosphoSite Ras signaling in the CD4+ TCR pathway	9	0.025708	4.09645e-05
4	PANTHER superpathway of geranylgeranyldiphosphate biosynthesis I (via mevalonate)	9	0.025708	4.09645e-05
4	KEGG Synthesis of Dolichyl-phosphate	9	0.025708	4.09645e-05
4	INOH Propionyl-CoA catabolism	9	0.025708	4.09645e-05
18	Reactome Role of LAT2/NTAL/LAB on calcium mobilization	175	0.0257963	4.09645e-05
18	Reactome PI3K/AKT activation	175	0.0257963	4.09645e-05
10	Reactome Phenylalanine and tyrosine catabolism	71	0.0259199	4.09645e-05
10	Reactome Lysine catabolism	71	0.0259199	4.09645e-05
10	INOH Propanoate metabolism	71	0.0259199	4.09645e-05
10	INOH Glycolysis / Gluconeogenesis	71	0.0259199	4.09645e-05
16	HumanCyc stearate biosynthesis	148	0.0259216	4.09645e-05
15	pid Arf6 trafficking events	135	0.0262722	4.09645e-05
7	Reactome SMAD2/SMAD3:SMAD4 heterotrimer regulates transcription	37	0.0264085	4.09645e-05
7	Reactome Signaling events regulated by Ret tyrosine kinase	37	0.0264085	4.09645e-05
7	Reactome adenosine ribonucleotides de novo biosynthesis	37	0.0264085	4.09645e-05
7	pid untitled	37	0.0264085	4.09645e-05
7	KEGG superpathway of cholesterol biosynthesis	37	0.0264085	4.09645e-05
8	Reactome Amino sugar and nucleotide sugar metabolism	48	0.0265038	4.09645e-05
8	KEGG Arginine and Proline metabolism ( Arginine and Proline metabolism )	48	0.0265038	4.09645e-05
13	PANTHER EGF receptor signaling pathway	109	0.0265156	4.09645e-05
18	Reactome GAB1 signalosome	176	0.026635	4.09645e-05
16	Reactome Fatty Acyl-CoA Biosynthesis	149	0.0268636	4.09645e-05
6	SMPDB 2-Oxo-glutaric acid + L-Cysteine-sulfinic acid = L-Glutamic acid + 3-Sulfinyl-pyruvic acid ( Methionine and Cysteine metabolism )	27	0.0272373	4.09645e-05
6	Reactome Molybdenum cofactor biosynthesis	27	0.0272373	4.09645e-05
6	Reactome Disassembly of the destruction complex and recruitment of AXIN to the membrane	27	0.0272373	4.09645e-05
6	INOH Tay-Sachs Disease	27	0.0272373	4.09645e-05
6	INOH Sialuria or French Type Sialuria	27	0.0272373	4.09645e-05
6	INOH Salla Disease/Infantile Sialic Acid Storage Disease	27	0.0272373	4.09645e-05
6	INOH Nongenotropic Androgen signaling	27	0.0272373	4.09645e-05
6	INOH G(M2)-Gangliosidosis: Variant B, Tay-sachs disease	27	0.0272373	4.09645e-05
6	INOH Amino Sugar Metabolism	27	0.0272373	4.09645e-05
6	HumanCyc Purine salvage	27	0.0272373	4.09645e-05
6	HumanCyc Methionine salvage pathway	27	0.0272373	4.09645e-05
6	HumanCyc Alanine,Aspartic acid and Asparagine metabolism ( Alanine,Aspartic acid and Asparagine metabolism )	27	0.0272373	4.09645e-05
15	Reactome Phospholipase C-mediated cascade: FGFR1	136	0.0272829	4.09645e-05
15	Reactome Phospholipase C-mediated cascade	136	0.0272829	4.09645e-05
15	Reactome FGFR4	136	0.0272829	4.09645e-05
15	Reactome FGFR3	136	0.0272829	4.09645e-05
15	Reactome FGFR2	136	0.0272829	4.09645e-05
15	HumanCyc lysine degradation I (saccharopine pathway)	136	0.0272829	4.09645e-05
9	INOH Valine, leucine and isoleucine degradation	60	0.0274052	4.09645e-05
10	Reactome Role of second messengers in netrin-1 signaling	72	0.0274546	4.09645e-05
12	HumanCyc Gluconeogenesis	97	0.027538	4.09645e-05
14	KEGG Glycosphingolipid biosynthesis - globo series	123	0.0275768	4.09645e-05
13	pid IGF1 pathway	110	0.0276889	4.09645e-05
13	pid a6b1 and a6b4 Integrin signaling	110	0.0276889	4.09645e-05
31	Reactome Ligand-gated ion channel transport	365	0.0279653	4.09645e-05
8	pid CD209 (DC-SIGN) signaling	49	0.0285181	4.09645e-05
8	pid Calcineurin-regulated NFAT-dependent transcription in lymphocytes	49	0.0285181	4.09645e-05
8	KEGG Thioguanine Action Pathway	49	0.0285181	4.09645e-05
8	KEGG Mercaptopurine Action Pathway	49	0.0285181	4.09645e-05
8	KEGG Azathioprine Action Pathway	49	0.0285181	4.09645e-05
7	SMPDB 2-Oxo-glutaric acid + L-Aspartic acid = L-Glutamic acid + Oxaloacetic acid ( Alanine,Aspartic acid and Asparagine metabolism )	38	0.0287892	4.09645e-05
7	Reactome Transport of Mature mRNA Derived from an Intronless Transcript	38	0.0287892	4.09645e-05
7	INOH Metabolism of folate and pterines	38	0.0287892	4.09645e-05
7	INOH Malate-Aspartate Shuttle	38	0.0287892	4.09645e-05
7	INOH Ammonia Recycling	38	0.0287892	4.09645e-05
12	pid Signaling events mediated by Stem cell factor receptor (c-Kit)	98	0.0288382	4.09645e-05
10	SMPDB Verapamil Action Pathway	73	0.0290358	4.09645e-05
10	SMPDB Tocainide Action Pathway	73	0.0290358	4.09645e-05
10	SMPDB Timolol Action Pathway	73	0.0290358	4.09645e-05
10	SMPDB Sotalol Action Pathway	73	0.0290358	4.09645e-05
10	SMPDB Quinidine Action Pathway	73	0.0290358	4.09645e-05
10	SMPDB Propranolol Action Pathway	73	0.0290358	4.09645e-05
10	SMPDB Procainamide (Antiarrhythmic) Action Pathway	73	0.0290358	4.09645e-05
10	SMPDB Practolol Action Pathway	73	0.0290358	4.09645e-05
10	SMPDB Pindolol Action Pathway	73	0.0290358	4.09645e-05
10	SMPDB Penbutolol Action Pathway	73	0.0290358	4.09645e-05
10	SMPDB Oxprenolol Action Pathway	73	0.0290358	4.09645e-05
10	SMPDB Nitrendipine Action Pathway	73	0.0290358	4.09645e-05
10	SMPDB Nisoldipine Action Pathway	73	0.0290358	4.09645e-05
10	SMPDB Nimodipine Action Pathway	73	0.0290358	4.09645e-05
10	SMPDB Nifedipine Action Pathway	73	0.0290358	4.09645e-05
10	SMPDB Nebivolol Action Pathway	73	0.0290358	4.09645e-05
10	SMPDB Nadolol Action Pathway	73	0.0290358	4.09645e-05
10	SMPDB Muscle/Heart Contraction	73	0.0290358	4.09645e-05
10	SMPDB Mexiletine Action Pathway	73	0.0290358	4.09645e-05
10	SMPDB Metoprolol Action Pathway	73	0.0290358	4.09645e-05
10	SMPDB Metipranolol Action Pathway	73	0.0290358	4.09645e-05
10	SMPDB Lidocaine (Antiarrhythmic) Action Pathway	73	0.0290358	4.09645e-05
10	SMPDB Levobunolol Action Pathway	73	0.0290358	4.09645e-05
10	SMPDB Labetalol Action Pathway	73	0.0290358	4.09645e-05
10	SMPDB Isradipine Action Pathway	73	0.0290358	4.09645e-05
10	SMPDB Isoprenaline Action Pathway	73	0.0290358	4.09645e-05
10	SMPDB Ibutilide Action Pathway	73	0.0290358	4.09645e-05
10	SMPDB Fosphenytoin (Antiarrhythmic) Action Pathway	73	0.0290358	4.09645e-05
10	SMPDB Flecainide Action Pathway	73	0.0290358	4.09645e-05
10	SMPDB Felodipine Action Pathway	73	0.0290358	4.09645e-05
10	SMPDB Esmolol Action Pathway	73	0.0290358	4.09645e-05
10	SMPDB Epinephrine Action Pathway	73	0.0290358	4.09645e-05
10	SMPDB Dobutamine Action Pathway	73	0.0290358	4.09645e-05
10	SMPDB Disopyramide Action Pathway	73	0.0290358	4.09645e-05
10	SMPDB Diltiazem Action Pathway	73	0.0290358	4.09645e-05
10	SMPDB Carvedilol Action Pathway	73	0.0290358	4.09645e-05
10	SMPDB Carteolol Action Pathway	73	0.0290358	4.09645e-05
10	SMPDB Bupranolol Action Pathway	73	0.0290358	4.09645e-05
10	SMPDB Bopindolol Action Pathway	73	0.0290358	4.09645e-05
10	SMPDB Bisoprolol Action Pathway	73	0.0290358	4.09645e-05
10	SMPDB Bevantolol Action Pathway	73	0.0290358	4.09645e-05
10	SMPDB Betaxolol Action Pathway	73	0.0290358	4.09645e-05
10	SMPDB Atenolol Action Pathway	73	0.0290358	4.09645e-05
10	SMPDB Arbutamine Action Pathway	73	0.0290358	4.09645e-05
10	SMPDB Amlodipine Action Pathway	73	0.0290358	4.09645e-05
10	SMPDB Amiodarone Action Pathway	73	0.0290358	4.09645e-05
10	SMPDB Alprenolol Action Pathway	73	0.0290358	4.09645e-05
10	SMPDB Acebutolol Action Pathway	73	0.0290358	4.09645e-05
5	SMPDB Sodium/Calcium exchangers	18	0.0290828	4.09645e-05
5	SMPDB Reduction of cytosolic Ca++ levels	18	0.0290828	4.09645e-05
5	Reactome TGF_beta_Receptor	18	0.0290828	4.09645e-05
5	Reactome Synthesis of Dolichyl-phosphate	18	0.0290828	4.09645e-05
5	Reactome mRNA decay by 5' to 3' exoribonuclease	18	0.0290828	4.09645e-05
5	HPRD Hedgehog	18	0.0290828	4.09645e-05
9	pid Regulation of p38-alpha and p38-beta	61	0.0291862	5.39987e-05
9	HumanCyc Propanoate Metabolism	61	0.0291862	5.39987e-05
9	HumanCyc Methylmalonic Aciduria Due to Cobalamin-Related Disorders	61	0.0291862	5.39987e-05
9	HumanCyc Malonyl-coa decarboxylase deficiency	61	0.0291862	5.39987e-05
9	HumanCyc Malonic Aciduria	61	0.0291862	5.39987e-05
19	KEGG Inositol phosphate metabolism	193	0.0292535	5.39987e-05
16	HumanCyc glutaryl-CoA degradation	152	0.0297916	5.39987e-05
14	PANTHER FGF signaling pathway	125	0.0298188	5.39987e-05
11	Reactome Synthesis of bile acids and bile salts via 24-hydroxycholesterol	86	0.0298679	5.39987e-05
11	Reactome EPHA2 forward signaling	86	0.0298679	5.39987e-05
11	pid FCERI mediated Ca+2 mobilization	86	0.0298679	5.39987e-05
11	PANTHER untitled	86	0.0298679	5.39987e-05
18	Reactome Inactivation, recovery and regulation of the phototransduction cascade	180	0.030122	5.39987e-05
18	HumanCyc superpathway of pyrimidine deoxyribonucleotides de novo biosynthesis	180	0.030122	5.39987e-05
12	PANTHER PDGFR-beta signaling pathway	99	0.0301689	5.39987e-05
12	PANTHER ErbB1 downstream signaling	99	0.0301689	5.39987e-05
12	HumanCyc asparagine biosynthesis	99	0.0301689	5.39987e-05
6	Reactome TNF receptor signaling pathway	28	0.0302226	5.39987e-05
6	pid Ras signaling in the CD4+ TCR pathway	28	0.0302226	5.39987e-05
6	NetPath Fc-epsilon receptor I signaling in mast cells	28	0.0302226	5.39987e-05
6	HumanCyc L-cysteine degradation I	28	0.0302226	5.39987e-05
6	HumanCyc Histidinemia	28	0.0302226	5.39987e-05
6	HumanCyc Histidine Metabolism	28	0.0302226	5.39987e-05
8	SMPDB Succinyl CoA: 3-ketoacid CoA transferase deficiency	50	0.0306088	5.39987e-05
8	SMPDB Ketone Body Metabolism	50	0.0306088	5.39987e-05
8	HumanCyc Tyrosine metabolism	50	0.0306088	5.39987e-05
10	INOH Pyrimidine Nucleotides and Nucleosides metabolism ( Pyrimidine Nucleotides and Nucleosides metabolism )	74	0.0306625	5.39987e-05
10	INOH purine nucleotides de novo biosynthesis	74	0.0306625	5.39987e-05
14	HumanCyc threonine degradation	126	0.0309723	5.39987e-05
9	HumanCyc Sarcosinemia	62	0.0310247	5.39987e-05
9	HumanCyc Non Ketotic Hyperglycinemia	62	0.0310247	5.39987e-05
9	HumanCyc Hyperglycinemia, non-ketotic	62	0.0310247	5.39987e-05
9	HumanCyc Glycine and Serine Metabolism	62	0.0310247	5.39987e-05
9	HumanCyc Dimethylglycine Dehydrogenase Deficiency	62	0.0310247	5.39987e-05
9	HumanCyc Dihydropyrimidine Dehydrogenase Deficiency (DHPD)	62	0.0310247	5.39987e-05
9	HumanCyc 3-Phosphoglycerate dehydrogenase deficiency	62	0.0310247	5.39987e-05
18	Reactome PIP3 activates AKT signaling	181	0.0310253	5.39987e-05
7	Reactome SUMOylation of DNA replication proteins	39	0.0312747	5.39987e-05
7	pid Signaling mediated by p38-alpha and p38-beta	39	0.0312747	5.39987e-05
7	KEGG serine biosynthesis (phosphorylated route)	39	0.0312747	5.39987e-05
11	HumanCyc Warburg Effect	87	0.0313536	5.39987e-05
13	HumanCyc Glutathione metabolism	113	0.031364	5.39987e-05
4	Reactome lysine degradation I (saccharopine pathway)	10	0.0314638	5.39987e-05
4	Reactome 2-oxoglutarate decarboxylation to succinyl-CoA	10	0.0314638	5.39987e-05
4	INOH Presenilin action in Notch and Wnt signaling	10	0.0314638	5.39987e-05
4	HumanCyc Biosynthesis of the N-glycan precursor (dolichol lipid-linked oligosaccharide, LLO) and transfer to a nascent protein	10	0.0314638	5.39987e-05
13	Reactome Vitamin B5 (pantothenate) metabolism	114	0.0326386	5.39987e-05
13	KEGG Glycosphingolipid biosynthesis - ganglio series	114	0.0326386	5.39987e-05
8	Reactome Nitrogen metabolism	51	0.0327736	5.39987e-05
8	HPRD IL2	51	0.0327736	5.39987e-05
11	pid Role of phospholipids in phagocytosis	88	0.0328746	5.39987e-05
11	pid Ceramide signaling pathway	88	0.0328746	5.39987e-05
11	PANTHER Signaling events mediated by VEGFR1 and VEGFR2	88	0.0328746	5.39987e-05
12	Reactome SRP-dependent cotranslational protein targeting to membrane	101	0.0329187	5.39987e-05
12	pid IL1-mediated signaling events	101	0.0329187	5.39987e-05
12	pid Canonical Wnt signaling pathway	101	0.0329187	5.39987e-05
12	HumanCyc asparagine degradation	101	0.0329187	5.39987e-05
9	Reactome Angiotensin_II-stimulated_signaling_through_G_proteins_and_beta-arrestin	63	0.0329191	5.39987e-05
5	SMPDB Lamivudine Metabolism Pathway	19	0.0331449	5.39987e-05
5	Reactome Regulation of CDC42 activity	19	0.0331449	5.39987e-05
5	Reactome L-kynurenine degradation	19	0.0331449	5.39987e-05
5	PhosphoSite Signaling events mediated by Stem cell factor receptor (c-Kit)	19	0.0331449	5.39987e-05
5	PANTHER Notch signaling pathway	19	0.0331449	5.39987e-05
5	KEGG Succinyl-CoA + Dihydro-lipoamide = CoA + S-Succinyl-dihydro-lipoamide ( Citrate cycle )	19	0.0331449	5.39987e-05
6	pid Alpha4 beta1 integrin signaling events	29	0.0333598	5.39987e-05
6	KEGG Pyruvate dehydrogenase deficiency (E3)	29	0.0333598	5.39987e-05
6	KEGG Pyruvate dehydrogenase deficiency (E2)	29	0.0333598	5.39987e-05
6	KEGG Mitochondrial complex II deficiency	29	0.0333598	5.39987e-05
6	KEGG Fumarase deficiency	29	0.0333598	5.39987e-05
6	KEGG Congenital lactic acidosis	29	0.0333598	5.39987e-05
6	KEGG Citric Acid Cycle	29	0.0333598	5.39987e-05
6	KEGG 2-ketoglutarate dehydrogenase complex deficiency	29	0.0333598	5.39987e-05
7	SMPDB Tyrosine metabolism	40	0.0338615	5.39987e-05
7	Reactome Mitochondrial tRNA aminoacylation	40	0.0338615	5.39987e-05
7	INOH superpathway of methionine degradation	40	0.0338615	5.39987e-05
7	INOH Hypoacetylaspartia	40	0.0338615	5.39987e-05
7	INOH Disulfiram Action Pathway	40	0.0338615	5.39987e-05
7	INOH Canavan Disease	40	0.0338615	5.39987e-05
7	INOH ATP + CoA + Citric acid = ADP + Acetyl-CoA + Oxaloacetic acid + Orthophosphate ( Lysine degradation )	40	0.0338615	5.39987e-05
7	INOH ATP + CoA + Citric acid = ADP + Acetyl-CoA + Oxaloacetic acid + Orthophosphate ( Citrate cycle )	40	0.0338615	5.39987e-05
7	INOH Aspartate Metabolism	40	0.0338615	5.39987e-05
10	Reactome Hedgehog 'on' state	76	0.0340473	5.39987e-05
10	PANTHER Endothelins	76	0.0340473	5.39987e-05
28	Reactome VEGFR2 mediated cell proliferation	331	0.0341214	5.39987e-05
12	PANTHER GPVI-mediated activation cascade	102	0.0343362	5.39987e-05
12	KEGG Glyoxylate and dicarboxylate metabolism	102	0.0343362	5.39987e-05
23	Reactome PI5P, PP2A and IER3 Regulate PI3K/AKT Signaling	257	0.0343841	5.39987e-05
14	pid Plexin-D1 Signaling	129	0.0345552	5.39987e-05
18	Reactome CD28 dependent Vav1 pathway	185	0.0347544	5.39987e-05
9	PANTHER Regulation of insulin secretion	64	0.0348677	5.39987e-05
8	Reactome Thyrotropin-releasing hormone receptor signaling pathway	52	0.0350099	5.39987e-05
13	Reactome Pyruvate metabolism	116	0.0352578	5.39987e-05
13	PANTHER Role of phospholipids in phagocytosis	116	0.0352578	5.39987e-05
10	INOH Folate metabolism ( Folate metabolism )	77	0.0358027	5.39987e-05
11	Reactome Vasopressin regulates renal water homeostasis via Aquaporins	90	0.0360179	5.39987e-05
11	HumanCyc glutathione biosynthesis	90	0.0360179	5.39987e-05
7	SMPDB purine nucleotides de novo biosynthesis	41	0.0365456	5.39987e-05
7	Reactome serine and glycine biosynthesis	41	0.0365456	5.39987e-05
7	pid FOXM1 transcription factor network	41	0.0365456	5.39987e-05
7	INOH Ureidopropionase deficiency	41	0.0365456	5.39987e-05
7	INOH GABA-Transaminase Deficiency	41	0.0365456	5.39987e-05
7	INOH Carnosinuria, carnosinemia	41	0.0365456	5.39987e-05
7	INOH Beta-Alanine Metabolism	41	0.0365456	5.39987e-05
6	Reactome Integrin signalling pathway	30	0.0366421	5.39987e-05
6	Reactome GABA shunt	30	0.0366421	5.39987e-05
6	Reactome Cyclin D associated events in G1	30	0.0366421	5.39987e-05
6	KEGG 5-Formimino-tetrahydro-folic acid + L-Glutamic acid = L-Tetrahydro-folic acid + N-Formimino-L-glutamic acid ( Histidine degradation )	30	0.0366421	5.39987e-05
6	KEGG 5-Formimino-tetrahydro-folic acid + L-Glutamic acid = L-Tetrahydro-folic acid + N-Formimino-L-glutamic acid ( Folate metabolism )	30	0.0366421	5.39987e-05
6	INOH CLEC7A (Dectin-1) signaling	30	0.0366421	5.39987e-05
9	PANTHER Effects of PIP2 hydrolysis	65	0.0368683	5.39987e-05
8	SMPDB superpathway of methionine degradation	53	0.0373151	5.39987e-05
8	Reactome Posttranslational regulation of adherens junction stability and dissassembly	53	0.0373151	5.39987e-05
8	Reactome Methylenetetrahydrofolate Reductase Deficiency (MTHFRD)	53	0.0373151	5.39987e-05
8	pid NCAM signaling for neurite out-growth	53	0.0373151	5.39987e-05
5	Reactome Regulation of retinoblastoma protein	20	0.0374457	5.39987e-05
5	Reactome Lysine degradation	20	0.0374457	5.39987e-05
5	pid VEGF signaling pathway ( VEGF signaling pathway )	20	0.0374457	5.39987e-05
5	PANTHER Oxidative Stress Induced Senescence	20	0.0374457	5.39987e-05
5	PANTHER Endogenous_cannabinoid_signaling	20	0.0374457	5.39987e-05
5	KEGG Import of palmitoyl-CoA into the mitochondrial matrix	20	0.0374457	5.39987e-05
5	KEGG asparagine biosynthesis	20	0.0374457	5.39987e-05
5	KEGG Acetyl-CoA + Dihydro-lipoamide = CoA + 6-S-Acetyl-dihydro-lipoamide ( Pyruvate metabolism )	20	0.0374457	5.39987e-05
5	KEGG Acetyl-CoA + Dihydro-lipoamide = CoA + 6-S-Acetyl-dihydro-lipoamide ( Butanoate metabolism )	20	0.0374457	5.39987e-05
10	HumanCyc Tryptophan metabolism	78	0.0375979	5.39987e-05
11	PANTHER VEGFA-VEGFR2 Pathway	91	0.0376378	5.39987e-05
11	KEGG Fatty acid biosynthesis	91	0.0376378	5.39987e-05
11	INOH Alanine, aspartate and glutamate metabolism	91	0.0376378	5.39987e-05
4	SMPDB glycogenolysis	11	0.0377003	5.39987e-05
4	Reactome Signaling by NOTCH3	11	0.0377003	5.39987e-05
4	PANTHER superpathway of cholesterol biosynthesis	11	0.0377003	5.39987e-05
4	INOH PRPP biosynthesis	11	0.0377003	5.39987e-05
4	INOH p38 MAPK pathway	11	0.0377003	5.39987e-05
4	HumanCyc pyruvate decarboxylation to acetyl CoA	11	0.0377003	5.39987e-05
4	HumanCyc Degradation of GABA	11	0.0377003	5.39987e-05
13	KEGG Glycosphingolipid biosynthesis - lacto and neolacto series	118	0.037965	5.39987e-05
9	SMPDB Transfer of Acetyl Groups into Mitochondria	66	0.038919	5.39987e-05
9	HumanCyc Succinic semialdehyde dehydrogenase deficiency	66	0.038919	5.39987e-05
9	HumanCyc Hyperinsulinism-Hyperammonemia Syndrome	66	0.038919	5.39987e-05
9	HumanCyc Homocarnosinosis	66	0.038919	5.39987e-05
9	HumanCyc Glutamate Metabolism	66	0.038919	5.39987e-05
9	HumanCyc 4-Hydroxybutyric Aciduria/Succinic Semialdehyde Dehydrogenase Deficiency	66	0.038919	5.39987e-05
9	HumanCyc 2-Hydroxyglutric Aciduria (D And L Form)	66	0.038919	5.39987e-05
28	Reactome Phase 2 - plateau phase	339	0.0391538	5.39987e-05
11	INOH Glycine, serine and threonine metabolism	92	0.0392883	5.39987e-05
11	HumanCyc heme biosynthesis	92	0.0392883	5.39987e-05
7	Reactome Beta2 adrenergic receptor signaling pathway	42	0.0393224	5.39987e-05
7	Reactome Beta1 adrenergic receptor signaling pathway	42	0.0393224	5.39987e-05
7	pid VEGFR2 mediated cell proliferation	42	0.0393224	5.39987e-05
7	pid Tie2 Signaling	42	0.0393224	5.39987e-05
7	pid SOS-mediated signalling	42	0.0393224	5.39987e-05
7	pid SHC-related events triggered by IGF1R	42	0.0393224	5.39987e-05
7	pid SHC-mediated cascade:FGFR4	42	0.0393224	5.39987e-05
7	pid SHC-mediated cascade:FGFR3	42	0.0393224	5.39987e-05
7	pid SHC-mediated cascade:FGFR2	42	0.0393224	5.39987e-05
7	pid SHC-mediated cascade:FGFR1	42	0.0393224	5.39987e-05
7	pid SHC1 events in ERBB4 signaling	42	0.0393224	5.39987e-05
7	pid SHC1 events in ERBB2 signaling	42	0.0393224	5.39987e-05
7	pid SHC1 events in EGFR signaling	42	0.0393224	5.39987e-05
7	pid RAF/MAP kinase cascade	42	0.0393224	5.39987e-05
7	pid Insulin receptor signalling cascade	42	0.0393224	5.39987e-05
7	pid GRB2 events in ERBB2 signaling	42	0.0393224	5.39987e-05
7	pid GRB2 events in EGFR signaling	42	0.0393224	5.39987e-05
7	pid FRS-mediated FGFR4 signaling	42	0.0393224	5.39987e-05
7	pid FRS-mediated FGFR3 signaling	42	0.0393224	5.39987e-05
7	pid FRS-mediated FGFR2 signaling	42	0.0393224	5.39987e-05
7	pid FRS-mediated FGFR1 signaling	42	0.0393224	5.39987e-05
7	INOH Pyruvate metabolism ( Pyruvate metabolism )	42	0.0393224	5.39987e-05
7	INOH 5-Formimino-tetrahydro-folic acid + L-Glutamic acid = L-Tetrahydro-folic acid + N-Formimino-L-glutamic acid ( Histidine degradation )	42	0.0393224	5.39987e-05
7	INOH 5-Formimino-tetrahydro-folic acid + L-Glutamic acid = L-Tetrahydro-folic acid + N-Formimino-L-glutamic acid ( Folate metabolism )	42	0.0393224	5.39987e-05
7	HumanCyc Histidine metabolism	42	0.0393224	5.39987e-05
14	pid Direct p53 effectors	133	0.0395936	5.39987e-05
8	SMPDB Ion transport by P-type ATPases	54	0.039686	5.39987e-05
8	Reactome ISG15 antiviral mechanism	54	0.039686	5.39987e-05
8	Reactome Fatty acid degradation	54	0.039686	5.39987e-05
8	INOH L-Glutamine + D-Fructose 6-phosphate = L-Glutamic acid + D-Glucosamine 6-phosphate ( Fructose and Mannose metabolism )	54	0.039686	5.39987e-05
8	INOH L-Glutamine + D-Fructose 6-phosphate = L-Glutamic acid + D-Glucosamine 6-phosphate ( Aminosugars metabolism )	54	0.039686	5.39987e-05
8	HumanCyc Sulfur amino acid metabolism	54	0.039686	5.39987e-05
6	SMPDB Threonine and 2-Oxobutanoate Degradation	31	0.0400618	5.39987e-05
6	SMPDB 2-Oxo-glutaric acid + L-Cysteine = L-Glutamic acid + 3-Mercapto-pyruvic acid ( Methionine and Cysteine metabolism )	31	0.0400618	5.39987e-05
6	SMPDB 2-Oxo-glutaric acid + L-Cysteine = L-Glutamic acid + 3-Mercapto-pyruvic acid ( Glycine and Serine metabolism )	31	0.0400618	5.39987e-05
6	Reactome serine biosynthesis (phosphorylated route)	31	0.0400618	5.39987e-05
6	Reactome S1P2 pathway	31	0.0400618	5.39987e-05
6	Reactome NEP/NS2 Interacts with the Cellular Export Machinery	31	0.0400618	5.39987e-05
6	INOH Succinyl-CoA + Dihydro-lipoamide = CoA + S-Succinyl-dihydro-lipoamide ( Citrate cycle )	31	0.0400618	5.39987e-05
6	INOH Cytosolic tRNA aminoacylation	31	0.0400618	5.39987e-05
6	HumanCyc Serine biosynthesis	31	0.0400618	5.39987e-05
6	HumanCyc Pyruvate Carboxylase Deficiency	31	0.0400618	5.39987e-05
6	HumanCyc Primary Hyperoxaluria Type I	31	0.0400618	5.39987e-05
6	HumanCyc Lactic Acidemia	31	0.0400618	5.39987e-05
6	HumanCyc aspirin triggered resolvin D biosynthesis	31	0.0400618	5.39987e-05
6	HumanCyc Alanine Metabolism	31	0.0400618	5.39987e-05
12	pid Signaling events mediated by PTP1B	106	0.0402668	5.39987e-05
12	BioGRID TCR	106	0.0402668	5.39987e-05
3	Reactome S-methyl-5-thio-&alpha	4	0.0404656	5.39987e-05
3	Reactome IFN alpha signaling pathway(JAK1 TYK2 STAT3) ( IFN alpha signaling(JAK1 TYK2 STAT1 STAT2 STAT3) )	4	0.0404656	5.39987e-05
3	Reactome IFN alpha signaling pathway((JAK1 TYK2 STAT1 STAT2) ( IFN alpha signaling(JAK1 TYK2 STAT1 STAT2 STAT3) )	4	0.0404656	5.39987e-05
3	Reactome IFN alpha signaling pathway(JAK1 TYK2 STAT1) ( IFN alpha signaling(JAK1 TYK2 STAT1 STAT2 STAT3) )	4	0.0404656	5.39987e-05
3	pid Processing of DNA double-strand break ends	4	0.0404656	5.39987e-05
3	PhosphoSite Interferon alpha/beta signaling	4	0.0404656	5.39987e-05
3	PhosphoSite IFN alpha signaling pathway(JAK1 TYK2 STAT1 STAT3) ( IFN alpha signaling(JAK1 TYK2 STAT1 STAT2 STAT3) )	4	0.0404656	5.39987e-05
3	PhosphoSite IFN alpha signaling pathway((JAK1 TYK2 STAT1 STAT2) ( IFN alpha signaling(JAK1 TYK2 STAT1 STAT2 STAT3) )	4	0.0404656	5.39987e-05
3	PhosphoSite IFN alpha signaling pathway(JAK1 TYK2 STAT1) ( IFN alpha signaling(JAK1 TYK2 STAT1 STAT2 STAT3) )	4	0.0404656	5.39987e-05
9	SMPDB Sucrase-isomaltase deficiency	67	0.0410174	5.39987e-05
9	SMPDB Starch and Sucrose Metabolism	67	0.0410174	5.39987e-05
9	SMPDB Purine metabolism	67	0.0410174	5.39987e-05
9	SMPDB Mucopolysaccharidosis VI. Sly syndrome	67	0.0410174	5.39987e-05
9	SMPDB Methotrexate Action Pathway	67	0.0410174	5.39987e-05
9	SMPDB Glycogen synthetase deficiency	67	0.0410174	5.39987e-05
9	SMPDB Glycogenosis, Type VI. Hers disease	67	0.0410174	5.39987e-05
9	SMPDB Glycogenosis, Type IV. Amylopectinosis, Anderson disease	67	0.0410174	5.39987e-05
9	SMPDB Glycogenosis, Type III. Cori disease, Debrancher glycogenosis	67	0.0410174	5.39987e-05
9	SMPDB Folate Metabolism	67	0.0410174	5.39987e-05
9	SMPDB Folate malabsorption, hereditary	67	0.0410174	5.39987e-05
9	Reactome superpathway of cholesterol biosynthesis	67	0.0410174	5.39987e-05
9	HumanCyc Thioguanine Action Pathway	67	0.0410174	5.39987e-05
9	HumanCyc Mercaptopurine Action Pathway	67	0.0410174	5.39987e-05
9	HumanCyc Azathioprine Action Pathway	67	0.0410174	5.39987e-05
9	BIND EGFR1	67	0.0410174	5.39987e-05
28	Reactome Sperm Motility And Taxes	342	0.0410767	5.39987e-05
10	SMPDB Phenytoin (Antiarrhythmic) Action Pathway	80	0.0413014	5.39987e-05
10	Reactome Astrocytic Glutamate-Glutamine Uptake And Metabolism	80	0.0413014	5.39987e-05
5	Reactome p38MAPK events	21	0.0419688	5.39987e-05
5	Reactome Intra-Golgi traffic	21	0.0419688	5.39987e-05
5	pid Unblocking of NMDA receptor, glutamate binding and activation	21	0.0419688	5.39987e-05
5	pid p38 MAPK pathway	21	0.0419688	5.39987e-05
5	KEGG Tyrosinemia Type 3 (TYRO3)	21	0.0419688	5.39987e-05
5	KEGG Tyrosinemia Type 2 (or Richner-Hanhart syndrome)	21	0.0419688	5.39987e-05
5	KEGG superpathway of geranylgeranyldiphosphate biosynthesis I (via mevalonate)	21	0.0419688	5.39987e-05
5	KEGG Serine biosynthesis	21	0.0419688	5.39987e-05
5	KEGG Phenylketonuria	21	0.0419688	5.39987e-05
5	KEGG Phenylalanine and Tyrosine Metabolism	21	0.0419688	5.39987e-05
8	SMPDB Short-chain 3-hydroxyacyl-CoA dehydrogenase deficiency (SCHAD)	55	0.0421194	5.39987e-05
8	SMPDB Mitochondrial Beta-Oxidation of Short Chain Saturated Fatty Acids	55	0.0421194	5.39987e-05
8	Reactome snRNP Assembly	55	0.0421194	5.39987e-05
8	HumanCyc Xanthinuria type II	55	0.0421194	5.39987e-05
8	HumanCyc Xanthinuria type I	55	0.0421194	5.39987e-05
8	HumanCyc Xanthine Dehydrogenase Deficiency (Xanthinuria)	55	0.0421194	5.39987e-05
8	HumanCyc Triosephosphate isomerase	55	0.0421194	5.39987e-05
8	HumanCyc Purine Nucleoside Phosphorylase Deficiency	55	0.0421194	5.39987e-05
8	HumanCyc Purine Metabolism	55	0.0421194	5.39987e-05
8	HumanCyc Phosphoenolpyruvate carboxykinase deficiency 1 (PEPCK1)	55	0.0421194	5.39987e-05
8	HumanCyc Myoadenylate deaminase deficiency	55	0.0421194	5.39987e-05
8	HumanCyc Molybdenum Cofactor Deficiency	55	0.0421194	5.39987e-05
8	HumanCyc Mitochondrial DNA depletion syndrome	55	0.0421194	5.39987e-05
8	HumanCyc Lesch-Nyhan Syndrome (LNS)	55	0.0421194	5.39987e-05
8	HumanCyc Gout or Kelley-Seegmiller Syndrome	55	0.0421194	5.39987e-05
8	HumanCyc Glycogen Storage Disease Type 1A (GSD1A) or Von Gierke Disease	55	0.0421194	5.39987e-05
8	HumanCyc Glycogenosis, Type IC	55	0.0421194	5.39987e-05
8	HumanCyc Glycogenosis, Type IB	55	0.0421194	5.39987e-05
8	HumanCyc Glycogenosis, Type IA. Von gierke disease	55	0.0421194	5.39987e-05
8	HumanCyc Fructose-1,6-diphosphatase deficiency	55	0.0421194	5.39987e-05
8	HumanCyc fatty acid biosynthesis initiation	55	0.0421194	5.39987e-05
8	HumanCyc AICA-Ribosiduria	55	0.0421194	5.39987e-05
8	HumanCyc Adenylosuccinate Lyase Deficiency	55	0.0421194	5.39987e-05
8	HumanCyc Adenosine Deaminase Deficiency	55	0.0421194	5.39987e-05
8	HumanCyc Adenine phosphoribosyltransferase deficiency (APRT)	55	0.0421194	5.39987e-05
7	Reactome Sialic acid metabolism	43	0.0421872	5.40469e-05
7	Reactome Serine biosynthesis	43	0.0421872	5.40469e-05
7	Reactome Canonical Wnt signaling pathway	43	0.0421872	5.40469e-05
7	KEGG Glycine and Serine metabolism ( Glycine and Serine metabolism )	43	0.0421872	5.40469e-05
7	INOH VEGFA-VEGFR2 Pathway	43	0.0421872	5.40469e-05
11	Reactome Purine nucleotides and Nucleosides metabolism ( Purine nucleotides and Nucleosides metabolism )	94	0.0426748	5.40469e-05
11	HumanCyc aspartate biosynthesis	94	0.0426748	5.40469e-05
9	PANTHER VEGFR2 mediated cell proliferation	68	0.043161	5.40469e-05
9	HumanCyc spermine and spermidine degradation I	68	0.043161	5.40469e-05
10	KEGG Thiamine metabolism	81	0.0432059	5.40469e-05
15	NetPath TCR	150	0.0432527	5.40469e-05
15	KEGG Glycerolipid metabolism	150	0.0432527	5.40469e-05
12	KEGG &gamma	108	0.0433732	5.40469e-05
14	HumanCyc &beta	136	0.0435415	5.40469e-05
14	HumanCyc -alanine degradation	136	0.0435415	5.40469e-05
6	SMPDB Metabolism of folate and pterines	32	0.0436104	5.7241e-05
6	SMPDB asparagine degradation	32	0.0436104	5.7241e-05
6	Reactome Translesion synthesis by REV1	32	0.0436104	5.7241e-05
6	Reactome LPA4-mediated signaling events	32	0.0436104	5.7241e-05
6	Reactome Folate metabolism ( Folate metabolism )	32	0.0436104	5.7241e-05
6	Reactome DNA Damage Recognition in GG-NER	32	0.0436104	5.7241e-05
6	Reactome Alzheimer disease-amyloid secretase pathway	32	0.0436104	5.7241e-05
6	pid Role of second messengers in netrin-1 signaling	32	0.0436104	5.7241e-05
6	pid PLC beta mediated events	32	0.0436104	5.7241e-05
6	pid DAG and IP3 signaling	32	0.0436104	5.7241e-05
6	KEGG Methotrexate Action Pathway	32	0.0436104	5.7241e-05
6	KEGG Folate Metabolism	32	0.0436104	5.7241e-05
6	KEGG Folate malabsorption, hereditary	32	0.0436104	5.7241e-05
6	INOH Citrate cycle ( Citrate cycle )	32	0.0436104	5.7241e-05
6	INOH Ca2+ pathway	32	0.0436104	5.7241e-05
6	HumanCyc Hypoacetylaspartia	32	0.0436104	5.7241e-05
6	HumanCyc Canavan Disease	32	0.0436104	5.7241e-05
6	HumanCyc Aspartate Metabolism	32	0.0436104	5.7241e-05
16	HumanCyc icosapentaenoate biosynthesis II (metazoa)	165	0.0439756	5.7241e-05
25	Reactome CLEC7A (Dectin-1) induces NFAT activation	300	0.0439784	5.7241e-05
8	Reactome Inositol phosphate metabolism	56	0.0446119	5.7241e-05
8	Reactome Alanine, aspartate and glutamate metabolism	56	0.0446119	5.7241e-05
12	Reactome Synthesis of Ketone Bodies	109	0.0449574	5.7241e-05
7	Reactome Formation of TC-NER Pre-Incision Complex	44	0.0451346	5.7241e-05
7	Reactome Circadian Clock	44	0.0451346	5.7241e-05
7	pid Validated transcriptional targets of deltaNp63 isoforms	44	0.0451346	5.7241e-05
7	KEGG Xanthinuria type II	44	0.0451346	5.7241e-05
7	KEGG Xanthinuria type I	44	0.0451346	5.7241e-05
7	KEGG Xanthine Dehydrogenase Deficiency (Xanthinuria)	44	0.0451346	5.7241e-05
7	KEGG Purine Nucleoside Phosphorylase Deficiency	44	0.0451346	5.7241e-05
7	KEGG Purine Metabolism	44	0.0451346	5.7241e-05
7	KEGG Myoadenylate deaminase deficiency	44	0.0451346	5.7241e-05
7	KEGG Molybdenum Cofactor Deficiency	44	0.0451346	5.7241e-05
7	KEGG Mitochondrial DNA depletion syndrome	44	0.0451346	5.7241e-05
7	KEGG Lesch-Nyhan Syndrome (LNS)	44	0.0451346	5.7241e-05
7	KEGG Gout or Kelley-Seegmiller Syndrome	44	0.0451346	5.7241e-05
7	KEGG AICA-Ribosiduria	44	0.0451346	5.7241e-05
7	KEGG Adenylosuccinate Lyase Deficiency	44	0.0451346	5.7241e-05
7	KEGG Adenosine Deaminase Deficiency	44	0.0451346	5.7241e-05
7	KEGG Adenine phosphoribosyltransferase deficiency (APRT)	44	0.0451346	5.7241e-05
7	INOH Drug metabolism - other enzymes	44	0.0451346	5.7241e-05
7	HumanCyc wybutosine biosynthesis	44	0.0451346	5.7241e-05
10	Reactome EPHB forward signaling	82	0.0451431	5.7241e-05
10	PANTHER FCERI mediated Ca+2 mobilization	82	0.0451431	5.7241e-05
21	Reactome FCERI mediated NF-kB activation	241	0.0457146	5.7241e-05
26	Reactome Effects of PIP2 hydrolysis	318	0.0457778	5.7241e-05
11	PANTHER Signaling events mediated by Hepatocyte Growth Factor Receptor (c-Met)	96	0.0461655	5.7241e-05
14	Reactome HATs acetylate histones	138	0.0462411	5.7241e-05
16	HumanCyc superpathway of pyrimidine ribonucleotides de novo biosynthesis	167	0.0463233	5.7241e-05
13	Reactome Coenzyme A biosynthesis	124	0.0465399	5.7241e-05
5	Reactome N-Glycan biosynthesis	22	0.0466961	5.7241e-05
5	Reactome Cystinosis, ocular nonnephropathic	22	0.0466961	5.7241e-05
5	Reactome Cysteine Metabolism	22	0.0466961	5.7241e-05
5	Reactome Beta-mercaptolactate-cysteine disulfiduria	22	0.0466961	5.7241e-05
5	Reactome BBSome-mediated cargo-targeting to cilium	22	0.0466961	5.7241e-05
5	KEGG Pyruvate metabolism ( Pyruvate metabolism )	22	0.0466961	5.7241e-05
5	KEGG L-kynurenine degradation	22	0.0466961	5.7241e-05
10	SMPDB Disulfiram Action Pathway	83	0.0471108	5.7241e-05
8	SMPDB Cysteine and methionine metabolism	57	0.0471596	5.7241e-05
6	Reactome Translesion synthesis by POLK	33	0.0472789	5.7241e-05
6	Reactome Translesion synthesis by POLI	33	0.0472789	5.7241e-05
6	INOH Purine ribonucleoside monophosphate biosynthesis	33	0.0472789	5.7241e-05
6	INOH NAD+ + L-Saccharopine + H2O = NADH + L-2-Amino-adipate 6-semialdehyde + L-Glutamic acid ( Lysine degradation )	33	0.0472789	5.7241e-05
6	INOH IMP + Pyrophosphate = Hypoxanthine + D-5-Phospho-ribosyl 1-diphosphate ( Purine nucleotides and Nucleosides metabolism )	33	0.0472789	5.7241e-05
6	HumanCyc cysteine biosynthesis/homocysteine degradation (trans-sulfuration)	33	0.0472789	5.7241e-05
9	Reactome Heterotrimeric G-protein signaling pathway-Gq alpha and Go alpha mediated pathway	70	0.0475734	5.7241e-05
9	HumanCyc tetrapyrrole biosynthesis	70	0.0475734	5.7241e-05
9	HumanCyc glycogenolysis	70	0.0475734	5.7241e-05
7	Reactome Translocation of GLUT4 to the plasma membrane	45	0.0481591	5.7241e-05
7	pid PLK1 signaling events	45	0.0481591	5.7241e-05
7	pid FOXA1 transcription factor network	45	0.0481591	5.7241e-05
7	INOH Glutathione metabolism	45	0.0481591	5.7241e-05
7	INOH aspartate biosynthesis	45	0.0481591	5.7241e-05
7	INOH asparagine degradation	45	0.0481591	5.7241e-05
12	PANTHER Nicotinic acetylcholine receptor signaling pathway	111	0.0481812	5.7241e-05
32	Reactome Antigen activates B Cell Receptor (BCR) leading to generation of second messengers	417	0.0482286	5.7241e-05
14	HumanCyc -linolenate biosynthesis	140	0.0489861	5.7241e-05
8	SMPDB Pyruvate metabolism	58	0.0497587	5.7241e-05
8	pid Stabilization and expansion of the E-cadherin adherens junction	58	0.0497587	5.7241e-05
8	pid Signaling events mediated by HDAC Class I	58	0.0497587	5.7241e-05
9	Reactome superpathway of methionine degradation	71	0.0498367	5.7241e-05
9	Reactome Noncanonical Wnt signaling pathway	71	0.0498367	5.7241e-05
13	HumanCyc 2-oxobutanoate degradation	127	0.0510303	5.7241e-05
6	KEGG ATP + L-Glutamic acid + NH3 = ADP + L-Glutamine + Orthophosphate ( Glutamic acid and Glutamine metabolism )	34	0.0510575	5.7241e-05
6	KEGG ATP + L-Glutamic acid + NH3 = ADP + L-Glutamine + Orthophosphate ( Arginine and Proline metabolism )	34	0.0510575	5.7241e-05
6	INOH Inositol phosphate metabolism	34	0.0510575	5.7241e-05
10	pid VEGFA-VEGFR2 Pathway	85	0.0511294	5.7241e-05
10	INOH Arginine and Proline metabolism ( Arginine and Proline metabolism )	85	0.0511294	5.7241e-05
7	Reactome Stabilization of p53	46	0.0512547	5.7241e-05
7	pid Signalling to RAS	46	0.0512547	5.7241e-05
7	KEGG Amino acid synthesis and interconversion (transamination)	46	0.0512547	5.7241e-05
7	INOH tRNA charging	46	0.0512547	5.7241e-05
7	INOH asparagine biosynthesis	46	0.0512547	5.7241e-05
7	HumanCyc Folate metabolism ( Folate metabolism )	46	0.0512547	5.7241e-05
4	Reactome WNT5A-dependent internalization of FZD2, FZD5 and ROR2	13	0.0514075	5.7241e-05
4	Reactome Propionyl-CoA catabolism	13	0.0514075	5.7241e-05
4	Reactome lysine degradation II (pipecolate pathway)	13	0.0514075	5.7241e-05
4	PhosphoSite VEGF signaling pathway ( VEGF signaling pathway )	13	0.0514075	5.7241e-05
4	KEGG Cytosolic tRNA aminoacylation	13	0.0514075	5.7241e-05
4	KEGG 2-oxoglutarate + [dihydrolipoyllysine-residue succinyltransferase] lipoyllysine = [dihydrolipoyllysine-residue succinyltransferase] S-succinyldihydrolipoyllysine + CO2 ( Citrate cycle )	13	0.0514075	5.7241e-05
4	INOH Cobalamin (Cbl, vitamin B12) transport and metabolism	13	0.0514075	5.7241e-05
4	HumanCyc trans, trans-farnesyl diphosphate biosynthesis	13	0.0514075	5.7241e-05
12	HumanCyc Purine nucleotides and Nucleosides metabolism ( Purine nucleotides and Nucleosides metabolism )	113	0.0514698	5.7241e-05
11	pid Downstream TCR signaling	99	0.051568	5.7241e-05
5	TRANSFAC Validated targets of C-MYC transcriptional activation	23	0.0516082	5.7241e-05
5	SMPDB Phenylacetate Metabolism	23	0.0516082	5.7241e-05
5	SMPDB GABA shunt	23	0.0516082	5.7241e-05
5	Reactome RNA Polymerase III Transcription Termination	23	0.0516082	5.7241e-05
5	Reactome RNA Polymerase III Abortive And Retractive Initiation	23	0.0516082	5.7241e-05
5	Reactome Interconversion of 2-oxoglutarate and 2-hydroxyglutarate	23	0.0516082	5.7241e-05
5	Reactome ErbB4 signaling events	23	0.0516082	5.7241e-05
5	Reactome De novo purine biosynthesis	23	0.0516082	5.7241e-05
5	Reactome Activated NOTCH1 Transmits Signal to the Nucleus	23	0.0516082	5.7241e-05
5	pid Signaling events mediated by the Hedgehog family	23	0.0516082	5.7241e-05
5	pid Oxidative Stress Induced Senescence	23	0.0516082	5.7241e-05
5	KEGG Malate-Aspartate Shuttle	23	0.0516082	5.7241e-05
5	KEGG asparagine degradation	23	0.0516082	5.7241e-05
5	INOH Succinyl-CoA + Acetoacetic acid = Succinic acid + Acetoacetyl-CoA ( Valine,Leucine and Isoleucine degradation )	23	0.0516082	5.7241e-05
5	INOH Succinyl-CoA + Acetoacetic acid = Succinic acid + Acetoacetyl-CoA ( Butanoate metabolism )	23	0.0516082	5.7241e-05
5	INOH FCERI mediated Ca+2 mobilization	23	0.0516082	5.7241e-05
5	INOH 5-aminoimidazole ribonucleotide biosynthesis	23	0.0516082	5.7241e-05
5	BioGRID TSH	23	0.0516082	5.7241e-05
9	Reactome RMTs methylate histone arginines	72	0.0521341	5.7241e-05
9	PANTHER TGF-beta signaling pathway	72	0.0521341	5.7241e-05
15	HumanCyc leucine degradation	157	0.0521637	5.7241e-05
8	Reactome SCF(Skp2)-mediated degradation of p27/p21	59	0.0524051	5.7241e-05
8	pid Coregulation of Androgen receptor activity	59	0.0524051	5.7241e-05
8	KEGG superpathway of conversion of glucose to acetyl CoA and entry into the TCA cycle	59	0.0524051	5.7241e-05
19	Reactome WNT mediated activation of DVL	218	0.0528061	5.7241e-05
14	HumanCyc 2'-deoxy-&alpha	143	0.0531716	5.7241e-05
10	Reactome Urea cycle	86	0.0531756	5.7241e-05
10	PANTHER Huntington disease	86	0.0531756	5.7241e-05
10	PANTHER Antigen activates B Cell Receptor (BCR) leading to generation of second messengers	86	0.0531756	5.7241e-05
10	HumanCyc S-adenosyl-L-methionine biosynthesis	86	0.0531756	5.7241e-05
10	HumanCyc Alanine, aspartate and glutamate metabolism	86	0.0531756	5.7241e-05
3	Reactome Rev-mediated nuclear export of HIV RNA	5	0.053334	5.7241e-05
3	Reactome Regulation of nuclear beta catenin signaling and target gene transcription	5	0.053334	5.7241e-05
3	Reactome Methylmalonyl pathway	5	0.053334	5.7241e-05
3	Reactome IFN alpha signaling pathway(JAK1 TYK2 STAT1 STAT3) ( IFN alpha signaling(JAK1 TYK2 STAT1 STAT2 STAT3) )	5	0.053334	5.7241e-05
3	Reactome Disinhibition of SNARE formation	5	0.053334	5.7241e-05
3	pid Binding of TCF/LEF:CTNNB1 to target gene promoters	5	0.053334	5.7241e-05
3	PANTHER Receptor-ligand binding initiates the second proteolytic cleavage of Notch receptor	5	0.053334	5.7241e-05
3	PANTHER Propionyl-CoA catabolism	5	0.053334	5.7241e-05
3	PANTHER Constitutive Signaling by NOTCH1 PEST Domain Mutants	5	0.053334	5.7241e-05
3	PANTHER Constitutive Signaling by NOTCH1 HD+PEST Domain Mutants	5	0.053334	5.7241e-05
3	PANTHER Constitutive Signaling by NOTCH1 HD Domain Mutants	5	0.053334	5.7241e-05
3	PANTHER Activated NOTCH1 Transmits Signal to the Nucleus	5	0.053334	5.7241e-05
3	NetPath Cyclin D associated events in G1	5	0.053334	5.7241e-05
3	KEGG trans, trans-farnesyl diphosphate biosynthesis	5	0.053334	5.7241e-05
3	INOH Regulation of IFNA signaling	5	0.053334	5.7241e-05
3	INOH Methylmalonyl pathway	5	0.053334	5.7241e-05
3	INOH IFN alpha signaling pathway(JAK1 TYK2 STAT3) ( IFN alpha signaling(JAK1 TYK2 STAT1 STAT2 STAT3) )	5	0.053334	5.7241e-05
3	INOH IFN alpha signaling pathway(JAK1 TYK2 STAT1) ( IFN alpha signaling(JAK1 TYK2 STAT1 STAT2 STAT3) )	5	0.053334	5.7241e-05
3	CTD TGF_beta_Receptor	5	0.053334	5.7241e-05
17	Reactome Amino acid transport across the plasma membrane	188	0.0533973	5.7241e-05
11	KEGG Tyrosine metabolism	100	0.0534062	5.7241e-05
7	SMPDB Nucleotide Sugars Metabolism	47	0.0544153	5.7241e-05
7	SMPDB Glutathione metabolism	47	0.0544153	5.7241e-05
7	SMPDB Galactosemia III	47	0.0544153	5.7241e-05
7	SMPDB Galactosemia II (GALK)	47	0.0544153	5.7241e-05
7	Reactome untitled	47	0.0544153	5.7241e-05
7	INOH superpathway of pyrimidine deoxyribonucleotides de novo biosynthesis	47	0.0544153	5.7241e-05
7	INOH Histidine metabolism	47	0.0544153	5.7241e-05
7	INOH 2-Oxo-glutaric acid + 4-Amino-butanoic acid = L-Glutamic acid + Succinate semialdehyde ( Glutamic acid and Glutamine metabolism )	47	0.0544153	5.7241e-05
7	INOH 2-Oxo-glutaric acid + 4-Amino-butanoic acid = L-Glutamic acid + Succinate semialdehyde ( Arginine and Proline metabolism )	47	0.0544153	5.7241e-05
9	Reactome Nonhomologous End-Joining (NHEJ)	73	0.0544627	5.7241e-05
9	INOH Succinic semialdehyde dehydrogenase deficiency	73	0.0544627	5.7241e-05
9	INOH Hyperinsulinism-Hyperammonemia Syndrome	73	0.0544627	5.7241e-05
9	INOH Homocarnosinosis	73	0.0544627	5.7241e-05
9	INOH Glutamate Metabolism	73	0.0544627	5.7241e-05
9	INOH 4-Hydroxybutyric Aciduria/Succinic Semialdehyde Dehydrogenase Deficiency	73	0.0544627	5.7241e-05
9	INOH 2-Hydroxyglutric Aciduria (D And L Form)	73	0.0544627	5.7241e-05
14	PANTHER Muscarinic acetylcholine receptor 1 and 3 signaling pathway	144	0.0545807	5.7241e-05
6	SMPDB Tryptophan metabolism	35	0.0549361	5.7241e-05
6	pid ATR signaling pathway	35	0.0549361	5.7241e-05
6	PANTHER PAR1-mediated thrombin signaling events	35	0.0549361	5.7241e-05
6	KEGG glutamine biosynthesis	35	0.0549361	5.7241e-05
6	INOH Acetyl-CoA + Dihydro-lipoamide = CoA + 6-S-Acetyl-dihydro-lipoamide ( Pyruvate metabolism )	35	0.0549361	5.7241e-05
6	INOH Acetyl-CoA + Dihydro-lipoamide = CoA + 6-S-Acetyl-dihydro-lipoamide ( Butanoate metabolism )	35	0.0549361	5.7241e-05
8	INOH Nicotinate and Nicotinamide metabolism ( Nicotinate and Nicotinamide metabolism )	60	0.0550946	5.7241e-05
8	INOH L-Glutamine + H2O = L-Glutamic acid + NH3 ( Glutamic acid and Glutamine metabolism )	60	0.0550946	5.7241e-05
8	INOH ATP + L-Glutamic acid + NH3 = ADP + L-Glutamine + Orthophosphate ( Glutamic acid and Glutamine metabolism )	60	0.0550946	5.7241e-05
8	INOH ATP + L-Glutamic acid + NH3 = ADP + L-Glutamine + Orthophosphate ( Arginine and Proline metabolism )	60	0.0550946	5.7241e-05
10	pid CD40/CD40L signaling	87	0.0552435	5.7241e-05
10	HumanCyc Glycerophospholipid metabolism	87	0.0552435	5.7241e-05
5	SMPDB Ubiquinone and other terpenoid-quinone biosynthesis	24	0.0566849	5.7241e-05
5	Reactome Tramadol Action Action Pathway	24	0.0566849	5.7241e-05
5	Reactome Sufentanil Action Pathway	24	0.0566849	5.7241e-05
5	Reactome Sphingolipid metabolism	24	0.0566849	5.7241e-05
5	Reactome Ropivacaine Action Pathway	24	0.0566849	5.7241e-05
5	Reactome Remifentanil Action Pathway	24	0.0566849	5.7241e-05
5	Reactome Propoxyphene Action Pathway	24	0.0566849	5.7241e-05
5	Reactome Proparacaine Action Pathway	24	0.0566849	5.7241e-05
5	Reactome Procaine Action Pathway	24	0.0566849	5.7241e-05
5	Reactome Prilocaine Action Pathway	24	0.0566849	5.7241e-05
5	Reactome Pentazocine Action Pathway	24	0.0566849	5.7241e-05
5	Reactome Oxymorphone Action Pathway	24	0.0566849	5.7241e-05
5	Reactome Oxycodone Action Pathway	24	0.0566849	5.7241e-05
5	Reactome Oxybuprocaine Action Pathway	24	0.0566849	5.7241e-05
5	Reactome Naltrexone Action Pathway	24	0.0566849	5.7241e-05
5	Reactome Naloxone Action Pathway	24	0.0566849	5.7241e-05
5	Reactome Nalbuphine Action Pathway	24	0.0566849	5.7241e-05
5	Reactome Morphine Action Pathway	24	0.0566849	5.7241e-05
5	Reactome Methadyl Acetate Action Pathway	24	0.0566849	5.7241e-05
5	Reactome Methadone Action Pathway	24	0.0566849	5.7241e-05
5	Reactome Mepivacaine Action Pathway	24	0.0566849	5.7241e-05
5	Reactome Lidocaine (Local Anaesthetic) Action Pathway	24	0.0566849	5.7241e-05
5	Reactome Levorphanol Action Pathway	24	0.0566849	5.7241e-05
5	Reactome Levomethadyl Acetate Action Action Pathway	24	0.0566849	5.7241e-05
5	Reactome Levobupivacaine Action Pathway	24	0.0566849	5.7241e-05
5	Reactome Levallorphan Action Pathway	24	0.0566849	5.7241e-05
5	Reactome Ketobemidone Action Pathway	24	0.0566849	5.7241e-05
5	Reactome Imipramine Action Pathway	24	0.0566849	5.7241e-05
5	Reactome Hydromorphone Action Pathway	24	0.0566849	5.7241e-05
5	Reactome Hydrocodone Action Pathway	24	0.0566849	5.7241e-05
5	Reactome Heroin Action Pathway	24	0.0566849	5.7241e-05
5	Reactome Fluoxetine Action Pathway	24	0.0566849	5.7241e-05
5	Reactome Fentanyl Action Pathway	24	0.0566849	5.7241e-05
5	Reactome Ethylmorphine Action Pathway	24	0.0566849	5.7241e-05
5	Reactome Escitalopram Action Pathway	24	0.0566849	5.7241e-05
5	Reactome Diphenoxylate Action Pathway	24	0.0566849	5.7241e-05
5	Reactome Dimethylthiambutene Action Pathway	24	0.0566849	5.7241e-05
5	Reactome Dihydromorphine Action Pathway	24	0.0566849	5.7241e-05
5	Reactome Dibucaine Action Pathway	24	0.0566849	5.7241e-05
5	Reactome Dezocine Action Pathway	24	0.0566849	5.7241e-05
5	Reactome Desipramine Action Pathway	24	0.0566849	5.7241e-05
5	Reactome Codeine Action Pathway	24	0.0566849	5.7241e-05
5	Reactome Cocaine Action Pathway	24	0.0566849	5.7241e-05
5	Reactome Chloroprocaine Action Pathway	24	0.0566849	5.7241e-05
5	Reactome Carfentanil Action Pathway	24	0.0566849	5.7241e-05
5	Reactome Buprenorphine Action Pathway	24	0.0566849	5.7241e-05
5	Reactome Bupivacaine Action Pathway	24	0.0566849	5.7241e-05
5	Reactome Benzocaine Action Pathway	24	0.0566849	5.7241e-05
5	Reactome Anileridine Action Pathway	24	0.0566849	5.7241e-05
5	Reactome Alvimopan Action Pathway	24	0.0566849	5.7241e-05
5	Reactome Alfentanil Action Pathway	24	0.0566849	5.7241e-05
5	Reactome 3-Methylthiofentanyl Action Pathway	24	0.0566849	5.7241e-05
5	PhosphoSite Trk receptor signaling mediated by the MAPK pathway	24	0.0566849	5.7241e-05
5	PANTHER VEGF signaling pathway ( VEGF signaling pathway )	24	0.0566849	5.7241e-05
5	INOH Pentose phosphate pathway (hexose monophosphate shunt)	24	0.0566849	5.7241e-05
5	HumanCyc Transferrin endocytosis and recycling	24	0.0566849	5.7241e-05
5	HumanCyc heme degradation	24	0.0566849	5.7241e-05
9	NetPath KitReceptor	74	0.0568191	5.7241e-05
10	Reactome FAS (CD95) signaling pathway	88	0.0573304	5.7241e-05
10	PANTHER De novo purine biosynthesis	88	0.0573304	5.7241e-05
10	INOH Glycine and Serine metabolism ( Glycine and Serine metabolism )	88	0.0573304	5.7241e-05
7	Reactome NRAGE signals death through JNK	48	0.0576344	5.7241e-05
7	PANTHER Ion homeostasis	48	0.0576344	5.7241e-05
7	PANTHER Elevation of cytosolic Ca2+ levels	48	0.0576344	5.7241e-05
7	NetPath TSH	48	0.0576344	5.7241e-05
7	KEGG tRNA charging	48	0.0576344	5.7241e-05
7	HumanCyc Zoledronate Action Pathway	48	0.0576344	5.7241e-05
7	HumanCyc Wolman disease	48	0.0576344	5.7241e-05
7	HumanCyc Steroid Biosynthesis	48	0.0576344	5.7241e-05
7	HumanCyc Smith-Lemli-Opitz Syndrome (SLOS)	48	0.0576344	5.7241e-05
7	HumanCyc Simvastatin Action Pathway	48	0.0576344	5.7241e-05
7	HumanCyc Rosuvastatin Action Pathway	48	0.0576344	5.7241e-05
7	HumanCyc Risedronate Action Pathway	48	0.0576344	5.7241e-05
7	HumanCyc Pravastatin Action Pathway	48	0.0576344	5.7241e-05
7	HumanCyc Pamidronate Action Pathway	48	0.0576344	5.7241e-05
7	HumanCyc Mevalonic aciduria	48	0.0576344	5.7241e-05
7	HumanCyc Lysosomal Acid Lipase Deficiency (Wolman Disease)	48	0.0576344	5.7241e-05
7	HumanCyc Lovastatin Action Pathway	48	0.0576344	5.7241e-05
7	HumanCyc Ibandronate Action Pathway	48	0.0576344	5.7241e-05
7	HumanCyc Hyper-IgD syndrome	48	0.0576344	5.7241e-05
7	HumanCyc Hypercholesterolemia	48	0.0576344	5.7241e-05
7	HumanCyc Fluvastatin Action Pathway	48	0.0576344	5.7241e-05
7	HumanCyc Desmosterolosis	48	0.0576344	5.7241e-05
7	HumanCyc Chondrodysplasia Punctata II, X Linked Dominant (CDPX2)	48	0.0576344	5.7241e-05
7	HumanCyc Cholesteryl ester storage disease	48	0.0576344	5.7241e-05
7	HumanCyc CHILD Syndrome	48	0.0576344	5.7241e-05
7	HumanCyc Cerivastatin Action Pathway	48	0.0576344	5.7241e-05
7	HumanCyc Atorvastatin Action Pathway	48	0.0576344	5.7241e-05
7	HumanCyc Alendronate Action Pathway	48	0.0576344	5.7241e-05
8	pid EGFR-dependent Endothelin signaling events	61	0.0578228	0.000104502
8	INOH Urea Cycle	61	0.0578228	0.000104502
8	INOH Ornithine Transcarbamylase Deficiency (OTC Deficiency)	61	0.0578228	0.000104502
8	INOH Glutamic acid and Glutamine metabolism ( Glutamic acid and Glutamine metabolism )	61	0.0578228	0.000104502
8	INOH Citrullinemia Type I	61	0.0578228	0.000104502
8	INOH Carbamoyl Phosphate Synthetase Deficiency	61	0.0578228	0.000104502
8	INOH Argininosuccinic Aciduria	61	0.0578228	0.000104502
8	INOH Argininemia	61	0.0578228	0.000104502
15	Reactome HCN channels	162	0.0587004	0.000104502
4	SMPDB inosine-5'-phosphate biosynthesis	14	0.0587684	0.000104502
4	PhosphoSite Recruitment and ATM-mediated phosphorylation of repair and signaling proteins at DNA double strand breaks	14	0.0587684	0.000104502
4	PhosphoSite Downstream signaling in na簿ve CD8+ T cells	14	0.0587684	0.000104502
6	Reactome Ionotropic glutamate receptor pathway	36	0.0589039	0.000563841
6	KEGG Urea Cycle	36	0.0589039	0.000563841
6	KEGG Ornithine Transcarbamylase Deficiency (OTC Deficiency)	36	0.0589039	0.000563841
6	KEGG Citrullinemia Type I	36	0.0589039	0.000563841
6	KEGG Carbamoyl Phosphate Synthetase Deficiency	36	0.0589039	0.000563841
6	KEGG Argininosuccinic Aciduria	36	0.0589039	0.000563841
6	KEGG Argininemia	36	0.0589039	0.000563841
10	Reactome Generation of second messenger molecules	89	0.0594341	1
18	Reactome Elevation of cytosolic Ca2+ levels	209	0.0595106	1

## Sheet: B_promotor only methy_pathway
Methylation genes in promoter	Pathway name	Total genes in pathway	P-value	FDR_adjust
18	NetPath TGF_beta_Receptor	203	8.0569e-06	0.000255123
14	NetPath BCR	131	1.8065e-05	0.000522902
13	PANTHER Wnt signaling pathway	127	5.66112e-05	0.000522902
9	pid Hedgehog signaling events mediated by Gli proteins	58	9.49608e-05	0.000522902
8	Reactome Wnt signaling pathway	44	0.000118034	0.000522902
9	HPRD Wnt	63	0.000157243	0.000522902
9	BIND TGF_beta_Receptor	65	0.000189956	0.000522902
14	Reactome Resolution of Sister Chromatid Cohesion	170	0.000192615	0.000522902
14	INOH VEGF signaling pathway ( VEGF signaling pathway )	171	0.000202679	0.000600074
14	INOH AKT(PKB)-Bad signaling ( IL-7 signaling(JAK1 JAK3 STAT5) )	171	0.000202679	0.000600074
14	INOH AKT(PKB)-Bad signaling ( EPO signaling pathway(JAK2 STAT1 STAT3 STAT5) )	171	0.000202679	0.000600074
11	NetPath Wnt	106	0.000226219	0.00115504
14	INOH Positive regulation of (Transcription of SOCS by STAT dimer) in JAK STAT pathway ( JAK-STAT pathway and regulation pathway Diagram )	177	0.000272792	0.00115504
13	BioGRID TGF_beta_Receptor	157	0.000330114	0.00115504
11	pid Ephrin B reverse signaling	119	0.000509685	0.00115504
9	BioGRID BCR	77	0.000519566	0.00115504
10	HPRD BCR	98	0.000536451	0.00115504
9	IntAct TGF_beta_Receptor	78	0.000560145	0.00115504
13	pid TRAIL signaling pathway	168	0.000563988	0.00115504
14	HPRD TNFalpha	194	0.000588703	0.00136841
13	KEGG Fructose and mannose metabolism	173	0.00070789	0.00136841
16	NetPath TNFalpha	252	0.000720003	0.00136841
18	pid CDC42 signaling events	311	0.00079852	0.00136841
15	Reactome Separation of Sister Chromatids	228	0.000803425	0.0019762
12	PANTHER Angiogenesis	157	0.00105823	0.0019762
12	HPRD TGF_beta_Receptor	157	0.00105823	0.0019762
6	pid Activation of NF-kappaB in B cells	35	0.00166025	0.0019762
6	BIND BCR	35	0.00166025	0.0019762
13	pid Nephrin/Neph1 signaling in the kidney podocyte	194	0.00166953	0.0019762
7	BioGRID Wnt	53	0.00168805	0.0019762
6	pid BCR	36	0.00184876	0.0019762
22	Reactome Metabolic pathways	465	0.00186698	0.0019762
16	HumanCyc superpathway of methionine degradation	282	0.00189538	0.0019762
7	IntAct BCR	55	0.00198874	0.0019762
17	INOH Metabolic pathways	314	0.00203365	0.0019762
14	pid Neurotrophic factor-mediated Trk receptor signaling	228	0.00209956	0.0019762
9	Reactome Cytosolic tRNA aminoacylation	100	0.00226798	0.0019762
5	BioGRID IL5	22	0.0022687	0.0019762
6	SMPDB Tyrosinemia Type 3 (TYRO3)	38	0.0022702	0.0019762
6	SMPDB Tyrosinemia Type 2 (or Richner-Hanhart syndrome)	38	0.0022702	0.0019762
6	SMPDB Phenylketonuria	38	0.0022702	0.0019762
6	SMPDB Phenylalanine and Tyrosine Metabolism	38	0.0022702	0.0019762
17	pid Signaling events mediated by VEGFR1 and VEGFR2	322	0.00251716	0.0019762
14	pid EPHB forward signaling	234	0.0025478	0.0019762
7	pid Regulation of nuclear beta catenin signaling and target gene transcription	59	0.00270393	0.0019762
6	Reactome Alzheimer disease-presenilin pathway	40	0.00275458	0.0019762
15	pid IFN-gamma pathway	266	0.00278982	0.0019762
15	pid LPA receptor mediated events	267	0.00287112	0.0019762
15	pid Osteopontin-mediated events	268	0.00295423	0.0019762
33	KEGG Metabolic pathways	863	0.00295781	0.0019762
10	DIP TNFalpha	130	0.00299062	0.0019762
18	pid ErbB1 downstream signaling	360	0.00301381	0.0019762
7	pid Validated targets of C-MYC transcriptional repression	61	0.00312318	0.0019762
14	HumanCyc valine degradation	242	0.00325668	0.0019762
6	IntAct Wnt	42	0.00330618	0.0019762
5	Reactome Collagen degradation	25	0.00336873	0.0019762
5	HPRD IL5	25	0.00336873	0.0019762
18	KEGG Pyrimidine metabolism	367	0.00354752	0.0019762
10	pid IL6-mediated signaling events	134	0.00355581	0.0019762
11	pid IL2 signaling events mediated by PI3K	162	0.00378096	0.0019762
10	HumanCyc lysine degradation I (saccharopine pathway)	136	0.00386633	0.0019762
19	INOH Thiele2013 - Human metabolism global reconstruction (Recon 2)	404	0.00396883	0.0019762
10	pid ErbB4 signaling events	137	0.00402885	0.0019762
9	Reactome Purine ribonucleoside monophosphate biosynthesis	112	0.0041346	0.0019762
5	NetPath IL5	27	0.00426621	0.0019762
5	KEGG Lysine catabolism	27	0.00426621	0.0019762
26	HumanCyc Metabolic pathways	643	0.00429612	0.0019762
9	Reactome PPARA activates gene expression	113	0.00432897	0.0019762
14	KEGG Alanine, aspartate and glutamate metabolism	252	0.00434357	0.0019762
7	pid Regulation of nuclear SMAD2/3 signaling	66	0.00436951	0.0021887
9	Reactome HDR through MMEJ (alt-NHEJ)	114	0.00452985	0.0021887
13	Reactome Activation of NF-kappaB in B cells	224	0.00454523	0.0021887
6	Reactome BCR	46	0.00462708	0.00242613
9	PANTHER Alzheimer disease-presenilin pathway	115	0.00473734	0.00242613
6	Reactome Constitutive Signaling by NOTCH1 PEST Domain Mutants	47	0.00500536	0.00242613
6	Reactome Constitutive Signaling by NOTCH1 HD+PEST Domain Mutants	47	0.00500536	0.00242613
17	KEGG Purine metabolism	351	0.00505522	0.00242613
9	HumanCyc tRNA charging	117	0.00517259	0.00242613
14	pid Fc-epsilon receptor I signaling in mast cells	260	0.0053924	0.00242613
9	Reactome Synthesis of very long-chain fatty acyl-CoAs	118	0.00540056	0.00242613
14	HumanCyc &gamma	261	0.00553554	0.00242613
13	KEGG Nitrogen metabolism	232	0.00572154	0.00242613
5	DIP BCR	30	0.00587693	0.00242613
7	Reactome Phenylalanine and tyrosine catabolism	71	0.00592533	0.00242613
11	BioGRID TNFalpha	177	0.00636787	0.00242613
13	pid TCR signaling innaïve CD4+ T cells	236	0.00638643	0.00242613
10	Reactome Fatty Acyl-CoA Biosynthesis	149	0.00638779	0.00242613
5	HumanCyc Lysine catabolism	31	0.0064874	0.00242613
8	pid TNF receptor signaling pathway	97	0.00658436	0.00242613
10	HumanCyc acetate conversion to acetyl-CoA	150	0.00662068	0.00242613
9	pid Signaling events mediated by focal adhesion kinase	123	0.00664792	0.00242613
15	KEGG Arginine and proline metabolism	300	0.00672162	0.00242613
17	KEGG Amino sugar and nucleotide sugar metabolism	367	0.00709283	0.00242613
5	Reactome LPA4-mediated signaling events	32	0.0071357	0.00242613
9	pid Role of Calcineurin-dependent NFAT signaling in lymphocytes	125	0.0071988	0.00242613
30	HumanCyc Thiele2013 - Human metabolism global reconstruction (Recon 2)	824	0.00734466	0.00242613
14	pid Endothelins	274	0.00765749	0.00242613
7	Reactome Transcriptional regulation of white adipocyte differentiation	76	0.00781992	0.00242613
5	NetPath ID	33	0.00782236	0.00242613
10	HumanCyc lysine degradation II (pipecolate pathway)	155	0.00787512	0.00242613
13	KEGG beta-Alanine metabolism	245	0.00808252	0.00242613
9	pid EPHA2 forward signaling	129	0.00839347	0.00242613
8	Reactome Glutathione synthesis and recycling	103	0.00861825	0.00242613
7	Reactome Gap-filling DNA repair synthesis and ligation in TC-NER	78	0.00867818	0.00242613
8	Reactome PLC-mediated hydrolysis of PIP2	104	0.00899376	0.00242613
8	Reactome G beta:gamma signalling through PLC beta	104	0.00899376	0.00242613
10	HumanCyc L-kynurenine degradation	160	0.009285	0.00242613
16	pid PDGFR-beta signaling pathway	348	0.00937761	0.00242613
9	HPRD TCR	133	0.00971616	0.00242613
8	BioGRID TCR	106	0.00977703	0.00242613
6	pid Ca2+ pathway	57	0.00994987	0.00242613
9	HumanCyc &beta	136	0.0107948	0.00242613
9	HumanCyc -alanine degradation	136	0.0107948	0.00242613
13	pid BCR signaling pathway	257	0.0108038	0.00242613
12	pid TCR signaling innaïve CD8+ T cells	226	0.0109487	0.00242613
8	Reactome Synthesis of Ketone Bodies	109	0.0110339	0.00242613
8	Reactome G alpha (q) signalling events	109	0.0110339	0.00242613
13	Reactome GPVI-mediated activation cascade	258	0.0110554	0.00242613
9	Reactome Amino acid synthesis and interconversion (transamination)	137	0.0111712	0.00242613
9	KEGG Ubiquinone and other terpenoid-quinone biosynthesis	137	0.0111712	0.00242613
10	HumanCyc oxidative ethanol degradation III	166	0.0111912	0.00242613
10	HumanCyc ethanol degradation II	166	0.0111912	0.00242613
5	pid PLC-mediated hydrolysis of PIP2	38	0.0118442	0.00242613
5	pid G beta:gamma signalling through PLC beta	38	0.0118442	0.00242613
5	pid G alpha (q) signalling events	38	0.0118442	0.00242613
6	Reactome TP53 Regulates Transcription of DNA Repair Genes	60	0.0118707	0.00242613
10	pid FAS (CD95) signaling pathway	169	0.0122346	0.00242613
3	PhosphoSite Cyclin D associated events in G1	6	0.012238	0.00242613
3	PhosphoSite activated TAK1 mediates p38 MAPK activation	6	0.012238	0.00242613
9	HumanCyc -linolenate biosynthesis	140	0.0123514	0.00242613
11	pid Class I PI3K signaling events	200	0.0124537	0.00242613
4	pid Response to elevated platelet cytosolic Ca2+	20	0.0126036	0.00242613
4	PANTHER Endogenous_cannabinoid_signaling	20	0.0126036	0.00242613
7	Reactome Synthesis of bile acids and bile salts via 24-hydroxycholesterol	86	0.0127152	0.00242613
5	pid Wnt signaling pathway	39	0.0127679	0.00242613
8	Reactome Acetylcholine regulates insulin secretion	113	0.0128657	0.00242613
14	pid Signaling events mediated by Hepatocyte Growth Factor Receptor (c-Met)	298	0.0129747	0.00242613
7	Reactome Mitotic Prometaphase	87	0.0132896	0.00242613
7	Reactome Angiogenesis	87	0.0132896	0.00242613
8	Reactome Vitamin B5 (pantothenate) metabolism	114	0.0133519	0.00242613
8	pid Integrin-linked kinase signaling	114	0.0133519	0.00242613
7	Reactome Warburg Effect	88	0.0138797	0.00242613
7	pid JNK signaling in the CD4+ TCR pathway	88	0.0138797	0.00242613
9	pid IL2-mediated signaling events	144	0.0140458	0.00242613
4	IntAct Alpha6Beta4Integrin	21	0.0140828	0.00242613
8	Reactome Ethanol oxidation	116	0.0143585	0.00242613
8	pid S1P4 pathway	116	0.0143585	0.00242613
11	HumanCyc ethanol degradation IV	206	0.0145134	0.00242613
28	Reactome Thiele2013 - Human metabolism global reconstruction (Recon 2)	811	0.0147262	0.00242613
6	Reactome Response to elevated platelet cytosolic Ca2+	64	0.0147599	0.00242613
9	HumanCyc isoleucine degradation	146	0.0149453	0.00242613
7	Reactome Vasopressin regulates renal water homeostasis via Aquaporins	90	0.0151073	0.00242613
3	pid Resolution of Sister Chromatid Cohesion	7	0.0153832	0.00242613
5	SMPDB Amino sugar and nucleotide sugar metabolism	42	0.0157791	0.00242613
10	Reactome EGFR Transactivation by Gastrin	179	0.0161599	0.00242613
10	pid Noncanonical Wnt signaling pathway	179	0.0161599	0.00242613
9	IntAct TNFalpha	149	0.0163604	0.00242613
9	NetPath TCR	150	0.0168496	0.00242613
5	Reactome Sialic acid metabolism	43	0.0168625	0.00242613
9	pid Posttranslational regulation of adherens junction stability and dissassembly	151	0.0173477	0.00242613
11	pid Nongenotropic Androgen signaling	214	0.0175779	0.00242613
8	HumanCyc fatty acid &alpha	122	0.0176539	0.00242613
10	pid Plasma membrane estrogen receptor signaling	183	0.017925	0.00242613
5	Reactome Formation of TC-NER Pre-Incision Complex	44	0.0179854	0.00242613
12	pid Netrin-mediated signaling events	248	0.0180994	0.00242613
3	PANTHER activated TAK1 mediates p38 MAPK activation	8	0.0187997	0.00242613
11	pid ErbB2/ErbB3 signaling events	217	0.0188213	0.00242613
8	Reactome Coenzyme A biosynthesis	124	0.0188444	0.00242613
8	Reactome BCR signaling pathway	124	0.0188444	0.00242613
10	Reactome Processing of DNA double-strand break ends	185	0.0188494	0.00242613
9	Reactome &gamma	154	0.0188947	0.00242613
6	INOH One carbon pool by folate	69	0.0189024	0.00242613
19	KEGG Thiele2013 - Human metabolism global reconstruction (Recon 2)	497	0.0190781	0.00242613
7	HumanCyc Propanoate metabolism	96	0.0191708	0.00242613
6	Reactome Glycine, serine and threonine metabolism	70	0.0198014	0.00242613
6	pid p73 transcription factor network	70	0.0198014	0.00242613
8	HumanCyc threonine degradation	126	0.0200807	0.00242613
10	pid Thromboxane A2 receptor signaling	188	0.0202883	0.00242613
9	HumanCyc leucine degradation	157	0.0205206	0.00242613
7	Reactome RHO GTPases Activate Formins	98	0.0206516	0.00242613
6	Reactome Lysine catabolism	71	0.0207236	0.00242613
10	KEGG One carbon pool by folate	190	0.0212821	0.00242613
8	pid S1P3 pathway	128	0.0213626	0.00242613
7	Reactome Sulfur amino acid metabolism	99	0.0214155	0.00242613
11	Reactome FCERI mediated MAPK activation	223	0.0214613	0.00242613
5	Reactome EPO signaling pathway	47	0.0215881	0.00242613
5	pid Signaling events mediated by HDAC Class II	47	0.0215881	0.00242613
5	PANTHER Activation of NF-kappaB in B cells	47	0.0215881	0.00242613
13	KEGG Pyruvate metabolism	291	0.0216076	0.00242613
9	pid Trk receptor signaling mediated by the MAPK pathway	159	0.0216481	0.00242613
3	PANTHER Asymmetric localization of PCP proteins	9	0.0224643	0.00242613
15	Reactome Ca2+ pathway	364	0.0225827	0.00242613
7	Reactome CDC42 signaling events	101	0.0229898	0.00242613
10	KEGG Fatty acid degradation	194	0.0233521	0.00242613
9	Reactome HCN channels	162	0.023404	0.00242613
9	HumanCyc mevalonate pathway	162	0.023404	0.00242613
13	KEGG Glycine, serine and threonine metabolism	297	0.0239958	0.00242613
9	pid PAR1-mediated thrombin signaling events	163	0.0240063	0.00242613
6	KEGG D-Glutamine and D-glutamate metabolism	75	0.0246421	0.00242613
4	Reactome Molybdenum cofactor biosynthesis	27	0.0246725	0.00242613
8	Reactome Recycling of bile acids and salts	133	0.0247643	0.00242613
8	pid S1P1 pathway	133	0.0247643	0.00242613
13	KEGG Glycolysis / Gluconeogenesis	299	0.0248229	0.00242613
16	SMPDB Thiele2013 - Human metabolism global reconstruction (Recon 2)	407	0.0249125	0.00242613
9	pid RAC1 signaling pathway	165	0.0252364	0.00242613
7	Reactome Synthesis of bile acids and bile salts via 7alpha-hydroxycholesterol	104	0.0254662	0.00242613
6	Reactome Synthesis of UDP-N-acetyl-glucosamine	76	0.025678	0.00242613
7	KEGG Purine nucleotides and Nucleosides metabolism ( Purine nucleotides and Nucleosides metabolism )	105	0.0263218	0.00242613
3	Reactome lysine degradation I (saccharopine pathway)	10	0.0263552	0.00242613
3	pid activated TAK1 mediates p38 MAPK activation	10	0.0263552	0.00242613
3	HumanCyc Biosynthesis of the N-glycan precursor (dolichol lipid-linked oligosaccharide, LLO) and transfer to a nascent protein	10	0.0263552	0.00242613
9	Reactome Synthesis and interconversion of nucleotide di- and triphosphates	167	0.0264999	0.00242613
10	pid IL8- and CXCR2-mediated signaling events	200	0.0266586	0.00242613
4	Reactome TNF receptor signaling pathway	28	0.0267066	0.00242613
4	Reactome Aminoacyl-tRNA biosynthesis	28	0.0267066	0.00242613
4	NetPath Fc-epsilon receptor I signaling in mast cells	28	0.0267066	0.00242613
5	Reactome Ephrin B reverse signaling	51	0.0269217	0.00242613
11	pid CXCR3-mediated signaling events	235	0.0273398	0.00242613
8	Reactome Signaling events mediated by VEGFR1 and VEGFR2	137	0.0276837	0.00242613
10	pid VEGFR3 signaling in lymphatic endothelium	202	0.0278132	0.00242613
6	Reactome Arachidonate production from DAG	78	0.027816	0.00242613
5	INOH Amino sugar and nucleotide sugar metabolism	52	0.0283462	0.00242613
11	Reactome Signaling by FGFR3 fusions in cancer	237	0.0283944	0.00242613
11	Reactome Downstream signal transduction	237	0.0283944	0.00242613
11	Reactome Constitutive Signaling by EGFRvIII	237	0.0283944	0.00242613
9	HumanCyc superpathway of geranylgeranyldiphosphate biosynthesis I (via mevalonate)	170	0.0284566	0.00242613
4	Reactome Biosynthesis of the N-glycan precursor (dolichol lipid-linked oligosaccharide, LLO) and transfer to a nascent protein	29	0.0288118	0.00242613
6	Reactome ethanol degradation IV	79	0.0289174	0.00242613
6	pid PAR4-mediated thrombin signaling events	79	0.0289174	0.00242613
11	Reactome Signaling by FGFR4 in disease	238	0.0289294	0.00242613
11	Reactome Signaling by FGFR3 point mutants in cancer	238	0.0289294	0.00242613
11	Reactome Signaling by FGFR2 in disease	238	0.0289294	0.00242613
11	Reactome Signaling by FGFR1 in disease	238	0.0289294	0.00242613
11	Reactome Constitutive Signaling by Ligand-Responsive EGFR Cancer Variants	238	0.0289294	0.00242613
7	pid Urokinase-type plasminogen activator (uPA) and uPAR-mediated signaling	108	0.0289772	0.00242613
9	pid Regulation of Telomerase	171	0.0291249	0.00242613
8	Reactome Signaling events mediated by Hepatocyte Growth Factor Receptor (c-Met)	139	0.0292074	0.00242613
10	Reactome Regulation of actin dynamics for phagocytic cup formation	205	0.0295928	0.00242613
5	Reactome acyl carrier protein metabolism	53	0.0298058	0.00242613
5	HumanCyc Vitamin B5 (pantothenate) metabolism	53	0.0298058	0.00242613
7	Reactome Nephrin/Neph1 signaling in the kidney podocyte	109	0.0298913	0.00242613
7	Reactome IFN-gamma pathway	109	0.0298913	0.00242613
16	Reactome FCERI mediated Ca+2 mobilization	421	0.0299243	0.00242613
8	Reactome Synthesis of IP3 and IP4 in the cytosol	140	0.029985	0.00242613
6	Reactome Astrocytic Glutamate-Glutamine Uptake And Metabolism	80	0.03004	0.00242613
3	INOH p38 MAPK pathway	11	0.0304515	0.00242613
8	Reactome CLEC7A (Dectin-1) signaling	141	0.0307728	0.00242613
10	pid CXCR4-mediated signaling events	207	0.0308104	0.00242613
12	Reactome DAP12 signaling	277	0.030983	0.00242613
4	Reactome Cyclin D associated events in G1	30	0.0309858	0.00242613
4	PANTHER TCA cycle	30	0.0309858	0.00242613
6	INOH Arginine and proline metabolism	81	0.0311835	0.00242613
14	KEGG Glycerophospholipid metabolism	350	0.031249	0.00242613
10	pid Trk receptor signaling mediated by PI3K and PLC-gamma	208	0.0314283	0.00242613
7	Reactome LPA receptor mediated events	112	0.0327179	0.00242613
5	Reactome Nicotinate metabolism	55	0.0328274	0.00242613
5	Reactome acetyl-CoA biosynthesis from citrate	55	0.0328274	0.00242613
8	Reactome TCR signaling innaïve CD8+ T cells	144	0.0331967	0.00242613
4	PANTHER PI3 kinase pathway	31	0.0332261	0.00242613
4	PANTHER p38 MAPK pathway	31	0.0332261	0.00242613
4	INOH Cytosolic tRNA aminoacylation	31	0.0332261	0.00242613
4	HumanCyc Cystinosis, ocular nonnephropathic	31	0.0332261	0.00242613
4	HumanCyc Cysteine Metabolism	31	0.0332261	0.00242613
4	HumanCyc Beta-mercaptolactate-cysteine disulfiduria	31	0.0332261	0.00242613
9	KEGG Aminoacyl-tRNA biosynthesis	177	0.0332985	0.00242613
10	KEGG Pantothenate and CoA biosynthesis	211	0.0333178	0.00242613
6	pid LPA4-mediated signaling events	83	0.0335319	0.00242613
7	HumanCyc acyl carrier protein metabolism	113	0.0336876	0.00242613
12	Reactome Signaling by SCF-KIT	283	0.0341002	0.00242613
11	Reactome PLC beta mediated events	248	0.0345506	0.00242613
3	pid Cyclin D associated events in G1	12	0.0347334	0.00242613
9	pid Signaling events regulated by Ret tyrosine kinase	179	0.0347498	0.00242613
8	Reactome TCR signaling innaïve CD4+ T cells	146	0.0348617	0.00242613
8	HumanCyc -oxidation	146	0.0348617	0.00242613
11	KEGG Nicotinate and nicotinamide metabolism	249	0.0351386	0.00242613
7	HumanCyc 2-amino-3-carboxymuconate semialdehyde degradation to glutaryl-CoA	115	0.0356668	0.00242613
8	pid mTOR signaling pathway	147	0.0357084	0.00242613
11	pid VEGFR1 specific signals	250	0.035731	0.00242613
13	SMPDB Metabolic pathways	323	0.0358683	0.00242613
5	Reactome Asymmetric localization of PCP proteins	57	0.0359804	0.00242613
9	KEGG Lysine degradation	181	0.0362297	0.00242613
11	Reactome DAG and IP3 signaling	251	0.0363279	0.00242613
8	HumanCyc stearate biosynthesis	148	0.0365644	0.00242613
7	HumanCyc 2-oxoisovalerate decarboxylation to isobutanoyl-CoA	116	0.0366759	0.00242613
9	Reactome CD28 dependent PI3K/Akt signaling	182	0.0369802	0.00242613
16	Reactome Regulation of insulin secretion	439	0.0369949	0.00242613
6	PANTHER Huntington disease	86	0.037202	0.00242613
8	HumanCyc mitochondrial L-carnitine shuttle	149	0.0374296	0.00242613
4	pid Acetylcholine regulates insulin secretion	33	0.0378952	0.00242613
9	HumanCyc superpathway of cholesterol biosynthesis	184	0.0385015	0.00242613
7	HumanCyc acetyl-CoA biosynthesis from citrate	118	0.0387318	0.00242613
3	Reactome WNT5A-dependent internalization of FZD2, FZD5 and ROR2	13	0.039182	0.00242613
3	Reactome lysine degradation II (pipecolate pathway)	13	0.039182	0.00242613
3	KEGG Cytosolic tRNA aminoacylation	13	0.039182	0.00242613
3	INOH Canonical Wnt signaling pathway ( Xenopus axis formation Wnt signaling pathway Diagram )	13	0.039182	0.00242613
3	INOH Canonical Wnt signaling pathway ( Mammalian Wnt signaling pathway Diagram )	13	0.039182	0.00242613
3	INOH Canonical Wnt signaling pathway ( Drosophila Wingless/Wnt signaling pathway Diagram )	13	0.039182	0.00242613
3	INOH Canonical Wnt signaling pathway ( C. elegans endoderm induction Wnt signaling pathway Diagram )	13	0.039182	0.00242613
3	INOH Canonical Wnt signaling pathway ( Canonical Wnt signaling pathway Diagram )	13	0.039182	0.00242613
5	pid EGFR Transactivation by Gastrin	59	0.0392579	0.00242613
5	HumanCyc Synthesis of bile acids and bile salts via 24-hydroxycholesterol	59	0.0392579	0.00242613
9	KEGG Steroid biosynthesis	185	0.039272	0.00242613
6	Reactome FAS (CD95) signaling pathway	88	0.0397425	0.00242613
6	PANTHER Signaling events mediated by VEGFR1 and VEGFR2	88	0.0397425	0.00242613
7	pid Regulation of Ras family activation	119	0.0397782	0.00242613
13	Reactome VEGFR2 mediated cell proliferation	331	0.0399574	0.00242613
8	pid Insulin Pathway	152	0.0400784	0.00242613
8	HumanCyc glutaryl-CoA degradation	152	0.0400784	0.00242613
4	BioGRID Alpha6Beta4Integrin	34	0.0403186	0.00242613
7	HumanCyc cysteine biosynthesis	120	0.0408364	0.00242613
8	pid S1P2 pathway	154	0.0418868	0.00242613
5	Reactome fatty acid &alpha	61	0.0426529	0.00242613
5	HumanCyc Cytosolic tRNA aminoacylation	61	0.0426529	0.00242613
4	Reactome Hypoacetylaspartia	35	0.0427976	0.00242613
4	Reactome Formation of Incision Complex in GG-NER	35	0.0427976	0.00242613
4	Reactome Canavan Disease	35	0.0427976	0.00242613
4	Reactome Aspartate Metabolism	35	0.0427976	0.00242613
4	KEGG GABA shunt	35	0.0427976	0.00242613
8	SMPDB Warburg Effect	155	0.0428032	0.00242613
7	pid Signaling events mediated by PRL	122	0.0429874	0.00242613
7	pid ALK1 signaling events	122	0.0429874	0.00242613
9	HumanCyc bile acid biosynthesis, neutral pathway	190	0.0432194	0.00242613
12	Reactome CLEC7A (Dectin-1) induces NFAT activation	300	0.0436251	0.00242613
6	INOH Alanine, aspartate and glutamate metabolism	91	0.0436848	0.00242613
3	Reactome Receptor-ligand binding initiates the second proteolytic cleavage of Notch receptor	14	0.0437794	0.00242613
3	Reactome p38 MAPK pathway	14	0.0437794	0.00242613
7	pid Syndecan-2-mediated signaling events	123	0.0440797	0.00242613
13	Reactome Phase 2 - plateau phase	339	0.0442112	0.00242613
9	KEGG Primary bile acid biosynthesis	192	0.0448398	0.00242613
7	HumanCyc fatty acid activation	124	0.0451827	0.00242613
4	Reactome TRAIL signaling pathway	36	0.0453294	0.00242613
4	Reactome beta-Alanine metabolism	36	0.0453294	0.00242613
4	NetPath Hedgehog	36	0.0453294	0.00242613
8	HumanCyc ketolysis	158	0.0455992	0.00242613
8	HumanCyc ketogenesis	158	0.0455992	0.00242613
11	pid FGF signaling pathway	266	0.0457586	0.00242613
13	Reactome Sperm Motility And Taxes	342	0.0458432	0.00242613
5	Reactome RhoA signaling pathway	63	0.0461574	0.00242613
5	Reactome fatty acid activation	63	0.0461574	0.00242613
5	Reactome Arginine and proline metabolism	63	0.0461574	0.00242613
9	pid IL8- and CXCR1-mediated signaling events	194	0.0464824	0.00242613
6	SMPDB Urea Cycle	94	0.0477736	0.00242613
6	SMPDB Ornithine Transcarbamylase Deficiency (OTC Deficiency)	94	0.0477736	0.00242613
6	SMPDB Citrullinemia Type I	94	0.0477736	0.00242613
6	SMPDB Carbamoyl Phosphate Synthetase Deficiency	94	0.0477736	0.00242613
6	SMPDB Argininosuccinic Aciduria	94	0.0477736	0.00242613
6	SMPDB Argininemia	94	0.0477736	0.00242613
6	Reactome Purine nucleotides and Nucleosides metabolism ( Purine nucleotides and Nucleosides metabolism )	94	0.0477736	0.00242613
4	Reactome Propanoate metabolism	37	0.0479111	0.00242613
13	Reactome Downstream TCR signaling	346	0.0480464	0.00242613
3	Reactome dolichyl-diphosphooligosaccharide biosynthesis	15	0.0485085	0.00242613
3	Reactome Constitutive Signaling by NOTCH1 HD Domain Mutants	15	0.0485085	0.00242613
3	pid Sumoylation by RanBP2 regulates transcriptional repression	15	0.0485085	0.00242613
3	PhosphoSite Resolution of Sister Chromatid Cohesion	15	0.0485085	0.00242613
3	KEGG lysine degradation I (saccharopine pathway)	15	0.0485085	0.00242613
3	INOH Oxidative Stress Induced Senescence	15	0.0485085	0.00242613
3	INOH Galactose metabolism ( Galactose metabolism )	15	0.0485085	0.00242613
3	INOH Aminoacyl-tRNA biosynthesis	15	0.0485085	0.00242613
7	HumanCyc 2-oxobutanoate degradation	127	0.0485533	0.00242613
8	pid GMCSF-mediated signaling events	162	0.0494285	0.00242613
5	PANTHER IFN-gamma pathway	65	0.0497637	0.00242613
4	Reactome a6b1 and a6b4 Integrin signaling	38	0.0505398	0.00242613
4	INOH Steroids metabolism ( Steroids metabolism )	38	0.0505398	0.00242613
4	HumanCyc TCA cycle	38	0.0505398	0.00242613
6	Reactome Neurotrophic factor-mediated Trk receptor signaling	96	0.0505742	0.00242613
6	Reactome Fc-epsilon receptor I signaling in mast cells	96	0.0505742	0.00242613
9	KEGG Butanoate metabolism	199	0.0506775	0.00242613
5	Reactome Succinic semialdehyde dehydrogenase deficiency	66	0.0516023	0.00242613
5	Reactome Hyperinsulinism-Hyperammonemia Syndrome	66	0.0516023	0.00242613
5	Reactome Homocarnosinosis	66	0.0516023	0.00242613
5	Reactome Glutamate Metabolism	66	0.0516023	0.00242613
5	Reactome Activation of RAS in B cells	66	0.0516023	0.00242613
5	Reactome 4-Hydroxybutyric Aciduria/Succinic Semialdehyde Dehydrogenase Deficiency	66	0.0516023	0.00242613
5	Reactome 2-Hydroxyglutric Aciduria (D And L Form)	66	0.0516023	0.00242613
5	PANTHER Fc-epsilon receptor I signaling in mast cells	66	0.0516023	0.00242613
8	HumanCyc icosapentaenoate biosynthesis II (metazoa)	165	0.0523692	0.00242613
9	Reactome Gluconeogenesis	201	0.0523878	0.00242613
4	Reactome Xanthinuria type II	39	0.0532127	0.00242613
4	Reactome Xanthinuria type I	39	0.0532127	0.00242613
4	Reactome Xanthine Dehydrogenase Deficiency (Xanthinuria)	39	0.0532127	0.00242613
4	Reactome Purine Nucleoside Phosphorylase Deficiency	39	0.0532127	0.00242613
4	Reactome Purine Metabolism	39	0.0532127	0.00242613
4	Reactome O-glycosylation of TSR domain-containing proteins	39	0.0532127	0.00242613
4	Reactome Myoadenylate deaminase deficiency	39	0.0532127	0.00242613
4	Reactome Molybdenum Cofactor Deficiency	39	0.0532127	0.00242613
4	Reactome Mitochondrial DNA depletion syndrome	39	0.0532127	0.00242613
4	Reactome Lesch-Nyhan Syndrome (LNS)	39	0.0532127	0.00242613
4	Reactome Gout or Kelley-Seegmiller Syndrome	39	0.0532127	0.00242613
4	Reactome AICA-Ribosiduria	39	0.0532127	0.00242613
4	Reactome Adenylosuccinate Lyase Deficiency	39	0.0532127	0.00242613
4	Reactome Adenosine Deaminase Deficiency	39	0.0532127	0.00242613
4	Reactome Adenine phosphoribosyltransferase deficiency (APRT)	39	0.0532127	0.00242613
3	PhosphoSite PLK1 signaling events	16	0.0533532	0.00242613
3	HumanCyc Synthesis of Dolichyl-phosphate	16	0.0533532	0.00242613
5	SMPDB Purine metabolism	67	0.0534631	0.00242613
5	HumanCyc Synthesis of very long-chain fatty acyl-CoAs	67	0.0534631	0.00242613
8	Reactome RHO GTPases Activate WASPs and WAVEs	167	0.054359	0.00242613
12	Reactome Effects of PIP2 hydrolysis	318	0.0545556	0.00242613
5	pid FoxO family signaling	68	0.0553452	0.00242613
7	HumanCyc tryptophan degradation	133	0.0555432	0.00242613
4	INOH Hypoacetylaspartia	40	0.0559268	0.00242613
4	INOH Canavan Disease	40	0.0559268	0.00242613
4	INOH Aspartate Metabolism	40	0.0559268	0.00242613
5	Reactome oxidative ethanol degradation III	69	0.0572473	0.00242613
5	Reactome ethanol degradation II	69	0.0572473	0.00242613
5	Reactome acetate conversion to acetyl-CoA	69	0.0572473	0.00242613
9	pid RhoA signaling pathway	207	0.0576125	0.00242613
6	pid Canonical Wnt signaling pathway	101	0.0578056	0.00242613
7	Reactome Voltage gated Potassium channels	135	0.0579371	0.00242613
7	Reactome TWIK-releated acid-sensitive K+ channel (TASK)	135	0.0579371	0.00242613
7	Reactome TWIK-related spinal cord K+ channel (TRESK)	135	0.0579371	0.00242613
7	Reactome TWIK related potassium channel (TREK)	135	0.0579371	0.00242613
7	Reactome TWIK-related alkaline pH activated K+ channel (TALK)	135	0.0579371	0.00242613
7	Reactome The NLRP3 inflammasome	135	0.0579371	0.00242613
7	Reactome Tandem pore domain halothane-inhibited K+ channel (THIK)	135	0.0579371	0.00242613
7	Reactome Tandem of pore domain in a weak inwardly rectifying K+ channels (TWIK)	135	0.0579371	0.00242613
7	Reactome Potassium transport channels	135	0.0579371	0.00242613
7	Reactome Phase 4 - resting membrane potential	135	0.0579371	0.00242613
7	Reactome Phase 3 - rapid repolarisation	135	0.0579371	0.00242613
7	Reactome Inhibition of voltage gated Ca2+ channels via Gbeta/gamma subunits	135	0.0579371	0.00242613
7	Reactome Defective ABCC8 can cause hypoglycemias and hyperglycemias	135	0.0579371	0.00242613
7	Reactome Classical Kir channels	135	0.0579371	0.00242613
7	Reactome Ca activated K+ channels	135	0.0579371	0.00242613
7	Reactome ATP sensitive Potassium channels	135	0.0579371	0.00242613
7	Reactome Activation of G protein gated Potassium channels	135	0.0579371	0.00242613
3	Reactome Regulation of FZD by ubiquitination	17	0.0582982	0.00242613
3	Reactome Glucagon signaling in metabolic regulation	17	0.0582982	0.00242613
3	Reactome Fructose and mannose metabolism	17	0.0582982	0.00242613
3	PhosphoSite Oxidative Stress Induced Senescence	17	0.0582982	0.00242613
3	KEGG aspartate biosynthesis	17	0.0582982	0.00242613
3	BIND Wnt	17	0.0582982	0.00242613
4	Reactome Glucose-Alanine Cycle	41	0.0586794	0.00242613
4	Reactome Cobalamin (Cbl, vitamin B12) transport and metabolism	41	0.0586794	0.00242613
4	Reactome Ammonia Recycling	41	0.0586794	0.00242613
4	BioGRID IL4	41	0.0586794	0.00242613
13	Reactome Ligand-gated ion channel transport	365	0.0588173	0.00242613
7	SMPDB Succinic semialdehyde dehydrogenase deficiency	136	0.0591445	0.00242613
7	SMPDB Hyperinsulinism-Hyperammonemia Syndrome	136	0.0591445	0.00242613
7	SMPDB Homocarnosinosis	136	0.0591445	0.00242613
7	SMPDB Glutamate Metabolism	136	0.0591445	0.00242613
7	SMPDB 4-Hydroxybutyric Aciduria/Succinic Semialdehyde Dehydrogenase Deficiency	136	0.0591445	0.00242613
7	SMPDB 2-Hydroxyglutric Aciduria (D And L Form)	136	0.0591445	0.00242613
7	Reactome Phospholipase C-mediated cascade: FGFR1	136	0.0591445	0.00242613
7	Reactome Phospholipase C-mediated cascade	136	0.0591445	0.00242613
7	Reactome FGFR4	136	0.0591445	0.00242613
7	Reactome FGFR3	136	0.0591445	0.00242613
7	Reactome FGFR2	136	0.0591445	0.00242613
5	Reactome tRNA charging	70	0.0591684	0.00242613
5	Reactome Purine metabolism	70	0.0591684	0.00242613
5	IntAct TCR	70	0.0591684	0.00242613
6	Reactome Recruitment and ATM-mediated phosphorylation of repair and signaling proteins at DNA double strand breaks	102	0.0592869	0.00242613
6	PANTHER GPVI-mediated activation cascade	102	0.0592869	0.00242613
8	Reactome PI3K events in ERBB4 signaling	172	0.0594232	0.00242613
8	Reactome PI3K events in ERBB2 signaling	172	0.0594232	0.00242613
8	Reactome PI-3K cascade:FGFR4	172	0.0594232	0.00242613
8	Reactome PI-3K cascade:FGFR3	172	0.0594232	0.00242613
8	Reactome PI-3K cascade:FGFR2	172	0.0594232	0.00242613
8	Reactome PI-3K cascade:FGFR1	172	0.0594232	0.00242613
8	Reactome Constitutive Signaling by Aberrant PI3K in Cancer	172	0.0594232	0.00242613
10	Reactome Cation-coupled Chloride cotransporters	248	0.0601046	0.00242613
5	SMPDB Saccharopinuria/Hyperlysinemia II	71	0.0611074	0.00242613
5	SMPDB Pyridoxine dependency with seizures	71	0.0611074	0.00242613
5	SMPDB Lysine Degradation	71	0.0611074	0.00242613
5	SMPDB Hyperlysinemia II or Saccharopinuria	71	0.0611074	0.00242613
5	SMPDB Hyperlysinemia I, Familial	71	0.0611074	0.00242613
5	SMPDB 2-aminoadipic 2-oxoadipic aciduria	71	0.0611074	0.00242613
5	Reactome Noncanonical Wnt signaling pathway	71	0.0611074	0.00242613
5	HumanCyc Synthesis of bile acids and bile salts via 7alpha-hydroxycholesterol	71	0.0611074	0.00242613
5	HumanCyc Ethanol oxidation	71	0.0611074	0.00242613
9	Reactome VEGFA-VEGFR2 Pathway	211	0.0611605	0.00242613
4	INOH Pyruvate metabolism ( Pyruvate metabolism )	42	0.0614674	0.00242613
8	pid PDGFR-alpha signaling pathway	174	0.0614798	0.00242613
7	Reactome NCAM signaling for neurite out-growth	138	0.0615784	0.00242613
6	Reactome CXCR4-mediated signaling events	104	0.0622798	0.00242613
6	HumanCyc Arginine and proline metabolism	104	0.0622798	0.00242613
10	KEGG Propanoate metabolism	251	0.0624639	0.00242613
8	Reactome Role of LAT2/NTAL/LAB on calcium mobilization	175	0.0625137	0.00242613
8	Reactome PI3K/AKT activation	175	0.0625137	0.00242613
7	PANTHER Thiele2013 - Human metabolism global reconstruction (Recon 2)	139	0.0628043	0.00242613
9	KEGG Cysteine and methionine metabolism	213	0.0629498	0.00242613
9	HumanCyc UDP-N-acetyl-D-galactosamine biosynthesis II	213	0.0629498	0.00242613
3	Reactome Synthesis of Dolichyl-phosphate	18	0.063329	0.00242613
3	Reactome mRNA decay by 5' to 3' exoribonuclease	18	0.063329	0.00242613
3	Reactome inosine-5'-phosphate biosynthesis	18	0.063329	0.00242613
3	Reactome activated TAK1 mediates p38 MAPK activation	18	0.063329	0.00242613
3	PhosphoSite p38 MAPK pathway	18	0.063329	0.00242613
3	HPRD Hedgehog	18	0.063329	0.00242613
8	Reactome GAB1 signalosome	176	0.0635511	0.00242613
2	PhosphoSite Synthesis of Leukotrienes (LT) and Eoxins (EX)	2	0.0641926	0.00242613
2	PANTHER Class B/2 (Secretin family receptors)	2	0.0641926	0.00242613
2	INOH Sphingolipid metabolism	2	0.0641926	0.00242613
2	INOH Glycosphingolipid biosynthesis - ganglio series	2	0.0641926	0.00242613
2	INOH Glycosaminoglycan degradation	2	0.0641926	0.00242613
4	Reactome RAC1 signaling pathway	43	0.064288	0.00242613
4	Reactome PDGFR-alpha signaling pathway	43	0.064288	0.00242613
4	Reactome Canonical Wnt signaling pathway	43	0.064288	0.00242613
4	PhosphoSite BCR	43	0.064288	0.00242613
4	INOH NAD+ + CoA + (S)-Methyl-malonate semialdehyde => NADH + Propanoyl-CoA + CO2 ( Valine,Leucine and Isoleucine degradation )	43	0.064288	0.00242613
4	INOH NAD+ + CoA + (S)-Methyl-malonate semialdehyde => NADH + Propanoyl-CoA + CO2 ( Propanoate metabolism )	43	0.064288	0.00242613
9	Reactome Glutamate Neurotransmitter Release Cycle	215	0.0647473	0.00242613
14	Reactome Antigen activates B Cell Receptor (BCR) leading to generation of second messengers	417	0.0647493	0.00242613
5	Reactome PAR1-mediated thrombin signaling events	73	0.0650344	0.00242613
5	pid Antigen activates B Cell Receptor (BCR) leading to generation of second messengers	73	0.0650344	0.00242613
5	INOH Pyrimidine Nucleotides and Nucleosides metabolism ( Pyrimidine Nucleotides and Nucleosides metabolism )	74	0.0670202	0.00242613
5	HumanCyc Recycling of bile acids and salts	74	0.0670202	0.00242613
4	Reactome Transcription-Coupled Nucleotide Excision Repair (TC-NER)	44	0.0671383	0.00242613
4	Reactome COPI-mediated anterograde transport	44	0.0671383	0.00242613
4	pid Validated transcriptional targets of deltaNp63 isoforms	44	0.0671383	0.00242613
4	KEGG Xanthinuria type II	44	0.0671383	0.00242613
4	KEGG Xanthinuria type I	44	0.0671383	0.00242613
4	KEGG Xanthine Dehydrogenase Deficiency (Xanthinuria)	44	0.0671383	0.00242613
4	KEGG Purine Nucleoside Phosphorylase Deficiency	44	0.0671383	0.00242613
4	KEGG Purine Metabolism	44	0.0671383	0.00242613
4	KEGG Myoadenylate deaminase deficiency	44	0.0671383	0.00242613
4	KEGG Molybdenum Cofactor Deficiency	44	0.0671383	0.00242613
4	KEGG Mitochondrial DNA depletion syndrome	44	0.0671383	0.00242613
4	KEGG Lesch-Nyhan Syndrome (LNS)	44	0.0671383	0.00242613
4	KEGG Gout or Kelley-Seegmiller Syndrome	44	0.0671383	0.00242613
4	KEGG AICA-Ribosiduria	44	0.0671383	0.00242613
4	KEGG Adenylosuccinate Lyase Deficiency	44	0.0671383	0.00242613
4	KEGG Adenosine Deaminase Deficiency	44	0.0671383	0.00242613
4	KEGG Adenine phosphoribosyltransferase deficiency (APRT)	44	0.0671383	0.00242613
4	HPRD Alpha6Beta4Integrin	44	0.0671383	0.00242613
10	Reactome PI5P, PP2A and IER3 Regulate PI3K/AKT Signaling	257	0.0672148	0.00242613
14	Reactome Role of phospholipids in phagocytosis	422	0.0673764	0.00242613
9	Reactome WNT mediated activation of DVL	218	0.0674562	0.00242613
8	Reactome Inactivation, recovery and regulation of the phototransduction cascade	180	0.0677303	0.00242613
8	pid Arf6 downstream pathway	180	0.0677303	0.00242613
8	KEGG N-Glycan biosynthesis	180	0.0677303	0.00242613
7	HumanCyc 2'-deoxy-&alpha	143	0.0677581	0.00242613
10	KEGG Valine, leucine and isoleucine degradation	258	0.0680092	0.00242613
6	pid GPVI-mediated activation cascade	108	0.0683708	0.00242613
6	HumanCyc Valine, leucine and isoleucine degradation	108	0.0683708	0.00242613
8	Reactome Signaling by cytosolic FGFR1 fusion mutants	181	0.0687812	0.00242613
8	Reactome PIP3 activates AKT signaling	181	0.0687812	0.00242613
4	Reactome Valine, leucine and isoleucine degradation	45	0.0700155	0.00242613
4	KEGG Cyanoamino acid metabolism	45	0.0700155	0.00242613
4	HPRD Prolactin	45	0.0700155	0.00242613
4	HPRD IL4	45	0.0700155	0.00242613
5	SMPDB Glucose-Alanine Cycle	76	0.0710308	0.00242613
5	Reactome Hedgehog 'on' state	76	0.0710308	0.00242613
6	Reactome Unblocking of NMDA receptor, glutamate binding and activation	379	0.071079	0.00242613
6	pid Arf1 pathway	110	0.0714594	0.00242613
6	pid a6b1 and a6b4 Integrin signaling	110	0.0714594	0.00242613
7	Reactome TP53 Regulates Metabolic Genes	146	0.0715164	0.00242613
7	PANTHER Angiotensin_II-stimulated_signaling_through_G_proteins_and_beta-arrestin	147	0.0727753	0.00242613
4	pid CD28 dependent Vav1 pathway	46	0.0729167	0.00242613
4	INOH tRNA charging	46	0.0729167	0.00242613
8	Reactome CD28 dependent Vav1 pathway	185	0.0730022	0.00242613
6	pid Syndecan-1-mediated signaling events	111	0.0730124	0.00242613
3	Reactome Signaling by NODAL	20	0.0735935	0.00242613
3	Reactome Regulation of retinoblastoma protein	20	0.0735935	0.00242613
3	Reactome PLK1 signaling events	20	0.0735935	0.00242613
3	Reactome Lysine degradation	20	0.0735935	0.00242613
3	PANTHER TNF receptor signaling pathway	20	0.0735935	0.00242613
3	PANTHER Oxidative Stress Induced Senescence	20	0.0735935	0.00242613
3	KEGG asparagine biosynthesis	20	0.0735935	0.00242613
3	DIP IL2	20	0.0735935	0.00242613
5	SMPDB Pyruvate Carboxylase Deficiency	78	0.0750858	0.00242613
5	SMPDB Primary Hyperoxaluria Type I	78	0.0750858	0.00242613
5	SMPDB Lactic Acidemia	78	0.0750858	0.00242613
5	SMPDB Alanine Metabolism	78	0.0750858	0.00242613
5	Reactome G alpha (s) signalling events	78	0.0750858	0.00242613
5	HumanCyc Synthesis of Ketone Bodies	78	0.0750858	0.00242613
8	Reactome G beta:gamma signalling through PI3Kgamma	187	0.0751194	0.00242613
4	SMPDB One carbon pool by folate	47	0.0758392	0.00242613
4	Reactome IGF1 pathway	47	0.0758392	0.00242613
4	HumanCyc inosine-5'-phosphate biosynthesis	47	0.0758392	0.00242613
6	Reactome G alpha (i) signalling events	113	0.0761327	0.00242613
8	Reactome Amino acid transport across the plasma membrane	188	0.0761789	0.00242613
7	KEGG Glycerolipid metabolism	150	0.0765656	0.00242613
7	HumanCyc -D-ribose 1-phosphate degradation	150	0.0765656	0.00242613
5	Reactome Glucagon-like Peptide-1 (GLP1) regulates insulin secretion	79	0.0771271	0.00242613
5	Reactome G alpha (z) signalling events	79	0.0771271	0.00242613
5	Reactome bile acid biosynthesis, neutral pathway	79	0.0771271	0.00242613
5	PANTHER Ca2+ pathway	79	0.0771271	0.00242613
7	HumanCyc -oxidation (peroxisome)	151	0.0778323	0.00242613
7	HumanCyc fatty acid &beta	151	0.0778323	0.00242613
4	KEGG tRNA charging	48	0.0787801	0.00242613
4	BioGRID IL3	48	0.0787801	0.00242613
3	Reactome Notch signaling pathway	21	0.0788019	0.00242613
3	pid p38 MAPK pathway	21	0.0788019	0.00242613
3	pid Alzheimer disease-presenilin pathway	21	0.0788019	0.00242613
3	KEGG Tyrosinemia Type 3 (TYRO3)	21	0.0788019	0.00242613
3	KEGG Tyrosinemia Type 2 (or Richner-Hanhart syndrome)	21	0.0788019	0.00242613
3	KEGG Phenylketonuria	21	0.0788019	0.00242613
3	KEGG Phenylalanine and Tyrosine Metabolism	21	0.0788019	0.00242613
3	HumanCyc hypusine biosynthesis	21	0.0788019	0.00242613
3	DIP Wnt	21	0.0788019	0.00242613
7	Reactome Negative regulation of the PI3K/AKT network	152	0.0791	0.00242613
5	SMPDB Ammonia Recycling	80	0.0791762	0.00242613
5	pid Validated targets of C-MYC transcriptional activation	80	0.0791762	0.00242613
6	Reactome Trk receptor signaling mediated by PI3K and PLC-gamma	115	0.0792681	0.00242613
6	PANTHER Metabolic pathways	115	0.0792681	0.00242613
6	pid DAP12 signaling	116	0.08084	0.00242613
6	PANTHER Role of phospholipids in phagocytosis	116	0.08084	0.00242613
5	Reactome -linolenate biosynthesis	81	0.0812318	0.00242613
5	pid Angiogenesis	81	0.0812318	0.00242613
5	HumanCyc Amino acid synthesis and interconversion (transamination)	81	0.0812318	0.00242613
4	Reactome Urea Cycle	49	0.0817368	0.00242613
4	Reactome Ornithine Transcarbamylase Deficiency (OTC Deficiency)	49	0.0817368	0.00242613
4	Reactome Citrullinemia Type I	49	0.0817368	0.00242613
4	Reactome Carbamoyl Phosphate Synthetase Deficiency	49	0.0817368	0.00242613
4	Reactome Argininosuccinic Aciduria	49	0.0817368	0.00242613
4	Reactome Argininemia	49	0.0817368	0.00242613
4	pid CLEC7A (Dectin-1) signaling	49	0.0817368	0.00242613
4	PANTHER Metabotropic glutamate receptor group II pathway	49	0.0817368	0.00242613
4	KEGG Thioguanine Action Pathway	49	0.0817368	0.00242613
4	KEGG Mercaptopurine Action Pathway	49	0.0817368	0.00242613
4	KEGG Azathioprine Action Pathway	49	0.0817368	0.00242613
2	Reactome Lysosomal oligosaccharide catabolism	3	0.0836766	0.00242613
2	Reactome Constitutive Signaling by NOTCH1 t(7	3	0.0836766	0.00242613
2	Reactome 9)(NOTCH1:M1580_K2555) Translocation Mutant	3	0.0836766	0.00242613
2	pid Class B/2 (Secretin family receptors)	3	0.0836766	0.00242613
2	PANTHER Activation of SMO	3	0.0836766	0.00242613
2	INOH Constitutive Signaling by NOTCH1 t(7	3	0.0836766	0.00242613
2	INOH Constitutive Signaling by NOTCH1 HD Domain Mutants	3	0.0836766	0.00242613
2	INOH 9)(NOTCH1:M1580_K2555) Translocation Mutant	3	0.0836766	0.00242613
6	INOH Purine metabolism	118	0.0839892	0.00242613
3	Reactome Cystinosis, ocular nonnephropathic	22	0.0840453	0.00242613
3	Reactome Cysteine Metabolism	22	0.0840453	0.00242613
3	Reactome Beta-mercaptolactate-cysteine disulfiduria	22	0.0840453	0.00242613
3	Reactome BBSome-mediated cargo-targeting to cilium	22	0.0840453	0.00242613
3	pid Activation of RAS in B cells	22	0.0840453	0.00242613
3	KEGG TCA cycle	22	0.0840453	0.00242613
3	KEGG Pyruvate metabolism ( Pyruvate metabolism )	22	0.0840453	0.00242613
3	KEGG Purine ribonucleoside monophosphate biosynthesis	22	0.0840453	0.00242613
3	KEGG malate-aspartate shuttle	22	0.0840453	0.00242613
4	pid WNT mediated activation of DVL	50	0.0847066	0.00242613
4	HumanCyc Aminoacyl-tRNA biosynthesis	50	0.0847066	0.00242613
10	Reactome Synthesis of PIPs at the plasma membrane	280	0.0853421	0.00242613
5	Reactome icosapentaenoate biosynthesis II (metazoa)	83	0.0853583	0.00242613
6	Reactome Tie2 Signaling	119	0.0855653	0.00242613
6	Reactome SOS-mediated signalling	119	0.0855653	0.00242613
6	Reactome SHC-mediated cascade:FGFR4	119	0.0855653	0.00242613
6	Reactome SHC-mediated cascade:FGFR3	119	0.0855653	0.00242613
6	Reactome SHC-mediated cascade:FGFR2	119	0.0855653	0.00242613
6	Reactome SHC-mediated cascade:FGFR1	119	0.0855653	0.00242613
6	Reactome SHC1 events in ERBB4 signaling	119	0.0855653	0.00242613
6	Reactome SHC1 events in ERBB2 signaling	119	0.0855653	0.00242613
6	Reactome SHC1 events in EGFR signaling	119	0.0855653	0.00242613
6	Reactome GRB2 events in ERBB2 signaling	119	0.0855653	0.00242613
6	Reactome GRB2 events in EGFR signaling	119	0.0855653	0.00242613
6	Reactome FRS-mediated FGFR4 signaling	119	0.0855653	0.00242613
6	Reactome FRS-mediated FGFR3 signaling	119	0.0855653	0.00242613
6	Reactome FRS-mediated FGFR2 signaling	119	0.0855653	0.00242613
6	Reactome FRS-mediated FGFR1 signaling	119	0.0855653	0.00242613
6	Reactome Endothelins	119	0.0855653	0.00242613
6	pid Signaling by SCF-KIT	119	0.0855653	0.00242613
6	SMPDB Xanthinuria type II	120	0.0871416	0.00242613
6	SMPDB Xanthinuria type I	120	0.0871416	0.00242613
6	SMPDB Xanthine Dehydrogenase Deficiency (Xanthinuria)	120	0.0871416	0.00242613
6	SMPDB Purine Nucleoside Phosphorylase Deficiency	120	0.0871416	0.00242613
6	SMPDB Purine Metabolism	120	0.0871416	0.00242613
6	SMPDB Myoadenylate deaminase deficiency	120	0.0871416	0.00242613
6	SMPDB Molybdenum Cofactor Deficiency	120	0.0871416	0.00242613
6	SMPDB Mitochondrial DNA depletion syndrome	120	0.0871416	0.00242613
6	SMPDB Lesch-Nyhan Syndrome (LNS)	120	0.0871416	0.00242613
6	SMPDB Gout or Kelley-Seegmiller Syndrome	120	0.0871416	0.00242613
6	SMPDB AICA-Ribosiduria	120	0.0871416	0.00242613
6	SMPDB Adenylosuccinate Lyase Deficiency	120	0.0871416	0.00242613
6	SMPDB Adenosine Deaminase Deficiency	120	0.0871416	0.00242613
6	SMPDB Adenine phosphoribosyltransferase deficiency (APRT)	120	0.0871416	0.00242613
5	Reactome Regulation of TP53 Activity through Phosphorylation	84	0.0874271	0.00242613
4	Reactome Pyruvate Metabolism	51	0.0876867	0.00242613
4	Reactome Pyruvate kinase deficiency	51	0.0876867	0.00242613
4	Reactome Pyruvate Dehydrogenase Complex Deficiency	51	0.0876867	0.00242613
4	Reactome Pyruvate Decarboxylase E1 Component Deficiency (PDHE1 Deficiency)	51	0.0876867	0.00242613
4	Reactome Primary hyperoxaluria II, PH2	51	0.0876867	0.00242613
4	Reactome Leigh Syndrome	51	0.0876867	0.00242613
4	HPRD IL2	51	0.0876867	0.00242613
8	KEGG Folate biosynthesis	199	0.087792	0.00242613
6	Reactome Signalling to RAS	121	0.0887175	0.00242613
3	SMPDB Phenylacetate Metabolism	23	0.0893128	0.00242613
3	Reactome ATP + L-Glutamic acid + NH3 = ADP + L-Glutamine + Orthophosphate ( Glutamic acid and Glutamine metabolism )	23	0.0893128	0.00242613
3	Reactome ATP + L-Glutamic acid + NH3 = ADP + L-Glutamine + Orthophosphate ( Arginine and Proline metabolism )	23	0.0893128	0.00242613
3	Reactome Activated NOTCH1 Transmits Signal to the Nucleus	23	0.0893128	0.00242613
3	pid Signaling events mediated by the Hedgehog family	23	0.0893128	0.00242613
3	pid Oxidative Stress Induced Senescence	23	0.0893128	0.00242613
3	KEGG asparagine degradation	23	0.0893128	0.00242613
3	INOH Tyrosinemia Type 3 (TYRO3)	23	0.0893128	0.00242613
3	INOH Tyrosinemia Type 2 (or Richner-Hanhart syndrome)	23	0.0893128	0.00242613
3	INOH Synthesis of UDP-N-acetyl-glucosamine	23	0.0893128	0.00242613
3	INOH Succinyl-CoA + Acetoacetic acid = Succinic acid + Acetoacetyl-CoA ( Valine,Leucine and Isoleucine degradation )	23	0.0893128	0.00242613
3	INOH Succinyl-CoA + Acetoacetic acid = Succinic acid + Acetoacetyl-CoA ( Butanoate metabolism )	23	0.0893128	0.00242613
3	INOH Phenylketonuria	23	0.0893128	0.00242613
3	INOH Phenylalanine and Tyrosine Metabolism	23	0.0893128	0.00242613
3	INOH Astrocytic Glutamate-Glutamine Uptake And Metabolism	23	0.0893128	0.00242613
5	SMPDB Glutaric Aciduria Type I	85	0.089498	0.00242613
6	Reactome SHC-related events triggered by IGF1R	122	0.0902925	0.00242613
6	Reactome RAF/MAP kinase cascade	122	0.0902925	0.00242613
6	Reactome Insulin receptor signalling cascade	122	0.0902925	0.00242613
6	pid Cellular roles of Anthrax toxin	122	0.0902925	0.00242613
9	Reactome Stimuli-sensing channels	480	0.0904984	0.00242613
4	pid Regulation of retinoblastoma protein	52	0.0906746	0.00242613
4	HumanCyc Purine ribonucleoside monophosphate biosynthesis	52	0.0906746	0.00242613
9	KEGG Galactose metabolism	244	0.0908607	0.00242613
5	Reactome Hedgehog 'off' state	86	0.09157	0.00242613
5	pid C-MYB transcription factor network	86	0.09157	0.00242613
5	PANTHER Antigen activates B Cell Receptor (BCR) leading to generation of second messengers	86	0.09157	0.00242613
5	HumanCyc Alanine, aspartate and glutamate metabolism	86	0.09157	0.00242613
5	Reactome stearate biosynthesis	87	0.0936421	0.00242613
4	Reactome XBP1(S) activates chaperone genes	53	0.0936678	0.00242613
4	Reactome Thioguanine Action Pathway	53	0.0936678	0.00242613
4	Reactome Pyrimidine biosynthesis	53	0.0936678	0.00242613
4	Reactome Mercaptopurine Action Pathway	53	0.0936678	0.00242613
4	Reactome Histidine catabolism	53	0.0936678	0.00242613
4	Reactome Constitutive Signaling by AKT1 E17K in Cancer	53	0.0936678	0.00242613
4	Reactome Azathioprine Action Pathway	53	0.0936678	0.00242613
4	pid NCAM signaling for neurite out-growth	53	0.0936678	0.00242613
4	KEGG UDP-N-acetyl-D-galactosamine biosynthesis II	53	0.0936678	0.00242613
4	INOH Valine,Leucine and Isoleucine degradation ( Valine,Leucine and Isoleucine degradation )	53	0.0936678	0.00242613
3	SMPDB UDP-N-acetyl-D-galactosamine biosynthesis II	24	0.0945939	0.00242613
3	SMPDB Lysine catabolism	24	0.0945939	0.00242613
3	Reactome Presenilin action in Notch and Wnt signaling	24	0.0945939	0.00242613
3	Reactome Activation of gene expression by SREBF (SREBP)	24	0.0945939	0.00242613
3	pid Constitutive Signaling by NOTCH1 PEST Domain Mutants	24	0.0945939	0.00242613
3	pid Constitutive Signaling by NOTCH1 HD+PEST Domain Mutants	24	0.0945939	0.00242613
5	pid Ceramide signaling pathway	88	0.0957131	0.00242613
5	INOH Glycine and Serine metabolism ( Glycine and Serine metabolism )	88	0.0957131	0.00242613
9	KEGG Citrate cycle (TCA cycle)	250	0.0960454	0.00242613
4	SMPDB Propanoate metabolism	54	0.0966638	0.00242613
4	Reactome Fatty acid degradation	54	0.0966638	0.00242613
4	HPRD IL3	54	0.0966638	0.00242613
5	KEGG valine degradation	89	0.0977821	0.00242613
5	HumanCyc Fatty Acyl-CoA Biosynthesis	89	0.0977821	0.00242613
4	SMPDB Tay-Sachs Disease	55	0.09966	0.00242613
4	SMPDB Sialuria or French Type Sialuria	55	0.09966	0.00242613
4	SMPDB Salla Disease/Infantile Sialic Acid Storage Disease	55	0.09966	0.00242613
4	SMPDB G(M2)-Gangliosidosis: Variant B, Tay-sachs disease	55	0.09966	0.00242613
4	SMPDB Amino Sugar Metabolism	55	0.09966	0.00242613
4	HumanCyc Xanthinuria type II	55	0.09966	0.00242613
4	HumanCyc Xanthinuria type I	55	0.09966	0.00242613
4	HumanCyc Xanthine Dehydrogenase Deficiency (Xanthinuria)	55	0.09966	0.00242613
4	HumanCyc Purine Nucleoside Phosphorylase Deficiency	55	0.09966	0.00242613
4	HumanCyc Purine Metabolism	55	0.09966	0.00242613
4	HumanCyc Myoadenylate deaminase deficiency	55	0.09966	0.00242613
4	HumanCyc Molybdenum Cofactor Deficiency	55	0.09966	0.00242613
4	HumanCyc Mitochondrial DNA depletion syndrome	55	0.09966	0.00242613
4	HumanCyc Lesch-Nyhan Syndrome (LNS)	55	0.09966	0.00242613
4	HumanCyc Gout or Kelley-Seegmiller Syndrome	55	0.09966	0.00242613
4	HumanCyc AICA-Ribosiduria	55	0.09966	0.00242613
4	HumanCyc Adenylosuccinate Lyase Deficiency	55	0.09966	0.00242613
4	HumanCyc Adenosine Deaminase Deficiency	55	0.09966	0.00242613
4	HumanCyc Adenine phosphoribosyltransferase deficiency (APRT)	55	0.09966	0.00242613
5	pid FCERI mediated MAPK activation	90	0.099848	0.00242613
3	SMPDB Purine ribonucleoside monophosphate biosynthesis	25	0.0998791	0.00242613
3	SMPDB Aminoacyl-tRNA biosynthesis	25	0.0998791	0.00242613
3	Reactome Arf1 pathway	25	0.0998791	0.00242613
3	Reactome Alanine,Aspartic acid and Asparagine metabolism ( Alanine,Aspartic acid and Asparagine metabolism )	25	0.0998791	0.00242613
3	PANTHER BCR	25	0.0998791	0.00242613
3	INOH Fructose and mannose metabolism	25	0.0998791	0.00242613
3	HumanCyc Methotrexate Action Pathway	25	0.0998791	0.00242613
3	HumanCyc Folate Metabolism	25	0.0998791	0.00242613
3	HumanCyc Folate malabsorption, hereditary	25	0.0998791	0.00242613
9	KEGG Sphingolipid metabolism	255	0.100247	0.00242613
14	Reactome Ion transport by P-type ATPases	499	0.101427	0.00242613
5	Reactome Plasma membrane estrogen receptor signaling	91	0.10191	0.00242613
5	Reactome -oxidation (peroxisome)	91	0.10191	0.00242613
5	Reactome fatty acid &beta	91	0.10191	0.00242613
8	PANTHER Heterotrimeric G-protein signaling pathway-Gq alpha and Go alpha mediated pathway	213	0.102097	0.00242613
2	TRANSFAC TRAF6 mediated IRF7 activation	4	0.102257	0.00242613
2	TRANSFAC Factors involved in megakaryocyte development and platelet production	4	0.102257	0.00242613
2	SMPDB 2-oxoglutarate decarboxylation to succinyl-CoA	4	0.102257	0.00242613
2	PhosphoSite Tretinoin promotes the reaction [CPG-oligonucleotide results in increased phosphorylation of RB1 protein]	4	0.102257	0.00242613
2	PhosphoSite Tetrachlorodibenzodioxin inhibits the reaction [Estradiol results in increased phosphorylation of RB1 protein]	4	0.102257	0.00242613
2	PhosphoSite Tetrachlorodibenzodioxin inhibits the reaction [[AHR protein binds to CDK4 protein, CCND1 protein] results in increased phosphorylation of RB1 protein]	4	0.102257	0.00242613
2	PhosphoSite temsirolimus promotes the reaction [2-(4-hydroxyphenyl)-3-methyl-1-(4-(2-piperidin-1-yl-ethoxy)-benzyl)-1H-indol-5-ol results in decreased phosphorylation of RB1 protein]	4	0.102257	0.00242613
2	PhosphoSite sirtinol promotes the reaction [cudraflavone B results in decreased phosphorylation of RB1 protein]	4	0.102257	0.00242613
2	PhosphoSite [Sirolimus co-treated with 2-(4-morpholinyl)-8-phenyl-4H-1-benzopyran-4-one] inhibits the reaction [IL2 protein results in increased phosphorylation of RB1 protein]	4	0.102257	0.00242613
2	PhosphoSite SB 203580 inhibits the reaction [FGF2 protein results in increased phosphorylation of RB1 protein]	4	0.102257	0.00242613
2	PhosphoSite RB1 protein affects the reaction [palbociclib results in decreased phosphorylation of RB1 protein]	4	0.102257	0.00242613
2	PhosphoSite Pertussis Toxin inhibits the reaction [bisphenol A results in increased phosphorylation of RB1 protein]	4	0.102257	0.00242613
2	PhosphoSite palbociclib inhibits the reaction [[CDK6 protein binds to CCND3 protein] results in increased phosphorylation of RB1 protein]	4	0.102257	0.00242613
2	PhosphoSite NOTCH1 protein inhibits the reaction [MRK 003 results in decreased phosphorylation of RB1 protein]	4	0.102257	0.00242613
2	PhosphoSite lycopene inhibits the reaction [Genistein results in increased phosphorylation of RB1 protein]	4	0.102257	0.00242613
2	PhosphoSite JUN protein promotes the reaction [sodium arsenite results in increased phosphorylation of RB1 protein]	4	0.102257	0.00242613
2	PhosphoSite Glutathione inhibits the reaction [Doxorubicin results in decreased phosphorylation of RB1 protein]	4	0.102257	0.00242613
2	PhosphoSite Dexamethasone inhibits the reaction [CDK2 protein results in increased phosphorylation of RB1 protein]	4	0.102257	0.00242613
2	PhosphoSite CVT 313 inhibits the reaction [IGF1 protein results in increased phosphorylation of RB1 protein]	4	0.102257	0.00242613
2	PhosphoSite CSF1R promotes the reaction [Tretinoin results in decreased phosphorylation of RB1 protein]	4	0.102257	0.00242613
2	PhosphoSite CSF1R promotes the reaction [Calcitriol results in decreased phosphorylation of RB1 protein]	4	0.102257	0.00242613
2	PhosphoSite [Colforsin co-treated with Theophylline] inhibits the reaction [Etoposide results in decreased phosphorylation of RB1 protein]	4	0.102257	0.00242613
2	PhosphoSite calyculin A inhibits the reaction [Hydrogen Peroxide results in decreased phosphorylation of RB1 protein]	4	0.102257	0.00242613
2	PhosphoSite alpha-naphthoflavone inhibits the reaction [Tetrachlorodibenzodioxin results in decreased phosphorylation of RB1 protein]	4	0.102257	0.00242613
2	PhosphoSite AHR protein affects the reaction [baicalein results in decreased phosphorylation of RB1 protein]	4	0.102257	0.00242613
2	PhosphoSite (5-fluoro-2-methyl-1-(4-pyridyl)methylene-3-(N-benzyl)-indene)-acetamide hydrochloride promotes the reaction [3,7,11,15-tetramethyl-2,4,6,10,14-hexadecapentaenoic acid results in decreased phosphorylation of RB1 protein]	4	0.102257	0.00242613
2	PhosphoSite 4-(5-(4-chlorophenyl)-3-(trifluoromethyl)-1H-pyrazol-1-yl)benzenesulfonamide inhibits the reaction [Nicotine results in increased phosphorylation of RB1 protein]	4	0.102257	0.00242613
2	PhosphoSite 4-(5-(4-chlorophenyl)-3-(trifluoromethyl)-1H-pyrazol-1-yl)benzenesulfonamide inhibits the reaction [4-(N-methyl-N-nitrosamino)-1-(3-pyridyl)-1-butanone results in increased phosphorylation of RB1 protein]	4	0.102257	0.00242613
2	PhosphoSite 4-(2-(5,6,7,8-tetrahydro-5,5,8,8-tetramethyl-2-naphthalenyl)-1-propenyl)benzoic acid promotes the reaction [Tetradecanoylphorbol Acetate results in increased phosphorylation of RB1 protein]	4	0.102257	0.00242613
2	PhosphoSite 2-(2-amino-3-methoxyphenyl)-4H-1-benzopyran-4-one inhibits the reaction [TNF protein results in increased phosphorylation of RB1 protein]	4	0.102257	0.00242613
2	PhosphoSite 2-(2-amino-3-methoxyphenyl)-4H-1-benzopyran-4-one inhibits the reaction [Tamoxifen results in decreased phosphorylation of RB1 protein]	4	0.102257	0.00242613
2	PhosphoSite 2-(2-amino-3-methoxyphenyl)-4H-1-benzopyran-4-one inhibits the reaction [Paclitaxel results in increased phosphorylation of RB1 protein]	4	0.102257	0.00242613
2	INOH Constitutive Signaling by NOTCH1 PEST Domain Mutants	4	0.102257	0.00242613
2	INOH Constitutive Signaling by NOTCH1 HD+PEST Domain Mutants	4	0.102257	0.00242613
2	INOH Activated NOTCH1 Transmits Signal to the Nucleus	4	0.102257	0.00242613
2	HumanCyc Gemcitabine Metabolism Pathway	4	0.102257	0.00242613
2	HumanCyc Gemcitabine Action Pathway	4	0.102257	0.00242613
4	SMPDB Ion homeostasis	56	0.102654	0.00242613
4	Reactome Glycosphingolipid metabolism	56	0.102654	0.00242613
4	Reactome Alanine, aspartate and glutamate metabolism	56	0.102654	0.00242613
4	pid Regulation of actin dynamics for phagocytic cup formation	56	0.102654	0.00242613
7	Reactome VEGFR2 mediated vascular permeability	171	0.102895	0.00242613
7	Reactome Phase 1 - inactivation of fast Na+ channels	171	0.102895	0.00242613
5	Reactome -oxidation	92	0.103967	0.00242613
5	Reactome IL8- and CXCR2-mediated signaling events	92	0.103967	0.00242613
5	Reactome IL8- and CXCR1-mediated signaling events	92	0.103967	0.00242613
5	pid p75(NTR)-mediated signaling	92	0.103967	0.00242613
5	INOH Glycine, serine and threonine metabolism	92	0.103967	0.00242613
3	Reactome PI3 kinase pathway	26	0.105159	0.00242613
3	Reactome Passive transport by Aquaporins	26	0.105159	0.00242613
3	Reactome Glycine and Serine metabolism ( Glycine and Serine metabolism )	26	0.105159	0.00242613
3	Reactome AKT phosphorylates targets in the nucleus	26	0.105159	0.00242613
3	PANTHER Trk receptor signaling mediated by the MAPK pathway	26	0.105159	0.00242613
3	KEGG Saccharopinuria/Hyperlysinemia II	26	0.105159	0.00242613
3	KEGG Pyridoxine dependency with seizures	26	0.105159	0.00242613
3	KEGG Lysine Degradation	26	0.105159	0.00242613
3	KEGG Hyperlysinemia II or Saccharopinuria	26	0.105159	0.00242613
3	KEGG Hyperlysinemia I, Familial	26	0.105159	0.00242613
3	KEGG 2-aminoadipic 2-oxoadipic aciduria	26	0.105159	0.00242613
3	IntAct IL2	26	0.105159	0.00242613
3	INOH Lysine catabolism	26	0.105159	0.00242613
3	HPRD ID	26	0.105159	0.00242613
4	SMPDB Amino acid synthesis and interconversion (transamination)	57	0.105644	0.00242613
4	Reactome Retrograde transport at the Trans-Golgi-Network	57	0.105644	0.00242613
14	Reactome Sodium/Calcium exchangers	519	0.106844	0.00242613
14	Reactome Ion homeostasis	520	0.107067	0.00242613
5	Reactome Synthesis of IP2, IP, and Ins in the cytosol	94	0.108061	0.00242613
4	SMPDB Valine, leucine and isoleucine degradation	58	0.108627	0.00242613
4	SMPDB Cystinosis, ocular nonnephropathic	58	0.108627	0.00242613
4	SMPDB Cysteine Metabolism	58	0.108627	0.00242613
4	SMPDB Beta-mercaptolactate-cysteine disulfiduria	58	0.108627	0.00242613
4	pid Signaling events mediated by HDAC Class I	58	0.108627	0.00242613
4	pid ATF-2 transcription factor network	58	0.108627	0.00242613
4	INOH Xanthinuria type II	58	0.108627	0.00242613
4	INOH Xanthinuria type I	58	0.108627	0.00242613
4	INOH Xanthine Dehydrogenase Deficiency (Xanthinuria)	58	0.108627	0.00242613
4	INOH Thioguanine Action Pathway	58	0.108627	0.00242613
4	INOH Purine Nucleoside Phosphorylase Deficiency	58	0.108627	0.00242613
4	INOH Purine Metabolism	58	0.108627	0.00242613
4	INOH Myoadenylate deaminase deficiency	58	0.108627	0.00242613
4	INOH Molybdenum Cofactor Deficiency	58	0.108627	0.00242613
4	INOH Mitochondrial DNA depletion syndrome	58	0.108627	0.00242613
4	INOH Mercaptopurine Action Pathway	58	0.108627	0.00242613
4	INOH Lesch-Nyhan Syndrome (LNS)	58	0.108627	0.00242613
4	INOH Gout or Kelley-Seegmiller Syndrome	58	0.108627	0.00242613
4	INOH Azathioprine Action Pathway	58	0.108627	0.00242613
4	INOH AICA-Ribosiduria	58	0.108627	0.00242613
4	INOH Adenylosuccinate Lyase Deficiency	58	0.108627	0.00242613
4	INOH Adenosine Deaminase Deficiency	58	0.108627	0.00242613
4	INOH Adenine phosphoribosyltransferase deficiency (APRT)	58	0.108627	0.00242613
6	HumanCyc Glycolysis / Gluconeogenesis	134	0.108914	0.00242613
6	HumanCyc Amino sugar and nucleotide sugar metabolism	134	0.108914	0.00242613
5	Reactome Anchoring of the basal body to the plasma membrane	95	0.110096	0.00242613
3	SMPDB Alanine,Aspartic acid and Asparagine metabolism ( Alanine,Aspartic acid and Asparagine metabolism )	27	0.110425	0.00242613
3	SMPDB 2-Oxo-glutaric acid + L-Cysteine-sulfinic acid = L-Glutamic acid + 3-Sulfinyl-pyruvic acid ( Methionine and Cysteine metabolism )	27	0.110425	0.00242613
3	Reactome Glycogenosis, Type VII. Tarui disease	27	0.110425	0.00242613
3	Reactome Fanconi-bickel syndrome	27	0.110425	0.00242613
3	Reactome Disassembly of the destruction complex and recruitment of AXIN to the membrane	27	0.110425	0.00242613
3	PANTHER Histamine H1 receptor mediated signaling pathway	27	0.110425	0.00242613
3	INOH Tay-Sachs Disease	27	0.110425	0.00242613
3	INOH Sialuria or French Type Sialuria	27	0.110425	0.00242613
3	INOH Salla Disease/Infantile Sialic Acid Storage Disease	27	0.110425	0.00242613
3	INOH G(M2)-Gangliosidosis: Variant B, Tay-sachs disease	27	0.110425	0.00242613
3	INOH BCR	27	0.110425	0.00242613
3	INOH Amino Sugar Metabolism	27	0.110425	0.00242613
3	HumanCyc Purine salvage	27	0.110425	0.00242613
3	HumanCyc Lysine degradation	27	0.110425	0.00242613
3	HumanCyc Alanine,Aspartic acid and Asparagine metabolism ( Alanine,Aspartic acid and Asparagine metabolism )	27	0.110425	0.00242613
4	Reactome Verapamil Action Pathway	59	0.111601	0.00242613
4	Reactome Tocainide Action Pathway	59	0.111601	0.00242613
4	Reactome Timolol Action Pathway	59	0.111601	0.00242613
4	Reactome superpathway of purine nucleotide salvage	59	0.111601	0.00242613
4	Reactome Sotalol Action Pathway	59	0.111601	0.00242613
4	Reactome Quinidine Action Pathway	59	0.111601	0.00242613
4	Reactome Propranolol Action Pathway	59	0.111601	0.00242613
4	Reactome Procainamide (Antiarrhythmic) Action Pathway	59	0.111601	0.00242613
4	Reactome Practolol Action Pathway	59	0.111601	0.00242613
4	Reactome Pindolol Action Pathway	59	0.111601	0.00242613
4	Reactome Phenytoin (Antiarrhythmic) Action Pathway	59	0.111601	0.00242613
4	Reactome Penbutolol Action Pathway	59	0.111601	0.00242613
4	Reactome Oxprenolol Action Pathway	59	0.111601	0.00242613
4	Reactome Nitrendipine Action Pathway	59	0.111601	0.00242613
4	Reactome Nisoldipine Action Pathway	59	0.111601	0.00242613
4	Reactome Nimodipine Action Pathway	59	0.111601	0.00242613
4	Reactome Nifedipine Action Pathway	59	0.111601	0.00242613
4	Reactome Nebivolol Action Pathway	59	0.111601	0.00242613
4	Reactome Nadolol Action Pathway	59	0.111601	0.00242613
4	Reactome Muscle/Heart Contraction	59	0.111601	0.00242613
4	Reactome Mexiletine Action Pathway	59	0.111601	0.00242613
4	Reactome Metoprolol Action Pathway	59	0.111601	0.00242613
4	Reactome Metipranolol Action Pathway	59	0.111601	0.00242613
4	Reactome Lidocaine (Antiarrhythmic) Action Pathway	59	0.111601	0.00242613
4	Reactome Levobunolol Action Pathway	59	0.111601	0.00242613
4	Reactome Labetalol Action Pathway	59	0.111601	0.00242613
4	Reactome Isradipine Action Pathway	59	0.111601	0.00242613
4	Reactome Isoprenaline Action Pathway	59	0.111601	0.00242613
4	Reactome Ibutilide Action Pathway	59	0.111601	0.00242613
4	Reactome Fosphenytoin (Antiarrhythmic) Action Pathway	59	0.111601	0.00242613
4	Reactome Flecainide Action Pathway	59	0.111601	0.00242613
4	Reactome Felodipine Action Pathway	59	0.111601	0.00242613
4	Reactome Esmolol Action Pathway	59	0.111601	0.00242613
4	Reactome Epinephrine Action Pathway	59	0.111601	0.00242613
4	Reactome Dobutamine Action Pathway	59	0.111601	0.00242613
4	Reactome Disopyramide Action Pathway	59	0.111601	0.00242613
4	Reactome Diltiazem Action Pathway	59	0.111601	0.00242613
4	Reactome Carvedilol Action Pathway	59	0.111601	0.00242613
4	Reactome Carteolol Action Pathway	59	0.111601	0.00242613
4	Reactome Bupranolol Action Pathway	59	0.111601	0.00242613
4	Reactome Bopindolol Action Pathway	59	0.111601	0.00242613
4	Reactome Bisoprolol Action Pathway	59	0.111601	0.00242613
4	Reactome Bevantolol Action Pathway	59	0.111601	0.00242613
4	Reactome Betaxolol Action Pathway	59	0.111601	0.00242613
4	Reactome Atenolol Action Pathway	59	0.111601	0.00242613
4	Reactome Arbutamine Action Pathway	59	0.111601	0.00242613
4	Reactome Amlodipine Action Pathway	59	0.111601	0.00242613
4	Reactome Amiodarone Action Pathway	59	0.111601	0.00242613
4	Reactome Alprenolol Action Pathway	59	0.111601	0.00242613
4	Reactome Acebutolol Action Pathway	59	0.111601	0.00242613
4	NetPath IL4	59	0.111601	0.00242613
7	Reactome ABC-family proteins mediated transport	179	0.112401	0.00242613
7	INOH Purine nucleotides and Nucleosides metabolism ( Purine nucleotides and Nucleosides metabolism )	180	0.113555	0.00242613
4	INOH Valine, leucine and isoleucine degradation	60	0.114564	0.00242613
4	INOH L-Glutamine + H2O = L-Glutamic acid + NH3 ( Glutamic acid and Glutamine metabolism )	60	0.114564	0.00242613
4	INOH ATP + L-Glutamic acid + NH3 = ADP + L-Glutamine + Orthophosphate ( Glutamic acid and Glutamine metabolism )	60	0.114564	0.00242613
4	INOH ATP + L-Glutamic acid + NH3 = ADP + L-Glutamine + Orthophosphate ( Arginine and Proline metabolism )	60	0.114564	0.00242613
4	DIP TGF_beta_Receptor	60	0.114564	0.00242613
3	Reactome TCA cycle	28	0.115669	0.00242613
3	Reactome NOTCH1 Intracellular Domain Regulates Transcription	28	0.115669	0.00242613
3	pid Ras signaling in the CD4+ TCR pathway	28	0.115669	0.00242613
3	PANTHER Synthesis of IP3 and IP4 in the cytosol	28	0.115669	0.00242613
3	PANTHER Fatty Acids bound to GPR40 (FFAR1) regulate insulin secretion	28	0.115669	0.00242613
3	HumanCyc Ubiquinone and other terpenoid-quinone biosynthesis	28	0.115669	0.00242613
3	HumanCyc L-cysteine degradation I	28	0.115669	0.00242613
5	pid Signaling events mediated by Stem cell factor receptor (c-Kit)	98	0.116145	0.00242613
6	SMPDB Thioguanine Action Pathway	139	0.116386	0.00242613
6	SMPDB Mercaptopurine Action Pathway	139	0.116386	0.00242613
6	SMPDB Azathioprine Action Pathway	139	0.116386	0.00242613
4	Reactome Purine catabolism	61	0.117513	0.00242613
4	pid EGFR-dependent Endothelin signaling events	61	0.117513	0.00242613
4	INOH Glutamic acid and Glutamine metabolism ( Glutamic acid and Glutamine metabolism )	61	0.117513	0.00242613
6	Reactome FGF signaling pathway	140	0.117851	0.00242613
7	pid Integrins in angiogenesis	184	0.11808	0.00242613
5	pid Downstream TCR signaling	99	0.11814	0.00242613
5	HumanCyc asparagine biosynthesis	99	0.11814	0.00242613
2	Reactome Rev-mediated nuclear export of HIV RNA	5	0.119965	0.00242613
2	Reactome Disinhibition of SNARE formation	5	0.119965	0.00242613
2	pid Activation of SMO	5	0.119965	0.00242613
2	PANTHER Receptor-ligand binding initiates the second proteolytic cleavage of Notch receptor	5	0.119965	0.00242613
2	PANTHER Constitutive Signaling by NOTCH1 PEST Domain Mutants	5	0.119965	0.00242613
2	PANTHER Constitutive Signaling by NOTCH1 HD+PEST Domain Mutants	5	0.119965	0.00242613
2	PANTHER Constitutive Signaling by NOTCH1 HD Domain Mutants	5	0.119965	0.00242613
2	PANTHER Activated NOTCH1 Transmits Signal to the Nucleus	5	0.119965	0.00242613
2	NetPath Cyclin D associated events in G1	5	0.119965	0.00242613
2	KEGG Fructose biosynthesis	5	0.119965	0.00242613
2	INOH Signaling events mediated by the Hedgehog family	5	0.119965	0.00242613
2	CTD TGF_beta_Receptor	5	0.119965	0.00242613
2	CTD resveratrol inhibits the reaction [[Hydrogen Peroxide results in increased activity of ALOX5 protein] results in increased chemical synthesis of Leukotriene B4]	5	0.119965	0.00242613
2	CTD N-(2-(4-bromocinnamylamino)ethyl)-5-isoquinolinesulfonamide inhibits the reaction [[Dinoprostone co-treated with PTGER1 protein] results in increased expression of NR4A2 mRNA]	5	0.119965	0.00242613
2	CTD GPER1 protein affects the reaction [hydroxytamoxifen results in increased expression of NR4A2 mRNA]	5	0.119965	0.00242613
2	CTD 1-(4-(benzothiazol-2-yloxy)benzyl)piperidine-4-carboxylic acid inhibits the reaction [LTA4H protein results in increased chemical synthesis of Leukotriene B4]	5	0.119965	0.00242613
5	pid Signaling by FGFR4 in disease	100	0.120121	0.00242613
5	pid Signaling by FGFR3 point mutants in cancer	100	0.120121	0.00242613
5	pid Signaling by FGFR3 fusions in cancer	100	0.120121	0.00242613
5	pid Signaling by FGFR2 in disease	100	0.120121	0.00242613
5	pid Signaling by FGFR1 in disease	100	0.120121	0.00242613
5	pid Downstream signal transduction	100	0.120121	0.00242613
5	pid Constitutive Signaling by EGFRvIII	100	0.120121	0.00242613
3	Reactome Glutamic acid and Glutamine metabolism ( Glutamic acid and Glutamine metabolism )	29	0.120883	0.00242613
3	Reactome COPI-dependent Golgi-to-ER retrograde traffic	29	0.120883	0.00242613
3	PANTHER PLC-mediated hydrolysis of PIP2	29	0.120883	0.00242613
3	PANTHER G beta:gamma signalling through PLC beta	29	0.120883	0.00242613
3	PANTHER CLEC7A (Dectin-1) signaling	29	0.120883	0.00242613
3	INOH Heme biosynthesis	29	0.120883	0.00242613
3	HumanCyc Phenylalanine, tyrosine and tryptophan biosynthesis	29	0.120883	0.00242613
7	KEGG Glutathione metabolism	187	0.121371	0.00242613
5	Reactome SRP-dependent cotranslational protein targeting to membrane	101	0.12209	0.00242613
5	pid IL1-mediated signaling events	101	0.12209	0.00242613
5	pid Constitutive Signaling by Ligand-Responsive EGFR Cancer Variants	101	0.12209	0.00242613
5	HumanCyc malate-aspartate shuttle	101	0.12209	0.00242613
5	HumanCyc asparagine degradation	101	0.12209	0.00242613
6	PANTHER PDGF signaling pathway	143	0.122179	0.00242613
6	PANTHER Muscarinic acetylcholine receptor 1 and 3 signaling pathway	144	0.123598	0.00242613
6	HumanCyc methionine salvage cycle III	144	0.123598	0.00242613
5	Reactome Nonsense Mediated Decay (NMD) enhanced by the Exon Junction Complex (EJC)	102	0.124044	0.00242613
5	KEGG Valine, leucine and isoleucine biosynthesis	102	0.124044	0.00242613
5	KEGG Terpenoid backbone biosynthesis	102	0.124044	0.00242613
5	KEGG Glyoxylate and dicarboxylate metabolism	102	0.124044	0.00242613
3	Reactome GABA shunt	30	0.126061	0.00242613
3	Reactome cGMP effects	30	0.126061	0.00242613
3	pid IL2 signaling events mediated by STAT5	30	0.126061	0.00242613
3	KEGG Glutaric Aciduria Type I	30	0.126061	0.00242613
3	INOH Cystinosis, ocular nonnephropathic	30	0.126061	0.00242613
3	INOH Cysteine Metabolism	30	0.126061	0.00242613
3	INOH CLEC7A (Dectin-1) signaling	30	0.126061	0.00242613
3	INOH Choloyl-CoA + Taurine = CoA + Taurocholic acid ( Methionine and Cysteine metabolism )	30	0.126061	0.00242613
3	INOH Beta-mercaptolactate-cysteine disulfiduria	30	0.126061	0.00242613
4	Reactome Insulin Pathway	64	0.126262	0.00242613
4	PANTHER Regulation of insulin secretion	64	0.126262	0.00242613
8	Reactome FCERI mediated NF-kB activation	241	0.126876	0.00242613
7	KEGG Inositol phosphate metabolism	193	0.127665	0.00242613
4	Reactome Methylation	65	0.129139	0.00242613
4	Reactome IL2-mediated signaling events	65	0.129139	0.00242613
4	PANTHER Effects of PIP2 hydrolysis	65	0.129139	0.00242613
4	NetPath Alpha6Beta4Integrin	65	0.129139	0.00242613
6	Reactome CD209 (DC-SIGN) signaling	149	0.130497	0.00242613
3	SMPDB malate-aspartate shuttle	31	0.131195	0.00242613
3	SMPDB 2-Oxo-glutaric acid + L-Cysteine = L-Glutamic acid + 3-Mercapto-pyruvic acid ( Methionine and Cysteine metabolism )	31	0.131195	0.00242613
3	SMPDB 2-Oxo-glutaric acid + L-Cysteine = L-Glutamic acid + 3-Mercapto-pyruvic acid ( Glycine and Serine metabolism )	31	0.131195	0.00242613
3	Reactome Translesion Synthesis by POLH	31	0.131195	0.00242613
3	Reactome Reelin signaling pathway	31	0.131195	0.00242613
3	pid Signaling mediated by p38-gamma and p38-delta	31	0.131195	0.00242613
3	pid Effects of PIP2 hydrolysis	31	0.131195	0.00242613
3	PhosphoSite TCR	31	0.131195	0.00242613
3	INOH Succinyl-CoA + Dihydro-lipoamide = CoA + S-Succinyl-dihydro-lipoamide ( Citrate cycle )	31	0.131195	0.00242613
3	HumanCyc Tay-Sachs Disease	31	0.131195	0.00242613
3	HumanCyc Sialuria or French Type Sialuria	31	0.131195	0.00242613
3	HumanCyc Salla Disease/Infantile Sialic Acid Storage Disease	31	0.131195	0.00242613
3	HumanCyc G(M2)-Gangliosidosis: Variant B, Tay-sachs disease	31	0.131195	0.00242613
3	HumanCyc glutamine degradation/glutamate biosynthesis	31	0.131195	0.00242613
3	HumanCyc Amino Sugar Metabolism	31	0.131195	0.00242613
7	pid Angiopoietin receptor Tie2-mediated signaling	197	0.131626	0.00242613
5	Reactome Class I PI3K signaling events	106	0.131703	0.00242613
4	SMPDB Mitochondrial Beta-Oxidation of Medium Chain Saturated Fatty Acids	66	0.131993	0.00242613
4	NetPath Prolactin	66	0.131993	0.00242613
4	HumanCyc GABA shunt	66	0.131993	0.00242613
4	HumanCyc beta-Alanine metabolism	66	0.131993	0.00242613
6	Reactome ErbB1 downstream signaling	151	0.133158	0.00242613
5	SMPDB Sarcosinemia	107	0.133575	0.00242613
5	SMPDB Non Ketotic Hyperglycinemia	107	0.133575	0.00242613
5	SMPDB Hyperglycinemia, non-ketotic	107	0.133575	0.00242613
5	SMPDB Glycine and Serine Metabolism	107	0.133575	0.00242613
5	SMPDB Dimethylglycine Dehydrogenase Deficiency	107	0.133575	0.00242613
5	SMPDB Dihydropyrimidine Dehydrogenase Deficiency (DHPD)	107	0.133575	0.00242613
5	SMPDB 3-Phosphoglycerate dehydrogenase deficiency	107	0.133575	0.00242613
9	Reactome Activation of the phototransduction cascade	309	0.134315	0.00242613
4	SMPDB Hypoacetylaspartia	67	0.134823	0.00242613
4	SMPDB Canavan Disease	67	0.134823	0.00242613
4	SMPDB Aspartate Metabolism	67	0.134823	0.00242613
4	Reactome purine nucleotides de novo biosynthesis	67	0.134823	0.00242613
4	Reactome Fatty Acids bound to GPR40 (FFAR1) regulate insulin secretion	67	0.134823	0.00242613
4	NetPath IL2	67	0.134823	0.00242613
4	HumanCyc Thioguanine Action Pathway	67	0.134823	0.00242613
4	HumanCyc Mercaptopurine Action Pathway	67	0.134823	0.00242613
4	HumanCyc Azathioprine Action Pathway	67	0.134823	0.00242613
5	KEGG &gamma	108	0.135428	0.00242613
3	SMPDB asparagine degradation	32	0.13628	0.00242613
3	Reactome Translesion synthesis by REV1	32	0.13628	0.00242613
3	PANTHER Acetylcholine regulates insulin secretion	32	0.13628	0.00242613
3	KEGG Methotrexate Action Pathway	32	0.13628	0.00242613
3	KEGG Folate Metabolism	32	0.13628	0.00242613
3	KEGG Folate malabsorption, hereditary	32	0.13628	0.00242613
3	INOH Citrate cycle ( Citrate cycle )	32	0.13628	0.00242613
3	INOH Ca2+ pathway	32	0.13628	0.00242613
3	HumanCyc Hypoacetylaspartia	32	0.13628	0.00242613
3	HumanCyc Canavan Disease	32	0.13628	0.00242613
3	HumanCyc Aspartate Metabolism	32	0.13628	0.00242613
2	Reactome WNT5A-dependent internalization of FZD4	6	0.13683	0.00242613
2	Reactome Tretinoin promotes the reaction [CPG-oligonucleotide results in increased phosphorylation of RB1 protein]	6	0.13683	0.00242613
2	Reactome Tetrachlorodibenzodioxin inhibits the reaction [Estradiol results in increased phosphorylation of RB1 protein]	6	0.13683	0.00242613
2	Reactome Tetrachlorodibenzodioxin inhibits the reaction [[AHR protein binds to CDK4 protein, CCND1 protein] results in increased phosphorylation of RB1 protein]	6	0.13683	0.00242613
2	Reactome temsirolimus promotes the reaction [2-(4-hydroxyphenyl)-3-methyl-1-(4-(2-piperidin-1-yl-ethoxy)-benzyl)-1H-indol-5-ol results in decreased phosphorylation of RB1 protein]	6	0.13683	0.00242613
2	Reactome sirtinol promotes the reaction [cudraflavone B results in decreased phosphorylation of RB1 protein]	6	0.13683	0.00242613
2	Reactome [Sirolimus co-treated with 2-(4-morpholinyl)-8-phenyl-4H-1-benzopyran-4-one] inhibits the reaction [IL2 protein results in increased phosphorylation of RB1 protein]	6	0.13683	0.00242613
2	Reactome SB 203580 inhibits the reaction [FGF2 protein results in increased phosphorylation of RB1 protein]	6	0.13683	0.00242613
2	Reactome Release of Hh-Np from the secreting cell	6	0.13683	0.00242613
2	Reactome RB1 protein affects the reaction [palbociclib results in decreased phosphorylation of RB1 protein]	6	0.13683	0.00242613
2	Reactome Pertussis Toxin inhibits the reaction [bisphenol A results in increased phosphorylation of RB1 protein]	6	0.13683	0.00242613
2	Reactome palbociclib inhibits the reaction [[CDK6 protein binds to CCND3 protein] results in increased phosphorylation of RB1 protein]	6	0.13683	0.00242613
2	Reactome NOTCH1 protein inhibits the reaction [MRK 003 results in decreased phosphorylation of RB1 protein]	6	0.13683	0.00242613
2	Reactome lycopene inhibits the reaction [Genistein results in increased phosphorylation of RB1 protein]	6	0.13683	0.00242613
2	Reactome JUN protein promotes the reaction [sodium arsenite results in increased phosphorylation of RB1 protein]	6	0.13683	0.00242613
2	Reactome Glutathione inhibits the reaction [Doxorubicin results in decreased phosphorylation of RB1 protein]	6	0.13683	0.00242613
2	Reactome Dexamethasone inhibits the reaction [CDK2 protein results in increased phosphorylation of RB1 protein]	6	0.13683	0.00242613
2	Reactome CVT 313 inhibits the reaction [IGF1 protein results in increased phosphorylation of RB1 protein]	6	0.13683	0.00242613
2	Reactome CSF1R promotes the reaction [Tretinoin results in decreased phosphorylation of RB1 protein]	6	0.13683	0.00242613
2	Reactome CSF1R promotes the reaction [Calcitriol results in decreased phosphorylation of RB1 protein]	6	0.13683	0.00242613
2	Reactome [Colforsin co-treated with Theophylline] inhibits the reaction [Etoposide results in decreased phosphorylation of RB1 protein]	6	0.13683	0.00242613
2	Reactome Class B/2 (Secretin family receptors)	6	0.13683	0.00242613
2	Reactome calyculin A inhibits the reaction [Hydrogen Peroxide results in decreased phosphorylation of RB1 protein]	6	0.13683	0.00242613
2	Reactome alpha-naphthoflavone inhibits the reaction [Tetrachlorodibenzodioxin results in decreased phosphorylation of RB1 protein]	6	0.13683	0.00242613
2	Reactome AHR protein affects the reaction [baicalein results in decreased phosphorylation of RB1 protein]	6	0.13683	0.00242613
2	Reactome (5-fluoro-2-methyl-1-(4-pyridyl)methylene-3-(N-benzyl)-indene)-acetamide hydrochloride promotes the reaction [3,7,11,15-tetramethyl-2,4,6,10,14-hexadecapentaenoic acid results in decreased phosphorylation of RB1 protein]	6	0.13683	0.00242613
2	Reactome 4-(5-(4-chlorophenyl)-3-(trifluoromethyl)-1H-pyrazol-1-yl)benzenesulfonamide inhibits the reaction [Nicotine results in increased phosphorylation of RB1 protein]	6	0.13683	0.00242613
2	Reactome 4-(5-(4-chlorophenyl)-3-(trifluoromethyl)-1H-pyrazol-1-yl)benzenesulfonamide inhibits the reaction [4-(N-methyl-N-nitrosamino)-1-(3-pyridyl)-1-butanone results in increased phosphorylation of RB1 protein]	6	0.13683	0.00242613
2	Reactome 4-(2-(5,6,7,8-tetrahydro-5,5,8,8-tetramethyl-2-naphthalenyl)-1-propenyl)benzoic acid promotes the reaction [Tetradecanoylphorbol Acetate results in increased phosphorylation of RB1 protein]	6	0.13683	0.00242613
2	Reactome 2-(2-amino-3-methoxyphenyl)-4H-1-benzopyran-4-one inhibits the reaction [TNF protein results in increased phosphorylation of RB1 protein]	6	0.13683	0.00242613
2	Reactome 2-(2-amino-3-methoxyphenyl)-4H-1-benzopyran-4-one inhibits the reaction [Tamoxifen results in decreased phosphorylation of RB1 protein]	6	0.13683	0.00242613
2	Reactome 2-(2-amino-3-methoxyphenyl)-4H-1-benzopyran-4-one inhibits the reaction [Paclitaxel results in increased phosphorylation of RB1 protein]	6	0.13683	0.00242613
2	pid Tretinoin promotes the reaction [CPG-oligonucleotide results in increased phosphorylation of RB1 protein]	6	0.13683	0.00242613
2	pid Tetrachlorodibenzodioxin inhibits the reaction [Estradiol results in increased phosphorylation of RB1 protein]	6	0.13683	0.00242613
2	pid Tetrachlorodibenzodioxin inhibits the reaction [[AHR protein binds to CDK4 protein, CCND1 protein] results in increased phosphorylation of RB1 protein]	6	0.13683	0.00242613
2	pid temsirolimus promotes the reaction [2-(4-hydroxyphenyl)-3-methyl-1-(4-(2-piperidin-1-yl-ethoxy)-benzyl)-1H-indol-5-ol results in decreased phosphorylation of RB1 protein]	6	0.13683	0.00242613
2	pid sirtinol promotes the reaction [cudraflavone B results in decreased phosphorylation of RB1 protein]	6	0.13683	0.00242613
2	pid [Sirolimus co-treated with 2-(4-morpholinyl)-8-phenyl-4H-1-benzopyran-4-one] inhibits the reaction [IL2 protein results in increased phosphorylation of RB1 protein]	6	0.13683	0.00242613
2	pid SB 203580 inhibits the reaction [FGF2 protein results in increased phosphorylation of RB1 protein]	6	0.13683	0.00242613
2	pid RB1 protein affects the reaction [palbociclib results in decreased phosphorylation of RB1 protein]	6	0.13683	0.00242613
2	pid Pertussis Toxin inhibits the reaction [bisphenol A results in increased phosphorylation of RB1 protein]	6	0.13683	0.00242613
2	pid palbociclib inhibits the reaction [[CDK6 protein binds to CCND3 protein] results in increased phosphorylation of RB1 protein]	6	0.13683	0.00242613
2	pid NOTCH1 protein inhibits the reaction [MRK 003 results in decreased phosphorylation of RB1 protein]	6	0.13683	0.00242613
2	pid lycopene inhibits the reaction [Genistein results in increased phosphorylation of RB1 protein]	6	0.13683	0.00242613
2	pid JUN protein promotes the reaction [sodium arsenite results in increased phosphorylation of RB1 protein]	6	0.13683	0.00242613
2	pid Hedgehog	6	0.13683	0.00242613
2	pid Glutathione inhibits the reaction [Doxorubicin results in decreased phosphorylation of RB1 protein]	6	0.13683	0.00242613
2	pid Dexamethasone inhibits the reaction [CDK2 protein results in increased phosphorylation of RB1 protein]	6	0.13683	0.00242613
2	pid CVT 313 inhibits the reaction [IGF1 protein results in increased phosphorylation of RB1 protein]	6	0.13683	0.00242613
2	pid CSF1R promotes the reaction [Tretinoin results in decreased phosphorylation of RB1 protein]	6	0.13683	0.00242613
2	pid CSF1R promotes the reaction [Calcitriol results in decreased phosphorylation of RB1 protein]	6	0.13683	0.00242613
2	pid [Colforsin co-treated with Theophylline] inhibits the reaction [Etoposide results in decreased phosphorylation of RB1 protein]	6	0.13683	0.00242613
2	pid calyculin A inhibits the reaction [Hydrogen Peroxide results in decreased phosphorylation of RB1 protein]	6	0.13683	0.00242613
2	pid alpha-naphthoflavone inhibits the reaction [Tetrachlorodibenzodioxin results in decreased phosphorylation of RB1 protein]	6	0.13683	0.00242613
2	pid AHR protein affects the reaction [baicalein results in decreased phosphorylation of RB1 protein]	6	0.13683	0.00242613
2	pid (5-fluoro-2-methyl-1-(4-pyridyl)methylene-3-(N-benzyl)-indene)-acetamide hydrochloride promotes the reaction [3,7,11,15-tetramethyl-2,4,6,10,14-hexadecapentaenoic acid results in decreased phosphorylation of RB1 protein]	6	0.13683	0.00242613
2	pid 4-(5-(4-chlorophenyl)-3-(trifluoromethyl)-1H-pyrazol-1-yl)benzenesulfonamide inhibits the reaction [Nicotine results in increased phosphorylation of RB1 protein]	6	0.13683	0.00242613
2	pid 4-(5-(4-chlorophenyl)-3-(trifluoromethyl)-1H-pyrazol-1-yl)benzenesulfonamide inhibits the reaction [4-(N-methyl-N-nitrosamino)-1-(3-pyridyl)-1-butanone results in increased phosphorylation of RB1 protein]	6	0.13683	0.00242613
2	pid 4-(2-(5,6,7,8-tetrahydro-5,5,8,8-tetramethyl-2-naphthalenyl)-1-propenyl)benzoic acid promotes the reaction [Tetradecanoylphorbol Acetate results in increased phosphorylation of RB1 protein]	6	0.13683	0.00242613
2	pid 2-(2-amino-3-methoxyphenyl)-4H-1-benzopyran-4-one inhibits the reaction [TNF protein results in increased phosphorylation of RB1 protein]	6	0.13683	0.00242613
2	pid 2-(2-amino-3-methoxyphenyl)-4H-1-benzopyran-4-one inhibits the reaction [Tamoxifen results in decreased phosphorylation of RB1 protein]	6	0.13683	0.00242613
2	pid 2-(2-amino-3-methoxyphenyl)-4H-1-benzopyran-4-one inhibits the reaction [Paclitaxel results in increased phosphorylation of RB1 protein]	6	0.13683	0.00242613
2	PhosphoSite Alpha-synuclein signaling	6	0.13683	0.00242613
2	PANTHER Signaling events mediated by the Hedgehog family	6	0.13683	0.00242613
2	NetPath Tretinoin promotes the reaction [CPG-oligonucleotide results in increased phosphorylation of RB1 protein]	6	0.13683	0.00242613
2	NetPath Tetrachlorodibenzodioxin inhibits the reaction [Estradiol results in increased phosphorylation of RB1 protein]	6	0.13683	0.00242613
2	NetPath Tetrachlorodibenzodioxin inhibits the reaction [[AHR protein binds to CDK4 protein, CCND1 protein] results in increased phosphorylation of RB1 protein]	6	0.13683	0.00242613
2	NetPath temsirolimus promotes the reaction [2-(4-hydroxyphenyl)-3-methyl-1-(4-(2-piperidin-1-yl-ethoxy)-benzyl)-1H-indol-5-ol results in decreased phosphorylation of RB1 protein]	6	0.13683	0.00242613
2	NetPath sirtinol promotes the reaction [cudraflavone B results in decreased phosphorylation of RB1 protein]	6	0.13683	0.00242613
2	NetPath [Sirolimus co-treated with 2-(4-morpholinyl)-8-phenyl-4H-1-benzopyran-4-one] inhibits the reaction [IL2 protein results in increased phosphorylation of RB1 protein]	6	0.13683	0.00242613
2	NetPath Signaling events mediated by the Hedgehog family	6	0.13683	0.00242613
2	NetPath SB 203580 inhibits the reaction [FGF2 protein results in increased phosphorylation of RB1 protein]	6	0.13683	0.00242613
2	NetPath RB1 protein affects the reaction [palbociclib results in decreased phosphorylation of RB1 protein]	6	0.13683	0.00242613
2	NetPath Pertussis Toxin inhibits the reaction [bisphenol A results in increased phosphorylation of RB1 protein]	6	0.13683	0.00242613
2	NetPath palbociclib inhibits the reaction [[CDK6 protein binds to CCND3 protein] results in increased phosphorylation of RB1 protein]	6	0.13683	0.00242613
2	NetPath NOTCH1 protein inhibits the reaction [MRK 003 results in decreased phosphorylation of RB1 protein]	6	0.13683	0.00242613
2	NetPath lycopene inhibits the reaction [Genistein results in increased phosphorylation of RB1 protein]	6	0.13683	0.00242613
2	NetPath JUN protein promotes the reaction [sodium arsenite results in increased phosphorylation of RB1 protein]	6	0.13683	0.00242613
2	NetPath Glutathione inhibits the reaction [Doxorubicin results in decreased phosphorylation of RB1 protein]	6	0.13683	0.00242613
2	NetPath Dexamethasone inhibits the reaction [CDK2 protein results in increased phosphorylation of RB1 protein]	6	0.13683	0.00242613
2	NetPath CVT 313 inhibits the reaction [IGF1 protein results in increased phosphorylation of RB1 protein]	6	0.13683	0.00242613
2	NetPath CSF1R promotes the reaction [Tretinoin results in decreased phosphorylation of RB1 protein]	6	0.13683	0.00242613
2	NetPath CSF1R promotes the reaction [Calcitriol results in decreased phosphorylation of RB1 protein]	6	0.13683	0.00242613
2	NetPath [Colforsin co-treated with Theophylline] inhibits the reaction [Etoposide results in decreased phosphorylation of RB1 protein]	6	0.13683	0.00242613
2	NetPath calyculin A inhibits the reaction [Hydrogen Peroxide results in decreased phosphorylation of RB1 protein]	6	0.13683	0.00242613
2	NetPath alpha-naphthoflavone inhibits the reaction [Tetrachlorodibenzodioxin results in decreased phosphorylation of RB1 protein]	6	0.13683	0.00242613
2	NetPath AHR protein affects the reaction [baicalein results in decreased phosphorylation of RB1 protein]	6	0.13683	0.00242613
2	NetPath (5-fluoro-2-methyl-1-(4-pyridyl)methylene-3-(N-benzyl)-indene)-acetamide hydrochloride promotes the reaction [3,7,11,15-tetramethyl-2,4,6,10,14-hexadecapentaenoic acid results in decreased phosphorylation of RB1 protein]	6	0.13683	0.00242613
2	NetPath 4-(5-(4-chlorophenyl)-3-(trifluoromethyl)-1H-pyrazol-1-yl)benzenesulfonamide inhibits the reaction [Nicotine results in increased phosphorylation of RB1 protein]	6	0.13683	0.00242613
2	NetPath 4-(5-(4-chlorophenyl)-3-(trifluoromethyl)-1H-pyrazol-1-yl)benzenesulfonamide inhibits the reaction [4-(N-methyl-N-nitrosamino)-1-(3-pyridyl)-1-butanone results in increased phosphorylation of RB1 protein]	6	0.13683	0.00242613
2	NetPath 4-(2-(5,6,7,8-tetrahydro-5,5,8,8-tetramethyl-2-naphthalenyl)-1-propenyl)benzoic acid promotes the reaction [Tetradecanoylphorbol Acetate results in increased phosphorylation of RB1 protein]	6	0.13683	0.00242613
2	NetPath 2-(2-amino-3-methoxyphenyl)-4H-1-benzopyran-4-one inhibits the reaction [TNF protein results in increased phosphorylation of RB1 protein]	6	0.13683	0.00242613
2	NetPath 2-(2-amino-3-methoxyphenyl)-4H-1-benzopyran-4-one inhibits the reaction [Tamoxifen results in decreased phosphorylation of RB1 protein]	6	0.13683	0.00242613
2	NetPath 2-(2-amino-3-methoxyphenyl)-4H-1-benzopyran-4-one inhibits the reaction [Paclitaxel results in increased phosphorylation of RB1 protein]	6	0.13683	0.00242613
2	KEGG (R)-Methyl-malonyl-CoA = Succinyl-CoA ( Propanoate metabolism )	6	0.13683	0.00242613
2	INOH Receptor-ligand binding initiates the second proteolytic cleavage of Notch receptor	6	0.13683	0.00242613
2	INOH Mammalian Wnt signaling pathway ( Mammalian Wnt signaling pathway Diagram )	6	0.13683	0.00242613
2	HumanCyc CoA + GTP + Succinic acid = Succinyl-CoA + GDP + Orthophosphate ( Citrate cycle )	6	0.13683	0.00242613
2	DIP Prolactin	6	0.13683	0.00242613
2	CTD Regulation of retinoblastoma protein	6	0.13683	0.00242613
2	CTD Cyclin D associated events in G1	6	0.13683	0.00242613
2	CTD BCR	6	0.13683	0.00242613
5	Reactome Netrin-mediated signaling events	109	0.137261	0.00242613
5	HumanCyc urea cycle	109	0.137261	0.00242613
4	SMPDB Malate-Aspartate Shuttle	68	0.137626	0.00242613
4	Reactome PKA activation in glucagon signalling	68	0.137626	0.00242613
4	Reactome PKA activation	68	0.137626	0.00242613
4	Reactome Adenylate cyclase activating pathway	68	0.137626	0.00242613
4	PANTHER VEGFR2 mediated cell proliferation	68	0.137626	0.00242613
4	KEGG Phenylalanine, tyrosine and tryptophan biosynthesis	68	0.137626	0.00242613
7	KEGG Starch and sucrose metabolism	205	0.138929	0.00242613
5	pid IGF1 pathway	110	0.139075	0.00242613
5	Reactome Bicarbonate transporters	258	0.140023	0.00242613
4	Reactome Thromboxane A2 receptor signaling	69	0.140401	0.00242613
4	NetPath IL3	69	0.140401	0.00242613
4	INOH Amino acid synthesis and interconversion (transamination)	69	0.140401	0.00242613
4	HumanCyc Nitrogen metabolism	69	0.140401	0.00242613
5	Reactome Glycerophospholipid biosynthesis	111	0.140868	0.00242613
5	PANTHER Nicotinic acetylcholine receptor signaling pathway	111	0.140868	0.00242613
5	HumanCyc triacylglycerol biosynthesis	111	0.140868	0.00242613
3	SMPDB Gemcitabine Metabolism Pathway	33	0.14131	0.00242613
3	SMPDB Gemcitabine Action Pathway	33	0.14131	0.00242613
3	Reactome Translesion synthesis by POLK	33	0.14131	0.00242613
3	Reactome Translesion synthesis by POLI	33	0.14131	0.00242613
3	Reactome PCNA-Dependent Long Patch Base Excision Repair	33	0.14131	0.00242613
3	pid p38 MAPK signaling pathway	33	0.14131	0.00242613
3	PANTHER G alpha (q) signalling events	33	0.14131	0.00242613
3	KEGG Citric acid cycle (TCA cycle)	33	0.14131	0.00242613
3	INOH Purine ribonucleoside monophosphate biosynthesis	33	0.14131	0.00242613
3	HumanCyc Pyruvate dehydrogenase deficiency (E3)	33	0.14131	0.00242613
3	HumanCyc Pyruvate dehydrogenase deficiency (E2)	33	0.14131	0.00242613
3	HumanCyc Mitochondrial complex II deficiency	33	0.14131	0.00242613
3	HumanCyc Fumarase deficiency	33	0.14131	0.00242613
3	HumanCyc cysteine biosynthesis/homocysteine degradation (trans-sulfuration)	33	0.14131	0.00242613
3	HumanCyc Congenital lactic acidosis	33	0.14131	0.00242613
3	HumanCyc Citric Acid Cycle	33	0.14131	0.00242613
3	HumanCyc 2-ketoglutarate dehydrogenase complex deficiency	33	0.14131	0.00242613
7	KEGG Drug metabolism - other enzymes	323	0.141623	0.00242613
7	Reactome Elevation of cytosolic Ca2+ levels	209	0.14225	0.00242613
4	SMPDB Prolinemia Type II	70	0.143147	0.00242613
4	SMPDB Prolidase Deficiency (PD)	70	0.143147	0.00242613
4	SMPDB Ornithine Aminotransferase Deficiency (OAT Deficiency)	70	0.143147	0.00242613
4	SMPDB L-arginine:glycine amidinotransferase deficiency	70	0.143147	0.00242613
4	SMPDB Hyperprolinemia Type II	70	0.143147	0.00242613
4	SMPDB Hyperprolinemia Type I	70	0.143147	0.00242613
4	SMPDB Hyperornithinemia with gyrate atrophy (HOGA)	70	0.143147	0.00242613
4	SMPDB Hyperornithinemia-hyperammonemia-homocitrullinuria [HHH-syndrome]	70	0.143147	0.00242613
4	SMPDB Guanidinoacetate Methyltransferase Deficiency (GAMT Deficiency)	70	0.143147	0.00242613
4	SMPDB Creatine deficiency, guanidinoacetate methyltransferase deficiency	70	0.143147	0.00242613
4	SMPDB Arginine: Glycine Amidinotransferase Deficiency (AGAT Deficiency)	70	0.143147	0.00242613
4	SMPDB Arginine and Proline Metabolism	70	0.143147	0.00242613
4	Reactome Heterotrimeric G-protein signaling pathway-Gq alpha and Go alpha mediated pathway	70	0.143147	0.00242613
4	CTD [N3-cyclopropyl-7-((4-(1-methylethyl)phenyl)methyl)-7H-pyrrolo(3, 2-f)quinazoline-1,3-diamine binds to F2R protein] promotes the reaction [CGB protein results in increased chemical synthesis of Progesterone]	70	0.143147	0.00242613
4	CTD N-(2-(4-bromocinnamylamino)ethyl)-5-isoquinolinesulfonamide inhibits the reaction [[FSHB protein co-treated with Testosterone] results in increased chemical synthesis of Progesterone]	70	0.143147	0.00242613
4	CTD LEP protein inhibits the reaction [8-Bromo Cyclic Adenosine Monophosphate results in increased chemical synthesis of Progesterone]	70	0.143147	0.00242613
4	CTD GSTA3 protein affects the reaction [Colforsin results in increased chemical synthesis of Progesterone]	70	0.143147	0.00242613
4	CTD [6,7-dimethyl-2-(2E)-3-(1-methyl-2-phenyl-1H-pyrrolo(2,3-b)pyridin-3-yl-prop-2-enoyl)-1,2,3,4-tetrahydroisoquinoline hydrochloride results in decreased activity of SMAD3 protein] inhibits the reaction [FSHB protein results in increased chemical synthesis of Progesterone]	70	0.143147	0.00242613
6	Reactome Glycogen breakdown (glycogenolysis)	160	0.144344	0.00242613
5	HumanCyc Glutathione metabolism	113	0.144389	0.00242613
4	Reactome Recruitment of mitotic centrosome proteins and complexes	71	0.145862	0.00242613
4	INOH Propanoate metabolism	71	0.145862	0.00242613
4	INOH Glycolysis / Gluconeogenesis	71	0.145862	0.00242613
4	INOH ATP + GMP = ADP + GDP ( Purine nucleotides and Nucleosides metabolism )	71	0.145862	0.00242613
5	HumanCyc CDP-diacylglycerol biosynthesis	114	0.146116	0.00242613
3	SMPDB Sperm Motility And Taxes	34	0.146278	0.00242613
3	SMPDB Phase 2 - plateau phase	34	0.146278	0.00242613
3	Reactome Trk receptor signaling mediated by the MAPK pathway	34	0.146278	0.00242613
3	Reactome Respiratory electron transport	34	0.146278	0.00242613
3	Reactome Folate biosynthesis	34	0.146278	0.00242613
3	KEGG ATP + L-Glutamic acid + NH3 = ADP + L-Glutamine + Orthophosphate ( Glutamic acid and Glutamine metabolism )	34	0.146278	0.00242613
3	KEGG ATP + L-Glutamic acid + NH3 = ADP + L-Glutamine + Orthophosphate ( Arginine and Proline metabolism )	34	0.146278	0.00242613
3	INOH Inositol phosphate metabolism	34	0.146278	0.00242613
3	INOH CoA + GTP + Succinic acid = Succinyl-CoA + GDP + Orthophosphate ( Citrate cycle )	34	0.146278	0.00242613
3	INOH CoA + ATP + Succinic acid = Succinyl-CoA + ADP + Orthophosphate ( Citrate cycle )	34	0.146278	0.00242613
3	HumanCyc dolichyl-diphosphooligosaccharide biosynthesis	34	0.146278	0.00242613
5	Reactome Organic anion transporters	115	0.14782	0.00242613
7	HumanCyc purine nucleotides de novo biosynthesis	217	0.148191	0.00242613
4	Reactome Uptake and function of anthrax toxins	72	0.148545	0.00242613
4	Reactome Signaling events mediated by focal adhesion kinase	72	0.148545	0.00242613
4	Reactome Role of second messengers in netrin-1 signaling	72	0.148545	0.00242613
4	Reactome AURKA Activation by TPX2	72	0.148545	0.00242613
4	PANTHER TGF-beta signaling pathway	72	0.148545	0.00242613
6	Reactome PDGFR-beta signaling pathway	164	0.148864	0.00242613
7	KEGG Glycosylphosphatidylinositol(GPI)-anchor biosynthesis	219	0.149525	0.00242613
5	Reactome Rho GTPase cycle	117	0.151157	0.00242613
3	SMPDB Glycine and Serine metabolism ( Glycine and Serine metabolism )	35	0.151181	0.00242613
3	Reactome Transcriptional activation of mitochondrial biogenesis	35	0.151181	0.00242613
3	Reactome Pyruvate Carboxylase Deficiency	35	0.151181	0.00242613
3	Reactome Primary Hyperoxaluria Type I	35	0.151181	0.00242613
3	Reactome Lactic Acidemia	35	0.151181	0.00242613
3	Reactome Alanine Metabolism	35	0.151181	0.00242613
3	NetPath Downstream TCR signaling	35	0.151181	0.00242613
3	NetPath BCR signaling pathway	35	0.151181	0.00242613
3	KEGG Hypoacetylaspartia	35	0.151181	0.00242613
3	KEGG glutamine biosynthesis	35	0.151181	0.00242613
3	KEGG Canavan Disease	35	0.151181	0.00242613
3	KEGG Aspartate Metabolism	35	0.151181	0.00242613
3	INOH Methotrexate Action Pathway	35	0.151181	0.00242613
3	INOH Hedgehog 'off' state	35	0.151181	0.00242613
3	INOH Folate Metabolism	35	0.151181	0.00242613
3	INOH Folate malabsorption, hereditary	35	0.151181	0.00242613
3	INOH Acetyl-CoA + Dihydro-lipoamide = CoA + 6-S-Acetyl-dihydro-lipoamide ( Pyruvate metabolism )	35	0.151181	0.00242613
3	INOH Acetyl-CoA + Dihydro-lipoamide = CoA + 6-S-Acetyl-dihydro-lipoamide ( Butanoate metabolism )	35	0.151181	0.00242613
4	SMPDB Verapamil Action Pathway	73	0.151194	0.00242613
4	SMPDB Tocainide Action Pathway	73	0.151194	0.00242613
4	SMPDB Timolol Action Pathway	73	0.151194	0.00242613
4	SMPDB Sotalol Action Pathway	73	0.151194	0.00242613
4	SMPDB Quinidine Action Pathway	73	0.151194	0.00242613
4	SMPDB Propranolol Action Pathway	73	0.151194	0.00242613
4	SMPDB Procainamide (Antiarrhythmic) Action Pathway	73	0.151194	0.00242613
4	SMPDB Practolol Action Pathway	73	0.151194	0.00242613
4	SMPDB Pindolol Action Pathway	73	0.151194	0.00242613
4	SMPDB Penbutolol Action Pathway	73	0.151194	0.00242613
4	SMPDB Oxprenolol Action Pathway	73	0.151194	0.00242613
4	SMPDB Nitrendipine Action Pathway	73	0.151194	0.00242613
4	SMPDB Nisoldipine Action Pathway	73	0.151194	0.00242613
4	SMPDB Nimodipine Action Pathway	73	0.151194	0.00242613
4	SMPDB Nifedipine Action Pathway	73	0.151194	0.00242613
4	SMPDB Nebivolol Action Pathway	73	0.151194	0.00242613
4	SMPDB Nadolol Action Pathway	73	0.151194	0.00242613
4	SMPDB Muscle/Heart Contraction	73	0.151194	0.00242613
4	SMPDB Mexiletine Action Pathway	73	0.151194	0.00242613
4	SMPDB Metoprolol Action Pathway	73	0.151194	0.00242613
4	SMPDB Metipranolol Action Pathway	73	0.151194	0.00242613
4	SMPDB Lidocaine (Antiarrhythmic) Action Pathway	73	0.151194	0.00242613
4	SMPDB Levobunolol Action Pathway	73	0.151194	0.00242613
4	SMPDB Labetalol Action Pathway	73	0.151194	0.00242613
4	SMPDB Isradipine Action Pathway	73	0.151194	0.00242613
4	SMPDB Isoprenaline Action Pathway	73	0.151194	0.00242613
4	SMPDB Ibutilide Action Pathway	73	0.151194	0.00242613
4	SMPDB Fosphenytoin (Antiarrhythmic) Action Pathway	73	0.151194	0.00242613
4	SMPDB Flecainide Action Pathway	73	0.151194	0.00242613
4	SMPDB Felodipine Action Pathway	73	0.151194	0.00242613
4	SMPDB Esmolol Action Pathway	73	0.151194	0.00242613
4	SMPDB Epinephrine Action Pathway	73	0.151194	0.00242613
4	SMPDB Dobutamine Action Pathway	73	0.151194	0.00242613
4	SMPDB Disopyramide Action Pathway	73	0.151194	0.00242613
4	SMPDB Diltiazem Action Pathway	73	0.151194	0.00242613
4	SMPDB Carvedilol Action Pathway	73	0.151194	0.00242613
4	SMPDB Carteolol Action Pathway	73	0.151194	0.00242613
4	SMPDB Bupranolol Action Pathway	73	0.151194	0.00242613
4	SMPDB Bopindolol Action Pathway	73	0.151194	0.00242613
4	SMPDB Bisoprolol Action Pathway	73	0.151194	0.00242613
4	SMPDB Bevantolol Action Pathway	73	0.151194	0.00242613
4	SMPDB Betaxolol Action Pathway	73	0.151194	0.00242613
4	SMPDB Atenolol Action Pathway	73	0.151194	0.00242613
4	SMPDB Arbutamine Action Pathway	73	0.151194	0.00242613
4	SMPDB Amlodipine Action Pathway	73	0.151194	0.00242613
4	SMPDB Amiodarone Action Pathway	73	0.151194	0.00242613
4	SMPDB Alprenolol Action Pathway	73	0.151194	0.00242613
4	SMPDB Acebutolol Action Pathway	73	0.151194	0.00242613
4	Reactome Osteopontin-mediated events	73	0.151194	0.00242613
4	Reactome Nonhomologous End-Joining (NHEJ)	73	0.151194	0.00242613
4	Reactome -glutamyl cycle	73	0.151194	0.00242613
4	HumanCyc Glutathione synthesis and recycling	73	0.151194	0.00242613
7	HumanCyc superpathway of purine nucleotide salvage	222	0.151411	0.00242613
5	pid EPO signaling pathway	118	0.152789	0.00242613
2	Reactome Validated targets of C-MYC transcriptional repression	7	0.152881	0.00242613
2	Reactome Signaling mediated by p38-gamma and p38-delta	7	0.152881	0.00242613
2	Reactome Signaling by EGFR	7	0.152881	0.00242613
2	Reactome Signal attenuation	7	0.152881	0.00242613
2	Reactome p38 MAPK signaling pathway	7	0.152881	0.00242613
2	Reactome Hedgehog	7	0.152881	0.00242613
2	Reactome Canonical Notch signaling pathway ( Notch signaling pathway Diagram )	7	0.152881	0.00242613
2	pid Hedgehog signaling pathway	7	0.152881	0.00242613
2	PhosphoSite Regulation of retinoblastoma protein	7	0.152881	0.00242613
2	PANTHER One carbon pool by folate	7	0.152881	0.00242613
2	NetPath PDGFR-alpha signaling pathway	7	0.152881	0.00242613
2	NetPath IKK activation signaling (through PKC beta and CARMA1:BCL10:MALT1) ( B cell receptor signaling )	7	0.152881	0.00242613
2	INOH (R)-Methyl-malonyl-CoA = Succinyl-CoA ( Propanoate metabolism )	7	0.152881	0.00242613
2	INOH Hedgehog	7	0.152881	0.00242613
2	INOH activated TAK1 mediates p38 MAPK activation	7	0.152881	0.00242613
2	HumanCyc Succinyl-CoA + Dihydro-lipoamide = CoA + S-Succinyl-dihydro-lipoamide ( Citrate cycle )	7	0.152881	0.00242613
2	HumanCyc Molybdenum cofactor biosynthesis	7	0.152881	0.00242613
2	DIP IL9	7	0.152881	0.00242613
7	KEGG Selenocompound metabolism	225	0.153156	0.00242613
4	Reactome Sema4D induced cell migration and growth-cone collapse	74	0.153808	0.00242613
4	Reactome Purine salvage	74	0.153808	0.00242613
4	PANTHER Metabotropic glutamate receptor group III pathway	74	0.153808	0.00242613
4	NetPath KitReceptor	74	0.153808	0.00242613
2	KEGG Metabolism of xenobiotics by cytochrome P450	130	0.154198	0.00242613
7	KEGG Ether lipid metabolism	227	0.154242	0.00242613
5	PANTHER Thyrotropin-releasing hormone receptor signaling pathway	119	0.154396	0.00242613
7	NetPath EGFR1	230	0.155752	0.00242613
3	SMPDB superpathway of purine nucleotide salvage	36	0.156014	0.00242613
3	Reactome Pyruvate dehydrogenase deficiency (E3)	36	0.156014	0.00242613
3	Reactome Pyruvate dehydrogenase deficiency (E2)	36	0.156014	0.00242613
3	Reactome Mitochondrial complex II deficiency	36	0.156014	0.00242613
3	Reactome Fumarase deficiency	36	0.156014	0.00242613
3	Reactome Congenital lactic acidosis	36	0.156014	0.00242613
3	Reactome Citric Acid Cycle	36	0.156014	0.00242613
3	Reactome 2-ketoglutarate dehydrogenase complex deficiency	36	0.156014	0.00242613
3	KEGG Urea Cycle	36	0.156014	0.00242613
3	KEGG urea cycle	36	0.156014	0.00242613
3	KEGG Ornithine Transcarbamylase Deficiency (OTC Deficiency)	36	0.156014	0.00242613
3	KEGG folate polyglutamylation	36	0.156014	0.00242613
3	KEGG Citrullinemia Type I	36	0.156014	0.00242613
3	KEGG Carbamoyl Phosphate Synthetase Deficiency	36	0.156014	0.00242613
3	KEGG Argininosuccinic Aciduria	36	0.156014	0.00242613
3	KEGG Argininemia	36	0.156014	0.00242613
3	INOH Butanoate metabolism ( Butanoate metabolism )	36	0.156014	0.00242613
3	HPRD TSH	36	0.156014	0.00242613
6	HumanCyc superpathway of conversion of glucose to acetyl CoA and entry into the TCA cycle	171	0.156043	0.00242613
4	SMPDB Pyruvate dehydrogenase deficiency (E3)	75	0.156386	0.00242613
4	SMPDB Pyruvate dehydrogenase deficiency (E2)	75	0.156386	0.00242613
4	SMPDB Mitochondrial complex II deficiency	75	0.156386	0.00242613
4	SMPDB Fumarase deficiency	75	0.156386	0.00242613
4	SMPDB Congenital lactic acidosis	75	0.156386	0.00242613
4	SMPDB Citric Acid Cycle	75	0.156386	0.00242613
4	SMPDB 2-ketoglutarate dehydrogenase complex deficiency	75	0.156386	0.00242613
2	HumanCyc Ion homeostasis	129	0.156535	0.00242613
6	pid IL4-mediated signaling events	172	0.15699	0.00242613
4	pid CD28 dependent PI3K/Akt signaling	76	0.158926	0.00242613
4	KEGG Glycosaminoglycan degradation	76	0.158926	0.00242613
5	PANTHER Alzheimer disease-amyloid secretase pathway	122	0.159061	0.00242613
7	Reactome Reduction of cytosolic Ca++ levels	284	0.159834	0.00242613
3	Reactome Signaling events regulated by Ret tyrosine kinase	37	0.160771	0.00242613
3	Reactome HDR through Single Strand Annealing (SSA)	37	0.160771	0.00242613
3	Reactome adenosine ribonucleotides de novo biosynthesis	37	0.160771	0.00242613
3	pid untitled	37	0.160771	0.00242613
3	pid TGF-beta receptor signaling	37	0.160771	0.00242613
3	pid Regulation of CDC42 activity	37	0.160771	0.00242613
3	INOH 2 Acetyl-CoA = CoA + Acetoacetyl-CoA ( Tryptophan degradation )	37	0.160771	0.00242613
3	INOH 2 Acetyl-CoA = CoA + Acetoacetyl-CoA ( Pyruvate metabolism )	37	0.160771	0.00242613
3	INOH 2 Acetyl-CoA = CoA + Acetoacetyl-CoA ( Lysine degradation )	37	0.160771	0.00242613
3	INOH 2 Acetyl-CoA = CoA + Acetoacetyl-CoA ( Citrate cycle )	37	0.160771	0.00242613
3	INOH 2 Acetyl-CoA = CoA + Acetoacetyl-CoA ( Butanoate metabolism )	37	0.160771	0.00242613
4	pid E2F transcription factor network	77	0.161428	0.00242613
6	Reactome TRP channels	262	0.162936	0.00242613
6	Reactome Phase 0 - rapid depolarisation	262	0.162936	0.00242613
5	HumanCyc Glycine, serine and threonine metabolism	125	0.163487	0.00242613
2	HumanCyc Ion transport by P-type ATPases	126	0.163702	0.00242613
5	SMPDB Gluconeogenesis	126	0.164907	0.00242613
5	Reactome Erythrocytes take up carbon dioxide and release oxygen	126	0.164907	0.00242613
3	SMPDB Valdecoxib Action Pathway	38	0.165451	0.00242613
3	SMPDB Trisalicylate-choline Action Pathway	38	0.165451	0.00242613
3	SMPDB Tolmetin Action Pathway	38	0.165451	0.00242613
3	SMPDB Tiaprofenic Acid Action Pathway	38	0.165451	0.00242613
3	SMPDB Tenoxicam Action Pathway	38	0.165451	0.00242613
3	SMPDB Suprofen Action Pathway	38	0.165451	0.00242613
3	SMPDB Sulindac Action Pathway	38	0.165451	0.00242613
3	SMPDB Salsalate Action Pathway	38	0.165451	0.00242613
3	SMPDB Salicylic Acid Action Pathway	38	0.165451	0.00242613
3	SMPDB Salicylate-sodium Action Pathway	38	0.165451	0.00242613
3	SMPDB Rofecoxib Action Pathway	38	0.165451	0.00242613
3	SMPDB Piroxicam Action Pathway	38	0.165451	0.00242613
3	SMPDB Phenylbutazone Action Pathway	38	0.165451	0.00242613
3	SMPDB Oxaprozin Action Pathway	38	0.165451	0.00242613
3	SMPDB Nepafenac Action Pathway	38	0.165451	0.00242613
3	SMPDB Naproxen Action Pathway	38	0.165451	0.00242613
3	SMPDB Nabumetone Action Pathway	38	0.165451	0.00242613
3	SMPDB Meloxicam Action Pathway	38	0.165451	0.00242613
3	SMPDB Mefenamic Acid Action Pathway	38	0.165451	0.00242613
3	SMPDB Magnesium salicylate Action Pathway	38	0.165451	0.00242613
3	SMPDB Lumiracoxib Action Pathway	38	0.165451	0.00242613
3	SMPDB Lornoxicam Action Pathway	38	0.165451	0.00242613
3	SMPDB Leukotriene C4 Synthesis Deficiency	38	0.165451	0.00242613
3	SMPDB Ketorolac Action Pathway	38	0.165451	0.00242613
3	SMPDB Ketoprofen Action Pathway	38	0.165451	0.00242613
3	SMPDB Indomethacin Action Pathway	38	0.165451	0.00242613
3	SMPDB Flurbiprofen Action Pathway	38	0.165451	0.00242613
3	SMPDB Fenoprofen Action Pathway	38	0.165451	0.00242613
3	SMPDB Etoricoxib Action Pathway	38	0.165451	0.00242613
3	SMPDB Etodolac Action Pathway	38	0.165451	0.00242613
3	SMPDB Diflunisal Action Pathway	38	0.165451	0.00242613
3	SMPDB Diclofenac Action Pathway	38	0.165451	0.00242613
3	SMPDB Celecoxib Action Pathway	38	0.165451	0.00242613
3	SMPDB Carprofen Action Pathway	38	0.165451	0.00242613
3	SMPDB Bromfenac Action Pathway	38	0.165451	0.00242613
3	SMPDB Arachidonic Acid Metabolism	38	0.165451	0.00242613
3	SMPDB Antrafenine Action Pathway	38	0.165451	0.00242613
3	SMPDB Antipyrine Action Pathway	38	0.165451	0.00242613
3	SMPDB Acetylsalicylic Acid Action Pathway	38	0.165451	0.00242613
3	SMPDB Acetaminophen Action Pathway	38	0.165451	0.00242613
3	pid Notch signaling pathway	38	0.165451	0.00242613
3	pid Fanconi anemia pathway	38	0.165451	0.00242613
3	PANTHER GABA-B_receptor_II_signaling	38	0.165451	0.00242613
3	KEGG Glutamic acid and Glutamine metabolism ( Glutamic acid and Glutamine metabolism )	38	0.165451	0.00242613
3	HumanCyc pyrimidine deoxyribonucleotides biosynthesis from CTP	38	0.165451	0.00242613
3	HumanCyc pyrimidine deoxyribonucleosides salvage	38	0.165451	0.00242613
3	HumanCyc Ammonia Recycling	38	0.165451	0.00242613
3	HumanCyc 2-Oxo-glutaric acid + L-Cysteine-sulfinic acid = L-Glutamic acid + 3-Sulfinyl-pyruvic acid ( Methionine and Cysteine metabolism )	38	0.165451	0.00242613
4	Reactome Regulation of PLK1 Activity at G2/M Transition	79	0.166313	0.00242613
4	INOH Pyrimidine metabolism	79	0.166313	0.00242613
5	HumanCyc UDP-N-acetyl-D-glucosamine biosynthesis II	128	0.167662	0.00242613
2	SMPDB Succinyl-CoA + Dihydro-lipoamide = CoA + S-Succinyl-dihydro-lipoamide ( Citrate cycle )	8	0.168145	0.00242613
2	SMPDB pyruvate decarboxylation to acetyl CoA	8	0.168145	0.00242613
2	SMPDB Elevation of cytosolic Ca2+ levels	8	0.168145	0.00242613
2	Reactome IKK activation signaling (through PKC beta and CARMA1:BCL10:MALT1) ( B cell receptor signaling )	8	0.168145	0.00242613
2	Reactome Hedgehog signaling pathway	8	0.168145	0.00242613
2	Reactome ChREBP activates metabolic gene expression	8	0.168145	0.00242613
2	Reactome Asparagine and aspartate biosynthesis	8	0.168145	0.00242613
2	Reactome 4-aminobutyrate degradation	8	0.168145	0.00242613
2	PhosphoSite Signaling mediated by p38-gamma and p38-delta	8	0.168145	0.00242613
2	PANTHER mevalonate pathway	8	0.168145	0.00242613
2	KEGG NADP+ + D-Sorbitol = NADPH + D-Glucose ( Fructose and Mannose metabolism )	8	0.168145	0.00242613
2	KEGG L-Arginino-succinic acid = L-Arginine + Fumaric acid ( Citrate cycle )	8	0.168145	0.00242613
2	KEGG L-Arginino-succinic acid = L-Arginine + Fumaric acid ( Arginine and Proline metabolism )	8	0.168145	0.00242613
2	KEGG L-Arginino-succinic acid = L-Arginine + Fumaric acid ( Alanine,Aspartic acid and Asparagine metabolism )	8	0.168145	0.00242613
2	INOH TNF receptor signaling pathway	8	0.168145	0.00242613
2	INOH IKK activation signaling (through PKC beta and CARMA1:BCL10:MALT1) ( B cell receptor signaling )	8	0.168145	0.00242613
2	INOH Canonical Notch signaling pathway ( Notch signaling pathway Diagram )	8	0.168145	0.00242613
4	SMPDB Phenytoin (Antiarrhythmic) Action Pathway	80	0.168693	0.00242613
5	pid Plexin-D1 Signaling	129	0.168997	0.00242613
5	KEGG Sulfur metabolism	129	0.168997	0.00242613
5	HumanCyc -glutamyl cycle	129	0.168997	0.00242613
3	Reactome Gap-filling DNA repair synthesis and ligation in GG-NER	39	0.170048	0.00242613
3	Reactome Citrate cycle (TCA cycle)	39	0.170048	0.00242613
3	Reactome Arf6 trafficking events	39	0.170048	0.00242613
3	pid Signaling mediated by p38-alpha and p38-beta	39	0.170048	0.00242613
3	PANTHER PDGFR-alpha signaling pathway	39	0.170048	0.00242613
3	KEGG serine biosynthesis (phosphorylated route)	39	0.170048	0.00242613
3	KEGG L-Glutamine + H2O = L-Glutamic acid + NH3 ( Glutamic acid and Glutamine metabolism )	39	0.170048	0.00242613
3	INOH TCA cycle	39	0.170048	0.00242613
3	HumanCyc Astrocytic Glutamate-Glutamine Uptake And Metabolism	39	0.170048	0.00242613
4	Reactome B cell activation	81	0.171031	0.00242613
3	BioGRID EGFR1	161	0.172702	0.00242613
4	Reactome EPHB forward signaling	82	0.173326	0.00242613
4	PANTHER FCERI mediated Ca+2 mobilization	82	0.173326	0.00242613
4	PANTHER BCR signaling pathway	82	0.173326	0.00242613
5	PANTHER Integrin signalling pathway	133	0.174045	0.00242613
5	CTD TNF protein promotes the reaction [CYP19A1 protein affects the chemical synthesis of Estradiol]	133	0.174045	0.00242613
5	CTD N-(2-(4-bromocinnamylamino)ethyl)-5-isoquinolinesulfonamide inhibits the reaction [[FSHB protein co-treated with Testosterone] results in increased chemical synthesis of Estradiol]	133	0.174045	0.00242613
5	CTD Doxorubicin inhibits the reaction [FSHB protein results in increased chemical synthesis of Estradiol]	133	0.174045	0.00242613
3	Reactome Saccharopinuria/Hyperlysinemia II	40	0.174559	0.00242613
3	Reactome Pyridoxine dependency with seizures	40	0.174559	0.00242613
3	Reactome Plexin-D1 Signaling	40	0.174559	0.00242613
3	Reactome Mitochondrial tRNA aminoacylation	40	0.174559	0.00242613
3	Reactome Lysine Degradation	40	0.174559	0.00242613
3	Reactome Hyperlysinemia II or Saccharopinuria	40	0.174559	0.00242613
3	Reactome Hyperlysinemia I, Familial	40	0.174559	0.00242613
3	Reactome 2-aminoadipic 2-oxoadipic aciduria	40	0.174559	0.00242613
3	pid LKB1 signaling events	40	0.174559	0.00242613
3	INOH ATP + CoA + Citric acid = ADP + Acetyl-CoA + Oxaloacetic acid + Orthophosphate ( Lysine degradation )	40	0.174559	0.00242613
3	INOH ATP + CoA + Citric acid = ADP + Acetyl-CoA + Oxaloacetic acid + Orthophosphate ( Citrate cycle )	40	0.174559	0.00242613
3	HumanCyc Folate biosynthesis	40	0.174559	0.00242613
3	HumanCyc Citric acid cycle (TCA cycle)	40	0.174559	0.00242613
5	KEGG Other types of O-glycan biosynthesis	134	0.175233	0.00242613
6	KEGG Porphyrin and chlorophyll metabolism	233	0.176106	0.00242613
6	Reactome Depolarization of the Presynaptic Terminal Triggers the Opening of Calcium Channels	206	0.176781	0.00242613
4	Reactome EPHB-mediated forward signaling	84	0.177782	0.00242613
2	HumanCyc pyrimidine deoxyribonucleotides de novo biosynthesis	120	0.178726	0.00242613
3	SMPDB purine nucleotides de novo biosynthesis	41	0.178982	0.00242613
3	SMPDB Ibuprofen Action Pathway	41	0.178982	0.00242613
3	SMPDB folate polyglutamylation	41	0.178982	0.00242613
3	SMPDB Alanine, aspartate and glutamate metabolism	41	0.178982	0.00242613
3	Reactome Propanoate Metabolism	41	0.178982	0.00242613
3	Reactome Methylmalonic Aciduria Due to Cobalamin-Related Disorders	41	0.178982	0.00242613
3	Reactome Malonyl-coa decarboxylase deficiency	41	0.178982	0.00242613
3	Reactome Malonic Aciduria	41	0.178982	0.00242613
3	INOH Acetyl-CoA + Glycine = CoA + L-2-Amino-3-oxo-butanoic acid ( Glycine and Serine metabolism )	41	0.178982	0.00242613
5	Reactome Striated Muscle Contraction	138	0.179685	0.00242613
5	PANTHER Ionotropic glutamate receptor pathway	138	0.179685	0.00242613
4	Reactome superpathway of conversion of glucose to acetyl CoA and entry into the TCA cycle	85	0.179943	0.00242613
4	Reactome Formation of a pool of free 40S subunits	85	0.179943	0.00242613
4	pid VEGFA-VEGFR2 Pathway	85	0.179943	0.00242613
4	INOH Arginine and Proline metabolism ( Arginine and Proline metabolism )	85	0.179943	0.00242613
4	Reactome Urea cycle	86	0.182057	0.00242613
4	Reactome EPHA2 forward signaling	86	0.182057	0.00242613
4	pid Synthesis of PIPs at the plasma membrane	86	0.182057	0.00242613
4	pid FCERI mediated Ca+2 mobilization	86	0.182057	0.00242613
4	PANTHER untitled	86	0.182057	0.00242613
4	HumanCyc S-adenosyl-L-methionine biosynthesis	86	0.182057	0.00242613
2	Reactome tetrahydrobiopterin de novo biosynthesis	9	0.18265	0.00242613
2	Reactome Succinyl-CoA + Dihydro-lipoamide = CoA + S-Succinyl-dihydro-lipoamide ( Citrate cycle )	9	0.18265	0.00242613
2	Reactome pyruvate decarboxylation to acetyl CoA	9	0.18265	0.00242613
2	PhosphoSite p38 MAPK signaling pathway	9	0.18265	0.00242613
2	PhosphoSite Alpha6Beta4Integrin	9	0.18265	0.00242613
2	PANTHER superpathway of geranylgeranyldiphosphate biosynthesis I (via mevalonate)	9	0.18265	0.00242613
2	NetPath Regulation of retinoblastoma protein	9	0.18265	0.00242613
2	NetPath Activation of NF-kappaB in B cells	9	0.18265	0.00242613
2	KEGG Synthesis of Dolichyl-phosphate	9	0.18265	0.00242613
2	KEGG Succinic acid + Ubiquinone = Fumaric acid + Ubiquinol ( Tyrosine metabolism )	9	0.18265	0.00242613
2	KEGG Succinic acid + Ubiquinone = Fumaric acid + Ubiquinol ( Citrate cycle )	9	0.18265	0.00242613
2	KEGG Succinic acid + Ubiquinone = Fumaric acid + Ubiquinol ( Arginine and Proline metabolism )	9	0.18265	0.00242613
2	KEGG Galactose metabolism ( Galactose metabolism )	9	0.18265	0.00242613
2	INOH Activation of NF-kappaB in B cells	9	0.18265	0.00242613
2	HumanCyc Tetrahydrobiopterin (BH4) synthesis, recycling, salvage and regulation	9	0.18265	0.00242613
5	PANTHER Inflammation mediated by chemokine and cytokine signaling pathway	212	0.182766	0.00242613
3	pid Tie2 Signaling	42	0.183313	0.00242613
3	pid SOS-mediated signalling	42	0.183313	0.00242613
3	pid Signaling events mediated by TCPTP	42	0.183313	0.00242613
3	pid SHC-related events triggered by IGF1R	42	0.183313	0.00242613
3	pid SHC-mediated cascade:FGFR4	42	0.183313	0.00242613
3	pid SHC-mediated cascade:FGFR3	42	0.183313	0.00242613
3	pid SHC-mediated cascade:FGFR2	42	0.183313	0.00242613
3	pid SHC-mediated cascade:FGFR1	42	0.183313	0.00242613
3	pid SHC1 events in ERBB4 signaling	42	0.183313	0.00242613
3	pid SHC1 events in ERBB2 signaling	42	0.183313	0.00242613
3	pid SHC1 events in EGFR signaling	42	0.183313	0.00242613
3	pid RAF/MAP kinase cascade	42	0.183313	0.00242613
3	pid Insulin receptor signalling cascade	42	0.183313	0.00242613
3	pid GRB2 events in ERBB2 signaling	42	0.183313	0.00242613
3	pid GRB2 events in EGFR signaling	42	0.183313	0.00242613
3	pid FRS-mediated FGFR4 signaling	42	0.183313	0.00242613
3	pid FRS-mediated FGFR3 signaling	42	0.183313	0.00242613
3	pid FRS-mediated FGFR2 signaling	42	0.183313	0.00242613
3	pid FRS-mediated FGFR1 signaling	42	0.183313	0.00242613
3	pid EPHB-mediated forward signaling	42	0.183313	0.00242613
3	KEGG Lysine biosynthesis	42	0.183313	0.00242613
3	INOH 2-Oxo-glutaric acid + L-Cysteine-sulfinic acid = L-Glutamic acid + 3-Sulfinyl-pyruvic acid ( Methionine and Cysteine metabolism )	42	0.183313	0.00242613
3	HumanCyc superpathway of pyrimidine deoxyribonucleoside salvage	42	0.183313	0.00242613
4	pid PI5P, PP2A and IER3 Regulate PI3K/AKT Signaling	87	0.184125	0.00242613
4	pid CD40/CD40L signaling	87	0.184125	0.00242613
4	HumanCyc Warburg Effect	87	0.184125	0.00242613
4	KEGG Retinol metabolism	186	0.184422	0.00242613
4	Reactome Nongenotropic Androgen signaling	88	0.186145	0.00242613
4	pid Role of phospholipids in phagocytosis	88	0.186145	0.00242613
4	PANTHER De novo purine biosynthesis	88	0.186145	0.00242613
4	HumanCyc glutamine biosynthesis	88	0.186145	0.00242613
5	HumanCyc Pyruvate metabolism	145	0.186305	0.00242613
5	HumanCyc adenosine ribonucleotides de novo biosynthesis	145	0.186305	0.00242613
3	Reactome VEGFR3 signaling in lymphatic endothelium	43	0.187551	0.00242613
3	Reactome DNA Damage/Telomere Stress Induced Senescence	43	0.187551	0.00242613
3	PANTHER FCERI mediated NF-kB activation	43	0.187551	0.00242613
3	PANTHER CLEC7A (Dectin-1) induces NFAT activation	43	0.187551	0.00242613
3	KEGG Glycine and Serine metabolism ( Glycine and Serine metabolism )	43	0.187551	0.00242613
3	INOH VEGFA-VEGFR2 Pathway	43	0.187551	0.00242613
3	HumanCyc One carbon pool by folate	43	0.187551	0.00242613
4	Reactome Generation of second messenger molecules	89	0.188118	0.00242613
4	Reactome B-WICH complex positively regulates rRNA expression	89	0.188118	0.00242613
4	HumanCyc N-acetylglucosamine degradation I	89	0.188118	0.00242613
5	pid Downstream signaling innaïve CD8+ T cells	149	0.189415	0.00242613
3	PANTHER Heterotrimeric G-protein signaling pathway-Gi alpha and Gs alpha mediated pathway	151	0.190846	0.00242613
5	PANTHER B cell activation	152	0.191427	0.00242613
3	Reactome Termination of translesion DNA synthesis	44	0.191693	0.00242613
3	Reactome Glutaric Aciduria Type I	44	0.191693	0.00242613
3	pid Presenilin action in Notch and Wnt signaling	44	0.191693	0.00242613
3	pid HIV-1 Nef: Negative effector of Fas and TNF-alpha	44	0.191693	0.00242613
3	PANTHER PLC beta mediated events	44	0.191693	0.00242613
3	PANTHER DAG and IP3 signaling	44	0.191693	0.00242613
3	PANTHER Arginine biosynthesis	44	0.191693	0.00242613
3	HumanCyc alanine biosynthesis/degradation	44	0.191693	0.00242613
3	HumanCyc adenosine nucleotides degradation	44	0.191693	0.00242613
4	PANTHER VEGFA-VEGFR2 Pathway	91	0.191919	0.00242613
4	KEGG Fatty acid biosynthesis	91	0.191919	0.00242613
5	Reactome Na+/Cl- dependent neurotransmitter transporters	153	0.192037	0.00242613
2	HumanCyc superpathway of inositol phosphate compounds	114	0.194644	0.00242613
4	Reactome G2/M DNA damage checkpoint	93	0.195525	0.00242613
4	HumanCyc N-acetylglucosamine degradation II	93	0.195525	0.00242613
4	HumanCyc methionine degradation	93	0.195525	0.00242613
3	Reactome UDP-N-acetyl-D-galactosamine biosynthesis II	45	0.195737	0.00242613
3	Reactome Choline catabolism	45	0.195737	0.00242613
3	pid PLK1 signaling events	45	0.195737	0.00242613
3	PANTHER Noncanonical Wnt signaling pathway	45	0.195737	0.00242613
3	BioGRID IL2	45	0.195737	0.00242613
2	TRANSFAC Regulation of nuclear SMAD2/3 signaling	10	0.196422	0.00242613
2	SMPDB glutamine degradation/glutamate biosynthesis	10	0.196422	0.00242613
2	Reactome molybdenum cofactor biosynthesis	10	0.196422	0.00242613
2	Reactome JNK signaling in the CD4+ TCR pathway	10	0.196422	0.00242613
2	Reactome ATF6-alpha activates chaperone genes	10	0.196422	0.00242613
2	Reactome 2-oxoglutarate decarboxylation to succinyl-CoA	10	0.196422	0.00242613
2	pid Alpha6Beta4Integrin	10	0.196422	0.00242613
2	PANTHER Signaling mediated by p38-gamma and p38-delta	10	0.196422	0.00242613
2	PANTHER p38 MAPK signaling pathway	10	0.196422	0.00242613
2	KEGG 2-oxoglutarate decarboxylation to succinyl-CoA	10	0.196422	0.00242613
2	INOH Presenilin action in Notch and Wnt signaling	10	0.196422	0.00242613
2	DIP IL4	10	0.196422	0.00242613
5	NetPath AndrogenReceptor	164	0.196799	0.00242613
4	Reactome HDACs deacetylate histones	94	0.197254	0.00242613
4	PANTHER Downstream TCR signaling	94	0.197254	0.00242613
4	HumanCyc aspartate biosynthesis	94	0.197254	0.00242613
5	HumanCyc superpathway of pyrimidine deoxyribonucleotides de novo biosynthesis	180	0.197746	0.00242613
5	KEGG Tryptophan metabolism	178	0.197986	0.00242613
4	KEGG Pentose phosphate pathway	95	0.198933	0.00242613
3	Reactome Stabilization of p53	46	0.199681	0.00242613
3	Reactome HDR through Homologous Recombination (HRR)	46	0.199681	0.00242613
3	pid Signalling to RAS	46	0.199681	0.00242613
3	PANTHER Glutamine glutamate conversion	46	0.199681	0.00242613
3	KEGG Amino acid synthesis and interconversion (transamination)	46	0.199681	0.00242613
3	HumanCyc Amino acid transport across the plasma membrane	46	0.199681	0.00242613
4	PANTHER Signaling events mediated by Hepatocyte Growth Factor Receptor (c-Met)	96	0.200562	0.00242613
4	HumanCyc folate polyglutamylation	97	0.202141	0.00242613
3	SMPDB Arginine and proline metabolism	47	0.203524	0.00242613
3	Reactome UDP-N-acetyl-D-glucosamine biosynthesis II	47	0.203524	0.00242613
3	Reactome CDP-diacylglycerol biosynthesis	47	0.203524	0.00242613
3	Reactome Butanoate metabolism	47	0.203524	0.00242613
3	KEGG NAD+ + L-Glutamic acid + H2O = NADH + 2-Oxo-glutaric acid + NH3 ( Glutamic acid and Glutamine metabolism )	47	0.203524	0.00242613
3	KEGG NAD+ + L-Glutamic acid + H2O = NADH + 2-Oxo-glutaric acid + NH3 ( Arginine and Proline metabolism )	47	0.203524	0.00242613
3	INOH superpathway of pyrimidine deoxyribonucleotides de novo biosynthesis	47	0.203524	0.00242613
3	INOH D-Glutamine and D-glutamate metabolism	47	0.203524	0.00242613
3	INOH 2-Oxo-glutaric acid + 4-Amino-butanoic acid = L-Glutamic acid + Succinate semialdehyde ( Glutamic acid and Glutamine metabolism )	47	0.203524	0.00242613
3	INOH 2-Oxo-glutaric acid + 4-Amino-butanoic acid = L-Glutamic acid + Succinate semialdehyde ( Arginine and Proline metabolism )	47	0.203524	0.00242613
3	HumanCyc Synthesis of UDP-N-acetyl-glucosamine	47	0.203524	0.00242613
4	HumanCyc superpathway of pyrimidine ribonucleotides de novo biosynthesis	167	0.206113	0.00242613
4	SMPDB Propanoate Metabolism	100	0.206579	0.00242613
4	SMPDB Methylmalonic Aciduria Due to Cobalamin-Related Disorders	100	0.206579	0.00242613
4	SMPDB Malonyl-coa decarboxylase deficiency	100	0.206579	0.00242613
4	SMPDB Malonic Aciduria	100	0.206579	0.00242613
4	KEGG Tyrosine metabolism	100	0.206579	0.00242613
4	INOH Tryptophan degradation ( Tryptophan degradation )	100	0.206579	0.00242613
4	HPRD EGFR1	166	0.207117	0.00242613
3	Reactome Acetylcholine Neurotransmitter Release Cycle	142	0.207261	0.00242613
3	SMPDB beta-Alanine metabolism	48	0.207264	0.00242613
3	Reactome PI3K Cascade	48	0.207264	0.00242613
3	Reactome Cam-PDE 1 activation	48	0.207264	0.00242613
3	Reactome Amino sugar and nucleotide sugar metabolism	48	0.207264	0.00242613
3	pid Effects of Botulinum toxin	48	0.207264	0.00242613
3	PANTHER Ion homeostasis	48	0.207264	0.00242613
3	PANTHER Elevation of cytosolic Ca2+ levels	48	0.207264	0.00242613
3	NetPath TSH	48	0.207264	0.00242613
3	KEGG Succinic semialdehyde dehydrogenase deficiency	48	0.207264	0.00242613
3	KEGG Hyperinsulinism-Hyperammonemia Syndrome	48	0.207264	0.00242613
3	KEGG Homocarnosinosis	48	0.207264	0.00242613
3	KEGG Glutamate Metabolism	48	0.207264	0.00242613
3	KEGG Arginine and Proline metabolism ( Arginine and Proline metabolism )	48	0.207264	0.00242613
3	KEGG 4-Hydroxybutyric Aciduria/Succinic Semialdehyde Dehydrogenase Deficiency	48	0.207264	0.00242613
3	KEGG 2-Hydroxyglutric Aciduria (D And L Form)	48	0.207264	0.00242613
3	INOH Sarcosinemia	48	0.207264	0.00242613
3	INOH Non Ketotic Hyperglycinemia	48	0.207264	0.00242613
3	INOH Hyperglycinemia, non-ketotic	48	0.207264	0.00242613
3	INOH Glycine and Serine Metabolism	48	0.207264	0.00242613
3	INOH Dimethylglycine Dehydrogenase Deficiency	48	0.207264	0.00242613
3	INOH Dihydropyrimidine Dehydrogenase Deficiency (DHPD)	48	0.207264	0.00242613
3	INOH 3-Phosphoglycerate dehydrogenase deficiency	48	0.207264	0.00242613
3	INOH 2-Oxo-glutaric acid + L-Cysteine = L-Glutamic acid + 3-Mercapto-pyruvic acid ( Methionine and Cysteine metabolism )	48	0.207264	0.00242613
3	INOH 2-Oxo-glutaric acid + L-Cysteine = L-Glutamic acid + 3-Mercapto-pyruvic acid ( Glycine and Serine metabolism )	48	0.207264	0.00242613
2	Reactome Detoxification of Reactive Oxygen Species	109	0.208551	0.00242613
2	Reactome Sumoylation by RanBP2 regulates transcriptional repression	11	0.209487	0.00242613
2	Reactome Signaling by NOTCH4	11	0.209487	0.00242613
2	Reactome Signaling by NOTCH3	11	0.209487	0.00242613
2	Reactome cysteine biosynthesis/homocysteine degradation (trans-sulfuration)	11	0.209487	0.00242613
2	PhosphoSite AKT(PKB)-Bad signaling ( IL-7 signaling(JAK1 JAK3 STAT5) )	11	0.209487	0.00242613
2	PhosphoSite AKT(PKB)-Bad signaling ( EPO signaling pathway(JAK2 STAT1 STAT3 STAT5) )	11	0.209487	0.00242613
2	PANTHER superpathway of cholesterol biosynthesis	11	0.209487	0.00242613
2	PANTHER Cytosolic tRNA aminoacylation	11	0.209487	0.00242613
2	NetPath mTOR signaling pathway	11	0.209487	0.00242613
2	KEGG Succinyl CoA: 3-ketoacid CoA transferase deficiency	11	0.209487	0.00242613
2	KEGG Ketone Body Metabolism	11	0.209487	0.00242613
2	KEGG glutamate removal from folates	11	0.209487	0.00242613
2	KEGG dolichyl-diphosphooligosaccharide biosynthesis	11	0.209487	0.00242613
2	KEGG Choloyl-CoA + Taurine = CoA + Taurocholic acid ( Methionine and Cysteine metabolism )	11	0.209487	0.00242613
2	KEGG 2 Acetyl-CoA = CoA + Acetoacetyl-CoA ( Tryptophan degradation )	11	0.209487	0.00242613
2	KEGG 2 Acetyl-CoA = CoA + Acetoacetyl-CoA ( Pyruvate metabolism )	11	0.209487	0.00242613
2	KEGG 2 Acetyl-CoA = CoA + Acetoacetyl-CoA ( Lysine degradation )	11	0.209487	0.00242613
2	KEGG 2 Acetyl-CoA = CoA + Acetoacetyl-CoA ( Citrate cycle )	11	0.209487	0.00242613
2	KEGG 2 Acetyl-CoA = CoA + Acetoacetyl-CoA ( Butanoate metabolism )	11	0.209487	0.00242613
2	INOH Taurine and hypotaurine metabolism	11	0.209487	0.00242613
2	INOH NADP+ + D-Glucose = NADPH + D-Glucono-1,5-lactone ( Pentose phosphate cycle )	11	0.209487	0.00242613
2	INOH 2-oxoglutarate decarboxylation to succinyl-CoA	11	0.209487	0.00242613
2	HumanCyc pyruvate decarboxylation to acetyl CoA	11	0.209487	0.00242613
2	HumanCyc Degradation of GABA	11	0.209487	0.00242613
2	HumanCyc Cysteine formation from homocysteine	11	0.209487	0.00242613
2	HumanCyc 2-oxoglutarate decarboxylation to succinyl-CoA	11	0.209487	0.00242613
2	DIP RANKL	11	0.209487	0.00242613
2	DIP IL5	11	0.209487	0.00242613
2	BioGRID IL9	11	0.209487	0.00242613
2	BIND Leptin	11	0.209487	0.00242613
2	BIND IL5	11	0.209487	0.00242613
4	Reactome VEGFR1 specific signals	103	0.210564	0.00242613
3	Reactome PDE3B signalling	49	0.2109	0.00242613
3	Reactome Inhibition of HSL	49	0.2109	0.00242613
3	Reactome Degradation of the extracellular matrix	49	0.2109	0.00242613
3	pid CD209 (DC-SIGN) signaling	49	0.2109	0.00242613
3	pid Calcineurin-regulated NFAT-dependent transcription in lymphocytes	49	0.2109	0.00242613
2	HumanCyc reactive oxygen species degradation	108	0.211397	0.00242613
4	Reactome CaM pathway	105	0.212971	0.00242613
4	pid Signaling events mediated by PTP1B	106	0.2141	0.00242613
4	pid E-cadherin signaling in keratinocytes	106	0.2141	0.00242613
3	SMPDB Succinyl CoA: 3-ketoacid CoA transferase deficiency	50	0.214432	0.00242613
3	SMPDB Ketone Body Metabolism	50	0.214432	0.00242613
3	Reactome Integrin-linked kinase signaling	50	0.214432	0.00242613
3	Reactome G alpha (12/13) signalling events	50	0.214432	0.00242613
3	PANTHER FAS (CD95) signaling pathway	50	0.214432	0.00242613
3	KEGG Pyrimidine Nucleotides and Nucleosides metabolism ( Pyrimidine Nucleotides and Nucleosides metabolism )	50	0.214432	0.00242613
3	KEGG Folate metabolism ( Folate metabolism )	50	0.214432	0.00242613
3	HumanCyc Tyrosine metabolism	50	0.214432	0.00242613
4	Reactome Branched-chain amino acid catabolism	107	0.21518	0.00242613
4	Reactome Ras activation uopn Ca2+ infux through NMDA receptor	108	0.21621	0.00242613
4	pid E-cadherin signaling in the nascent adherens junction	108	0.21621	0.00242613
4	PANTHER EGF receptor signaling pathway	109	0.21719	0.00242613
3	SMPDB Glycolysis / Gluconeogenesis	51	0.217858	0.00242613
3	Reactome Nitrogen metabolism	51	0.217858	0.00242613
3	PANTHER IL2-mediated signaling events	51	0.217858	0.00242613
3	KEGG superpathway of purine nucleotide salvage	51	0.217858	0.00242613
3	INOH folate polyglutamylation	51	0.217858	0.00242613
3	BIND TCR	51	0.217858	0.00242613
4	HumanCyc Purine metabolism	110	0.218122	0.00242613
4	PANTHER T cell activation	153	0.218389	0.00242613
2	Reactome Synthesis of PC	105	0.220059	0.00242613
3	Reactome Thyrotropin-releasing hormone receptor signaling pathway	52	0.221179	0.00242613
3	Reactome CREB phosphorylation through the activation of Adenylate Cyclase	52	0.221179	0.00242613
3	pid FCERI mediated NF-kB activation	52	0.221179	0.00242613
3	PANTHER Asparagine and aspartate biosynthesis	52	0.221179	0.00242613
3	KEGG &beta	52	0.221179	0.00242613
3	KEGG -alanine degradation	52	0.221179	0.00242613
3	INOH Methylenetetrahydrofolate Reductase Deficiency (MTHFRD)	52	0.221179	0.00242613
3	INOH GMP + Pyrophosphate = Guanine + D-5-Phospho-ribosyl 1-diphosphate ( Purine nucleotides and Nucleosides metabolism )	52	0.221179	0.00242613
4	KEGG Glycosphingolipid biosynthesis - ganglio series	114	0.221368	0.00242613
2	SMPDB L-cysteine degradation I	12	0.221869	0.00242613
2	SMPDB cysteine biosynthesis/homocysteine degradation (trans-sulfuration)	12	0.221869	0.00242613
2	Reactome RANKL	12	0.221869	0.00242613
2	Reactome Glutamine glutamate conversion	12	0.221869	0.00242613
2	Reactome FOXM1 transcription factor network	12	0.221869	0.00242613
2	Reactome Cysteine formation from homocysteine	12	0.221869	0.00242613
2	PhosphoSite EPO signaling pathway	12	0.221869	0.00242613
2	PANTHER RANKL	12	0.221869	0.00242613
2	PANTHER Astrocytic Glutamate-Glutamine Uptake And Metabolism	12	0.221869	0.00242613
2	NetPath CLEC7A (Dectin-1) signaling	12	0.221869	0.00242613
2	KEGG Glycogen breakdown (glycogenolysis)	12	0.221869	0.00242613
2	KEGG Cobalamin (Cbl, vitamin B12) transport and metabolism	12	0.221869	0.00242613
2	KEGG cGMP effects	12	0.221869	0.00242613
2	INOH NADP+ + D-Sorbitol = NADPH + D-Glucose ( Fructose and Mannose metabolism )	12	0.221869	0.00242613
2	HumanCyc Homocystinuria, cystathionine beta-synthase deficiency	12	0.221869	0.00242613
2	HumanCyc Homocysteine Degradation	12	0.221869	0.00242613
2	HumanCyc Gamma-cystathionase deficiency (CTH)	12	0.221869	0.00242613
2	HPRD IL9	12	0.221869	0.00242613
2	BioGRID Hedgehog	12	0.221869	0.00242613
2	BIND Alpha6Beta4Integrin	12	0.221869	0.00242613
4	HumanCyc UTP and CTP de novo biosynthesis	147	0.222243	0.00242613
4	Reactome Pyruvate metabolism	116	0.222706	0.00242613
4	PANTHER Cadherin signaling pathway	144	0.22379	0.00242613
4	Reactome Erythrocytes take up oxygen and release carbon dioxide	118	0.223859	0.00242613
3	SMPDB superpathway of methionine degradation	53	0.224393	0.00242613
3	pid Validated transcriptional targets of TAp63 isoforms	53	0.224393	0.00242613
3	KEGG serine and glycine biosynthesis	53	0.224393	0.00242613
4	IntAct EGFR1	121	0.225247	0.00242613
4	Reactome phospho-PLA2 pathway	139	0.225746	0.00242613
4	KEGG Glycosphingolipid biosynthesis - globo series	123	0.225952	0.00242613
4	Reactome HATs acetylate histones	138	0.226038	0.00242613
4	Reactome Smooth Muscle Contraction	137	0.226296	0.00242613
4	PANTHER Metabotropic glutamate receptor group I pathway	125	0.226483	0.00242613
4	PANTHER FGF signaling pathway	125	0.226483	0.00242613
4	KEGG Histidine metabolism	125	0.226483	0.00242613
4	SMPDB Pyruvate Metabolism	126	0.226686	0.00242613
4	SMPDB Pyruvate kinase deficiency	126	0.226686	0.00242613
4	SMPDB Pyruvate Dehydrogenase Complex Deficiency	126	0.226686	0.00242613
4	SMPDB Pyruvate Decarboxylase E1 Component Deficiency (PDHE1 Deficiency)	126	0.226686	0.00242613
4	SMPDB Primary hyperoxaluria II, PH2	126	0.226686	0.00242613
4	SMPDB Leigh Syndrome	126	0.226686	0.00242613
4	pid Arf6 trafficking events	135	0.226706	0.00242613
4	pid Direct p53 effectors	133	0.226971	0.00242613
4	KEGG Biosynthesis of unsaturated fatty acids	130	0.227085	0.00242613
4	Reactome Glycolysis	131	0.227086	0.00242613
3	SMPDB Ion transport by P-type ATPases	54	0.2275	0.00242613
3	Reactome Methionine salvage pathway	54	0.2275	0.00242613
3	Reactome Factors involved in megakaryocyte development and platelet production	54	0.2275	0.00242613
3	pid Apoptosis signaling pathway	54	0.2275	0.00242613
3	NetPath Leptin	54	0.2275	0.00242613
3	KEGG leucine degradation	54	0.2275	0.00242613
3	INOH L-Glutamine + D-Fructose 6-phosphate = L-Glutamic acid + D-Glucosamine 6-phosphate ( Fructose and Mannose metabolism )	54	0.2275	0.00242613
3	INOH L-Glutamine + D-Fructose 6-phosphate = L-Glutamic acid + D-Glucosamine 6-phosphate ( Aminosugars metabolism )	54	0.2275	0.00242613
3	HumanCyc Sulfur amino acid metabolism	54	0.2275	0.00242613
3	HumanCyc Methylenetetrahydrofolate Reductase Deficiency (MTHFRD)	54	0.2275	0.00242613
2	HumanCyc phospholipases	102	0.228891	0.00242613
3	SMPDB Short-chain 3-hydroxyacyl-CoA dehydrogenase deficiency (SCHAD)	55	0.2305	0.00242613
3	SMPDB Mitochondrial Beta-Oxidation of Short Chain Saturated Fatty Acids	55	0.2305	0.00242613
3	Reactome Fanconi Anemia Pathway	55	0.2305	0.00242613
3	INOH Butanoate metabolism	55	0.2305	0.00242613
3	INOH Alanine,Aspartic acid and Asparagine metabolism ( Alanine,Aspartic acid and Asparagine metabolism )	55	0.2305	0.00242613
3	Reactome Inositol phosphate metabolism	56	0.233393	0.00242613
3	PANTHER IL8- and CXCR1-mediated signaling events	56	0.233393	0.00242613
3	KEGG Warburg Effect	56	0.233393	0.00242613
3	KEGG Sarcosinemia	56	0.233393	0.00242613
3	KEGG Non Ketotic Hyperglycinemia	56	0.233393	0.00242613
3	KEGG isoleucine degradation	56	0.233393	0.00242613
3	KEGG Hyperglycinemia, non-ketotic	56	0.233393	0.00242613
3	KEGG Glycine and Serine Metabolism	56	0.233393	0.00242613
3	KEGG Dimethylglycine Dehydrogenase Deficiency	56	0.233393	0.00242613
3	KEGG Dihydropyrimidine Dehydrogenase Deficiency (DHPD)	56	0.233393	0.00242613
3	KEGG 3-Phosphoglycerate dehydrogenase deficiency	56	0.233393	0.00242613
3	HumanCyc Glutamic acid and Glutamine metabolism ( Glutamic acid and Glutamine metabolism )	56	0.233393	0.00242613
2	SMPDB Regulation of insulin secretion	13	0.233592	0.00242613
2	Reactome Regulation of signaling by CBL	13	0.233592	0.00242613
2	Reactome O-linked glycosylation	13	0.233592	0.00242613
2	Reactome Malate-Aspartate Shuttle	13	0.233592	0.00242613
2	Reactome FAS signaling pathway	13	0.233592	0.00242613
2	Reactome CoA + GTP + Succinic acid = Succinyl-CoA + GDP + Orthophosphate ( Citrate cycle )	13	0.233592	0.00242613
2	Reactome alanine biosynthesis/degradation	13	0.233592	0.00242613
2	pid Class IB PI3K non-lipid kinase events	13	0.233592	0.00242613
2	PhosphoSite VEGF signaling pathway ( VEGF signaling pathway )	13	0.233592	0.00242613
2	PhosphoSite PDGFR-alpha signaling pathway	13	0.233592	0.00242613
2	PhosphoSite IL1-mediated signaling events	13	0.233592	0.00242613
2	PANTHER tRNA charging	13	0.233592	0.00242613
2	PANTHER BMP receptor signaling	13	0.233592	0.00242613
2	NetPath IL9	13	0.233592	0.00242613
2	NetPath EPO signaling pathway	13	0.233592	0.00242613
2	KEGG L-cysteine degradation II	13	0.233592	0.00242613
2	KEGG L-cysteine degradation I	13	0.233592	0.00242613
2	KEGG 4-aminobutyrate degradation	13	0.233592	0.00242613
2	INOH Succinic acid + Ubiquinone = Fumaric acid + Ubiquinol ( Tyrosine metabolism )	13	0.233592	0.00242613
2	INOH Succinic acid + Ubiquinone = Fumaric acid + Ubiquinol ( Citrate cycle )	13	0.233592	0.00242613
2	INOH Succinic acid + Ubiquinone = Fumaric acid + Ubiquinol ( Arginine and Proline metabolism )	13	0.233592	0.00242613
2	INOH Primary bile acid biosynthesis	13	0.233592	0.00242613
2	INOH Galactose metabolism	13	0.233592	0.00242613
2	INOH Cobalamin (Cbl, vitamin B12) transport and metabolism	13	0.233592	0.00242613
2	DIP IL6	13	0.233592	0.00242613
3	NetPath RANKL	57	0.236179	0.00242613
3	CTD Zinc Oxide analog promotes the reaction [homoorientin results in decreased phosphorylation of MAPK1 protein]	125	0.236815	0.00242613
3	CTD wortmannin promotes the reaction [ochratoxin A results in increased phosphorylation of MAPK1 protein]	125	0.236815	0.00242613
3	CTD wortmannin inhibits the reaction [NTS protein results in increased phosphorylation of MAPK1 protein]	125	0.236815	0.00242613
3	CTD wortmannin inhibits the reaction [CXCL2 protein results in increased phosphorylation of MAPK1 protein]	125	0.236815	0.00242613
3	CTD wortmannin inhibits the reaction [3-(2-hydroxy-4-(1,1-dimethylheptyl)phenyl)-4-(3-hydroxypropyl)cyclohexanol results in increased phosphorylation of MAPK1 protein]	125	0.236815	0.00242613
3	CTD Vanadates promotes the reaction [INS1 protein results in increased phosphorylation of MAPK1 protein]	125	0.236815	0.00242613
3	CTD U 0126 promotes the reaction [1-Methyl-4-phenyl-1,2,3,6-tetrahydropyridine results in decreased phosphorylation of MAPK1 protein]	125	0.236815	0.00242613
3	CTD U 0126 inhibits the reaction [Vitamin K 3 results in increased phosphorylation of MAPK1 protein]	125	0.236815	0.00242613
3	CTD U 0126 inhibits the reaction [tetrabromobisphenol A results in increased phosphorylation of MAPK1 protein]	125	0.236815	0.00242613
3	CTD U 0126 inhibits the reaction [Pyocyanine results in increased phosphorylation of MAPK1 protein]	125	0.236815	0.00242613
3	CTD U 0126 inhibits the reaction [plastochromanol 8 results in increased phosphorylation of MAPK1 protein]	125	0.236815	0.00242613
3	CTD U 0126 inhibits the reaction [Plant Extracts results in increased phosphorylation of MAPK1 protein]	125	0.236815	0.00242613
3	CTD U 0126 inhibits the reaction [pamoic acid results in increased phosphorylation of MAPK1 protein]	125	0.236815	0.00242613
3	CTD U 0126 inhibits the reaction [Palmitic Acid results in increased phosphorylation of MAPK1 protein]	125	0.236815	0.00242613
3	CTD U 0126 inhibits the reaction [Oligopeptides analog results in increased phosphorylation of MAPK1 protein]	125	0.236815	0.00242613
3	CTD U 0126 inhibits the reaction [nickel sulfate results in increased phosphorylation of MAPK1 protein]	125	0.236815	0.00242613
3	CTD U 0126 inhibits the reaction [methoxyacetic acid results in increased phosphorylation of MAPK1 protein]	125	0.236815	0.00242613
3	CTD U 0126 inhibits the reaction [Lindane results in increased phosphorylation of MAPK1 protein]	125	0.236815	0.00242613
3	CTD U 0126 inhibits the reaction [IL17A protein results in increased phosphorylation of MAPK1 protein]	125	0.236815	0.00242613
3	CTD U 0126 inhibits the reaction [IGF1 protein results in increased phosphorylation of MAPK1 protein]	125	0.236815	0.00242613
3	CTD U 0126 inhibits the reaction [FGF7 protein results in increased phosphorylation of MAPK1 protein]	125	0.236815	0.00242613
3	CTD U 0126 inhibits the reaction [FGF10 protein results in increased phosphorylation of MAPK1 protein]	125	0.236815	0.00242613
3	CTD U 0126 inhibits the reaction [EGF protein results in increased phosphorylation of MAPK1 protein]	125	0.236815	0.00242613
3	CTD U 0126 inhibits the reaction [Deoxyglucose results in increased phosphorylation of MAPK1 protein]	125	0.236815	0.00242613
3	CTD U 0126 inhibits the reaction [Deoxycholic Acid results in increased phosphorylation of MAPK1 protein]	125	0.236815	0.00242613
3	CTD U 0126 inhibits the reaction [cadmium sulfate results in increased phosphorylation of MAPK1 protein]	125	0.236815	0.00242613
3	CTD U 0126 inhibits the reaction [7-ketocholesterol results in increased phosphorylation of MAPK1 protein]	125	0.236815	0.00242613
3	CTD U 0126 inhibits the reaction [4-hydroxyestradiol results in increased phosphorylation of MAPK1 protein]	125	0.236815	0.00242613
3	CTD U 0126 affects the reaction [Benzo(a)pyrene results in decreased phosphorylation of MAPK1 protein]	125	0.236815	0.00242613
3	CTD tyrphostin AG 1478 inhibits the reaction [[Toluene 2,4-Diisocyanate binds to ALB protein] results in increased phosphorylation of MAPK1 protein]	125	0.236815	0.00242613
3	CTD tyrphostin AG 1478 inhibits the reaction [TGFA protein results in increased phosphorylation of MAPK1 protein]	125	0.236815	0.00242613
3	CTD tyrphostin AG 1478 inhibits the reaction [TAC1 protein results in increased phosphorylation of MAPK1 protein]	125	0.236815	0.00242613
3	CTD tyrphostin AG 1478 inhibits the reaction [lead nitrate results in increased phosphorylation of MAPK1 protein]	125	0.236815	0.00242613
3	CTD tyrphostin AG 1478 inhibits the reaction [Iloprost results in increased phosphorylation of MAPK1 protein]	125	0.236815	0.00242613
3	CTD tyrphostin AG 1478 inhibits the reaction [Doxorubicin results in increased phosphorylation of MAPK1 protein]	125	0.236815	0.00242613
3	CTD tyrphostin AG 1478 inhibits the reaction [calcium silicate results in increased phosphorylation of MAPK1 protein]	125	0.236815	0.00242613
3	CTD tyrphostin AG 1478 inhibits the reaction [Calcitriol results in increased phosphorylation of MAPK1 protein]	125	0.236815	0.00242613
3	CTD tyrphostin AG 1478 inhibits the reaction [Atrazine results in increased phosphorylation of MAPK1 protein]	125	0.236815	0.00242613
3	CTD tyrphostin AG 1478 inhibits the reaction [Asbestos, Crocidolite results in increased phosphorylation of MAPK1 protein]	125	0.236815	0.00242613
3	CTD tyrphostin AG 1478 inhibits the reaction [Acrolein results in increased phosphorylation of MAPK1 protein]	125	0.236815	0.00242613
3	CTD TXN protein promotes the reaction [Oxygen results in increased phosphorylation of MAPK1 protein]	125	0.236815	0.00242613
3	CTD Tretinoin promotes the reaction [CPG-oligonucleotide results in increased phosphorylation of MAPK1 protein]	125	0.236815	0.00242613
3	CTD TP53 protein inhibits the reaction [Tamoxifen results in decreased phosphorylation of MAPK1 protein]	125	0.236815	0.00242613
3	CTD tipifarnib inhibits the reaction [CSF2 protein results in decreased phosphorylation of MAPK1 protein]	125	0.236815	0.00242613
3	CTD Thymic Factor, Circulating inhibits the reaction [Cisplatin results in increased phosphorylation of MAPK1 protein]	125	0.236815	0.00242613
3	CTD TGFA protein inhibits the reaction [crizotinib results in decreased phosphorylation of MAPK1 protein]	125	0.236815	0.00242613
3	CTD TGFA protein inhibits the reaction [5-((2,6-dichlorobenzyl)sulfonyl)-3-((3,5-dimethyl-4-((2-(pyrrolidin-1-ylmethyl)pyrrolidin-1-yl)carbonyl)-1H-pyrrol-2-yl)methylene)-1,3-dihydro-2H-indol-2-one results in decreased phosphorylation of MAPK1 protein]	125	0.236815	0.00242613
3	CTD tetraiodothyroacetic acid inhibits the reaction [Triiodothyronine results in increased phosphorylation of MAPK1 protein]	125	0.236815	0.00242613
3	CTD tetraiodothyroacetic acid inhibits the reaction [Thyroxine results in increased phosphorylation of MAPK1 protein]	125	0.236815	0.00242613
3	CTD TAS2R105 protein affects the reaction [Cycloheximide results in increased phosphorylation of MAPK1 protein]	125	0.236815	0.00242613
3	CTD tamibarotene promotes the reaction [2-(4-morpholinyl)-8-phenyl-4H-1-benzopyran-4-one results in decreased phosphorylation of MAPK1 protein]	125	0.236815	0.00242613
3	CTD sulforafan inhibits the reaction [Oxidopamine results in increased phosphorylation of MAPK1 protein]	125	0.236815	0.00242613
3	CTD SU 6656 inhibits the reaction [lead acetate results in increased phosphorylation of MAPK1 protein]	125	0.236815	0.00242613
3	CTD Streptozocin inhibits the reaction [AKR1B1 protein results in increased phosphorylation of MAPK1 protein]	125	0.236815	0.00242613
3	CTD SPRY2 mRNA affects the reaction [Nickel results in increased phosphorylation of MAPK1 protein]	125	0.236815	0.00242613
3	CTD sorafenib inhibits the reaction [BRAF protein results in increased phosphorylation of MAPK1 protein]	125	0.236815	0.00242613
3	CTD sodium arsenite inhibits the reaction [BMP6 protein results in decreased phosphorylation of MAPK1 protein]	125	0.236815	0.00242613
3	CTD SOD2 protein affects the reaction [Paclitaxel results in increased phosphorylation of MAPK1 protein]	125	0.236815	0.00242613
3	CTD Silymarin inhibits the reaction [Cadmium Chloride results in increased phosphorylation of MAPK1 protein]	125	0.236815	0.00242613
3	CTD SB 203580 promotes the reaction [bufalin results in increased phosphorylation of MAPK1 protein]	125	0.236815	0.00242613
3	CTD SB 203580 inhibits the reaction [Dinitrochlorobenzene results in decreased phosphorylation of MAPK1 protein]	125	0.236815	0.00242613
3	CTD salubrinal inhibits the reaction [Cyclosporine results in increased phosphorylation of MAPK1 protein]	125	0.236815	0.00242613
3	CTD Rutin inhibits the reaction [[TNF protein co-treated with IFNG protein] results in increased phosphorylation of MAPK1 protein]	125	0.236815	0.00242613
3	CTD Ruthenium Red inhibits the reaction [[allyl isothiocyanate co-treated with TRPA1 protein] results in increased phosphorylation of MAPK1 protein]	125	0.236815	0.00242613
3	CTD Rotenone inhibits the reaction [Aldosterone results in increased phosphorylation of MAPK1 protein]	125	0.236815	0.00242613
3	CTD RHOA mutant form inhibits the reaction [atorvastatin results in decreased phosphorylation of MAPK1 protein]	125	0.236815	0.00242613
3	CTD RGS4 protein affects the reaction [[Timolol co-treated with Phenylephrine] results in increased phosphorylation of MAPK1 protein]	125	0.236815	0.00242613
3	CTD resveratrol inhibits the reaction [[Tetradecanoylphorbol Acetate co-treated with Calcimycin] results in increased phosphorylation of MAPK1 protein]	125	0.236815	0.00242613
3	CTD resveratrol inhibits the reaction [ALB protein results in increased phosphorylation of MAPK1 protein]	125	0.236815	0.00242613
3	CTD resveratrol analog inhibits the reaction [[Cytochalasin B co-treated with C5 protein] results in increased phosphorylation of MAPK1 protein]	125	0.236815	0.00242613
3	CTD resveratrol analog inhibits the reaction [Calcimycin results in increased phosphorylation of MAPK1 protein]	125	0.236815	0.00242613
3	CTD Ranitidine inhibits the reaction [Rotenone results in increased phosphorylation of MAPK1 protein]	125	0.236815	0.00242613
3	CTD RAF1 protein affects the reaction [Tetradecanoylphorbol Acetate results in increased phosphorylation of MAPK1 protein]	125	0.236815	0.00242613
3	CTD RAF1 protein affects the reaction [naringin results in increased phosphorylation of MAPK1 protein]	125	0.236815	0.00242613
3	CTD Quercetin inhibits the reaction [S100B protein results in increased phosphorylation of MAPK1 protein]	125	0.236815	0.00242613
3	CTD Quercetin inhibits the reaction [Cholesterol, LDL metabolite results in increased phosphorylation of MAPK1 protein]	125	0.236815	0.00242613
3	CTD Quercetin inhibits the reaction [APP protein results in increased phosphorylation of MAPK1 protein]	125	0.236815	0.00242613
3	CTD pyrrolidine dithiocarbamic acid promotes the reaction [[Tetradecanoylphorbol Acetate co-treated with Ionomycin] results in increased phosphorylation of MAPK1 protein]	125	0.236815	0.00242613
3	CTD Propranolol inhibits the reaction [Nicotine results in increased phosphorylation of MAPK1 protein]	125	0.236815	0.00242613
3	CTD Progesterone promotes the reaction [Estradiol results in increased phosphorylation of MAPK1 protein]	125	0.236815	0.00242613
3	CTD PRKCE protein promotes the reaction [cobaltous chloride results in increased phosphorylation of MAPK1 protein]	125	0.236815	0.00242613
3	CTD PRKCB protein affects the reaction [Glucose results in increased phosphorylation of MAPK1 protein]	125	0.236815	0.00242613
3	CTD PLD1 protein promotes the reaction [Dactinomycin results in increased phosphorylation of MAPK1 protein]	125	0.236815	0.00242613
3	CTD Plant Preparations inhibits the reaction [lipopolysaccharide, Escherichia coli 0111 B4 results in increased phosphorylation of MAPK1 protein]	125	0.236815	0.00242613
3	CTD Plant Extracts affects the reaction [Diatrizoate affects the phosphorylation of MAPK1 protein]	125	0.236815	0.00242613
3	CTD Plant Extracts affects the reaction [Contrast Media affects the phosphorylation of MAPK1 protein]	125	0.236815	0.00242613
3	CTD pinocembrin inhibits the reaction [Ethanol results in increased phosphorylation of MAPK1 protein]	125	0.236815	0.00242613
3	CTD [Phenanthrolines binds to AHR protein] inhibits the reaction [Hexachlorobenzene results in increased phosphorylation of MAPK1 protein]	125	0.236815	0.00242613
3	CTD Pertussis Toxin inhibits the reaction [zaprinast results in increased phosphorylation of MAPK1 protein]	125	0.236815	0.00242613
3	CTD Pertussis Toxin inhibits the reaction [Tamoxifen results in increased phosphorylation of MAPK1 protein]	125	0.236815	0.00242613
3	CTD Pertussis Toxin inhibits the reaction [Niacin results in increased phosphorylation of MAPK1 protein]	125	0.236815	0.00242613
3	CTD Pertussis Toxin inhibits the reaction [gadolinium chloride results in decreased phosphorylation of MAPK1 protein]	125	0.236815	0.00242613
3	CTD Pertussis Toxin inhibits the reaction [acifran results in increased phosphorylation of MAPK1 protein]	125	0.236815	0.00242613
3	CTD Pentoxifylline inhibits the reaction [N-Formylmethionine Leucyl-Phenylalanine results in increased phosphorylation of MAPK1 protein]	125	0.236815	0.00242613
3	CTD PD 173074 inhibits the reaction [FGF16 protein results in increased phosphorylation of MAPK1 protein]	125	0.236815	0.00242613
3	CTD PD168393 inhibits the reaction [2,2',4,6,6'-pentachlorobiphenyl results in increased phosphorylation of MAPK1 protein]	125	0.236815	0.00242613
3	CTD p38alpha inhibitor CMPD1 promotes the reaction [sodium arsenite results in increased phosphorylation of MAPK1 protein]	125	0.236815	0.00242613
3	CTD Okadaic Acid promotes the reaction [[Ionomycin co-treated with Tetradecanoylphorbol Acetate] results in increased phosphorylation of MAPK1 protein]	125	0.236815	0.00242613
3	CTD [Nicotinic Acids binds to HCAR2 protein] promotes the reaction [Bradykinin results in increased phosphorylation of MAPK1 protein]	125	0.236815	0.00242613
3	CTD Nicotine inhibits the reaction [Fluorouracil results in increased phosphorylation of MAPK1 protein]	125	0.236815	0.00242613
3	CTD NCF2 protein affects the reaction [Particulate Matter results in increased phosphorylation of MAPK1 protein]	125	0.236815	0.00242613
3	CTD naringin inhibits the reaction [TNFSF11 protein results in increased phosphorylation of MAPK1 protein]	125	0.236815	0.00242613
3	CTD Naloxone inhibits the reaction [Morphine results in increased phosphorylation of MAPK1 protein]	125	0.236815	0.00242613
3	CTD N(6)-benzoyl-cyclic AMP inhibits the reaction [Tobacco Smoke Pollution analog results in increased phosphorylation of MAPK1 protein]	125	0.236815	0.00242613
3	CTD N-(2-(4-bromocinnamylamino)ethyl)-5-isoquinolinesulfonamide inhibits the reaction [Selegiline results in increased phosphorylation of MAPK1 protein]	125	0.236815	0.00242613
3	CTD myxothiazol inhibits the reaction [Copper results in increased phosphorylation of MAPK1 protein]	125	0.236815	0.00242613
3	CTD MAP2K1 protein inhibits the reaction [sulindac sulfone results in decreased phosphorylation of MAPK1 protein]	125	0.236815	0.00242613
3	CTD MAP2K1 protein inhibits the reaction [sulindac sulfide results in decreased phosphorylation of MAPK1 protein]	125	0.236815	0.00242613
3	CTD manganese(III)-tetrakis(4-benzoic acid)porphyrin inhibits the reaction [isocarbophos analog results in increased phosphorylation of MAPK1 protein]	125	0.236815	0.00242613
3	CTD Luteolin inhibits the reaction [chromium hexavalent ion results in increased phosphorylation of MAPK1 protein]	125	0.236815	0.00242613
3	CTD Lobeline inhibits the reaction [Nicotine results in decreased phosphorylation of MAPK1 protein]	125	0.236815	0.00242613
3	CTD lead acetate promotes the reaction [APEX1 protein results in increased phosphorylation of MAPK1 protein]	125	0.236815	0.00242613
3	CTD [LCP2 protein co-treated with CSF1R protein] promotes the reaction [Tretinoin results in increased phosphorylation of MAPK1 protein]	125	0.236815	0.00242613
3	CTD lapatinib inhibits the reaction [bortezomib results in increased phosphorylation of MAPK1 protein]	125	0.236815	0.00242613
3	CTD KN 62 inhibits the reaction [[3'-O-(4-benzoyl)benzoyladenosine 5'-triphosphate results in increased activity of P2RX7 protein] results in increased phosphorylation of MAPK1 protein]	125	0.236815	0.00242613
3	CTD JTE 013 inhibits the reaction [sphingosine 1-phosphate results in increased phosphorylation of MAPK1 protein]	125	0.236815	0.00242613
3	CTD Ivermectin inhibits the reaction [lipopolysaccharide, E coli O55-B5 results in increased phosphorylation of MAPK1 protein]	125	0.236815	0.00242613
3	CTD IL1B protein promotes the reaction [allicin results in increased phosphorylation of MAPK1 protein]	125	0.236815	0.00242613
3	CTD IGF1 protein promotes the reaction [1-Methyl-4-phenylpyridinium results in increased phosphorylation of MAPK1 protein]	125	0.236815	0.00242613
3	CTD ID1 protein promotes the reaction [titanium dioxide results in increased phosphorylation of MAPK1 protein]	125	0.236815	0.00242613
3	CTD ICI 118551 inhibits the reaction [[carvedilol binds to ADRB2 protein] results in increased phosphorylation of MAPK1 protein]	125	0.236815	0.00242613
3	CTD Hydrogen Peroxide promotes the reaction [lysophosphatidic acid results in increased phosphorylation of MAPK1 protein]	125	0.236815	0.00242613
3	CTD Hydrogen Peroxide promotes the reaction [Histamine results in increased phosphorylation of MAPK1 protein]	125	0.236815	0.00242613
3	CTD Hydrogen Peroxide promotes the reaction [beta-methylcholine results in increased phosphorylation of MAPK1 protein]	125	0.236815	0.00242613
3	CTD Hydrogen Peroxide inhibits the reaction [tetrathiomolybdate results in decreased phosphorylation of MAPK1 protein]	125	0.236815	0.00242613
3	CTD Hydrogen Peroxide inhibits the reaction [BDNF protein results in increased phosphorylation of MAPK1 protein]	125	0.236815	0.00242613
3	CTD Hydralazine inhibits the reaction [AGT protein results in increased phosphorylation of MAPK1 protein]	125	0.236815	0.00242613
3	CTD HRAS protein affects the reaction [2-amino-1-methyl-6-phenylimidazo(4,5-b)pyridine results in increased phosphorylation of MAPK1 protein]	125	0.236815	0.00242613
3	CTD homoorientin promotes the reaction [Zinc Oxide analog results in decreased phosphorylation of MAPK1 protein]	125	0.236815	0.00242613
3	CTD GSTM1 mutant form promotes the reaction [Vehicle Emissions results in increased phosphorylation of MAPK1 protein]	125	0.236815	0.00242613
3	CTD GPER1 protein promotes the reaction [bisphenol A results in increased phosphorylation of MAPK1 protein]	125	0.236815	0.00242613
3	CTD Glucosamine analog promotes the reaction [IL1B results in increased phosphorylation of MAPK1 protein]	125	0.236815	0.00242613
3	CTD Genistein inhibits the reaction [Capsaicin results in increased phosphorylation of MAPK1 protein]	125	0.236815	0.00242613
3	CTD gefitinib promotes the reaction [[zoledronic acid co-treated with 4-(5-(4-chlorophenyl)-3-(trifluoromethyl)-1H-pyrazol-1-yl)benzenesulfonamide] results in decreased phosphorylation of MAPK1 protein]	125	0.236815	0.00242613
3	CTD gefitinib inhibits the reaction [[Promegestone co-treated with AREG protein] results in increased phosphorylation of MAPK1 protein]	125	0.236815	0.00242613
3	CTD gefitinib inhibits the reaction [Dinoprostone results in increased phosphorylation of MAPK1 protein]	125	0.236815	0.00242613
3	CTD fulvestrant inhibits the reaction [Promegestone results in increased phosphorylation of MAPK1 protein]	125	0.236815	0.00242613
3	CTD Folic Acid inhibits the reaction [IGF1R protein results in increased phosphorylation of MAPK1 protein]	125	0.236815	0.00242613
3	CTD FLT4 protein inhibits the reaction [ciclopirox results in decreased phosphorylation of MAPK1 protein]	125	0.236815	0.00242613
3	CTD FLT4 protein inhibits the reaction [Antifungal Agents results in decreased phosphorylation of MAPK1 protein]	125	0.236815	0.00242613
3	CTD fidarestat inhibits the reaction [IL13 protein results in increased phosphorylation of MAPK1 protein]	125	0.236815	0.00242613
3	CTD FGF1 protein inhibits the reaction [U 0126 results in decreased phosphorylation of MAPK1 protein]	125	0.236815	0.00242613
3	CTD FGF1 protein inhibits the reaction [2-(2-chloro-4-iodophenylamino)-N-cyclopropylmethoxy-3,4-difluoro-5-bromobenzamide results in decreased phosphorylation of MAPK1 protein]	125	0.236815	0.00242613
3	CTD FGF1 protein inhibits the reaction [2-(2-amino-3-methoxyphenyl)-4H-1-benzopyran-4-one results in decreased phosphorylation of MAPK1 protein]	125	0.236815	0.00242613
3	CTD ethyl pyruvate inhibits the reaction [Lipopolysaccharides results in increased phosphorylation of MAPK1 protein]	125	0.236815	0.00242613
3	CTD ethyl 6-(N-(2-chloro-4-fluorophenyl)sulfamoyl)cyclohex-1-ene-1-carboxylate inhibits the reaction [nickel chloride results in increased phosphorylation of MAPK1 protein]	125	0.236815	0.00242613
3	CTD erlotinib inhibits the reaction [carvedilol results in increased phosphorylation of MAPK1 protein]	125	0.236815	0.00242613
3	CTD Epinephrine inhibits the reaction [Estradiol results in decreased phosphorylation of MAPK1 protein]	125	0.236815	0.00242613
3	CTD epigallocatechin gallate inhibits the reaction [Tetrachlorodibenzodioxin results in increased phosphorylation of MAPK1 protein]	125	0.236815	0.00242613
3	CTD epigallocatechin gallate inhibits the reaction [HGF protein results in increased phosphorylation of MAPK1 protein]	125	0.236815	0.00242613
3	CTD EGF protein inhibits the reaction [resveratrol results in increased phosphorylation of MAPK1 protein]	125	0.236815	0.00242613
3	CTD EGF protein inhibits the reaction [NVP-TAE684 results in decreased phosphorylation of MAPK1 protein]	125	0.236815	0.00242613
3	CTD DRD3 protein promotes the reaction [Dopamine results in increased phosphorylation of MAPK1 protein]	125	0.236815	0.00242613
3	CTD diphenyleneiodonium inhibits the reaction [Endosulfan results in increased phosphorylation of MAPK1 protein]	125	0.236815	0.00242613
[truncated: 1,953 more rows]

## Sheet: C_hypermeth_levelone_interactor
Hypermethylation genes_levelone_interactor_in pathway	Pathway name	Total genes in pathway	P-value	FDR_adjust
80	TNFalpha	252	1.44044e-46	2.23616e-30
71	PDGFR-beta signaling pathway	348	5.98581e-31	2.23616e-30
57	TGF_beta_Receptor	203	6.9975e-31	3.5555e-28
66	Signaling events mediated by VEGFR1 and VEGFR2	322	6.8773e-29	3.5555e-28
51	Regulation of Telomerase	171	1.1162e-28	1.30336e-27
63	Signaling events mediated by Hepatocyte Growth Factor Receptor (c-Met)	298	3.15982e-28	1.82343e-26
67	ErbB1 downstream signaling	360	3.17113e-27	5.96097e-26
46	mTOR signaling pathway	147	1.24716e-26	1.051e-24
50	Angiopoietin receptor Tie2-mediated signaling	197	1.77323e-25	6.23762e-23
51	EGFR1	230	9.94285e-24	4.04809e-22
32	FoxO family signaling	68	7.33244e-23	4.29617e-22
56	FGF signaling pathway	307	1.7931e-22	4.29617e-22
35	SOD2 protein promotes the reaction [Paraquat results in increased chemical synthesis of Hydrogen Peroxide]	97	5.44033e-22	4.47233e-22
35	Pyruvic Acid inhibits the reaction [FASL protein results in increased chemical synthesis of Hydrogen Peroxide]	97	5.44033e-22	4.47233e-22
35	manganese(III)-tetrakis(4-benzoic acid)porphyrin inhibits the reaction [INS protein results in increased chemical synthesis of Hydrogen Peroxide]	97	5.44033e-22	4.47233e-22
35	Fructose promotes the reaction [SOD1 protein results in increased chemical synthesis of Hydrogen Peroxide]	97	5.44033e-22	4.47233e-22
35	Copper promotes the reaction [IAPP protein results in increased chemical synthesis of Hydrogen Peroxide]	97	5.44033e-22	4.47233e-22
35	APP protein inhibits the reaction [Copper results in increased chemical synthesis of Hydrogen Peroxide]	97	5.44033e-22	4.47233e-22
52	Osteopontin-mediated events	268	6.13867e-22	9.64744e-22
49	CXCR3-mediated signaling events	235	7.64605e-22	2.1563e-21
50	VEGFR1 specific signals	250	1.3236e-21	2.1563e-21
52	Endothelins	274	1.43767e-21	5.08567e-21
48	EPHB forward signaling	234	3.71974e-21	5.08567e-21
42	VEGF signaling pathway ( VEGF signaling pathway )	171	4.90694e-21	5.08567e-21
42	AKT(PKB)-Bad signaling ( IL-7 signaling(JAK1 JAK3 STAT5) )	171	4.90694e-21	5.08567e-21
42	AKT(PKB)-Bad signaling ( EPO signaling pathway(JAK2 STAT1 STAT3 STAT5) )	171	4.90694e-21	5.08567e-21
49	Netrin-mediated signaling events	248	5.41611e-21	1.41837e-20
54	CDC42 signaling events	311	7.6429e-21	1.73782e-20
50	IFN-gamma pathway	266	1.30988e-20	1.73782e-20
42	Positive regulation of (Transcription of SOCS by STAT dimer) in JAK STAT pathway ( JAK-STAT pathway and regulation pathway Diagram )	177	1.44937e-20	1.73782e-20
43	Thromboxane A2 receptor signaling	188	1.57833e-20	5.62235e-20
42	Arf6 downstream pathway	180	2.45525e-20	2.0988e-19
32	Apoptosis signaling pathway	92	9.09185e-20	2.0988e-19
40	TRAIL signaling pathway	168	1.1694e-19	2.0988e-19
41	Signaling events regulated by Ret tyrosine kinase	179	1.27584e-19	2.0988e-19
48	Fc-epsilon receptor I signaling in mast cells	260	1.55529e-19	3.94204e-18
42	VEGFR3 signaling in lymphatic endothelium	202	8.98266e-19	3.94204e-18
44	Neurotrophic factor-mediated Trk receptor signaling	228	1.3867e-18	6.70849e-18
37	S1P2 pathway	154	2.44248e-18	1.87199e-17
42	Nongenotropic Androgen signaling	214	5.36843e-18	2.73451e-17
46	LPA receptor mediated events	267	9.65377e-18	2.09081e-16
40	CXCR4-mediated signaling events	207	5.64641e-17	2.09081e-16
32	Cellular roles of Anthrax toxin	122	7.5088e-17	7.44003e-16
32	S1P3 pathway	128	2.34736e-16	7.44003e-16
43	BCR signaling pathway	257	3.0813e-16	1.23308e-15
31	Signaling events mediated by PRL	122	5.00856e-16	1.6899e-15
33	TP53 Regulates Metabolic Genes	146	8.88134e-16	1.6899e-15
35	FAS (CD95) signaling pathway	169	1.02938e-15	3.03479e-15
29	Regulation of Androgen receptor activity	109	1.83949e-15	3.03479e-15
34	GMCSF-mediated signaling events	162	1.98176e-15	2.1741e-14
22	Leptin	54	7.56431e-15	2.1741e-14
35	Integrins in angiogenesis	184	9.06423e-15	2.1741e-14
26	p75(NTR)-mediated signaling	92	1.9861e-14	2.1741e-14
34	Noncanonical Wnt signaling pathway	179	2.36238e-14	2.1741e-14
22	Hedgehog signaling events mediated by Gli proteins	58	2.36574e-14	2.1741e-14
29	Syndecan-2-mediated signaling events	123	2.44149e-14	2.1741e-14
30	IL6-mediated signaling events	134	2.58354e-14	8.24186e-14
32	Trk receptor signaling mediated by the MAPK pathway	159	3.87983e-14	8.24186e-14
26	TNF receptor signaling pathway	97	5.47151e-14	8.24186e-14
19	LKB1 signaling events	40	8.68928e-14	8.24186e-14
16	mTORC1-mediated signalling	22	1.09295e-13	8.24186e-14
29	TNF protein promotes the reaction [CYP19A1 protein affects the chemical synthesis of Estradiol]	133	1.2878e-13	1.15003e-13
29	S1P1 pathway	133	1.2878e-13	1.15003e-13
29	N-(2-(4-bromocinnamylamino)ethyl)-5-isoquinolinesulfonamide inhibits the reaction [[FSHB protein co-treated with Testosterone] results in increased chemical synthesis of Estradiol]	133	1.2878e-13	1.15003e-13
29	Doxorubicin inhibits the reaction [FSHB protein results in increased chemical synthesis of Estradiol]	133	1.2878e-13	1.15003e-13
22	Alpha6Beta4Integrin	65	1.46892e-13	3.00285e-13
33	Plasma membrane estrogen receptor signaling	183	2.04934e-13	3.00285e-13
29	ErbB4 signaling events	137	2.41246e-13	5.38809e-13
36	TCR signaling innaïve CD8+ T cells	226	3.55984e-13	5.38809e-13
23	Validated targets of C-MYC transcriptional activation	80	5.86475e-13	5.38809e-13
26	IGF1 pathway	110	6.03475e-13	5.38809e-13
26	a6b1 and a6b4 Integrin signaling	110	6.03475e-13	5.38809e-13
29	IL2-mediated signaling events	144	6.90554e-13	5.38809e-13
27	Oxidative Stress Induced Senescence	122	7.46541e-13	5.71819e-13
27	Signaling events mediated by focal adhesion kinase	123	8.76762e-13	5.71819e-13
34	Trk receptor signaling mediated by PI3K and PLC-gamma	208	9.26477e-13	9.20021e-13
36	TCR signaling innaïve CD4+ T cells	236	1.06964e-12	3.57786e-12
29	TCR	150	1.62759e-12	5.11123e-12
27	BCR	131	3.02136e-12	5.11123e-12
33	RhoA signaling pathway	207	3.73034e-12	5.11123e-12
26	ALK1 signaling events	122	4.29531e-12	5.11123e-12
24	IL1-mediated signaling events	101	4.83375e-12	7.61893e-12
22	p53 pathway	82	6.14095e-12	7.61893e-12
32	Class I PI3K signaling events	200	7.56923e-12	7.61893e-12
18	TSH	48	9.15403e-12	7.61893e-12
25	S1P4 pathway	116	9.60042e-12	1.53337e-11
19	Regulation of nuclear beta catenin signaling and target gene transcription	59	1.74671e-11	1.53337e-11
23	Major pathway of rRNA processing in the nucleolus	98	1.77084e-11	1.53337e-11
22	Ceramide signaling pathway	88	1.90406e-11	1.53337e-11
28	Angiogenesis	157	2.09422e-11	1.53337e-11
29	VEGFR2 mediated vascular permeability	171	2.47401e-11	1.53337e-11
24	Syndecan-1-mediated signaling events	111	2.5068e-11	1.53337e-11
20	p73 transcription factor network	70	2.63684e-11	1.59726e-11
18	IL6	53	3.30319e-11	1.59726e-11
31	IL8- and CXCR2-mediated signaling events	200	3.33559e-11	1.59726e-11
15	Regulation of TP53 Degradation	30	3.39449e-11	1.85282e-11
13	Fas signaling pathway ( Fas signaling pathway )	18	3.91231e-11	1.85282e-11
20	AURKA Activation by TPX2	72	3.96936e-11	5.77569e-11
15	DNA Damage Recognition in GG-NER	32	6.65382e-11	5.77569e-11
30	IL8- and CXCR1-mediated signaling events	194	7.55301e-11	5.77569e-11
19	AP-1 transcription factor network	66	8.16706e-11	5.77569e-11
26	PDGF signaling pathway	143	8.39018e-11	5.77569e-11
18	RANKL	57	8.493e-11	1.02544e-10
18	Signaling events mediated by HDAC Class I	58	1.0645e-10	1.02544e-10
31	Inflammation mediated by chemokine and cytokine signaling pathway	212	1.1724e-10	1.6292e-10
28	PDGFR-alpha signaling pathway	174	1.60587e-10	1.6292e-10
12	mTOR signalling	16	2.03408e-10	1.6292e-10
26	Posttranslational regulation of adherens junction stability and dissassembly	151	2.29106e-10	1.6292e-10
16	Presenilin action in Notch and Wnt signaling	44	2.34186e-10	1.6292e-10
24	Wnt signaling pathway	127	2.55805e-10	1.6292e-10
19	Alpha9 beta1 integrin signaling events	72	2.69926e-10	3.09868e-10
31	FCERI mediated MAPK activation	223	3.44598e-10	3.09868e-10
22	E-cadherin signaling in keratinocytes	106	3.672e-10	6.48487e-10
22	E-cadherin signaling in the nascent adherens junction	108	4.93016e-10	6.48487e-10
22	EGF receptor signaling pathway	109	5.69982e-10	6.58071e-10
13	ATF4 activates genes	25	6.72932e-10	7.61893e-10
25	CD209 (DC-SIGN) signaling	149	8.41987e-10	7.61893e-10
23	Role of Calcineurin-dependent NFAT signaling in lymphocytes	125	9.8881e-10	7.61893e-10
38	Downstream TCR signaling	346	1.09122e-09	7.61893e-10
26	RAC1 signaling pathway	165	1.15418e-09	1.75408e-09
29	VEGFA-VEGFR2 Pathway	211	1.71162e-09	1.75408e-09
13	Energy dependent regulation of mTOR by LKB1-AMPK	28	1.84741e-09	1.75408e-09
22	Ephrin B reverse signaling	119	2.2511e-09	1.75408e-09
18	VEGF signaling pathway	74	2.50183e-09	1.75408e-09
13	Alpha4 beta1 integrin signaling events	29	2.53128e-09	1.75408e-09
19	C-MYB transcription factor network	86	3.05599e-09	1.75408e-09
23	Arf6 trafficking events	135	3.4424e-09	1.75408e-09
25	IL2 signaling events mediated by PI3K	162	3.61566e-09	1.75408e-09
24	Downstream signaling in naiive CD8+ T cells	149	3.81439e-09	1.75408e-09
25	PAR1-mediated thrombin signaling events	163	4.02108e-09	1.75408e-09
18	E2F transcription factor network	77	4.1746e-09	3.79349e-09
24	Insulin Pathway	152	5.31647e-09	3.79349e-09
17	IL3	69	6.50922e-09	3.79349e-09
16	IL4	59	6.69919e-09	3.79349e-09
14	FOXM1 transcription factor network	41	7.52441e-09	3.79349e-09
10	Canonical Wnt signaling pathway ( Xenopus axis formation Wnt signaling pathway Diagram )	13	8.92277e-09	8.17797e-09
10	Canonical Wnt signaling pathway ( Mammalian Wnt signaling pathway Diagram )	13	8.92277e-09	8.17797e-09
10	Canonical Wnt signaling pathway ( C. elegans endoderm induction Wnt signaling pathway Diagram )	13	8.92277e-09	8.17797e-09
10	Canonical Wnt signaling pathway ( Canonical Wnt signaling pathway Diagram )	13	8.92277e-09	8.17797e-09
20	Wnt	106	1.02324e-08	1.04354e-08
32	Signaling by SCF-KIT	283	1.40348e-08	1.04354e-08
27	Regulation of actin dynamics for phagocytic cup formation	205	1.44861e-08	1.04354e-08
14	HIV-1 Nef: Negative effector of Fas and TNF-alpha	44	1.51331e-08	1.30336e-08
18	untitled	86	1.72014e-08	1.30336e-08
22	NCAM signaling for neurite out-growth	138	2.19721e-08	1.30336e-08
10	mRNA decay by 3' to 5' exoribonuclease	15	2.20258e-08	1.30336e-08
16	Prolactin	66	2.40307e-08	1.30336e-08
23	T cell activation	153	2.52699e-08	1.43753e-08
17	Regulation of HSF1-mediated heat shock response	78	2.86583e-08	1.43753e-08
22	CLEC7A (Dectin-1) signaling	141	3.04353e-08	1.43753e-08
17	PAR4-mediated thrombin signaling events	79	3.34021e-08	1.43753e-08
25	Processing of DNA double-strand break ends	185	3.46675e-08	1.43753e-08
15	ATF-2 transcription factor network	58	3.67474e-08	1.43753e-08
17	N-cadherin signaling events	80	3.8849e-08	4.44038e-08
19	Signaling events mediated by PTP1B	106	5.06007e-08	4.44038e-08
15	Caspase Cascade in Apoptosis	60	5.26734e-08	5.44346e-08
19	Arf1 pathway	110	8.25254e-08	5.44346e-08
24	PIP3 activates AKT signaling	181	9.17023e-08	5.44346e-08
22	B cell activation	152	9.39015e-08	5.44346e-08
30	DAP12 signaling	277	9.49877e-08	5.44346e-08
14	Validated transcriptional targets of TAp63 isoforms	53	9.53469e-08	7.77865e-08
9	Activation of BAD and translocation to mitochondria	13	1.17908e-07	7.77865e-08
19	HDR through MMEJ (alt-NHEJ)	114	1.31886e-07	7.77865e-08
10	NADP promotes the reaction [CYP1B1 protein affects the chemical synthesis of 7,8-Dihydro-7,8-dihydroxybenzo(a)pyrene 9,10-oxide]	20	1.44183e-07	1.47529e-07
10	NADP promotes the reaction [CYP1A1 protein affects the chemical synthesis of 7,8-Dihydro-7,8-dihydroxybenzo(a)pyrene 9,10-oxide]	20	1.44183e-07	1.47529e-07
10	Regulation of TNFR1 signaling	21	1.99604e-07	1.47529e-07
13	Effects of Botulinum toxin	48	2.47218e-07	1.47529e-07
28	GPVI-mediated activation cascade	258	2.56877e-07	1.47529e-07
14	Coregulation of Androgen receptor activity	59	2.73962e-07	1.47529e-07
12	Signaling mediated by p38-alpha and p38-beta	39	2.83268e-07	1.47529e-07
37	Role of phospholipids in phagocytosis	422	3.03645e-07	1.47529e-07
29	Synthesis of PIPs at the plasma membrane	280	3.57148e-07	1.47529e-07
16	Macroautophagy	85	4.12551e-07	1.47529e-07
16	Huntington disease	86	4.6958e-07	1.47529e-07
25	WNT mediated activation of DVL	218	5.08256e-07	1.47529e-07
12	Signaling events mediated by TCPTP	42	5.26103e-07	1.47529e-07
22	IL4-mediated signaling events	172	5.73705e-07	1.47529e-07
16	JNK signaling in the CD4+ TCR pathway	88	6.05286e-07	1.47529e-07
26	Signaling by FGFR3 fusions in cancer	237	6.06087e-07	1.47529e-07
26	Downstream signal transduction	237	6.06087e-07	1.47529e-07
26	Constitutive Signaling by EGFRvIII	237	6.06087e-07	1.47529e-07
26	Signaling by FGFR4 in disease	238	6.49226e-07	1.47529e-07
26	Signaling by FGFR3 point mutants in cancer	238	6.49226e-07	1.47529e-07
26	Signaling by FGFR2 in disease	238	6.49226e-07	1.47529e-07
26	Signaling by FGFR1 in disease	238	6.49226e-07	1.47529e-07
26	Constitutive Signaling by Ligand-Responsive EGFR Cancer Variants	238	6.49226e-07	1.47529e-07
19	EPHA2 forward signaling	129	6.5197e-07	1.9806e-07
17	Interleukin signaling pathway	102	6.86631e-07	1.9806e-07
15	Ras Pathway	77	7.24626e-07	1.9806e-07
12	Toll receptor signaling pathway	44	7.7562e-07	2.67769e-07
12	Circadian Clock	44	7.7562e-07	2.67769e-07
18	EPO signaling pathway	118	8.89216e-07	2.67769e-07
11	Hedgehog	36	1.09849e-06	2.67769e-07
22	Signaling by cytosolic FGFR1 fusion mutants	181	1.1887e-06	2.67769e-07
18	Alzheimer disease-amyloid secretase pathway	122	1.33037e-06	2.67769e-07
12	Signaling events mediated by HDAC Class II	47	1.34333e-06	2.67769e-07
11	Insulin receptor signaling (Mammal) ( Insulin receptor signaling (Mammal) )	37	1.35223e-06	2.67769e-07
13	Aurora A signaling	58	1.37359e-06	2.67769e-07
13	TP53 Regulates Transcription of DNA Repair Genes	60	1.86295e-06	2.67769e-07
16	Signaling events mediated by Stem cell factor receptor (c-Kit)	98	1.96211e-06	2.67769e-07
8	Golgi Cisternae Pericentriolar Stack Reorganization	14	2.10679e-06	2.67769e-07
10	FAS signaling pathway	30	2.22812e-06	2.67769e-07
21	GAB1 signalosome	176	2.76634e-06	2.67769e-07
8	Oncogene Induced Senescence	15	2.9942e-06	2.67769e-07
12	Regulation of retinoblastoma protein	52	3.10534e-06	2.67769e-07
19	Angiotensin_II-stimulated_signaling_through_G_proteins_and_beta-arrestin	147	3.3595e-06	2.67769e-07
14	Gap-filling DNA repair synthesis and ligation in TC-NER	78	4.08376e-06	2.67769e-07
8	Y 27632 inhibits the reaction [Cisplatin results in increased expression of CDKN1A mRNA]	16	4.17077e-06	4.51545e-07
8	Vehicle Emissions promotes the reaction [oxidized-L-alpha-1-palmitoyl-2-arachidonoyl-sn-glycero-3-phosphorylcholine affects the expression of CDKN1A mRNA]	16	4.17077e-06	4.51545e-07
8	TRP53 gene inhibits the reaction [Doxorubicin results in increased expression of CDKN1A mRNA]	16	4.17077e-06	4.51545e-07
8	troglitazone promotes the reaction [[IFNG protein co-treated with TNF protein] results in increased expression of CDKN1A mRNA]	16	4.17077e-06	4.51545e-07
8	Tretinoin promotes the reaction [vorinostat results in increased expression of CDKN1A mRNA]	16	4.17077e-06	4.51545e-07
8	Tretinoin promotes the reaction [trichostatin A results in increased expression of CDKN1A mRNA]	16	4.17077e-06	4.51545e-07
8	Tretinoin promotes the reaction [Butyrates results in increased expression of CDKN1A mRNA]	16	4.17077e-06	4.51545e-07
8	TP53 protein affects the reaction [Nickel results in increased expression of CDKN1A mRNA]	16	4.17077e-06	4.51545e-07
8	TP53 protein affects the reaction [nickel chloride results in increased expression of CDKN1A mRNA]	16	4.17077e-06	4.51545e-07
8	TP53 protein affects the reaction [Methyl Methanesulfonate results in increased expression of CDKN1A mRNA]	16	4.17077e-06	4.51545e-07
8	TP53 protein affects the reaction [Hydrogen Peroxide results in increased expression of CDKN1A mRNA]	16	4.17077e-06	4.51545e-07
8	TP53 protein affects the reaction [Cobalt results in increased expression of CDKN1A mRNA]	16	4.17077e-06	4.51545e-07
8	TP53 protein affects the reaction [2-(4,5-dihydro-1,3-thiazol-2-ylthio)-1-(3,4-dihydroxyphenyl)ethanone results in increased expression of CDKN1A mRNA]	16	4.17077e-06	4.51545e-07
8	TP53 protein affects the reaction [2,2-bis(hydroxymethyl)-1-azabicyclo(2,2,2,)octan-3-one results in increased expression of CDKN1A mRNA]	16	4.17077e-06	4.51545e-07
8	TP53 mutant form inhibits the reaction [Progesterone results in increased expression of CDKN1A mRNA]	16	4.17077e-06	4.51545e-07
8	TP53 affects the reaction [Etoposide results in increased expression of CDKN1A mRNA]	16	4.17077e-06	4.51545e-07
8	TP53 affects the reaction [celecoxib results in increased expression of CDKN1A mRNA]	16	4.17077e-06	4.51545e-07
8	Tetradecanoylphorbol Acetate promotes the reaction [Atrazine results in increased expression of CDKN1A mRNA]	16	4.17077e-06	4.51545e-07
8	Tetrachlorodibenzodioxin promotes the reaction [Triiodothyronine results in increased expression of CDKN1A mRNA]	16	4.17077e-06	4.51545e-07
8	Tamoxifen inhibits the reaction [Estradiol results in decreased expression of CDKN1A mRNA]	16	4.17077e-06	4.51545e-07
8	[STAT3 protein binds to CDKN1A promoter] promotes the reaction [Vehicle Emissions results in increased expression of CDKN1A mRNA]	16	4.17077e-06	4.51545e-07
8	[STAT3 protein binds to CDKN1A promoter] promotes the reaction [Particulate Matter results in increased expression of CDKN1A mRNA]	16	4.17077e-06	4.51545e-07
8	SIRT1 protein inhibits the reaction [[Palmitic Acid co-treated with Glucose] results in increased expression of CDKN1A mRNA]	16	4.17077e-06	4.51545e-07
8	Sirolimus promotes the reaction [Fluorouracil results in increased expression of CDKN1A mRNA]	16	4.17077e-06	4.51545e-07
8	Rotenone inhibits the reaction [Oxygen deficiency results in increased expression of CDKN1A mRNA]	16	4.17077e-06	4.51545e-07
8	romidepsin promotes the reaction [Tretinoin results in increased expression of CDKN1A mRNA]	16	4.17077e-06	4.51545e-07
8	resveratrol promotes the reaction [TNF protein results in increased expression of CDKN1A mRNA]	16	4.17077e-06	4.51545e-07
8	PPARD protein inhibits the reaction [sulindac sulfide results in increased expression of CDKN1A mRNA]	16	4.17077e-06	4.51545e-07
8	Plicamycin inhibits the reaction [[Cyclosporine co-treated with NGF protein] results in increased expression of CDKN1A mRNA]	16	4.17077e-06	4.51545e-07
8	pifithrin inhibits the reaction [Benzo(a)pyrene results in increased expression of CDKN1A mRNA]	16	4.17077e-06	4.51545e-07
8	pifithrin inhibits the reaction [Azacitidine results in increased expression of CDKN1A mRNA]	16	4.17077e-06	4.51545e-07
8	Phenylbutyrates promotes the reaction [IFNG protein results in increased expression of CDKN1A mRNA]	16	4.17077e-06	4.51545e-07
8	oxidized-L-alpha-1-palmitoyl-2-arachidonoyl-sn-glycero-3-phosphorylcholine promotes the reaction [Vehicle Emissions affects the expression of CDKN1A mRNA]	16	4.17077e-06	4.51545e-07
8	oxidized-L-alpha-1-palmitoyl-2-arachidonoyl-sn-glycero-3-phosphorylcholine promotes the reaction [Particulate Matter affects the expression of CDKN1A mRNA]	16	4.17077e-06	4.51545e-07
8	nutlin 3 inhibits the reaction [[Ascorbic Acid co-treated with Zinc Acetate, motexafin gadolinium] results in decreased expression of CDKN1A mRNA]	16	4.17077e-06	4.51545e-07
8	nickel chloride promotes the reaction [TP63 mutant form results in increased expression of CDKN1A mRNA]	16	4.17077e-06	4.51545e-07
8	N-(2-(4-bromocinnamylamino)ethyl)-5-isoquinolinesulfonamide inhibits the reaction [TGFB1 protein results in increased expression of CDKN1A mRNA]	16	4.17077e-06	4.51545e-07
8	mithramycin A inhibits the reaction [[TP53 protein binds to SP1 protein] results in increased expression of CDKN1A mRNA]	16	4.17077e-06	4.51545e-07
8	MAPK8 protein affects the reaction [Curcumin results in increased expression of CDKN1A mRNA]	16	4.17077e-06	4.51545e-07
8	HRAS protein promotes the reaction [resveratrol results in increased expression of CDKN1A mRNA]	16	4.17077e-06	4.51545e-07
8	Fluorouracil promotes the reaction [temsirolimus results in increased expression of CDKN1A mRNA]	16	4.17077e-06	4.51545e-07
8	Fluorouracil promotes the reaction [Sirolimus results in increased expression of CDKN1A mRNA]	16	4.17077e-06	4.51545e-07
8	Doxorubicin affects the reaction [RELA protein results in increased expression of CDKN1A mRNA]	16	4.17077e-06	4.51545e-07
8	Dicumarol inhibits the reaction [diaziquone results in increased expression of CDKN1A mRNA]	16	4.17077e-06	4.51545e-07
8	DDIT3 protein affects the reaction [methylselenic acid results in increased expression of CDKN1A mRNA]	16	4.17077e-06	4.51545e-07
8	cotylenin A promotes the reaction [lithocholic acid acetate results in increased expression of CDKN1A mRNA]	16	4.17077e-06	4.51545e-07
8	Cisplatin promotes the reaction [TP53 protein results in increased expression of CDKN1A mRNA]	16	4.17077e-06	4.51545e-07
8	Cisplatin promotes the reaction [nutlin 3 results in increased expression of CDKN1A mRNA]	16	4.17077e-06	4.51545e-07
8	Cisplatin inhibits the reaction [(1,2-bis(1,2-benzisoselenazolone-3(2H)-ketone))ethane results in increased expression of CDKN1A mRNA]	16	4.17077e-06	4.51545e-07
8	belinostat promotes the reaction [decitabine results in increased expression of CDKN1A mRNA]	16	4.17077e-06	4.51545e-07
8	Atrazine promotes the reaction [Tetradecanoylphorbol Acetate results in increased expression of CDKN1A mRNA]	16	4.17077e-06	4.51545e-07
8	[arsenic trioxide results in increased phosphorylation of FOS protein] promotes the reaction [FOS protein results in increased expression of CDKN1A mRNA]	16	4.17077e-06	4.51545e-07
8	arsenic trioxide promotes the reaction [[TGIF1 protein co-treated with HDAC1 protein] results in decreased expression of CDKN1A mRNA]	16	4.17077e-06	4.51545e-07
8	arsenic trioxide promotes the reaction [[FOS protein binds to JUN protein] results in increased expression of CDKN1A mRNA]	16	4.17077e-06	4.51545e-07
8	arsenic trioxide promotes the reaction [[CREBBP protein binds to CDKN1A promoter] results in increased expression of CDKN1A mRNA]	16	4.17077e-06	4.51545e-07
8	anthra(1,9-cd)pyrazol-6(2H)-one promotes the reaction [EGF protein results in increased expression of CDKN1A mRNA]	16	4.17077e-06	4.51545e-07
8	afimoxifene inhibits the reaction [Estrogens results in decreased expression of CDKN1A mRNA]	16	4.17077e-06	4.51545e-07
8	Acetylcysteine inhibits the reaction [sodium arsenite results in increased expression of CDKN1A mRNA]	16	4.17077e-06	4.51545e-07
8	Acetylcysteine inhibits the reaction [ethylenimine quinone results in increased expression of CDKN1A mRNA]	16	4.17077e-06	4.51545e-07
8	(5-fluoro-2-methyl-1-(4-pyridyl)methylene-3-(N-benzyl)-indene)-acetamide hydrochloride promotes the reaction [3,7,11,15-tetramethyl-2,4,6,10,14-hexadecapentaenoic acid results in increased expression of CDKN1A mRNA]	16	4.17077e-06	4.51545e-07
8	2-phenyl-4,4,5,5-tetramethylimidazoline-1-oxyl-3-oxide inhibits the reaction [2-butylamino-2-demethoxy-hypocrellin B results in increased expression of CDKN1A mRNA]	16	4.17077e-06	4.51545e-07
8	2-(2-amino-3-methoxyphenyl)-4H-1-benzopyran-4-one inhibits the reaction [nimesulide results in increased expression of CDKN1A mRNA]	16	4.17077e-06	4.51545e-07
8	2-(2-amino-3-methoxyphenyl)-4H-1-benzopyran-4-one inhibits the reaction [N-(2-cyclohexyloxy-4-nitrophenyl)methanesulfonamide results in increased expression of CDKN1A mRNA]	16	4.17077e-06	4.51545e-07
8	2-(2-amino-3-methoxyphenyl)-4H-1-benzopyran-4-one inhibits the reaction [cotylenin A results in increased expression of CDKN1A mRNA]	16	4.17077e-06	4.51545e-07
8	1,2-Dihydroxybenzene-3,5-Disulfonic Acid Disodium Salt inhibits the reaction [arsenic trioxide results in increased expression of CDKN1A mRNA]	16	4.17077e-06	4.51545e-07
10	Canonical NF-kappaB pathway	33	4.26631e-06	4.51545e-07
9	Attenuation phase	24	4.31212e-06	1.21297e-06
20	RHO GTPases Activate WASPs and WAVEs	167	4.73156e-06	1.21297e-06
11	Transcription-Coupled Nucleotide Excision Repair (TC-NER)	44	5.01589e-06	1.21297e-06
11	Formation of TC-NER Pre-Incision Complex	44	5.01589e-06	1.21297e-06
7	NF-kB signaling ( Toll-like receptor signaling pathway (trough NF-kappaB) )	10	5.30534e-06	1.21297e-06
21	CD28 dependent Vav1 pathway	185	5.36497e-06	1.21297e-06
21	G beta:gamma signalling through PI3Kgamma	187	6.17901e-06	1.21297e-06
20	PI3K events in ERBB4 signaling	172	6.87417e-06	1.21297e-06
20	PI3K events in ERBB2 signaling	172	6.87417e-06	1.21297e-06
20	PI-3K cascade:FGFR4	172	6.87417e-06	1.21297e-06
20	PI-3K cascade:FGFR3	172	6.87417e-06	1.21297e-06
20	PI-3K cascade:FGFR2	172	6.87417e-06	1.21297e-06
20	PI-3K cascade:FGFR1	172	6.87417e-06	1.21297e-06
20	Constitutive Signaling by Aberrant PI3K in Cancer	172	6.87417e-06	1.21297e-06
9	Tolerance of reactive oxygen produced by macrophages	26	6.98948e-06	1.21297e-06
14	Visual signal transduction: Rods	83	7.34976e-06	2.10295e-06
14	Visual signal transduction: Cones	83	7.34976e-06	2.10295e-06
8	Ephrin signaling	18	7.67891e-06	2.63922e-06
8	DSCAM interactions	19	1.01823e-05	2.63922e-06
33	FCERI mediated Ca+2 mobilization	421	1.08626e-05	2.63922e-06
9	Insulin-mediated glucose transport	28	1.09387e-05	2.63922e-06
20	EGFR Transactivation by Gastrin	179	1.1321e-05	2.63922e-06
15	Canonical Wnt signaling pathway	101	1.13841e-05	2.63922e-06
12	Reelin signaling pathway	61	1.14895e-05	2.63922e-06
7	WRN protein affects the reaction [hydroquinone results in increased acetylation of TP53 protein]	13	1.63537e-05	4.33358e-06
7	Tretinoin inhibits the reaction [Cisplatin results in increased acetylation of TP53 protein]	13	1.63537e-05	4.33358e-06
7	Tetrachlorodibenzodioxin inhibits the reaction [Etoposide results in increased acetylation of TP53 protein]	13	1.63537e-05	4.33358e-06
7	SIRT1 protein inhibits the reaction [[Palmitic Acid co-treated with Glucose] results in increased acetylation of TP53 protein]	13	1.63537e-05	4.33358e-06
7	resveratrol promotes the reaction [[LMNA protein binds to SIRT1 protein] results in decreased acetylation of TP53 protein]	13	1.63537e-05	4.33358e-06
7	resveratrol inhibits the reaction [TNF protein results in increased acetylation of TP53 protein]	13	1.63537e-05	4.33358e-06
7	resveratrol inhibits the reaction [Palmitates results in increased acetylation of TP53 protein]	13	1.63537e-05	4.33358e-06
7	resveratrol inhibits the reaction [Glucose results in increased acetylation of TP53 protein]	13	1.63537e-05	4.33358e-06
7	Pentamidine inhibits the reaction [KAT5 protein results in increased acetylation of TP53 protein]	13	1.63537e-05	4.33358e-06
7	[Niacinamide results in decreased activity of SIRT1 protein] promotes the reaction [Hydrogen Peroxide results in increased acetylation of TP53 protein]	13	1.63537e-05	4.33358e-06
7	MTA1 protein inhibits the reaction [resveratrol results in increased acetylation of TP53 protein]	13	1.63537e-05	4.33358e-06
7	Hydrogen Peroxide inhibits the reaction [SIRT1 protein results in decreased acetylation of TP53 protein]	13	1.63537e-05	4.33358e-06
7	Doxorubicin promotes the reaction [diethoxyphosphoryloxymethyl butanoate results in increased acetylation of TP53 protein]	13	1.63537e-05	4.33358e-06
7	diethoxyphosphoryloxymethyl butanoate promotes the reaction [Doxorubicin results in increased acetylation of TP53 protein]	13	1.63537e-05	4.33358e-06
7	Camptothecin inhibits the reaction [6-chloro-2,3,4,9-tetrahydro-1H-carbazole-1-carboxamide results in increased acetylation of TP53 protein]	13	1.63537e-05	4.33358e-06
16	Signalling to RAS	121	1.82345e-05	4.33358e-06
17	Ionotropic glutamate receptor pathway	138	2.03988e-05	4.33358e-06
16	Nicotine pharmacodynamics pathway	123	2.15782e-05	4.33358e-06
10	IL12 signaling mediated by STAT4	42	2.19351e-05	4.33358e-06
7	AKT phosphorylates targets in the cytosol	14	2.26377e-05	4.33358e-06
12	Sucrase-isomaltase deficiency	67	2.44931e-05	7.11237e-06
12	Starch and Sucrose Metabolism	67	2.44931e-05	7.11237e-06
12	Mucopolysaccharidosis VI. Sly syndrome	67	2.44931e-05	7.11237e-06
12	Glycogen synthetase deficiency	67	2.44931e-05	7.11237e-06
12	Glycogenosis, Type VI. Hers disease	67	2.44931e-05	7.11237e-06
12	Glycogenosis, Type IV. Amylopectinosis, Anderson disease	67	2.44931e-05	7.11237e-06
12	Glycogenosis, Type III. Cori disease, Debrancher glycogenosis	67	2.44931e-05	7.11237e-06
10	IL1	43	2.5705e-05	7.11237e-06
12	IL23-mediated signaling events	69	3.0983e-05	7.11237e-06
14	RHO GTPases Activate Formins	98	3.41628e-05	7.11237e-06
10	PLK1 signaling events	45	3.48905e-05	7.11237e-06
10	FOXA1 transcription factor network	45	3.48905e-05	7.11237e-06
16	Plexin-D1 Signaling	129	3.50268e-05	7.11237e-06
15	Pyrimidine Metabolism	115	4.02234e-05	7.11237e-06
8	Alpha-synuclein signaling	25	4.31316e-05	7.11237e-06
9	Insulin receptor signaling ( Insulin receptor signaling (D. melanogaster) )	36	4.98093e-05	7.11237e-06
7	Cocaine inhibits the reaction [CES2 protein results in increased chemical synthesis of Morphine]	17	5.36393e-05	7.11237e-06
10	NRAGE signals death through JNK	48	5.37108e-05	7.11237e-06
22	FCERI mediated NF-kB activation	241	5.53716e-05	7.11237e-06
15	Tie2 Signaling	119	5.56631e-05	1.15841e-05
15	SOS-mediated signalling	119	5.56631e-05	1.15841e-05
15	SHC-mediated cascade:FGFR4	119	5.56631e-05	1.15841e-05
15	SHC-mediated cascade:FGFR3	119	5.56631e-05	1.15841e-05
15	SHC-mediated cascade:FGFR2	119	5.56631e-05	1.15841e-05
15	SHC-mediated cascade:FGFR1	119	5.56631e-05	1.15841e-05
15	SHC1 events in ERBB4 signaling	119	5.56631e-05	1.15841e-05
15	SHC1 events in ERBB2 signaling	119	5.56631e-05	1.15841e-05
15	SHC1 events in EGFR signaling	119	5.56631e-05	1.15841e-05
15	Regulation of Ras family activation	119	5.56631e-05	1.15841e-05
15	GRB2 events in ERBB2 signaling	119	5.56631e-05	1.15841e-05
15	GRB2 events in EGFR signaling	119	5.56631e-05	1.15841e-05
15	FRS-mediated FGFR4 signaling	119	5.56631e-05	1.15841e-05
15	FRS-mediated FGFR3 signaling	119	5.56631e-05	1.15841e-05
15	FRS-mediated FGFR2 signaling	119	5.56631e-05	1.15841e-05
15	FRS-mediated FGFR1 signaling	119	5.56631e-05	1.15841e-05
10	Calcineurin-regulated NFAT-dependent transcription in lymphocytes	49	6.16076e-05	1.15841e-05
14	Beta2 adrenergic receptor signaling pathway	105	6.35295e-05	1.15841e-05
14	Beta1 adrenergic receptor signaling pathway	105	6.35295e-05	1.15841e-05
6	Activation of the AP-1 family of transcription factors	10	6.4076e-05	1.15841e-05
8	Nectin adhesion pathway	27	6.47287e-05	1.40964e-05
15	SHC-related events triggered by IGF1R	122	7.03648e-05	1.40964e-05
15	Insulin receptor signalling cascade	122	7.03648e-05	1.40964e-05
12	G alpha (z) signalling events	79	8.9862e-05	1.40964e-05
20	Heterotrimeric G-protein signaling pathway-Gq alpha and Go alpha mediated pathway	213	9.07836e-05	1.40964e-05
7	Sphingosine 1-phosphate (S1P) pathway	20	0.000111298	1.40964e-05
11	Signal transduction by L1	67	0.000111606	1.40964e-05
19	Glycolysis	199	0.000115935	1.40964e-05
6	JNK cascade ( CD4 T cell receptor signaling (JNK cascade) )	12	0.000123963	1.40964e-05
9	Validated nuclear estrogen receptor alpha network	42	0.000124919	1.40964e-05
9	Rap1 signalling	42	0.000124919	1.40964e-05
11	Cytoskeletal regulation by Rho GTPase	70	0.000152434	1.40964e-05
27	Ca2+ pathway	364	0.000154519	1.40964e-05
20	Activation of NF-kappaB in B cells	224	0.000160696	1.40964e-05
22	Gluconeogenesis	263	0.00016153	1.40964e-05
5	IKK-NF-kappaB cascade ( CD4 T cell receptor signaling (NF-kB cascade) )	6	0.000163575	1.40964e-05
5	IKK-NF-kappaB cascade ( CD4 T cell receptor signaling )	6	0.000163575	1.40964e-05
5	IKK-NF-kappaB cascade ( B cell receptor signaling )	6	0.000163575	1.40964e-05
16	Heterotrimeric G-protein signaling pathway-Gi alpha and Gs alpha mediated pathway	151	0.000164376	1.40964e-05
11	Phenylalanine and tyrosine catabolism	71	0.000168521	1.40964e-05
7	Syndecan-4-mediated signaling events	22	0.000170998	1.40964e-05
7	BBSome-mediated cargo-targeting to cilium	22	0.000170998	1.40964e-05
12	Hedgehog 'off' state	86	0.000172423	1.40964e-05
8	p38 MAPK signaling pathway	33	0.000185695	1.40964e-05
8	ID	33	0.000185695	1.40964e-05
8	Amyloid fiber formation	33	0.000185695	1.40964e-05
11	TGF-beta signaling pathway	72	0.000185985	1.40964e-05
15	Phospholipase C-mediated cascade: FGFR1	136	0.000191119	1.40964e-05
15	Phospholipase C-mediated cascade	136	0.000191119	1.40964e-05
15	FGFR4	136	0.000191119	1.40964e-05
15	FGFR3	136	0.000191119	1.40964e-05
15	FGFR2	136	0.000191119	1.40964e-05
13	Senescence-Associated Secretory Phenotype (SASP)	103	0.000193906	1.40964e-05
7	UCP1 protein inhibits the reaction [TNF protein results in increased chemical synthesis of Reactive Oxygen Species]	23	0.000208916	1.40964e-05
7	UCP1 protein inhibits the reaction [LEP protein results in increased chemical synthesis of Reactive Oxygen Species]	23	0.000208916	1.40964e-05
7	TXN protein inhibits the reaction [Oxygen results in increased chemical synthesis of Reactive Oxygen Species]	23	0.000208916	1.40964e-05
7	Ribonucleosides inhibits the reaction [Glucose deficiency results in increased chemical synthesis of Reactive Oxygen Species]	23	0.000208916	1.40964e-05
7	manganese(III) tetrakis(5,10,15,20-benzoic acid)porphyrin inhibits the reaction [AGT protein results in increased chemical synthesis of Reactive Oxygen Species]	23	0.000208916	1.40964e-05
7	HSPD1 protein promotes the reaction [[TNF protein results in increased expression of SOD2 mRNA] results in decreased chemical synthesis of Reactive Oxygen Species]	23	0.000208916	1.40964e-05
7	CYBA protein promotes the reaction [Glucose results in increased chemical synthesis of Reactive Oxygen Species]	23	0.000208916	1.40964e-05
7	Bilirubin inhibits the reaction [[tin protoporphyrin IX results in decreased activity of HMOX1 protein] results in increased chemical synthesis of Reactive Oxygen Species]	23	0.000208916	1.40964e-05
7	Acetylcysteine inhibits the reaction [TNFSF10 protein results in increased chemical synthesis of Reactive Oxygen Species]	23	0.000208916	1.40964e-05
16	Warburg Effect	155	0.000210535	1.40964e-05
9	Stabilization of p53	46	0.00021345	1.40964e-05
8	Validated transcriptional targets of AP1 family members Fra1 and Fra2	34	0.000216983	1.40964e-05
6	Regulation of TP53 Activity through Methylation	14	0.0002187	1.40964e-05
8	Formation of Incision Complex in GG-NER	35	0.000252305	1.40964e-05
10	Validated targets of C-MYC transcriptional repression	61	0.000257943	1.40964e-05
10	EGFR-dependent Endothelin signaling events	61	0.000257943	1.40964e-05
11	Hedgehog 'on' state	76	0.000271455	1.40964e-05
6	Enzymatic degradation of dopamine by COMT	15	0.000282545	1.40964e-05
6	Depolymerisation of the Nuclear Lamina	15	0.000282545	1.40964e-05
9	Metabotropic glutamate receptor group II pathway	49	0.000308438	1.40964e-05
11	G alpha (s) signalling events	78	0.000324937	1.40964e-05
6	Sema3A PAK dependent Axon repulsion	16	0.000359325	1.40964e-05
6	[EGR1 protein results in increased chemical synthesis of Reactive Oxygen Species]	16	0.000359325	1.40964e-05
5	WRN protein affects the reaction [hydroquinone results in increased expression of TP53 protein]	8	0.000361978	1.40964e-05
5	wortmannin inhibits the reaction [Asbestos, Serpentine results in increased expression of TP53 protein]	8	0.000361978	1.40964e-05
5	[Tretinoin results in increased uptake of Glucose] inhibits the reaction [bis((2-oxindol-3-ylimino)-2-(2-aminoethyl)pyridine-N,N')copper(II) results in increased expression of TP53 protein]	8	0.000361978	1.40964e-05
5	Tretinoin inhibits the reaction [[Copper binds to Isatin, trimethylenediamine] results in increased expression of TP53 protein]	8	0.000361978	1.40964e-05
5	Tetrachlorodibenzodioxin promotes the reaction [Benzo(a)pyrene results in increased expression of TP53 protein]	8	0.000361978	1.40964e-05
5	Tetrachlorodibenzodioxin inhibits the reaction [Etoposide results in increased expression of TP53 protein]	8	0.000361978	1.40964e-05
5	S-Nitrosoglutathione inhibits the reaction [PARK2 protein results in decreased expression of TP53 protein]	8	0.000361978	1.40964e-05
5	SN50 peptide inhibits the reaction [Hydrogen Peroxide results in increased expression of TP53 protein]	8	0.000361978	1.40964e-05
5	sirtinol promotes the reaction [arsenic disulfide results in increased expression of TP53 protein]	8	0.000361978	1.40964e-05
5	S-ethyl glutathione inhibits the reaction [tert-Butylhydroperoxide results in increased expression of TP53 protein]	8	0.000361978	1.40964e-05
5	S-ethyl glutathione inhibits the reaction [Camptothecin results in increased expression of TP53 protein]	8	0.000361978	1.40964e-05
5	SCIO-469 promotes the reaction [bortezomib results in increased expression of TP53 protein]	8	0.000361978	1.40964e-05
5	SB 203580 inhibits the reaction [Pyrogallol results in increased expression of TP53 protein]	8	0.000361978	1.40964e-05
5	rosiglitazone inhibits the reaction [Nicotine results in decreased expression of TP53 protein]	8	0.000361978	1.40964e-05
5	resveratrol promotes the reaction [Capsaicin results in increased expression of TP53 protein]	8	0.000361978	1.40964e-05
5	resveratrol inhibits the reaction [cudraflavone B results in increased expression of TP53 protein]	8	0.000361978	1.40964e-05
5	RAD23B mutant form inhibits the reaction [Cisplatin results in increased expression of TP53 protein]	8	0.000361978	1.40964e-05
5	Plant Extracts inhibits the reaction [TNFSF10 protein results in increased expression of TP53 protein]	8	0.000361978	1.40964e-05
5	pifithrin inhibits the reaction [Simvastatin results in increased expression of TP53 protein]	8	0.000361978	1.40964e-05
5	pifithrin inhibits the reaction [celecoxib results in increased expression of TP53 protein]	8	0.000361978	1.40964e-05
5	pifithrin inhibits the reaction [Azacitidine results in increased expression of TP53 protein]	8	0.000361978	1.40964e-05
5	pifithrin inhibits the reaction [Asbestos, Amosite results in increased expression of TP53 protein]	8	0.000361978	1.40964e-05
5	Phycocyanin inhibits the reaction [Galactose results in increased expression of TP53 protein]	8	0.000361978	1.40964e-05
5	Phosphatidylcholines inhibits the reaction [rubitecan results in increased expression of TP53 protein]	8	0.000361978	1.40964e-05
5	Pentetic Acid inhibits the reaction [pyrithione zinc results in increased expression of TP53 protein]	8	0.000361978	1.40964e-05
5	PCB 180 promotes the reaction [leptomycin B results in increased expression of TP53 protein]	8	0.000361978	1.40964e-05
5	nutlin 3 promotes the reaction [Methotrexate results in increased expression of TP53 protein]	8	0.000361978	1.40964e-05
5	Nicotine inhibits the reaction [Paclitaxel results in increased expression of TP53 protein]	8	0.000361978	1.40964e-05
5	Nicotine inhibits the reaction [gemcitabine results in increased expression of TP53 protein]	8	0.000361978	1.40964e-05
5	NFE2L2 protein affects the reaction [Silver results in increased expression of TP53 protein]	8	0.000361978	1.40964e-05
5	MYC mutant form inhibits the reaction [RO 3306 results in increased expression of TP53 protein]	8	0.000361978	1.40964e-05
5	MYC mutant form inhibits the reaction [N(2)-(2-aminocyclohexyl)-N(6)-(3-chlorophenyl)-9-ethyl-9H-purine-2,6-diamine results in increased expression of TP53 protein]	8	0.000361978	1.40964e-05
5	MYC affects the reaction [Masoprocol results in increased expression of TP53 protein]	8	0.000361978	1.40964e-05
5	MYC affects the reaction [anthra(1,9-cd)pyrazol-6(2H)-one results in increased expression of TP53 protein]	8	0.000361978	1.40964e-05
5	Morphine inhibits the reaction [Dactinomycin results in increased expression of TP53 protein]	8	0.000361978	1.40964e-05
5	monomethylarsonous acid inhibits the reaction [7,8-Dihydro-7,8-dihydroxybenzo(a)pyrene 9,10-oxide results in increased expression of TP53 protein]	8	0.000361978	1.40964e-05
5	Methoxsalen inhibits the reaction [aflatoxin G1 results in increased expression of TP53 protein]	8	0.000361978	1.40964e-05
5	MDM4 protein promotes the reaction [Carmustine results in increased expression of TP53 protein]	8	0.000361978	1.40964e-05
5	mangiferin inhibits the reaction [Oxygen deficiency results in increased expression of TP53 protein]	8	0.000361978	1.40964e-05
5	kolaviron inhibits the reaction [Atrazine results in decreased expression of TP53 protein]	8	0.000361978	1.40964e-05
5	IKBKG deficiency causes anhidrotic ectodermal dysplasia with immunodeficiency (EDA-ID) (via TLR)	8	0.000361978	1.40964e-05
5	HRAS protein promotes the reaction [resveratrol results in increased expression of TP53 protein]	8	0.000361978	1.40964e-05
5	Glutathione inhibits the reaction [diallyl disulfide results in increased expression of TP53 protein]	8	0.000361978	1.40964e-05
5	Genistein promotes the reaction [Fluorouracil results in increased expression of TP53 protein]	8	0.000361978	1.40964e-05
5	Fluorouracil promotes the reaction [[Doxorubicin co-treated with Paclitaxel] results in increased expression of TP53 protein]	8	0.000361978	1.40964e-05
5	Fluorouracil promotes the reaction [allose results in increased expression of TP53 protein]	8	0.000361978	1.40964e-05
5	Dicumarol inhibits the reaction [RB1CC1 protein results in increased expression of TP53 protein]	8	0.000361978	1.40964e-05
5	Dicumarol inhibits the reaction [IL1B protein results in increased expression of TP53 protein]	8	0.000361978	1.40964e-05
5	diacetyldiphenylurea bisguanylhydrazone inhibits the reaction [5,7-dihydroxy-6-methoxy-2-phenylchromen-4-one results in increased expression of TP53 protein]	8	0.000361978	1.40964e-05
5	Curcumin inhibits the reaction [bisphenol A results in decreased expression of TP53 protein]	8	0.000361978	1.40964e-05
5	CSE1L protein promotes the reaction [Doxorubicin results in increased expression of TP53 protein]	8	0.000361978	1.40964e-05
5	CDKN1A affects the reaction [Chromium results in increased expression of TP53 protein]	8	0.000361978	1.40964e-05
5	Caffeine inhibits the reaction [oxaliplatin results in increased expression of TP53 protein]	8	0.000361978	1.40964e-05
5	Caffeine inhibits the reaction [decitabine results in increased expression of TP53 protein]	8	0.000361978	1.40964e-05
5	Caffeine inhibits the reaction [Cytarabine results in increased expression of TP53 protein]	8	0.000361978	1.40964e-05
5	Cadmium inhibits the reaction [Methyl Methanesulfonate results in increased expression of TP53 protein]	8	0.000361978	1.40964e-05
5	benzyloxycarbonylleucyl-leucyl-leucine aldehyde inhibits the reaction [[Ascorbic Acid co-treated with Zinc Acetate, motexafin gadolinium] results in decreased expression of TP53 protein]	8	0.000361978	1.40964e-05
5	Atropine inhibits the reaction [Parathion results in increased expression of TP53 protein]	8	0.000361978	1.40964e-05
5	Atropine inhibits the reaction [Malathion results in increased expression of TP53 protein]	8	0.000361978	1.40964e-05
5	ATM gene inhibits the reaction [sodium arsenite results in increased expression of TP53 protein]	8	0.000361978	1.40964e-05
5	Aspirin inhibits the reaction [sodium bichromate results in increased expression of TP53 protein]	8	0.000361978	1.40964e-05
5	Ascorbic Acid inhibits the reaction [Silicon Dioxide results in increased expression of TP53 protein]	8	0.000361978	1.40964e-05
5	alliin promotes the reaction [FGF2 protein results in increased expression of TP53 protein]	8	0.000361978	1.40964e-05
5	AKT(PKB)-TOR signaling ( Insulin receptor signaling (D. melanogaster) )	8	0.000361978	1.40964e-05
5	AKT(PKB)-mTOR signaling ( Insulin receptor signaling (Mammal) )	8	0.000361978	1.40964e-05
5	Acetylcysteine inhibits the reaction [[Zinc Sulfate co-treated with prolinedithiocarbamate] results in decreased expression of TP53 protein]	8	0.000361978	1.40964e-05
5	Acetylcysteine inhibits the reaction [TNF protein results in increased expression of TP53 protein]	8	0.000361978	1.40964e-05
5	Acetylcysteine inhibits the reaction [N-acetylsphingosine results in increased expression of TP53 protein]	8	0.000361978	1.40964e-05
5	Acetylcysteine inhibits the reaction [cobaltous chloride results in increased expression of TP53 protein]	8	0.000361978	1.40964e-05
5	Acetylcysteine inhibits the reaction [arsenite results in increased expression of TP53 protein]	8	0.000361978	1.40964e-05
5	Acetylcysteine inhibits the reaction [arsenic trioxide results in increased expression of TP53 protein]	8	0.000361978	1.40964e-05
5	Acetylcysteine inhibits the reaction [(6-(4-(2-piperidin-1-ylethoxy)phenyl))-3-pyridin-4-ylpyrazolo(1,5-a)pyrimidine results in increased expression of TP53 protein]	8	0.000361978	1.40964e-05
5	4-(5-(4-chlorophenyl)-3-(trifluoromethyl)-1H-pyrazol-1-yl)benzenesulfonamide inhibits the reaction [4-(N-methyl-N-nitrosamino)-1-(3-pyridyl)-1-butanone results in decreased expression of TP53 protein]	8	0.000361978	1.40964e-05
5	3'-methoxy-4'-nitroflavone inhibits the reaction [Tobacco Smoke Pollution results in decreased expression of TP53 protein]	8	0.000361978	1.40964e-05
5	3'-methoxy-4'-nitroflavone inhibits the reaction [Tetrachlorodibenzodioxin results in decreased expression of TP53 protein]	8	0.000361978	1.40964e-05
5	3'-methoxy-4'-nitroflavone inhibits the reaction [Dioxins results in decreased expression of TP53 protein]	8	0.000361978	1.40964e-05
5	3,7,11,15-tetramethyl-2,4,6,10,14-hexadecapentaenoic acid promotes the reaction [(5-fluoro-2-methyl-1-(4-pyridyl)methylene-3-(N-benzyl)-indene)-acetamide hydrochloride results in increased expression of TP53 protein]	8	0.000361978	1.40964e-05
5	2-morpholin-4-yl-6-thianthren-1-yl-pyran-4-one inhibits the reaction [Mustard Gas results in increased expression of TP53 protein]	8	0.000361978	1.40964e-05
5	[1,8-diazafluoren-one results in decreased activity of HMOX1 protein] inhibits the reaction [cobaltiprotoporphyrin results in increased expression of TP53 protein]	8	0.000361978	1.40964e-05
7	BMP receptor signaling	26	0.000362584	1.61433e-05
13	Purine ribonucleoside monophosphate biosynthesis	112	0.000377425	1.61433e-05
68	Thiele2013 - Human metabolism global reconstruction (Recon 2)	1394	0.000419134	1.61433e-05
7	RORA activates gene expression	27	0.000429405	1.61433e-05
7	[PTGS2 protein results in increased chemical synthesis of Dinoprostone]	27	0.000429405	1.61433e-05
9	Endogenous TLR signaling	52	0.000434544	1.61433e-05
6	TWEAK	17	0.000450568	1.61433e-05
6	p53 pathway feedback loops 2	17	0.000450568	1.61433e-05
10	Degradation of beta-catenin by the destruction complex	67	0.000467846	1.61433e-05
9	Regulation of RAC1 activity	53	0.000484633	1.61433e-05
20	PLC beta mediated events	248	0.000484865	1.61433e-05
8	Tretinoin promotes the reaction [CPG-oligonucleotide results in increased phosphorylation of RB1 protein]	40	0.000502448	1.61433e-05
8	Tetrachlorodibenzodioxin inhibits the reaction [Estradiol results in increased phosphorylation of RB1 protein]	40	0.000502448	1.61433e-05
8	Tetrachlorodibenzodioxin inhibits the reaction [[AHR protein binds to CDK4 protein, CCND1 protein] results in increased phosphorylation of RB1 protein]	40	0.000502448	1.61433e-05
8	temsirolimus promotes the reaction [2-(4-hydroxyphenyl)-3-methyl-1-(4-(2-piperidin-1-yl-ethoxy)-benzyl)-1H-indol-5-ol results in decreased phosphorylation of RB1 protein]	40	0.000502448	1.61433e-05
8	sirtinol promotes the reaction [cudraflavone B results in decreased phosphorylation of RB1 protein]	40	0.000502448	1.61433e-05
8	[Sirolimus co-treated with 2-(4-morpholinyl)-8-phenyl-4H-1-benzopyran-4-one] inhibits the reaction [IL2 protein results in increased phosphorylation of RB1 protein]	40	0.000502448	1.61433e-05
8	SB 203580 inhibits the reaction [FGF2 protein results in increased phosphorylation of RB1 protein]	40	0.000502448	1.61433e-05
8	RB1 protein affects the reaction [palbociclib results in decreased phosphorylation of RB1 protein]	40	0.000502448	1.61433e-05
8	Pertussis Toxin inhibits the reaction [bisphenol A results in increased phosphorylation of RB1 protein]	40	0.000502448	1.61433e-05
8	palbociclib inhibits the reaction [[CDK6 protein binds to CCND3 protein] results in increased phosphorylation of RB1 protein]	40	0.000502448	1.61433e-05
8	NOTCH1 protein inhibits the reaction [MRK 003 results in decreased phosphorylation of RB1 protein]	40	0.000502448	1.61433e-05
8	lycopene inhibits the reaction [Genistein results in increased phosphorylation of RB1 protein]	40	0.000502448	1.61433e-05
8	JUN protein promotes the reaction [sodium arsenite results in increased phosphorylation of RB1 protein]	40	0.000502448	1.61433e-05
8	Glutathione inhibits the reaction [Doxorubicin results in decreased phosphorylation of RB1 protein]	40	0.000502448	1.61433e-05
8	Dexamethasone inhibits the reaction [CDK2 protein results in increased phosphorylation of RB1 protein]	40	0.000502448	1.61433e-05
8	CVT 313 inhibits the reaction [IGF1 protein results in increased phosphorylation of RB1 protein]	40	0.000502448	1.61433e-05
8	CSF1R promotes the reaction [Tretinoin results in decreased phosphorylation of RB1 protein]	40	0.000502448	1.61433e-05
8	CSF1R promotes the reaction [Calcitriol results in decreased phosphorylation of RB1 protein]	40	0.000502448	1.61433e-05
8	[Colforsin co-treated with Theophylline] inhibits the reaction [Etoposide results in decreased phosphorylation of RB1 protein]	40	0.000502448	1.61433e-05
8	calyculin A inhibits the reaction [Hydrogen Peroxide results in decreased phosphorylation of RB1 protein]	40	0.000502448	1.61433e-05
8	alpha-naphthoflavone inhibits the reaction [Tetrachlorodibenzodioxin results in decreased phosphorylation of RB1 protein]	40	0.000502448	1.61433e-05
8	AHR protein affects the reaction [baicalein results in decreased phosphorylation of RB1 protein]	40	0.000502448	1.61433e-05
8	(5-fluoro-2-methyl-1-(4-pyridyl)methylene-3-(N-benzyl)-indene)-acetamide hydrochloride promotes the reaction [3,7,11,15-tetramethyl-2,4,6,10,14-hexadecapentaenoic acid results in decreased phosphorylation of RB1 protein]	40	0.000502448	1.61433e-05
8	4-(5-(4-chlorophenyl)-3-(trifluoromethyl)-1H-pyrazol-1-yl)benzenesulfonamide inhibits the reaction [Nicotine results in increased phosphorylation of RB1 protein]	40	0.000502448	1.61433e-05
8	4-(5-(4-chlorophenyl)-3-(trifluoromethyl)-1H-pyrazol-1-yl)benzenesulfonamide inhibits the reaction [4-(N-methyl-N-nitrosamino)-1-(3-pyridyl)-1-butanone results in increased phosphorylation of RB1 protein]	40	0.000502448	1.61433e-05
8	4-(2-(5,6,7,8-tetrahydro-5,5,8,8-tetramethyl-2-naphthalenyl)-1-propenyl)benzoic acid promotes the reaction [Tetradecanoylphorbol Acetate results in increased phosphorylation of RB1 protein]	40	0.000502448	1.61433e-05
8	2-(2-amino-3-methoxyphenyl)-4H-1-benzopyran-4-one inhibits the reaction [TNF protein results in increased phosphorylation of RB1 protein]	40	0.000502448	1.61433e-05
8	2-(2-amino-3-methoxyphenyl)-4H-1-benzopyran-4-one inhibits the reaction [Tamoxifen results in decreased phosphorylation of RB1 protein]	40	0.000502448	1.61433e-05
8	2-(2-amino-3-methoxyphenyl)-4H-1-benzopyran-4-one inhibits the reaction [Paclitaxel results in increased phosphorylation of RB1 protein]	40	0.000502448	1.61433e-05
7	Ras signaling in the CD4+ TCR pathway	28	0.000505238	1.61433e-05
7	eNOS activation	28	0.000505238	1.61433e-05
5	W 7 inhibits the reaction [Pilocarpine results in increased activity of MAPK8 protein]	9	0.000506607	2.3307e-05
5	SLC2A1 protein inhibits the reaction [Rotenone results in increased activity of MAPK8 protein]	9	0.000506607	2.3307e-05
5	SLC2A1 protein inhibits the reaction [Oxygen deficiency results in increased activity of MAPK8 protein]	9	0.000506607	2.3307e-05
5	Selenomethionine inhibits the reaction [Spermine results in increased activity of MAPK8 protein]	9	0.000506607	2.3307e-05
5	RNF7 protein inhibits the reaction [1-Methyl-4-phenylpyridinium results in increased activity of MAPK8 protein]	9	0.000506607	2.3307e-05
5	Mercaptoethanol inhibits the reaction [Sodium Selenite results in decreased activity of MAPK8 protein]	9	0.000506607	2.3307e-05
5	MAP3K1 protein affects the reaction [Paclitaxel results in increased activity of MAPK8 protein]	9	0.000506607	2.3307e-05
5	MAP2K4 protein affects the reaction [antimony trioxide results in increased activity of MAPK8 protein]	9	0.000506607	2.3307e-05
5	IKK-NFkB cascade ( TNFR1 signaling pathway )	9	0.000506607	2.3307e-05
5	Buthionine Sulfoximine promotes the reaction [arsenic trioxide results in increased activity of MAPK8 protein]	9	0.000506607	2.3307e-05
5	anethole inhibits the reaction [TNF protein results in increased activity of MAPK8 protein]	9	0.000506607	2.3307e-05
5	alpha-Tocopherol inhibits the reaction [Tamoxifen results in increased activity of MAPK8 protein]	9	0.000506607	2.3307e-05
5	AKT1 protein affects the reaction [aplidine results in increased activity of MAPK8 protein]	9	0.000506607	2.3307e-05
5	Acetylcysteine inhibits the reaction [APP protein results in increased activity of MAPK8 protein]	9	0.000506607	2.3307e-05
5	8-(4-chlorophenylthio)guanosine 3',5'-cyclic monophosphorothioate inhibits the reaction [(5-fluoro-2-methyl-1-(4-pyridyl)methylene-3-(N-benzyl)-indene)-acetamide hydrochloride results in increased activity of MAPK8 protein]	9	0.000506607	2.3307e-05
5	4-amino-5-(4-methylphenyl)-7-(tert-butyl)pyrazolo(3,4-d)pyrimidine analog inhibits the reaction [chromium hexavalent ion results in increased activity of MAPK8 protein]	9	0.000506607	2.3307e-05
20	DAG and IP3 signaling	251	0.000549836	2.3307e-05
6	p53 pathway by glucose deprivation	18	0.000557845	2.3307e-05
6	IL-7	18	0.000557845	2.3307e-05
6	Hedgehog signaling pathway	18	0.000557845	2.3307e-05
7	ROS, RNS production in response to bacteria	29	0.000590845	2.3307e-05
12	Recruitment and ATM-mediated phosphorylation of repair and signaling proteins at DNA double strand breaks	102	0.000609456	2.3307e-05
6	Lissencephaly gene (LIS1) in neuronal migration and development	19	0.000682763	2.3307e-05
6	Dissolution of Fibrin Clot	19	0.000682763	2.3307e-05
5	Atypical NF-kappaB pathway	10	0.000687207	2.3307e-05
9	GTP hydrolysis and joining of the 60S ribosomal subunit	57	0.000732343	2.3307e-05
7	Signaling mediated by p38-gamma and p38-delta	31	0.000794528	2.3307e-05
7	Quercetin inhibits the reaction [[Tetradecanoylphorbol Acetate results in increased expression of PTGS2 protein] results in decreased chemical synthesis of Dinoprostone]	31	0.000794528	2.3307e-05
7	p38 MAPK pathway	31	0.000794528	2.3307e-05
7	oleuropein inhibits the reaction [[Tetradecanoylphorbol Acetate results in increased expression of PTGS2 protein] results in increased chemical synthesis of Dinoprostone]	31	0.000794528	2.3307e-05
7	nimesulide inhibits the reaction [PTGS2 protein affects the chemical synthesis of Dinoprostone]	31	0.000794528	2.3307e-05
7	N-(2-cyclohexyloxy-4-nitrophenyl)methanesulfonamide inhibits the reaction [[Tetradecanoylphorbol Acetate results in increased activity of PTGS2 protein] results in increased chemical synthesis of Dinoprostone]	31	0.000794528	2.3307e-05
7	Melitten inhibits the reaction [[Nitroprusside results in increased expression of PTGS2 protein] results in increased chemical synthesis of Dinoprostone]	31	0.000794528	2.3307e-05
7	Indomethacin inhibits the reaction [PTGS1 protein results in increased chemical synthesis of Dinoprostone]	31	0.000794528	2.3307e-05
7	honokiol inhibits the reaction [[Lipopolysaccharides results in increased expression of NOS2 protein] results in increased chemical synthesis of Dinoprostone]	31	0.000794528	2.3307e-05
7	Histamine promotes the reaction [[TLR2 results in increased expression of PTGS2] results in increased chemical synthesis of Dinoprostone]	31	0.000794528	2.3307e-05
7	HIF1A protein promotes the reaction [[Oxygen deficiency results in increased expression of PTGES protein] results in increased chemical synthesis of Dinoprostone]	31	0.000794528	2.3307e-05
7	Flurbiprofen inhibits the reaction [[Lipopolysaccharides results in increased expression of PTGS2 mRNA] results in increased chemical synthesis of Dinoprostone]	31	0.000794528	2.3307e-05
7	Flurbiprofen inhibits the reaction [[IL1B protein results in increased expression of PTGS2 protein] results in increased chemical synthesis of Dinoprostone]	31	0.000794528	2.3307e-05
7	Ascorbic Acid inhibits the reaction [IL1B results in increased chemical synthesis of Dinoprostone]	31	0.000794528	2.3307e-05
7	2-(4-chloro-6-(2,3-dimethylphenylamino)pyrimidin-2-ylthio)octanoic acid inhibits the reaction [[Lipopolysaccharides results in increased activity of PTGES2 protein] results in increased chemical synthesis of Dinoprostone]	31	0.000794528	2.3307e-05
7	2-(2-amino-3-methoxyphenyl)-4H-1-benzopyran-4-one inhibits the reaction [[methanandamide results in increased expression of PTGS2 mRNA] results in increased chemical synthesis of Dinoprostone]	31	0.000794528	2.3307e-05
7	1-phenyl-6,7-dihydroxy-isochroman inhibits the reaction [[Lipopolysaccharides results in increased activity of PTGS2 protein] results in increased chemical synthesis of Dinoprostone]	31	0.000794528	2.3307e-05
6	p38 signaling mediated by MAPKAP kinases	20	0.000826947	2.3307e-05
6	Growth hormone receptor signaling	20	0.000826947	2.3307e-05
10	Purine salvage	74	0.00086596	2.3307e-05
10	Metabotropic glutamate receptor group III pathway	74	0.00086596	2.3307e-05
13	Zinc Oxide analog promotes the reaction [homoorientin results in decreased phosphorylation of MAPK1 protein]	125	0.000875602	2.3307e-05
13	wortmannin promotes the reaction [ochratoxin A results in increased phosphorylation of MAPK1 protein]	125	0.000875602	2.3307e-05
13	wortmannin inhibits the reaction [NTS protein results in increased phosphorylation of MAPK1 protein]	125	0.000875602	2.3307e-05
13	wortmannin inhibits the reaction [CXCL2 protein results in increased phosphorylation of MAPK1 protein]	125	0.000875602	2.3307e-05
13	wortmannin inhibits the reaction [3-(2-hydroxy-4-(1,1-dimethylheptyl)phenyl)-4-(3-hydroxypropyl)cyclohexanol results in increased phosphorylation of MAPK1 protein]	125	0.000875602	2.3307e-05
13	Vanadates promotes the reaction [INS1 protein results in increased phosphorylation of MAPK1 protein]	125	0.000875602	2.3307e-05
13	U 0126 promotes the reaction [1-Methyl-4-phenyl-1,2,3,6-tetrahydropyridine results in decreased phosphorylation of MAPK1 protein]	125	0.000875602	2.3307e-05
13	U 0126 inhibits the reaction [Vitamin K 3 results in increased phosphorylation of MAPK1 protein]	125	0.000875602	2.3307e-05
13	U 0126 inhibits the reaction [tetrabromobisphenol A results in increased phosphorylation of MAPK1 protein]	125	0.000875602	2.3307e-05
13	U 0126 inhibits the reaction [Pyocyanine results in increased phosphorylation of MAPK1 protein]	125	0.000875602	2.3307e-05
13	U 0126 inhibits the reaction [plastochromanol 8 results in increased phosphorylation of MAPK1 protein]	125	0.000875602	2.3307e-05
13	U 0126 inhibits the reaction [Plant Extracts results in increased phosphorylation of MAPK1 protein]	125	0.000875602	2.3307e-05
13	U 0126 inhibits the reaction [pamoic acid results in increased phosphorylation of MAPK1 protein]	125	0.000875602	2.3307e-05
13	U 0126 inhibits the reaction [Palmitic Acid results in increased phosphorylation of MAPK1 protein]	125	0.000875602	2.3307e-05
13	U 0126 inhibits the reaction [Oligopeptides analog results in increased phosphorylation of MAPK1 protein]	125	0.000875602	2.3307e-05
13	U 0126 inhibits the reaction [nickel sulfate results in increased phosphorylation of MAPK1 protein]	125	0.000875602	2.3307e-05
13	U 0126 inhibits the reaction [methoxyacetic acid results in increased phosphorylation of MAPK1 protein]	125	0.000875602	2.3307e-05
13	U 0126 inhibits the reaction [Lindane results in increased phosphorylation of MAPK1 protein]	125	0.000875602	2.3307e-05
13	U 0126 inhibits the reaction [IL17A protein results in increased phosphorylation of MAPK1 protein]	125	0.000875602	2.3307e-05
13	U 0126 inhibits the reaction [IGF1 protein results in increased phosphorylation of MAPK1 protein]	125	0.000875602	2.3307e-05
13	U 0126 inhibits the reaction [FGF7 protein results in increased phosphorylation of MAPK1 protein]	125	0.000875602	2.3307e-05
5	wortmannin inhibits the reaction [Zinc Sulfate results in increased phosphorylation of FOXO1 protein]	11	0.000907975	2.3307e-05
5	wortmannin inhibits the reaction [Zinc results in increased phosphorylation of FOXO1 protein]	11	0.000907975	2.3307e-05
5	wortmannin inhibits the reaction [Etoposide results in increased phosphorylation of FOXO1 protein]	11	0.000907975	2.3307e-05
5	wortmannin inhibits the reaction [Doxorubicin results in increased phosphorylation of FOXO1 protein]	11	0.000907975	2.3307e-05
5	wortmannin inhibits the reaction [Copper Sulfate results in increased phosphorylation of FOXO1 protein]	11	0.000907975	2.3307e-05
5	wortmannin inhibits the reaction [Copper results in increased phosphorylation of FOXO1 protein]	11	0.000907975	2.3307e-05
5	Spry regulation of FGF signaling	11	0.000907975	2.3307e-05
5	resveratrol inhibits the reaction [AKT1 protein results in increased phosphorylation of FOXO1 protein]	11	0.000907975	2.3307e-05
5	Plant Extracts inhibits the reaction [Diatrizoate results in decreased phosphorylation of FOXO1 protein]	11	0.000907975	2.3307e-05
5	Plant Extracts inhibits the reaction [Contrast Media results in decreased phosphorylation of FOXO1 protein]	11	0.000907975	2.3307e-05
5	diphenyleneiodonium inhibits the reaction [VEGFA protein results in increased phosphorylation of FOXO1 protein]	11	0.000907975	2.3307e-05
5	Azathioprine inhibits the reaction [IGF1 protein results in increased phosphorylation of FOXO1 protein]	11	0.000907975	2.3307e-05
7	wortmannin inhibits the reaction [IGF1 protein results in increased activity of MAPK3 protein]	32	0.000914217	2.3307e-05
7	U 0126 inhibits the reaction [titanium dioxide results in increased activity of MAPK3 protein]	32	0.000914217	2.3307e-05
7	U 0126 inhibits the reaction [Genistein results in increased activity of MAPK3 protein]	32	0.000914217	2.3307e-05
7	U 0126 inhibits the reaction [Equol results in increased activity of MAPK3 protein]	32	0.000914217	2.3307e-05
7	tricyclodecane-9-yl-xanthogenate inhibits the reaction [Capsaicin results in increased activity of MAPK3 protein]	32	0.000914217	2.3307e-05
7	Tetrachlorodibenzodioxin inhibits the reaction [[CD40L protein co-treated with IL2 protein, IL6 protein, IL10 protein] affects the activity of MAPK3 protein]	32	0.000914217	2.3307e-05
7	[Terbutaline results in increased activity of ADRB2 protein] inhibits the reaction [Shiga Toxin 2 results in increased activity of MAPK3 protein]	32	0.000914217	2.3307e-05
7	Suramin inhibits the reaction [Hydrogen Peroxide results in increased activity of MAPK3 protein]	32	0.000914217	2.3307e-05
7	sorafenib inhibits the reaction [arsenic trioxide results in increased activity of MAPK3 protein]	32	0.000914217	2.3307e-05
7	SB 258585 inhibits the reaction [5-chloro-2-methyl-3-(1,2,3,6-tetrahydro-4-pyridinyl)-1H-indole results in increased activity of MAPK3 protein]	32	0.000914217	2.3307e-05
7	rosiglitazone promotes the reaction [Chlorpyrifos results in increased activity of MAPK3 protein]	32	0.000914217	2.3307e-05
7	Quinazolines analog inhibits the reaction [EGFR protein results in increased activity of MAPK3 protein]	32	0.000914217	2.3307e-05
7	Plant Extracts inhibits the reaction [sphingosine 1-phosphate results in increased activity of MAPK3 protein]	32	0.000914217	2.3307e-05
7	Pertussis Toxin inhibits the reaction [CNR1 results in increased activity of MAPK3 protein]	32	0.000914217	2.3307e-05
7	Nicotine inhibits the reaction [Cisplatin results in increased activity of MAPK3 protein]	32	0.000914217	2.3307e-05
7	lipopolysaccharide, Escherichia coli 0111 B4 inhibits the reaction [lipopolysaccharide, Escherichia coli 0111 B4 results in increased activity of MAPK3 protein]	32	0.000914217	2.3307e-05
7	HRAS protein promotes the reaction [resveratrol results in increased activity of MAPK3 protein]	32	0.000914217	2.3307e-05
7	GPER1 mutant form inhibits the reaction [Cadmium results in increased activity of MAPK3 protein]	32	0.000914217	2.3307e-05
7	gefitinib inhibits the reaction [EGF results in increased activity of MAPK3 protein]	32	0.000914217	2.3307e-05
7	FR 173657 inhibits the reaction [KNG1 protein results in increased activity of MAPK3 protein]	32	0.000914217	2.3307e-05
7	FR 173657 inhibits the reaction [icatibant results in increased activity of MAPK3 protein]	32	0.000914217	2.3307e-05
7	ERBB2 protein affects the reaction [lapatinib results in decreased activity of MAPK3 protein]	32	0.000914217	2.3307e-05
7	EGFR protein affects the reaction [arsenite results in increased activity of MAPK3 protein]	32	0.000914217	2.3307e-05
7	EGFR protein affects the reaction [arsenic acid results in increased activity of MAPK3 protein]	32	0.000914217	2.3307e-05
7	[EGF protein results in decreased expression of EGFR protein] inhibits the reaction [sodium arsenite results in increased activity of MAPK3 protein]	32	0.000914217	2.3307e-05
7	Digitoxin inhibits the reaction [IL1B protein results in increased activity of MAPK3 protein]	32	0.000914217	2.3307e-05
7	Cycloserine inhibits the reaction [Dronabinol results in increased activity of MAPK3 protein]	32	0.000914217	2.3307e-05
7	Colforsin inhibits the reaction [Shiga Toxin results in increased activity of MAPK3 protein]	32	0.000914217	2.3307e-05
7	CNR1 affects the reaction [Win 55212-2 results in increased activity of MAPK3 protein]	32	0.000914217	2.3307e-05
7	CNR1 affects the reaction [3-(2-hydroxy-4-(1,1-dimethylheptyl)phenyl)-4-(3-hydroxypropyl)cyclohexanol results in increased activity of MAPK3 protein]	32	0.000914217	2.3307e-05
7	CAT inhibits the reaction [Glucose deficiency results in increased activity of MAPK3 protein]	32	0.000914217	2.3307e-05
7	CAMP mutant form inhibits the reaction [Calcitriol results in increased activity of MAPK3 protein]	32	0.000914217	2.3307e-05
7	Aspirin inhibits the reaction [HGF results in increased activity of MAPK3 protein]	32	0.000914217	2.3307e-05
7	alpha-Tocopherol inhibits the reaction [Tamoxifen results in increased activity of MAPK3 protein]	32	0.000914217	2.3307e-05
7	alpha-cyano-(3,4-dihydroxy)-N-benzylcinnamide inhibits the reaction [Nicotine results in decreased activity of MAPK3 protein]	32	0.000914217	2.3307e-05
7	Alcohols inhibits the reaction [Adenosine Triphosphate results in increased activity of MAPK3 protein]	32	0.000914217	2.3307e-05
7	6-hydroxy-2,5,7,8-tetramethylchroman-2-carboxylic acid inhibits the reaction [Cadmium Chloride results in increased activity of MAPK3 protein]	32	0.000914217	2.3307e-05
7	4-((3-bromophenyl)amino)-6,7-dimethoxyquinazoline inhibits the reaction [Paclitaxel results in increased activity of MAPK3 protein]	32	0.000914217	2.3307e-05
7	3-(2-hydroxy-4-(1,1-dimethylheptyl)phenyl)-4-(3-hydroxypropyl)cyclohexanol promotes the reaction [[1-Methyl-3-isobutylxanthine co-treated with Bucladesine] results in increased activity of MAPK3 protein]	32	0.000914217	2.3307e-05
7	3-(2-hydroxy-4-(1,1-dimethylheptyl)phenyl)-4-(3-hydroxypropyl)cyclohexanol promotes the reaction [[1-Methyl-3-isobutylxanthine co-treated with 8-Bromo Cyclic Adenosine Monophosphate] results in increased activity of MAPK3 protein]	32	0.000914217	2.3307e-05
7	2-(4-morpholinyl)-8-phenyl-4H-1-benzopyran-4-one inhibits the reaction [epigallocatechin gallate results in increased activity of MAPK3 protein]	32	0.000914217	2.3307e-05
7	2-(2-chloro-4-iodophenylamino)-N-cyclopropylmethoxy-3,4-difluorobenzamide inhibits the reaction [Tetradecanoylphorbol Acetate results in increased activity of MAPK3 protein]	32	0.000914217	2.3307e-05
7	2-(2-amino-3-methoxyphenyl)-4H-1-benzopyran-4-one inhibits the reaction [Methylmercury Compounds results in increased activity of MAPK3 protein]	32	0.000914217	2.3307e-05
7	2-(2-amino-3-methoxyphenyl)-4H-1-benzopyran-4-one inhibits the reaction [mancozeb results in increased activity of MAPK3 protein]	32	0.000914217	2.3307e-05
7	2-(2-amino-3-methoxyphenyl)-4H-1-benzopyran-4-one inhibits the reaction [[LM-1685 co-treated with carboxyamido-triazole] results in increased activity of MAPK3 protein]	32	0.000914217	2.3307e-05
7	2-(2-amino-3-methoxyphenyl)-4H-1-benzopyran-4-one inhibits the reaction [Glycochenodeoxycholic Acid results in increased activity of MAPK3 protein]	32	0.000914217	2.3307e-05
7	2-(2-amino-3-methoxyphenyl)-4H-1-benzopyran-4-one inhibits the reaction [Acetylcysteine results in increased activity of MAPK3 protein]	32	0.000914217	2.3307e-05
12	reactive oxygen species degradation	108	0.00091518	2.78757e-05
11	Activation of anterior HOX genes in hindbrain development during early embryogenesis	92	0.000987202	2.78757e-05
6	p38MAPK events	21	0.000992039	2.78757e-05
6	Oxidative stress response	21	0.000992039	2.78757e-05
6	Excitatory Neural Signalling Through 5-HTR 7 and Serotonin	21	0.000992039	2.78757e-05
6	Excitatory Neural Signalling Through 5-HTR 6 and Serotonin	21	0.000992039	2.78757e-05
6	Excitatory Neural Signalling Through 5-HTR 4 and Serotonin	21	0.000992039	2.78757e-05
10	Transcriptional regulation of white adipocyte differentiation	76	0.00101854	2.78757e-05
15	oxidative ethanol degradation III	166	0.00106484	2.78757e-05
15	ethanol degradation II	166	0.00106484	2.78757e-05
17	ethanol degradation IV	206	0.00108389	2.78757e-05
11	HDACs deacetylate histones	94	0.00113589	2.78757e-05
5	resveratrol inhibits the reaction [TNF protein results in increased phosphorylation of NFKBIB protein]	12	0.00117301	2.78757e-05
5	ERKs are inactivated	12	0.00117301	2.78757e-05
5	Aspirin inhibits the reaction [TNF results in increased phosphorylation of NFKBIB protein]	12	0.00117301	2.78757e-05
5	Aspirin inhibits the reaction [Hydrogen Peroxide results in increased phosphorylation of NFKBIB protein]	12	0.00117301	2.78757e-05
5	Acetylcysteine inhibits the reaction [Tosylphenylalanyl Chloromethyl Ketone results in decreased phosphorylation of NFKBIB protein]	12	0.00117301	2.78757e-05
14	acetate conversion to acetyl-CoA	150	0.00125216	2.78757e-05
12	G alpha (i) signalling events	113	0.00125437	2.78757e-05
15	Resolution of Sister Chromatid Cohesion	170	0.00129233	2.78757e-05
12	IL12-mediated signaling events	114	0.00133282	2.78757e-05
6	Signaling events mediated by the Hedgehog family	23	0.00139153	2.78757e-05
6	Signaling by ERBB2	23	0.00139153	2.78757e-05
6	RNA Polymerase I Transcription Initiation	23	0.00139153	2.78757e-05
9	PKMTs methylate histone lysines	64	0.00139302	2.78757e-05
12	Alzheimer disease-presenilin pathway	115	0.00141509	2.78757e-05
5	zinc protoporphyrin inhibits the reaction [cobaltiprotoporphyrin results in increased expression of HMOX1 mRNA]	13	0.00148625	2.78757e-05
5	zinc protoporphyrin inhibits the reaction [cilostazol results in increased expression of HMOX1 mRNA]	13	0.00148625	2.78757e-05
5	zinc mesoporphyrin promotes the reaction [Heme results in increased expression of HMOX1 mRNA]	13	0.00148625	2.78757e-05
5	wortmannin inhibits the reaction [Curcumin results in increased expression of HMOX1 mRNA]	13	0.00148625	2.78757e-05
5	Vehicle Emissions promotes the reaction [oxidized-L-alpha-1-palmitoyl-2-arachidonoyl-sn-glycero-3-phosphorylcholine affects the expression of HMOX1 mRNA]	13	0.00148625	2.78757e-05
5	trichostatin A promotes the reaction [Fenretinide results in increased expression of HMOX1 mRNA]	13	0.00148625	2.78757e-05
5	TRAP1 protein affects the reaction [Hydrogen Peroxide results in increased expression of HMOX1 mRNA]	13	0.00148625	2.78757e-05
5	TNF protein inhibits the reaction [[Buthionine Sulfoximine results in decreased abundance of Glutathione] results in increased expression of HMOX1 mRNA]	13	0.00148625	2.78757e-05
5	Tetrachlorodibenzodioxin promotes the reaction [sulforafan results in increased expression of HMOX1 mRNA]	13	0.00148625	2.78757e-05
5	Staurosporine inhibits the reaction [Acrolein results in increased expression of HMOX1 mRNA]	13	0.00148625	2.78757e-05
5	SB 203580 inhibits the reaction [arsenic trioxide results in increased expression of HMOX1 mRNA]	13	0.00148625	2.78757e-05
5	SB 203580 inhibits the reaction [2-butenal results in increased expression of HMOX1 mRNA]	13	0.00148625	2.78757e-05
5	resveratrol inhibits the reaction [tert-Butylhydroperoxide results in increased expression of HMOX1 mRNA]	13	0.00148625	2.78757e-05
5	Pertussis Toxin inhibits the reaction [ginsenoside Rb1 results in increased expression of HMOX1 mRNA]	13	0.00148625	2.78757e-05
5	oxidized-L-alpha-1-palmitoyl-2-arachidonoyl-sn-glycero-3-phosphorylcholine promotes the reaction [Vehicle Emissions affects the expression of HMOX1 mRNA]	13	0.00148625	2.78757e-05
5	oxidized-L-alpha-1-palmitoyl-2-arachidonoyl-sn-glycero-3-phosphorylcholine promotes the reaction [Particulate Matter affects the expression of HMOX1 mRNA]	13	0.00148625	2.78757e-05
5	ochratoxin A inhibits the reaction [15-deoxy-delta(12,14)-prostaglandin J2 results in increased expression of HMOX1 mRNA]	13	0.00148625	2.78757e-05
5	Nitroprusside promotes the reaction [S-Nitrosoglutathione results in increased expression of HMOX1 mRNA]	13	0.00148625	2.78757e-05
5	nickel chloride promotes the reaction [lipopolysaccharide, E. coli O26-B6 results in increased expression of HMOX1 mRNA]	13	0.00148625	2.78757e-05
5	NFE2L2 protein affects the reaction [Silver results in increased expression of HMOX1 mRNA]	13	0.00148625	2.78757e-05
5	NFE2L2 mutant form inhibits the reaction [Silver analog results in increased expression of HMOX1 mRNA]	13	0.00148625	2.78757e-05
5	NFE2L2 mutant form inhibits the reaction [Curcumin analog results in increased expression of HMOX1 mRNA]	13	0.00148625	2.78757e-05
5	NFE2L2 mutant form inhibits the reaction [2-tert-butylhydroquinone results in increased expression of HMOX1 mRNA]	13	0.00148625	2.78757e-05
5	NFE2L2 mRNA affects the reaction [plumbagin results in increased expression of HMOX1 mRNA]	13	0.00148625	2.78757e-05
5	NFE2L2 gene inhibits the reaction [Vehicle Emissions analog results in increased expression of HMOX1 mRNA]	13	0.00148625	2.78757e-05
5	NFE2L2 gene inhibits the reaction [Particulate Matter results in increased expression of HMOX1 mRNA]	13	0.00148625	2.78757e-05
5	MST1R protein affects the reaction [Acetaminophen results in increased expression of HMOX1 mRNA]	13	0.00148625	2.78757e-05
5	motexafin gadolinium promotes the reaction [Zinc Acetate results in increased expression of HMOX1 mRNA]	13	0.00148625	2.78757e-05
5	monascin inhibits the reaction [S100B protein results in decreased expression of HMOX1 mRNA]	13	0.00148625	2.78757e-05
5	Mangifera indica extract promotes the reaction [TNF protein results in increased expression of HMOX1 mRNA]	13	0.00148625	2.78757e-05
5	lucidone inhibits the reaction [Ethanol results in decreased expression of HMOX1 mRNA]	13	0.00148625	2.78757e-05
5	IL9	13	0.00148625	2.78757e-05
5	IL1B protein promotes the reaction [Ammonia results in increased expression of HMOX1 mRNA]	13	0.00148625	2.78757e-05
5	IFNG protein inhibits the reaction [Hemin results in increased expression of HMOX1 mRNA]	13	0.00148625	2.78757e-05
5	Hydrogen Peroxide promotes the reaction [TP53 protein results in increased expression of HMOX1 mRNA]	13	0.00148625	2.78757e-05
5	HSF1 protein inhibits the reaction [sodium arsenite results in increased expression of HMOX1 mRNA]	13	0.00148625	2.78757e-05
5	Hemin promotes the reaction [Paraquat results in increased expression of HMOX1 mRNA]	13	0.00148625	2.78757e-05
5	Glutathione inhibits the reaction [Raloxifene results in increased expression of HMOX1 mRNA]	13	0.00148625	2.78757e-05
5	Glucose promotes the reaction [tin mesoporphyrin results in increased expression of HMOX1 mRNA]	13	0.00148625	2.78757e-05
5	Glucosamine inhibits the reaction [IL1B results in decreased expression of HMOX1 mRNA]	13	0.00148625	2.78757e-05
5	EM703 inhibits the reaction [Vehicle Emissions results in increased expression of HMOX1 mRNA]	13	0.00148625	2.78757e-05
5	[Eicosapentaenoic Acid co-treated with procyanidin B3] promotes the reaction [Lipopolysaccharides results in increased expression of HMOX1 mRNA]	13	0.00148625	2.78757e-05
5	Dietary Fats promotes the reaction [arsenite results in increased expression of HMOX1 mRNA]	13	0.00148625	2.78757e-05
5	Diazoxide inhibits the reaction [Oxygen deficiency results in decreased expression of HMOX1 mRNA]	13	0.00148625	2.78757e-05
5	Deferoxamine inhibits the reaction [Cadmium Chloride results in increased expression of HMOX1 mRNA]	13	0.00148625	2.78757e-05
5	darinaparsin inhibits the reaction [[SMARCA4 protein binds to HMOX1 promoter] results in increased expression of HMOX1 mRNA]	13	0.00148625	2.78757e-05
5	Dactinomycin inhibits the reaction [resveratrol results in increased expression of HMOX1 mRNA]	13	0.00148625	2.78757e-05
5	Dactinomycin inhibits the reaction [Nitroprusside results in increased expression of HMOX1 mRNA]	13	0.00148625	2.78757e-05
5	Dactinomycin inhibits the reaction [Lipid Peroxides results in increased expression of HMOX1 mRNA]	13	0.00148625	2.78757e-05
5	Cycloheximide promotes the reaction [3-O-caffeoyl-1-methylquinic acid results in increased expression of HMOX1 mRNA]	13	0.00148625	2.78757e-05
5	Curcumin promotes the reaction [malondialdehyde-low density lipoprotein, human results in increased expression of HMOX1 mRNA]	13	0.00148625	2.78757e-05
5	Cobalt promotes the reaction [[Lipopolysaccharides co-treated with IFNG protein] results in increased expression of HMOX1 mRNA]	13	0.00148625	2.78757e-05
5	cobaltous chloride inhibits the reaction [Oxygen deficiency results in increased expression of HMOX1 mRNA]	13	0.00148625	2.78757e-05
5	cobaltiprotoporphyrin affects the reaction [BACH1 protein affects the expression of HMOX1 mRNA]	13	0.00148625	2.78757e-05
5	CAT protein promotes the reaction [1,2-naphthoquinone results in increased expression of HMOX1 mRNA]	13	0.00148625	2.78757e-05
5	CAT protein inhibits the reaction [Plant Extracts results in increased expression of HMOX1 mRNA]	13	0.00148625	2.78757e-05
5	CAT protein inhibits the reaction [Bisphenol A-Glycidyl Methacrylate results in increased expression of HMOX1 mRNA]	13	0.00148625	2.78757e-05
5	Buthionine Sulfoximine promotes the reaction [Ticlopidine results in increased expression of HMOX1 mRNA]	13	0.00148625	2.78757e-05
5	Buthionine Sulfoximine promotes the reaction [Diclofenac results in increased expression of HMOX1 mRNA]	13	0.00148625	2.78757e-05
5	Buthionine Sulfoximine promotes the reaction [cupric oxide results in increased expression of HMOX1 mRNA]	13	0.00148625	2.78757e-05
5	Buthionine Sulfoximine promotes the reaction [Butylated Hydroxyanisole results in increased expression of HMOX1 mRNA]	13	0.00148625	2.78757e-05
5	[Buthionine Sulfoximine co-treated with Ascorbic Acid] promotes the reaction [Copper Sulfate results in increased expression of HMOX1 mRNA]	13	0.00148625	2.78757e-05
5	astaxanthine promotes the reaction [1-Methyl-4-phenylpyridinium results in increased expression of HMOX1 mRNA]	13	0.00148625	2.78757e-05
5	Ascorbic Acid inhibits the reaction [Cadmium results in increased expression of HMOX1 mRNA]	13	0.00148625	2.78757e-05
5	ARNT affects the reaction [cobaltous chloride results in increased expression of HMOX1 mRNA]	13	0.00148625	2.78757e-05
5	anthra(1,9-cd)pyrazol-6(2H)-one inhibits the reaction [Potassium Dichromate results in increased expression of HMOX1 mRNA]	13	0.00148625	2.78757e-05
5	anthra(1,9-cd)pyrazol-6(2H)-one inhibits the reaction [Copper results in increased expression of HMOX1 mRNA]	13	0.00148625	2.78757e-05
5	Acetylcysteine inhibits the reaction [Zinc results in increased expression of HMOX1 mRNA]	13	0.00148625	2.78757e-05
5	Acetylcysteine inhibits the reaction [Toluene results in increased expression of HMOX1 mRNA]	13	0.00148625	2.78757e-05
5	Acetylcysteine inhibits the reaction [Silicon analog results in increased expression of HMOX1 mRNA]	13	0.00148625	2.78757e-05
5	Acetylcysteine inhibits the reaction [nickel chloride results in increased expression of HMOX1 mRNA]	13	0.00148625	2.78757e-05
5	Acetylcysteine inhibits the reaction [Hypochlorous Acid results in increased expression of HMOX1 mRNA]	13	0.00148625	2.78757e-05
5	Acetylcysteine inhibits the reaction [gallium nitrate results in increased expression of HMOX1 mRNA]	13	0.00148625	2.78757e-05
5	Acetylcysteine inhibits the reaction [Ethacrynic Acid results in increased expression of HMOX1 mRNA]	13	0.00148625	2.78757e-05
5	Acetylcysteine inhibits the reaction [elesclomol results in increased expression of HMOX1 mRNA]	13	0.00148625	2.78757e-05
5	Acetylcysteine inhibits the reaction [Dinitrochlorobenzene results in increased expression of HMOX1 mRNA]	13	0.00148625	2.78757e-05
5	Acetylcysteine inhibits the reaction [Capsaicin results in increased expression of HMOX1 mRNA]	13	0.00148625	2.78757e-05
5	Acetylcysteine inhibits the reaction [Benzene results in increased expression of HMOX1 mRNA]	13	0.00148625	2.78757e-05
5	Acetylcysteine inhibits the reaction [2-xylene results in increased expression of HMOX1 mRNA]	13	0.00148625	2.78757e-05
5	abexinostat promotes the reaction [bortezomib results in increased expression of HMOX1 mRNA]	13	0.00148625	2.78757e-05
5	4-aminobenzhydrazide inhibits the reaction [hydroxyhydroquinone results in increased expression of HMOX1 mRNA]	13	0.00148625	2.78757e-05
5	2-(4-morpholinyl)-8-phenyl-4H-1-benzopyran-4-one inhibits the reaction [Simvastatin results in increased expression of HMOX1 mRNA]	13	0.00148625	2.78757e-05
5	2-(4-morpholinyl)-8-phenyl-4H-1-benzopyran-4-one inhibits the reaction [Lansoprazole results in increased expression of HMOX1 mRNA]	13	0.00148625	2.78757e-05
5	1-aminobenzotriazole inhibits the reaction [[Ticlopidine co-treated with Buthionine Sulfoximine] results in increased expression of HMOX1 mRNA]	13	0.00148625	2.78757e-05
5	1-aminobenzotriazole inhibits the reaction [[Diclofenac co-treated with Buthionine Sulfoximine] results in increased expression of HMOX1 mRNA]	13	0.00148625	2.78757e-05
5	1-aminobenzotriazole inhibits the reaction [[Butylated Hydroxyanisole co-treated with Buthionine Sulfoximine] results in increased expression of HMOX1 mRNA]	13	0.00148625	2.78757e-05
5	1-aminobenzotriazole inhibits the reaction [[Acetaminophen co-treated with Buthionine Sulfoximine] results in increased expression of HMOX1 mRNA]	13	0.00148625	2.78757e-05
5	1,10-phenanthroline inhibits the reaction [Oxygen results in increased expression of HMOX1 mRNA]	13	0.00148625	2.78757e-05
6	Gastrin-CREB signalling pathway via PKC and MAPK	24	0.00162921	2.78757e-05
9	DARPP-32 events	66	0.001647	2.78757e-05
26	Antigen activates B Cell Receptor (BCR) leading to generation of second messengers	417	0.00171088	2.78757e-05
12	Thyrotropin-releasing hormone receptor signaling pathway	119	0.00178489	2.78757e-05
13	HATs acetylate histones	138	0.00180475	2.78757e-05
5	triptolide inhibits the reaction [Asbestos, Crocidolite results in decreased phosphorylation of MAPK14 protein]	14	0.0018515	2.78757e-05
5	SOD1 protein promotes the reaction [Asbestos, Crocidolite results in increased phosphorylation of MAPK14 protein]	14	0.0018515	2.78757e-05
5	SB 203580 inhibits the reaction [Methotrexate results in increased phosphorylation of MAPK14 protein]	14	0.0018515	2.78757e-05
5	SB 203580 inhibits the reaction [Homocysteine results in increased phosphorylation of MAPK14 protein]	14	0.0018515	2.78757e-05
5	SB 203580 inhibits the reaction [FGF2 protein results in increased phosphorylation of MAPK14 protein]	14	0.0018515	2.78757e-05
5	SB 203580 inhibits the reaction [dracorhodin analog results in increased phosphorylation of MAPK14 protein]	14	0.0018515	2.78757e-05
5	SB 203580 inhibits the reaction [cinnamic aldehyde results in increased phosphorylation of MAPK14 protein]	14	0.0018515	2.78757e-05
5	SB 203580 inhibits the reaction [Cadmium results in increased phosphorylation of MAPK14 protein]	14	0.0018515	2.78757e-05
5	SB 203580 inhibits the reaction [benzo(k)fluoranthene results in increased phosphorylation of MAPK14 protein]	14	0.0018515	2.78757e-05
5	SB 203580 inhibits the reaction [Acrolein results in increased phosphorylation of MAPK14 protein]	14	0.0018515	2.78757e-05
5	resveratrol inhibits the reaction [4-hydroxy-2-nonenal results in increased phosphorylation of MAPK14 protein]	14	0.0018515	2.78757e-05
5	Omeprazole inhibits the reaction [N-Formylmethionine Leucyl-Phenylalanine results in increased phosphorylation of MAPK14 protein]	14	0.0018515	2.78757e-05
5	NFKBIA protein inhibits the reaction [titanium dioxide results in increased phosphorylation of MAPK14 protein]	14	0.0018515	2.78757e-05
5	NFKBIA protein inhibits the reaction [Silver results in increased phosphorylation of MAPK14 protein]	14	0.0018515	2.78757e-05
5	NFKBIA protein inhibits the reaction [Fullerenes analog results in increased phosphorylation of MAPK14 protein]	14	0.0018515	2.78757e-05
5	NFKBIA protein inhibits the reaction [[cadmium selenide co-treated with zinc sulfide] results in increased phosphorylation of MAPK14 protein]	14	0.0018515	2.78757e-05
5	[MAP2K4 co-treated with MAP2K7] affects the reaction [Cadmium Chloride results in increased phosphorylation of MAPK14 protein]	14	0.0018515	2.78757e-05
5	Intracellular Signalling Through FSH Receptor and Follicle Stimulating Hormone	14	0.0018515	2.78757e-05
5	IL1A promotes the reaction [Aspirin results in increased phosphorylation of MAPK14 protein]	14	0.0018515	2.78757e-05
5	Glucosamine inhibits the reaction [IL1B results in increased phosphorylation of MAPK14 protein]	14	0.0018515	2.78757e-05
5	Emodin promotes the reaction [arsenic trioxide results in increased phosphorylation of MAPK14 protein]	14	0.0018515	2.78757e-05
5	Dexamethasone inhibits the reaction [Lipopolysaccharides results in increased phosphorylation of MAPK14 protein]	14	0.0018515	2.78757e-05
5	Curcumin inhibits the reaction [[TNF protein co-treated with IL1B protein] results in increased phosphorylation of MAPK14 protein]	14	0.0018515	2.78757e-05
5	Capsaicin inhibits the reaction [Palmitic Acid results in increased phosphorylation of MAPK14 protein]	14	0.0018515	2.78757e-05
5	bisindolylmaleimide I inhibits the reaction [Fenretinide results in increased phosphorylation of MAPK14 protein]	14	0.0018515	2.78757e-05
5	Aspirin promotes the reaction [IL1A results in increased phosphorylation of MAPK14 protein]	14	0.0018515	2.78757e-05
5	Acetylcysteine inhibits the reaction [TNF protein results in increased phosphorylation of MAPK14 protein]	14	0.0018515	2.78757e-05
5	Acetylcysteine inhibits the reaction [indeno(1,2,3-cd)pyrene results in increased phosphorylation of MAPK14 protein]	14	0.0018515	2.78757e-05
5	Acetylcysteine inhibits the reaction [Hydrogen Peroxide results in increased phosphorylation of MAPK14 protein]	14	0.0018515	2.78757e-05
5	Acetylcysteine inhibits the reaction [benz(a)anthracene results in increased phosphorylation of MAPK14 protein]	14	0.0018515	2.78757e-05
5	Acetylcysteine inhibits the reaction [[arsenic trioxide co-treated with phytosphingosine] results in increased phosphorylation of MAPK14 protein]	14	0.0018515	2.78757e-05
6	Insulin effects increased synthesis of Xylulose-5-Phosphate	25	0.00189432	2.78757e-05
6	amb2 Integrin signaling	25	0.00189432	2.78757e-05
13	Synthesis of IP3 and IP4 in the cytosol	140	0.00199884	2.78757e-05
22	VEGFR2 mediated cell proliferation	331	0.00202269	2.78757e-05
4	TP53 protein promotes the reaction [Fluorouracil results in decreased expression of MYC mRNA]	6	0.00210334	2.78757e-05
4	TNFR1 signaling pathway ( TNFR1 signaling pathway )	6	0.00210334	2.78757e-05
4	Thiophenes analog promotes the reaction [Tretinoin results in decreased expression of MYC mRNA]	6	0.00210334	2.78757e-05
4	Tetradecanoylphorbol Acetate promotes the reaction [Mitoxantrone results in decreased expression of MYC mRNA]	6	0.00210334	2.78757e-05
4	Sodium Selenite inhibits the reaction [Asbestos, Serpentine results in increased expression of MYC mRNA]	6	0.00210334	2.78757e-05
4	SMARCA4 protein affects the reaction [Promegestone results in increased expression of MYC mRNA]	6	0.00210334	2.78757e-05
4	pyrrolidine dithiocarbamic acid inhibits the reaction [resveratrol results in increased expression of MYC mRNA]	6	0.00210334	2.78757e-05
4	Phosphorylation of Emi1	6	0.00210334	2.78757e-05
4	phenylalanyl-prolyl-arginine methyl chloride inhibits the reaction [F2 protein results in increased expression of MYC mRNA]	6	0.00210334	2.78757e-05
4	Niclosamide inhibits the reaction [TNF protein results in increased expression of MYC mRNA]	6	0.00210334	2.78757e-05
4	methylselenic acid inhibits the reaction [afimoxifene results in increased expression of MYC mRNA]	6	0.00210334	2.78757e-05
4	Glucose affects the reaction [Dexamethasone results in increased expression of MYC mRNA]	6	0.00210334	2.78757e-05
4	GH1 protein promotes the reaction [arsenic trioxide results in increased expression of MYC mRNA]	6	0.00210334	2.78757e-05
4	fulvestrant inhibits the reaction [Diarylheptanoids results in increased expression of MYC mRNA]	6	0.00210334	2.78757e-05
4	fulvestrant inhibits the reaction [1,7-diphenyl-5-heptene-3-one results in increased expression of MYC mRNA]	6	0.00210334	2.78757e-05
4	ESR2 protein affects the reaction [[Coumestrol co-treated with ESR1 protein] results in increased expression of MYC mRNA]	6	0.00210334	2.78757e-05
4	BRCA1 protein affects the reaction [Tamoxifen results in decreased expression of MYC mRNA]	6	0.00210334	2.78757e-05
4	bicyclol inhibits the reaction [Tetradecanoylphorbol Acetate results in increased expression of MYC mRNA]	6	0.00210334	2.78757e-05
4	BCL2 protein inhibits the reaction [arsenic trioxide results in decreased expression of MYC mRNA]	6	0.00210334	2.78757e-05
4	[bathocuproine sulfonate co-treated with pyrrolidine dithiocarbamic acid] inhibits the reaction [[Tetradecanoylphorbol Acetate co-treated with Ionomycin] results in increased expression of MYC mRNA]	6	0.00210334	2.78757e-05
4	afimoxifene inhibits the reaction [Estrogens results in increased expression of MYC mRNA]	6	0.00210334	2.78757e-05
4	4-fluorobenzoyl-TN-14003 inhibits the reaction [Estradiol results in increased expression of MYC mRNA]	6	0.00210334	2.78757e-05
4	2-(2-amino-3-methoxyphenyl)-4H-1-benzopyran-4-one inhibits the reaction [Cadmium Chloride results in increased expression of MYC mRNA]	6	0.00210334	2.78757e-05
7	Zinc deficiency promotes the reaction [Dopamine results in increased cleavage of PARP1 protein]	39	0.00216301	4.25046e-05
7	Zinc affects the reaction [chromium hexavalent ion results in increased cleavage of PARP1 protein]	39	0.00216301	4.25046e-05
7	WRN protein inhibits the reaction [hydroquinone results in increased cleavage of PARP1 protein]	39	0.00216301	4.25046e-05
7	wortmannin promotes the reaction [Etoposide results in increased cleavage of PARP1 protein]	39	0.00216301	4.25046e-05
7	U 0126 promotes the reaction [Flavanones results in increased cleavage of PARP1 protein]	39	0.00216301	4.25046e-05
7	U 0126 inhibits the reaction [BPDE-II results in increased cleavage of PARP1 protein]	39	0.00216301	4.25046e-05
7	TYMP inhibits the reaction [Nocodazole results in increased cleavage of PARP1 protein]	39	0.00216301	4.25046e-05
7	troglitazone promotes the reaction [Aspirin results in increased cleavage of PARP1 protein]	39	0.00216301	4.25046e-05
7	TP53 mutant form inhibits the reaction [nutlin 3 results in increased cleavage of PARP1 protein]	39	0.00216301	4.25046e-05
7	TP53 mutant form inhibits the reaction [goniothalamin results in increased cleavage of PARP1 protein]	39	0.00216301	4.25046e-05
7	TP53 mutant form inhibits the reaction [arsenite results in increased cleavage of PARP1 protein]	39	0.00216301	4.25046e-05
7	TP53 mutant form inhibits the reaction [(6-(4-(2-piperidin-1-ylethoxy)phenyl))-3-pyridin-4-ylpyrazolo(1,5-a)pyrimidine results in increased cleavage of PARP1 protein]	39	0.00216301	4.25046e-05
7	TNFSF10 protein promotes the reaction [celecoxib results in increased cleavage of PARP1 protein]	39	0.00216301	4.25046e-05
7	TNFSF10 protein promotes the reaction [bortezomib results in increased cleavage of PARP1 protein]	39	0.00216301	4.25046e-05
7	TNFRSF10A protein promotes the reaction [[TNFSF10 protein co-treated with tripterine] results in increased cleavage of PARP1 protein]	39	0.00216301	4.25046e-05
7	TH protein inhibits the reaction [Hydrogen Peroxide results in increased cleavage of PARP1 protein]	39	0.00216301	4.25046e-05
7	Sirolimus inhibits the reaction [Ethanol results in increased cleavage of PARP1 protein]	39	0.00216301	4.25046e-05
7	salvin inhibits the reaction [Oxidopamine results in increased cleavage of PARP1 protein]	39	0.00216301	4.25046e-05
7	resveratrol inhibits the reaction [IL1B protein results in increased cleavage of PARP1 protein]	39	0.00216301	4.25046e-05
7	RBL2 protein inhibits the reaction [Camptothecin results in increased cleavage of PARP1 protein]	39	0.00216301	4.25046e-05
7	quinoline-val-asp(OMe)-CH2-OPH inhibits the reaction [epoxomicin results in increased cleavage of PARP1 protein]	39	0.00216301	4.25046e-05
7	PTGS2 mutant form promotes the reaction [baohuoside I results in increased cleavage of PARP1 protein]	39	0.00216301	4.25046e-05
7	PTGDS mutant form promotes the reaction [Paraquat results in increased cleavage of PARP1 protein]	39	0.00216301	4.25046e-05
7	PTEN protein inhibits the reaction [6-bromo-8-ethoxy-3-nitro-2H-chromene results in increased cleavage of PARP1 protein]	39	0.00216301	4.25046e-05
7	Potassium Dichromate inhibits the reaction [nickel sulfate results in increased cleavage of PARP1 protein]	39	0.00216301	4.25046e-05
7	PLD2 protein inhibits the reaction [Dactinomycin results in increased cleavage of PARP1 protein]	39	0.00216301	4.25046e-05
7	pifithrin inhibits the reaction [silybin results in increased cleavage of PARP1 protein]	39	0.00216301	4.25046e-05
7	pifithrin inhibits the reaction [[decitabine co-treated with Busulfan] results in increased cleavage of PARP1 protein]	39	0.00216301	4.25046e-05
7	pepstatin inhibits the reaction [Glucosamine results in increased cleavage of PARP1 protein]	39	0.00216301	4.25046e-05
7	PD 169316 inhibits the reaction [docetaxel results in increased cleavage of PARP1 protein]	39	0.00216301	4.25046e-05
7	Ouabain promotes the reaction [Mitomycin results in increased cleavage of PARP1 protein]	39	0.00216301	4.25046e-05
7	Niflumic Acid promotes the reaction [ciglitazone results in increased cleavage of PARP1 protein]	39	0.00216301	4.25046e-05
7	nickel sulfate inhibits the reaction [Potassium Dichromate results in increased cleavage of PARP1 protein]	39	0.00216301	4.25046e-05
7	N-ethoxymethyl-3-amino-1,2,4-benzotriazine-1,4-dioxide promotes the reaction [Oxygen deficiency results in increased cleavage of PARP1 protein]	39	0.00216301	4.25046e-05
7	Mitomycin promotes the reaction [Ouabain results in increased cleavage of PARP1 protein]	39	0.00216301	4.25046e-05
7	Mevalonic Acid inhibits the reaction [Simvastatin results in increased cleavage of PARP1 protein]	39	0.00216301	4.25046e-05
7	Melitten inhibits the reaction [TGFB1 protein results in increased cleavage of PARP1 protein]	39	0.00216301	4.25046e-05
7	MAP3K5 protein affects the reaction [Paclitaxel results in increased cleavage of PARP1 protein]	39	0.00216301	4.25046e-05
7	KNK 437 promotes the reaction [arsenic trioxide results in increased cleavage of PARP1 protein]	39	0.00216301	4.25046e-05
7	ITPK1 mutant form promotes the reaction [[Cycloheximide co-treated with TNF protein] results in increased cleavage of PARP1 protein]	39	0.00216301	4.25046e-05
7	ITPK1 inhibits the reaction [[Cycloheximide co-treated with TNF] results in increased cleavage of PARP1 protein]	39	0.00216301	4.25046e-05
7	Indomethacin promotes the reaction [LTA protein results in increased cleavage of PARP1 protein]	39	0.00216301	4.25046e-05
7	HSPA5 protein inhibits the reaction [methylselenic acid results in increased cleavage of PARP1 protein]	39	0.00216301	4.25046e-05
7	GW 501516 promotes the reaction [Indomethacin results in increased cleavage of PARP1 protein]	39	0.00216301	4.25046e-05
7	GW0742 promotes the reaction [sulindac sulfide results in increased cleavage of PARP1 protein]	39	0.00216301	4.25046e-05
7	GSTA1 protein inhibits the reaction [Doxorubicin results in increased cleavage of PARP1 protein]	39	0.00216301	4.25046e-05
7	Glutathione deficiency promotes the reaction [antimony trioxide results in increased cleavage of PARP1 protein]	39	0.00216301	4.25046e-05
7	gefitinib affects the reaction [oxaliplatin results in increased cleavage of PARP1 protein]	39	0.00216301	4.25046e-05
7	FADD mutant form inhibits the reaction [Aminolevulinic Acid analog results in increased cleavage of PARP1 protein]	39	0.00216301	4.25046e-05
7	evodiamine promotes the reaction [TNF protein results in increased cleavage of PARP1 protein]	39	0.00216301	4.25046e-05
7	Etoposide promotes the reaction [CASP3 protein results in increased cleavage of PARP1 protein]	39	0.00216301	4.25046e-05
7	epigallocatechin gallate inhibits the reaction [potassium chromate(VI) results in increased cleavage of PARP1 protein]	39	0.00216301	4.25046e-05
7	Egtazic Acid inhibits the reaction [Cadmium Chloride results in increased cleavage of PARP1 protein]	39	0.00216301	4.25046e-05
7	Dopamine promotes the reaction [Zinc deficiency results in increased cleavage of PARP1 protein]	39	0.00216301	4.25046e-05
7	Dexamethasone promotes the reaction [2-(1H-indazol-4-yl)-6-(4-methanesulfonylpiperazin-1-ylmethyl)-4-morpholin-4-ylthieno(3,2-d)pyrimidine results in increased cleavage of PARP1 protein]	39	0.00216301	4.25046e-05
7	Dactinomycin promotes the reaction [TNF results in increased cleavage of PARP1 protein]	39	0.00216301	4.25046e-05
7	cobaltiprotoporphyrin inhibits the reaction [FASLG protein results in increased cleavage of PARP1 protein]	39	0.00216301	4.25046e-05
7	ciglitazone promotes the reaction [Niflumic Acid results in increased cleavage of PARP1 protein]	39	0.00216301	4.25046e-05
7	celecoxib promotes the reaction [tetracycline CMT-3 results in increased cleavage of PARP1 protein]	39	0.00216301	4.25046e-05
7	celecoxib inhibits the reaction [Fluorouracil results in increased cleavage of PARP1 protein]	39	0.00216301	4.25046e-05
7	CDKN1A protein inhibits the reaction [atorvastatin results in increased cleavage of PARP1 protein]	39	0.00216301	4.25046e-05
7	Capsaicin promotes the reaction [TNFSF10 results in increased cleavage of PARP1 protein]	39	0.00216301	4.25046e-05
7	CALM1 protein promotes the reaction [Mustard Gas results in increased cleavage of PARP1 protein]	39	0.00216301	4.25046e-05
7	bortezomib promotes the reaction [TNFSF10 protein results in increased cleavage of PARP1 protein]	39	0.00216301	4.25046e-05
7	bortezomib promotes the reaction [romidepsin results in increased cleavage of PARP1 protein]	39	0.00216301	4.25046e-05
7	bortezomib promotes the reaction [gambogic acid results in increased cleavage of PARP1 protein]	39	0.00216301	4.25046e-05
7	bortezomib promotes the reaction [belinostat results in increased cleavage of PARP1 protein]	39	0.00216301	4.25046e-05
7	BLVRA protein inhibits the reaction [sodium arsenite results in increased cleavage of PARP1 protein]	39	0.00216301	4.25046e-05
7	bisindolylmaleimide I inhibits the reaction [Cyclosporine results in increased cleavage of PARP1 protein]	39	0.00216301	4.25046e-05
7	benzyloxycarbonyl-valyl-alanyl-aspartic acid inhibits the reaction [[Verapamil co-treated with gambogic acid] results in increased cleavage of PARP1 protein]	39	0.00216301	4.25046e-05
7	benzyloxycarbonyl-valyl-alanyl-aspartic acid inhibits the reaction [gemcitabine results in increased cleavage of PARP1 protein]	39	0.00216301	4.25046e-05
7	benzyloxycarbonyl-valyl-alanyl-aspartic acid analog inhibits the reaction [[Cisplatin co-treated with chrysin] results in increased cleavage of PARP1 protein]	39	0.00216301	4.25046e-05
7	benzyloxycarbonyl-leucyl-glutamyl-histidyl-aspartic acid fluoromethyl ketone inhibits the reaction [isoliquiritigenin results in increased cleavage of PARP1 protein]	39	0.00216301	4.25046e-05
7	benzyloxycarbonyl-isoleucyl-glutamyl-threonyl-aspartic acid fluoromethyl ketone inhibits the reaction [Ursodeoxycholic Acid results in increased cleavage of PARP1 protein]	39	0.00216301	4.25046e-05
7	benzyloxycarbonyl-isoleucyl-glutamyl-threonyl-aspartic acid fluoromethyl ketone inhibits the reaction [N,N-dimethylphytosphingosine results in increased cleavage of PARP1 protein]	39	0.00216301	4.25046e-05
7	BCL2 protein inhibits the reaction [vorinostat results in increased cleavage of PARP1 protein]	39	0.00216301	4.25046e-05
7	BCL2 protein inhibits the reaction [ropivacaine results in increased cleavage of PARP1 protein]	39	0.00216301	4.25046e-05
7	BCL2 protein inhibits the reaction [resveratrol results in increased cleavage of PARP1 protein]	39	0.00216301	4.25046e-05
7	BCL2 protein inhibits the reaction [mafosfamide results in increased cleavage of PARP1 protein]	39	0.00216301	4.25046e-05
7	BCL2 protein inhibits the reaction [alvocidib results in increased cleavage of PARP1 protein]	39	0.00216301	4.25046e-05
7	BCL2 inhibits the reaction [Cisplatin results in increased cleavage of PARP1 protein]	39	0.00216301	4.25046e-05
7	bafilomycin A promotes the reaction [BO-1012 results in increased cleavage of PARP1 protein]	39	0.00216301	4.25046e-05
7	ATF3 mutant form inhibits the reaction [O(2)-(2,4-dinitrophenyl) 1-((4-ethoxycarbonyl)piperazin-1-yl)diazen-1-ium-1,2-diolate results in increased cleavage of PARP1 protein]	39	0.00216301	4.25046e-05
7	Aspirin promotes the reaction [troglitazone results in increased cleavage of PARP1 protein]	39	0.00216301	4.25046e-05
7	Aspirin inhibits the reaction [Deoxycholic Acid results in increased cleavage of PARP1 protein]	39	0.00216301	4.25046e-05
7	aspartyl-glutamyl-valyl-aspartal inhibits the reaction [Rotenone results in increased cleavage of PARP1 protein]	39	0.00216301	4.25046e-05
7	arsenic trioxide promotes the reaction [zoledronic acid results in increased cleavage of PARP1 protein]	39	0.00216301	4.25046e-05
7	anthra(1,9-cd)pyrazol-6(2H)-one inhibits the reaction [[Sulindac co-treated with arsenic trioxide] results in increased cleavage of PARP1 protein]	39	0.00216301	4.25046e-05
7	anthra(1,9-cd)pyrazol-6(2H)-one inhibits the reaction [dehydroxymethylepoxyquinomicin results in increased cleavage of PARP1 protein]	39	0.00216301	4.25046e-05
7	AM 251 inhibits the reaction [HU 211 results in increased cleavage of PARP1 protein]	39	0.00216301	4.25046e-05
7	alpha-Tocopherol inhibits the reaction [Tamoxifen results in increased cleavage of PARP1 protein]	39	0.00216301	4.25046e-05
7	AKT1 protein inhibits the reaction [[bortezomib co-treated with TNFSF10 protein] results in increased cleavage of PARP1 protein]	39	0.00216301	4.25046e-05
7	AKT1 protein inhibits the reaction [[bortezomib co-treated with sorafenib] results in increased cleavage of PARP1 protein]	39	0.00216301	4.25046e-05
7	Acetylcysteine inhibits the reaction [Tosylphenylalanyl Chloromethyl Ketone results in increased cleavage of PARP1 protein]	39	0.00216301	4.25046e-05
7	Acetylcysteine inhibits the reaction [[TNFSF10 protein co-treated with gingerol] results in increased cleavage of PARP1 protein]	39	0.00216301	4.25046e-05
7	Acetylcysteine inhibits the reaction [shogaol results in increased cleavage of PARP1 protein]	39	0.00216301	4.25046e-05
7	Acetylcysteine inhibits the reaction [shikonin results in increased cleavage of PARP1 protein]	39	0.00216301	4.25046e-05
7	Acetylcysteine inhibits the reaction [2'-benzoyloxycinnamaldehyde results in increased cleavage of PARP1 protein]	39	0.00216301	4.25046e-05
7	Acetylcysteine affects the reaction [[gambogic acid affects the reaction [ABCB1 protein affects the susceptibility to Doxorubicin]] affects the cleavage of PARP1 protein]	39	0.00216301	4.25046e-05
7	3-methyladenine promotes the reaction [fosbretabulin results in increased cleavage of PARP1 protein]	39	0.00216301	4.25046e-05
7	3-methyladenine inhibits the reaction [Oligopeptides analog results in increased cleavage of PARP1 protein]	39	0.00216301	4.25046e-05
7	3-methyladenine inhibits the reaction [Morpholines analog results in increased cleavage of PARP1 protein]	39	0.00216301	4.25046e-05
7	3-methyladenine inhibits the reaction [divinyl sulfone analog results in increased cleavage of PARP1 protein]	39	0.00216301	4.25046e-05
7	3-aminobenzamide promotes the reaction [Capsaicin results in increased cleavage of PARP1 protein]	39	0.00216301	4.25046e-05
7	3,4,5,3',4'-pentachlorobiphenyl inhibits the reaction [Benzo(a)pyrene results in increased cleavage of PARP1 protein]	39	0.00216301	4.25046e-05
7	2-(2-amino-3-methoxyphenyl)-4H-1-benzopyran-4-one inhibits the reaction [[LM-1685 co-treated with carboxyamido-triazole] results in increased cleavage of PARP1 protein]	39	0.00216301	4.25046e-05
7	2-(2-amino-3-methoxyphenyl)-4H-1-benzopyran-4-one inhibits the reaction [Fenretinide results in increased cleavage of PARP1 protein]	39	0.00216301	4.25046e-05
7	2-(2-amino-3-methoxyphenyl)-4H-1-benzopyran-4-one inhibits the reaction [benzo(a)pyrene 7,8-dihydrodiol results in increased cleavage of PARP1 protein]	39	0.00216301	4.25046e-05
7	2-(1H-indazol-4-yl)-6-(4-methanesulfonylpiperazin-1-ylmethyl)-4-morpholin-4-ylthieno(3,2-d)pyrimidine promotes the reaction [GDC-0973 results in increased cleavage of PARP1 protein]	39	0.00216301	4.25046e-05
7	1,2-bis(2-aminophenoxy)ethane N,N,N',N'-tetraacetic acid acetoxymethyl ester inhibits the reaction [Arachidonic Acid results in increased cleavage of PARP1 protein]	39	0.00216301	4.25046e-05
6	HSF1 activation	26	0.00218845	4.25046e-05
6	Adrenaline,noradrenaline inhibits insulin secretion	26	0.00218845	4.25046e-05
9	[N3-cyclopropyl-7-((4-(1-methylethyl)phenyl)methyl)-7H-pyrrolo(3, 2-f)quinazoline-1,3-diamine binds to F2R protein] promotes the reaction [CGB protein results in increased chemical synthesis of Progesterone]	70	0.00225889	4.25046e-05
9	N-(2-(4-bromocinnamylamino)ethyl)-5-isoquinolinesulfonamide inhibits the reaction [[FSHB protein co-treated with Testosterone] results in increased chemical synthesis of Progesterone]	70	0.00225889	4.25046e-05
9	LEP protein inhibits the reaction [8-Bromo Cyclic Adenosine Monophosphate results in increased chemical synthesis of Progesterone]	70	0.00225889	4.25046e-05
9	GSTA3 protein affects the reaction [Colforsin results in increased chemical synthesis of Progesterone]	70	0.00225889	4.25046e-05
9	[6,7-dimethyl-2-(2E)-3-(1-methyl-2-phenyl-1H-pyrrolo(2,3-b)pyridin-3-yl-prop-2-enoyl)-1,2,3,4-tetrahydroisoquinoline hydrochloride results in decreased activity of SMAD3 protein] inhibits the reaction [FSHB protein results in increased chemical synthesis of Progesterone]	70	0.00225889	4.25046e-05
5	Sumoylation by RanBP2 regulates transcriptional repression	15	0.00227233	4.25046e-05
5	S1P5 pathway	15	0.00227233	4.25046e-05
5	Gli processing signaling ( Hedgehog signaling pathway )	15	0.00227233	4.25046e-05
5	Cyclin A:Cdk2-associated events at S phase entry	15	0.00227233	4.25046e-05
10	De novo purine biosynthesis	88	0.00242298	4.25046e-05
8	UMP Synthase Deiciency (Orotic Aciduria)	55	0.00244897	4.25046e-05
8	MNGIE (Mitochondrial Neurogastrointestinal Encephalopathy)	55	0.00244897	4.25046e-05
8	Dihydropyrimidinase Deficiency	55	0.00244897	4.25046e-05
8	Degradation of GLI1 by the proteasome	55	0.00244897	4.25046e-05
8	Beta Ureidopropionase Deficiency	55	0.00244897	4.25046e-05
12	Metabotropic glutamate receptor group I pathway	125	0.00247593	4.25046e-05
6	IL5	27	0.00251314	4.25046e-05
6	Glycerol Phosphate Shuttle	27	0.00251314	4.25046e-05
17	Separation of Sister Chromatids	228	0.00259259	4.25046e-05
9	Uptake and function of anthrax toxins	72	0.00262213	4.25046e-05
9	Role of second messengers in netrin-1 signaling	72	0.00262213	4.25046e-05
9	RMTs methylate histone arginines	72	0.00262213	4.25046e-05
7	BMAL1:CLOCK,NPAS2 activates circadian gene expression	41	0.00267717	4.25046e-05
5	Intracellular Signalling Through Histamine H2 Receptor and Histamine	16	0.00275212	4.25046e-05
6	HIF-2-alpha transcription factor network	28	0.0028699	4.25046e-05
4	Signal attenuation	7	0.0029113	4.25046e-05
4	resveratrol inhibits the reaction [CYP1B1 protein affects the chemical synthesis of 4-hydroxyestradiol]	7	0.0029113	4.25046e-05
4	IkBA variant leads to EDA-ID	7	0.0029113	4.25046e-05
9	Sema4D induced cell migration and growth-cone collapse	74	0.00302712	4.25046e-05
6	Signaling events mediated by HDAC Class III	29	0.00326018	4.25046e-05
5	[tyrphostin AG 1478 results in decreased activity of EGFR protein] inhibits the reaction [FSHB protein results in increased chemical synthesis of Hyaluronic Acid]	17	0.00329399	4.25046e-05
5	ERK cascade ( FGF8 signaling (Xenopus) )	17	0.00329399	4.25046e-05
5	ERK cascade ( FGF8 signaling (Mouse) )	17	0.00329399	4.25046e-05
5	Degradation of beta catenin	17	0.00329399	4.25046e-05
7	Validated transcriptional targets of deltaNp63 isoforms	44	0.00360427	4.25046e-05
7	SUMOylation of RNA binding proteins	44	0.00360427	4.25046e-05
6	CREB phosphorylation through the activation of CaMKII	30	0.00368537	4.25046e-05
16	purine nucleotides de novo biosynthesis	217	0.00379208	4.25046e-05
4	zerumbone inhibits the reaction [TNF protein results in increased degradation of NFKBIA protein]	8	0.00387851	4.25046e-05
4	wortmannin inhibits the reaction [Etoposide results in increased degradation of NFKBIA protein]	8	0.00387851	4.25046e-05
4	Thrombin signalling through proteinase activated receptors (PARs)	8	0.00387851	4.25046e-05
4	Thalidomide inhibits the reaction [TGFB1 protein results in increased degradation of NFKBIA protein]	8	0.00387851	4.25046e-05
4	Tetradecanoylphorbol Acetate promotes the reaction [Cycloheximide results in increased degradation of NFKBIA protein]	8	0.00387851	4.25046e-05
4	SIRT4 protein inhibits the reaction [Smoke analog results in increased degradation of NFKBIA protein]	8	0.00387851	4.25046e-05
4	Simvastatin inhibits the reaction [TNF results in increased degradation of NFKBIA protein]	8	0.00387851	4.25046e-05
4	Rutin inhibits the reaction [Glucose results in increased degradation of NFKBIA protein]	8	0.00387851	4.25046e-05
4	Quercetin inhibits the reaction [[Tetradecanoylphorbol Acetate co-treated with Calcimycin] results in increased degradation of NFKBIA protein]	8	0.00387851	4.25046e-05
4	Plant Extracts inhibits the reaction [Hydrogen Peroxide results in increased degradation of NFKBIA protein]	8	0.00387851	4.25046e-05
4	NFKB1 mutant form inhibits the reaction [Mustard Gas results in increased degradation of NFKBIA protein]	8	0.00387851	4.25046e-05
4	Luteolin inhibits the reaction [chromium hexavalent ion results in increased degradation of NFKBIA protein]	8	0.00387851	4.25046e-05
4	lucidone inhibits the reaction [2,2'-azobis(2-amidinopropane) results in increased degradation of NFKBIA protein]	8	0.00387851	4.25046e-05
4	lipopolysaccharide, E coli O55-B5 inhibits the reaction [deoxynivalenol results in increased degradation of NFKBIA protein]	8	0.00387851	4.25046e-05
4	JNK cascade ( TNFR1 signaling pathway )	8	0.00387851	4.25046e-05
4	IL4 protein inhibits the reaction [Acetaldehyde results in increased degradation of NFKBIA protein]	8	0.00387851	4.25046e-05
4	IKK activation signaling (through PKC beta and CARMA1:BCL10:MALT1) ( B cell receptor signaling )	8	0.00387851	4.25046e-05
4	IKBKB gene inhibits the reaction [Doxorubicin results in increased degradation of NFKBIA protein]	8	0.00387851	4.25046e-05
4	[Hydrogen Peroxide results in increased cleavage of NFKBIA protein]	8	0.00387851	4.25046e-05
4	[Hydrogen Peroxide results in increased activity of MAPK3 protein]	8	0.00387851	4.25046e-05
4	[Hydrogen Peroxide results in increased activity of MAPK1 protein]	8	0.00387851	4.25046e-05
4	[Hydrogen Peroxide results in increased activity of ALOX5 protein]	8	0.00387851	4.25046e-05
4	Fenofibrate inhibits the reaction [ALB protein results in increased degradation of NFKBIA protein]	8	0.00387851	4.25046e-05
4	EGF protein inhibits the reaction [NVP-TAE684 results in decreased phosphorylation of ALK protein]	8	0.00387851	4.25046e-05
4	E 3330 promotes the reaction [lead acetate results in increased oxidation of MAPK3 protein]	8	0.00387851	4.25046e-05
4	E 3330 promotes the reaction [lead acetate results in increased oxidation of MAPK1 protein]	8	0.00387851	4.25046e-05
4	E 3330 promotes the reaction [Hydrogen Peroxide results in increased oxidation of MAPK3 protein]	8	0.00387851	4.25046e-05
4	E 3330 promotes the reaction [Hydrogen Peroxide results in increased oxidation of MAPK1 protein]	8	0.00387851	4.25046e-05
4	dihydroartemisinin inhibits the reaction [Tetradecanoylphorbol Acetate results in increased degradation of NFKBIA protein]	8	0.00387851	4.25046e-05
4	Dexamethasone inhibits the reaction [bortezomib results in increased degradation of NFKBIA protein]	8	0.00387851	4.25046e-05
4	Curcumin inhibits the reaction [Smoke results in decreased activity of HDAC2 protein]	8	0.00387851	4.25046e-05
4	Curcumin inhibits the reaction [Hydrogen Peroxide results in decreased activity of HDAC2 protein]	8	0.00387851	4.25046e-05
4	Copper inhibits the reaction [N,N,N',N'-tetrakis(2-pyridylmethyl)ethylenediamine results in increased degradation of NFKBIA protein]	8	0.00387851	4.25046e-05
4	chrysin inhibits the reaction [[Calcimycin co-treated with Tetradecanoylphorbol Acetate] results in increased degradation of NFKBIA protein]	8	0.00387851	4.25046e-05
4	capsiate analog inhibits the reaction [[Tetradecanoylphorbol Acetate co-treated with Plant Preparations] results in increased degradation of NFKBIA protein]	8	0.00387851	4.25046e-05
4	Calcitriol inhibits the reaction [IL1B protein results in increased degradation of NFKBIA protein]	8	0.00387851	4.25046e-05
4	benzyloxycarbonylleucyl-leucyl-leucine aldehyde inhibits the reaction [[Tetradecanoylphorbol Acetate co-treated with Ionomycin] results in increased degradation of NFKBIA protein]	8	0.00387851	4.25046e-05
4	benzyloxycarbonylleucyl-leucyl-leucine aldehyde inhibits the reaction [Lipopolysaccharides results in increased degradation of NFKBIA protein]	8	0.00387851	4.25046e-05
4	BAY 11-7085 inhibits the reaction [nickel sulfate results in increased degradation of NFKBIA protein]	8	0.00387851	4.25046e-05
4	arsenite inhibits the reaction [TNF protein affects the degradation of NFKBIA protein]	8	0.00387851	4.25046e-05
4	ALK protein inhibits the reaction [crizotinib results in decreased phosphorylation of ALK protein]	8	0.00387851	4.25046e-05
4	ALK gene inhibits the reaction [2,4-diaminopyrimidine analog results in decreased phosphorylation of ALK protein]	8	0.00387851	4.25046e-05
4	acetylleucyl-leucyl-norleucinal inhibits the reaction [4-(3-(1-adamantyl)-4-hydroxyphenyl)-3-chlorocinnamic acid results in increased degradation of NFKBIA protein]	8	0.00387851	4.25046e-05
4	Acetylcysteine inhibits the reaction [Hydrogen Peroxide results in increased activity of FOS protein]	8	0.00387851	4.25046e-05
4	8-(4-chloro-phenylthio)-2'-O-methyladenosine-3'-5'-cyclic monophosphate inhibits the reaction [Tobacco Smoke Pollution analog results in increased degradation of NFKBIA protein]	8	0.00387851	4.25046e-05
4	4-((3-bromophenyl)amino)-6,7-dimethoxyquinazoline inhibits the reaction [vanadyl sulfate results in increased degradation of NFKBIA protein]	8	0.00387851	4.25046e-05
4	3-(4-methylphenylsulfonyl)-2-propenenitrile inhibits the reaction [S100B protein results in increased degradation of NFKBIA protein]	8	0.00387851	4.25046e-05
4	1-hydroxy-2-naphthoic acid analog inhibits the reaction [lipopolysaccharide, E coli O55-B5 results in increased degradation of NFKBIA protein]	8	0.00387851	4.25046e-05
5	NRIF signals cell death from the nucleus	18	0.00390083	4.25046e-05
5	Intracellular Signalling Through Adenosine Receptor A2b and Adenosine	18	0.00390083	4.25046e-05
5	Intracellular Signalling Through Adenosine Receptor A2a and Adenosine	18	0.00390083	4.25046e-05
5	activated TAK1 mediates p38 MAPK activation	18	0.00390083	4.25046e-05
6	Zinc Sulfate inhibits the reaction [prolinedithiocarbamate results in increased phosphorylation of TP53 protein]	31	0.00414682	4.25046e-05
6	XDH protein promotes the reaction [[Raloxifene results in decreased expression of NOS2 protein] results in decreased chemical synthesis of Nitric Oxide]	31	0.00414682	4.25046e-05
6	wortmannin inhibits the reaction [Asbestos, Serpentine results in increased phosphorylation of TP53 protein]	31	0.00414682	4.25046e-05
6	wortmannin inhibits the reaction [3,3'-diindolylmethane results in increased phosphorylation of TP53 protein]	31	0.00414682	4.25046e-05
6	wortmannin inhibits the reaction [2-chloroethyl ethyl sulfide results in increased phosphorylation of TP53 protein]	31	0.00414682	4.25046e-05
6	Vitamin E inhibits the reaction [Benzo(a)pyrene results in increased phosphorylation of TP53 protein]	31	0.00414682	4.25046e-05
6	ubiquinol-10 biosynthesis	31	0.00414682	4.25046e-05
6	U 0126 inhibits the reaction [[Cisplatin co-treated with chrysin] results in increased phosphorylation of TP53 protein]	31	0.00414682	4.25046e-05
6	[[TNF protein co-treated with IFNG protein] affects the expression of NOS2 mRNA] promotes the reaction [NOS2 protein results in increased chemical synthesis of Nitric Oxide]	31	0.00414682	4.25046e-05
6	Tetrachlorodibenzodioxin inhibits the reaction [Etoposide results in increased phosphorylation of TP53 protein]	31	0.00414682	4.25046e-05
6	sorafenib promotes the reaction [GSK3B protein results in increased phosphorylation of TP53 protein]	31	0.00414682	4.25046e-05
6	SB 203580 inhibits the reaction [[sodium arsenite co-treated with Vitamin K 3] results in increased phosphorylation of TP53 protein]	31	0.00414682	4.25046e-05
6	SB 203580 inhibits the reaction [[Cisplatin co-treated with fisetin] results in increased phosphorylation of TP53 protein]	31	0.00414682	4.25046e-05
6	Rotenone inhibits the reaction [[IL1B protein results in increased expression of NOS2 protein] results in increased chemical synthesis of Nitric Oxide]	31	0.00414682	4.25046e-05
6	resveratrol promotes the reaction [Ceramides results in increased phosphorylation of TP53 protein]	31	0.00414682	4.25046e-05
6	resveratrol promotes the reaction [Bleomycin results in increased phosphorylation of TP53 protein]	31	0.00414682	4.25046e-05
6	resveratrol inhibits the reaction [[Hydrogen Peroxide results in decreased activity of NOS3 protein] results in decreased chemical synthesis of Nitric Oxide]	31	0.00414682	4.25046e-05
6	RELA protein inhibits the reaction [arsenite results in increased phosphorylation of TP53 protein]	31	0.00414682	4.25046e-05
6	pifithrin inhibits the reaction [KITLG protein results in increased phosphorylation of TP53 protein]	31	0.00414682	4.25046e-05
6	pifithrin inhibits the reaction [[KITLG protein co-treated with EDN1 protein] results in increased phosphorylation of TP53 protein]	31	0.00414682	4.25046e-05
6	pifithrin inhibits the reaction [goniothalamin results in increased phosphorylation of TP53 protein]	31	0.00414682	4.25046e-05
6	PI3 kinase pathway	31	0.00414682	4.25046e-05
6	Pentetic Acid inhibits the reaction [pyrithione zinc results in increased phosphorylation of TP53 protein]	31	0.00414682	4.25046e-05
6	Paraquat promotes the reaction [Trientine results in increased phosphorylation of TP53 protein]	31	0.00414682	4.25046e-05
6	nickel sulfate inhibits the reaction [Potassium Dichromate results in increased phosphorylation of TP53 protein]	31	0.00414682	4.25046e-05
6	NFKBIA protein affects the reaction [Lipopolysaccharides results in increased chemical synthesis of Nitric Oxide]	31	0.00414682	4.25046e-05
6	Naloxone inhibits the reaction [Morphine results in increased phosphorylation of TP53 protein]	31	0.00414682	4.25046e-05
6	MIR630 mRNA inhibits the reaction [Cisplatin results in increased phosphorylation of TP53 protein]	31	0.00414682	4.25046e-05
6	Melitten inhibits the reaction [[Nitroprusside results in increased expression of NOS2 protein] results in increased chemical synthesis of Nitric Oxide]	31	0.00414682	4.25046e-05
6	LEP protein affects the reaction [IL1B protein results in increased chemical synthesis of Nitric Oxide]	31	0.00414682	4.25046e-05
6	Integrin alphaIIb beta3 signaling	31	0.00414682	4.25046e-05
6	icariin promotes the reaction [NOS3 protein results in increased chemical synthesis of Nitric Oxide]	31	0.00414682	4.25046e-05
6	HSPA9 protein inhibits the reaction [sodium arsenite results in increased phosphorylation of TP53 protein]	31	0.00414682	4.25046e-05
6	hesperetin inhibits the reaction [Hydrogen Peroxide results in increased phosphorylation of TP53 protein]	31	0.00414682	4.25046e-05
6	ethyl N-allyl-N-(2-methyl-3-(4-(4-amidinophenoxycarbonyl)phenyl)propenoyl)aminoacetate methanesulfonate inhibits the reaction [[Lipopolysaccharides results in increased expression of NOS2 protein] results in increased chemical synthesis of Nitric Oxide]	31	0.00414682	4.25046e-05
6	decitabine promotes the reaction [ATR protein results in increased phosphorylation of TP53 protein]	31	0.00414682	4.25046e-05
6	CSF1 protein promotes the reaction [IFNG protein results in increased chemical synthesis of Nitric Oxide]	31	0.00414682	4.25046e-05
6	Carbamates analog promotes the reaction [ATM protein results in increased phosphorylation of TP53 protein]	31	0.00414682	4.25046e-05
6	candesartan inhibits the reaction [AGT protein results in increased chemical synthesis of Nitric Oxide]	31	0.00414682	4.25046e-05
6	Caffeine inhibits the reaction [spermine nitric oxide complex results in increased phosphorylation of TP53 protein]	31	0.00414682	4.25046e-05
6	Caffeine inhibits the reaction [silybin results in increased phosphorylation of TP53 protein]	31	0.00414682	4.25046e-05
[truncated: 6,071 more rows]
