# Supplementary material for: Epigenetic profiling of human brain differential DNA methylation networks in schizophrenia
Source: BMC Med Genomics. 2016 Dec 5;9(Suppl 3):68. doi: 10.1186/s12920-016-0229-y (PMC5260790; doi:10.1186/s12920-016-0229-y)
Supplement: Additional file 4: — The protein complexes involved in SDMGs and SCZCGs. (XLSX 27 kb) [file 12920_2016_229_MOESM4_ESM.xlsx]

## Sheet: complexes in SDMGs , SCZCGs
Matched genes	Complex name	Total genes	P-value	FDR_adjust
30	Nop56p-associated pre-rRNA complex	104	1.32977e-08	1.77906e-08
26	Ribosome; cytoplasmic	81	2.5073e-08	1.77126e-07
22	40S ribosomal subunit; cytoplasmic	65	1.67177e-07	1.77126e-07
20	Respiratory chain complex I (holoenzyme); mitochondrial	55	2.75e-07	5.05461e-05
15	60S ribosomal subunit; cytoplasmic	47	3.59317e-05	0.000588955
21	TFTC complex (TATA-binding protein-free TAF-II-containing complex)	114	0.000451398	0.00119818
8	PCAF complex	20	0.0014428	0.00119818
6	AKAP250-PKA-PDE4D complex	10	0.00214186	0.00188186
6	Kinase maturation complex 1	16	0.00952435	0.00188186
8	17S U2 snRNP	33	0.0121649	0.00188186
7	TRBP containing complex (DICER; RPL7A; EIF6; MOV10 and subunits of the 60S ribosomal particle)	25	0.0124236	0.00188186
13	C complex spliceosome	80	0.0125156	0.00188186
5	Respiratory chain complex I (incomplete intermediate); mitochondrial	11	0.013381	0.00188186
6	SNW1 complex	18	0.013686	0.00188186
4	VEGF transcriptional complex	6	0.0172435	0.00188186
4	SMRT core complex	6	0.0172435	0.00188186
18	Spliceosome	142	0.0195612	0.00188186
12	Mediator complex	78	0.0213898	0.00188186
12	55S ribosome; mitochondrial	78	0.0213898	0.00188186
9	39S ribosomal subunit; mitochondrial	48	0.0219277	0.00188186
4	PCNA complex	7	0.0229624	0.00188186
7	F1F0-ATP synthase (EC 3.6.3.14); mitochondrial	30	0.0231361	0.00188186
5	AP3-BLOC1 complex	15	0.0286896	0.00188186
6	TRAP complex	24	0.0316931	0.00188186
6	BRAFT complex	24	0.0316931	0.00188186
5	CF IIAm complex (Cleavage factor IIAm complex)	16	0.0334294	0.00188186
6	STAGA complex (SPT3-TAF9-GCN5 acetyltransferase complex)	25	0.0354523	0.00188186
6	Polycomb repressive complex 1 (PRC1; hPRC-H)	25	0.0354523	0.00188186
3	PLCB3-PARD3-PARD6A complex	3	0.0373441	0.00188186
3	p16-cyclin D2-CDK4 complex	3	0.0373441	0.00188186
7	PA700-20S-PA28 complex	36	0.0408864	0.00188186
5	TLE1 corepressor complex (MASH1 promoter-corepressor complex)	18	0.0438564	0.00188186
9	SMN complex	58	0.0439382	0.00188186
4	Respiratory chain complex I (intermediate VII/650kD); mitochondrial	10	0.0443264	0.00188186
6	DRIP complex	28	0.0478259	0.00188186
7	SMCC complex	39	0.0514232	0.00188186
3	SNARE complex (VAMP2; SNAP25; STX1a; CPLX2)	4	0.0522145	0.00188186
3	SNARE complex (VAMP2; SNAP25; STX1a; CPLX1)	4	0.0522145	0.00188186
3	SMAD3-SMAD4-cJun-cFos complex	4	0.0522145	0.00188186
3	JUND-FOSB-SMAD3-SMAD4 complex	4	0.0522145	0.00188186
3	HSP90-FKBP38-CAM-Ca(2+) complex	4	0.0522145	0.00188186
3	GPI-GnT activity complex	4	0.0522145	0.00188186
3	CyclinD3-CDK4-CDK6-p21 complex	4	0.0522145	0.00188186
3	Cell cycle kinase complex CDK4	4	0.0522145	0.00188186
4	DGCR8 multiprotein complex	11	0.0525876	0.00212379
4	BLOC1-BLOC2 complex	11	0.0525876	0.00212379
5	PA700 complex	20	0.0553565	0.00212379
6	CDC5L complex	30	0.0568432	0.00212379
4	BLM complex II	12	0.0612741	0.00212379
5	Emerin complex 32	22	0.0676731	0.00212379
5	26S proteasome	22	0.0676731	0.00212379
3	SNARE complex (VAMP2; SNAP25; STX1a; CPLX1; CPLX3)	5	0.0681392	0.00212379
5	Emerin complex 52	23	0.0740523	0.00212379
4	SIN3 complex	14	0.0795682	0.00212379
5	RNA polymerase II holoenzyme complex	24	0.0805325	0.00212379
3	WIP-WASp-actin-myosin-IIa complex	6	0.084686	0.00212379
3	Prefoldin complex	6	0.084686	0.00212379
3	Prefoldin	6	0.084686	0.00212379
3	Mis12 centromere complex	6	0.084686	0.00212379
3	DNA ligase III-XRCC1 complex	6	0.084686	0.00212379
6	DNA synthesome complex (17 subunits)	36	0.0860872	0.00212379
5	Respiratory chain complex I (gamma subunit) mitochondrial	25	0.0870791	0.00212379
5	BRCA1-RNA polymerase II complex	26	0.0936581	0.00212379
4	BLOC-1 (biogenesis of lysosome-related organelles complex 1)	16	0.0985179	0.00212379
5	CRSP complex	27	0.100237	0.00212379
3	SNARE complex (VAMP2; SNAP25; STX1a; STX3; CPLX1; CPLX3; CPLX4)	7	0.101492	0.00212379
7	NuA4/Tip60 HAT complex	55	0.113917	0.00212379
3	TNF-alpha/NF-kappa B signaling complex 7	8	0.118254	0.00212379
3	BRCA1-BARD1-BACH1-DNA damage complex II	8	0.118254	0.00212379
5	ARC complex	30	0.119656	0.00212379
4	HCF-1 complex	19	0.126808	0.00212379
4	FA complex (Fanconi anemia complex)	19	0.126808	0.00212379
3	28S ribosomal subunit; mitochondrial	60	0.128117	0.00212379
3	BRAF-RAF1-14-3-3 complex	9	0.134722	0.00212379
3	5S-DNA-TFIIIA-TFIIIC2-TFIIIB subcomplex	9	0.134722	0.00212379
4	Large Drosha complex	20	0.135932	0.00212379
6	Respiratory chain complex I (lambda subunit) mitochondrial	47	0.137823	0.00212379
2	RNA polymerase II complex; chromatin structure modifying	43	0.145098	0.00212379
4	SIN3-SAP25 complex	22	0.153383	0.00212379
3	NK-3-Groucho-HIPK2-SIN3A-RbpA48-HDAC1 complex	11	0.166003	0.00212379
4	Parvulin-associated pre-rRNP complex	62	0.174779	0.00212379
2	PRNP-ApolopoproteinE3 complex	2	0.177027	0.00212379
2	PCNA-p21 complex	2	0.177027	0.00212379
2	p53-SP1 complex	2	0.177027	0.00212379
2	GNA14-p115RhoGEF complex	2	0.177027	0.00212379
2	DJ-1-SNCA complex; high molecular weight complex	2	0.177027	0.00212379
2	CCND2-CDK6 complex	2	0.177027	0.00212379
2	CCND2-CDK4 complex	2	0.177027	0.00212379
2	BLM-TOP3A complex	2	0.177027	0.00212379
6	TFIID complex	63	0.179495	0.00212379
3	RNA polymerase II core complex	12	0.180523	0.00212379
3	P2X7 receptor signalling complex	12	0.180523	0.00212379
3	E2F-6 complex	12	0.180523	0.00212379
3	BCDX2 complex	12	0.180523	0.00212379
5	Respiratory chain complex I (beta subunit) mitochondrial	44	0.187651	0.00212379
3	LSD1 complex	13	0.194156	0.00212379
3	INO80 chromatin remodeling complex	13	0.194156	0.00212379
3	H2AX complex; isolated from cells without IR exposure	13	0.194156	0.00212379
3	DSS1 complex	13	0.194156	0.00212379
3	BRCA1-core RNA polymerase II complex	13	0.194156	0.00212379
4	ALL-1 supercomplex	28	0.196609	0.00212379
3	TNF-alpha/NF-kappa B signaling complex 6	14	0.206828	0.00212379
3	DNA synthesome complex (13 subunits)	14	0.206828	0.00212379
3	CCT:PFD complex; testis specific	14	0.206828	0.00212379
3	CCT:PFD complex	14	0.206828	0.00212379
3	Emerin complex 24	15	0.218492	0.00212379
2	TRPC1-Homer3-IP3R complex	3	0.220011	0.00212379
2	TOP1-PSF-P54 complex	3	0.220011	0.00212379
2	TAJ-NgR1-LINGO-1 signaling complex	3	0.220011	0.00212379
2	STAT3-NLK-MAP3K7 complex	3	0.220011	0.00212379
2	SNARE complex (RINT1; ZW10; p31)	3	0.220011	0.00212379
2	SMAD3-SMAD4-SP1 complex	3	0.220011	0.00212379
2	SMAD3-SMAD4-FOXO4 complex	3	0.220011	0.00212379
2	SMAD3-SMAD4-cJUN complex	3	0.220011	0.00212379
2	SMAD2-SMAD4-FAST1 complex	3	0.220011	0.00212379
2	RNF11-SMURF2-STAMBP complex	3	0.220011	0.00212379
2	RHOA-IP3R-TRPC1 complex	3	0.220011	0.00212379
2	Respiratory chain complex I (intermediate II/230kD); mitochondrial	3	0.220011	0.00212379
2	PLCB1-PARD3-PARD6A complex	3	0.220011	0.00212379
2	PGAM5-KEAP1-NRF2 complex	3	0.220011	0.00212379
2	PAR3-PAR6-PALS1 complex	3	0.220011	0.00212379
2	p54(nrb)-PSF-matrin3 complex	3	0.220011	0.00212379
2	P53-BARD1-Ku70 complex	3	0.220011	0.00212379
2	p34(SEI-1)-CDK4-CyclinD2 complex	3	0.220011	0.00212379
2	N-NOS-CHIP-HSP70-1 complex	3	0.220011	0.00212379
2	NgR-TROY-LINGO1 complex	3	0.220011	0.00212379
2	NFAT-JUN-FOS DNA-protein complex	3	0.220011	0.00212379
2	NCOR-SIN3-HDAC1 complex	3	0.220011	0.00212379
2	MR-UBC9-SRC1 complex	3	0.220011	0.00212379
2	LINGO-1-Nogo-66-p75 signaling complex	3	0.220011	0.00212379
2	ITGB6-FYN-FN1 complex	3	0.220011	0.00212379
2	ITGAV-ITGB6-TGFB3 complex	3	0.220011	0.00212379
2	ITGAV-ITGB6-SPP1 complex	3	0.220011	0.00212379
2	ITGAM-ITGB2-CD11 complex	3	0.220011	0.00212379
2	HSP90-CIP1-FKBPL complex	3	0.220011	0.00212379
2	Heterotrimeric G protein complex (GNG2; GNB1; GNAS)	3	0.220011	0.00212379
2	G protein complex (HDAC4; GNB1; GNG2)	3	0.220011	0.00212379
2	FHL2-p53-HIPK2 complex	3	0.220011	0.00212379
2	ETS2-FOS-JUN complex	3	0.220011	0.00212379
2	ERG-JUN-FOS DNA-protein complex	3	0.220011	0.00212379
2	DNMT1-G9a-PCNA complex	3	0.220011	0.00212379
2	CyclinD3-CDK4-CDK6 complex	3	0.220011	0.00212379
2	CyclinD1-CDK4-p21 complex	3	0.220011	0.00212379
2	CyclinD1-CDK4-CDK6 complex	3	0.220011	0.00212379
2	CRKL-WIPF1-WAS complex	3	0.220011	0.00212379
2	BRCA1 B complex	3	0.220011	0.00212379
2	BRCA1-BARD1-UbcH7c complex	3	0.220011	0.00212379
2	Axin-p53-HIPK2 complex	3	0.220011	0.00212379
2	ARF-Mule complex	3	0.220011	0.00212379
2	Apoptosis- and splicing-associated protein complex (ASAP-S); SAP18-RNPS1-Acinus-S	3	0.220011	0.00212379
2	Apoptosis- and splicing-associated protein complex (ASAP-L); SAP18-RNPS1-Acinus-L	3	0.220011	0.00212379
4	TFIIH transcription factor complex	38	0.230813	0.00212379
3	RNA polymerase II (RNAPII)	17	0.238685	0.00212379
3	CtBP complex	17	0.238685	0.00212379
3	Profilin 2 complex	18	0.247199	0.00212379
2	ZAP70-CRKL-WIPF1-WAS complex	4	0.256341	0.00239422
2	Ubiquitin E3 ligase (SIAH1; SIP; SKP1A; TBL1X)	4	0.256341	0.00239422
2	snRNP-free U1A (SF-A) complex	4	0.256341	0.00239422
2	SNARE complex (RINT1; ZW10; p31; Stx18)	4	0.256341	0.00239422
2	SMAD3-SMAD4-FOXO3-FOXG1 complex	4	0.256341	0.00239422
2	SMAD2-SMAD4-FAST1-TGIF complex; TGF(beta) induced	4	0.256341	0.00239422
2	RB1-TFAP2A complex	4	0.256341	0.00239422
2	RAD51B-RAD51C complex	4	0.256341	0.00239422
2	PAR-6-PAR-3-VE-cadherin complex; endothelial	4	0.256341	0.00239422
2	p53-BCL2 complex	4	0.256341	0.00239422
2	Notch2(N-TM)-Notch2(N-EC)-Delta complex	4	0.256341	0.00239422
2	NCOR-SIN3-RPD3 complex	4	0.256341	0.00239422
2	Mitotic checkpoint complex (MCC)	4	0.256341	0.00239422
2	IRF3-CBP complex	4	0.256341	0.00239422
2	HERP1/HEY2-NCOR-SIN3A complex	4	0.256341	0.00239422
2	hASC-1 complex	4	0.256341	0.00239422
2	GALNS-lysosomal hydrolase 1.27 MDa complex	4	0.256341	0.00239422
2	FYB-CARMA1-BCL-10-MALT1 complex	4	0.256341	0.00239422
2	DSIF complex (DRB sensitivity-inducing factor complex)	4	0.256341	0.00239422
2	DAXX-Axin-p53-HIPK2 complex	4	0.256341	0.00239422
2	Cell cycle kinase complex CDK2	4	0.256341	0.00239422
2	CDC37-HSP90AA1-HSP90AB1-MAP3K11 complex	4	0.256341	0.00239422
2	CDC2-PCNA-CCNB1-GADD45G complex	4	0.256341	0.00239422
2	CASP8-FADD-MALT1-BCL10 complex	4	0.256341	0.00239422
2	BRCA1 C complex	4	0.256341	0.00239422
2	BLM-TRF2 complex	4	0.256341	0.00239422
2	BLM complex III	4	0.256341	0.00239422
3	TFIID-beta complex	35	0.262128	0.00239422
3	SIN3-HDAC-SAP30-ARID4 complex	21	0.266564	0.00239422
2	20S proteasome	28	0.274857	0.00239422
3	ORC complex (origin recognition complex)	24	0.277295	0.00239422
3	18S U11/U12 snRNP	24	0.277295	0.00239422
3	TNF-alpha/NF-kappa B signaling complex 5	25	0.279141	0.00239422
3	FA core complex (Fanconi anemia core complex)	25	0.279141	0.00239422
2	MLL1-WDR5 complex	27	0.284725	0.00239422
2	Ubiquitin E3 ligase (ASB1; TCEB1; TCEB2; CUL5; RNF7)	5	0.286723	1
2	SNARE complex (VAMP2; SNAP25; STX1a; CPLX3; CPLX4)	5	0.286723	1
2	SMRT complex	5	0.286723	1
2	SMAD2-SMAD4-FAST1-TGIF-HDAC1 complex; TGF(beta) induced	5	0.286723	1
2	RNA pol II containing coactivator complex Tat-SF	5	0.286723	1
2	PCNA-RFC2-5 complex	5	0.286723	1
2	MSH2/6-BLM-p53-RAD51 complex	5	0.286723	1
2	IKBKB-CDC37-KIAA1967-HSP90AB1-HSP90AA1 complex	5	0.286723	1
2	Decapping complex	5	0.286723	1
2	Cell cycle kinase complex CDK5	5	0.286723	1
2	MeCP1 complex	26	0.29457	1

## Sheet: complexes in SDMGs
Matched genes	Complex name	Total genes	P-value	FDR_adjust
7	SMCC complex	39	0.000418015	0.00189374
8	Mediator complex	78	0.00234494	0.00189374
9	Nop56p-associated pre-rRNA complex	104	0.00280026	0.0023363
5	CDC5L complex	30	0.00587693	0.0023363
4	CF IIAm complex (Cleavage factor IIAm complex)	16	0.00754717	0.0023363
5	17S U2 snRNP	33	0.00782236	0.0023363
7	55S ribosome; mitochondrial	78	0.00867818	0.0030029
6	SMN complex	58	0.0105669	0.00383623
4	TRAP complex	24	0.01902	0.00383623
4	BRAFT complex	24	0.01902	0.00383623
4	DRIP complex	28	0.0267066	0.00383623
6	C complex spliceosome	80	0.03004	0.00383623
3	Respiratory chain complex I (incomplete intermediate); mitochondrial	11	0.0304515	0.00383623
3	DGCR8 multiprotein complex	11	0.0304515	0.00383623
5	Respiratory chain complex I (holoenzyme); mitochondrial	55	0.0328274	0.00383623
4	DNA synthesome complex (17 subunits)	36	0.0453294	0.00383623
5	TFIID complex	63	0.0461574	0.00383623
4	TFIIH transcription factor complex	38	0.0505398	0.00383623
3	TLE1 corepressor complex (MASH1 promoter-corepressor complex)	18	0.063329	0.00383623
3	SNW1 complex	18	0.063329	0.00383623
2	CCND2-CDK6 complex	2	0.0641926	0.00383623
2	CCND2-CDK4 complex	2	0.0641926	0.00383623
3	FA complex (Fanconi anemia complex)	19	0.0684317	0.00383623
4	60S ribosomal subunit; cytoplasmic	47	0.0758392	0.00383623
4	39S ribosomal subunit; mitochondrial	48	0.0787801	0.00383623
2	TOP1-PSF-P54 complex	3	0.0836766	0.00383623
2	SMAD2-SMAD4-FAST1 complex	3	0.0836766	0.00383623
2	p34(SEI-1)-CDK4-CyclinD2 complex	3	0.0836766	0.00383623
2	p16-cyclin D2-CDK4 complex	3	0.0836766	0.00383623
2	Heterotrimeric G protein complex (GNG2; GNB1; GNAS)	3	0.0836766	0.00383623
2	G protein complex (HDAC4; GNB1; GNG2)	3	0.0836766	0.00383623
2	CyclinD3-CDK4-CDK6 complex	3	0.0836766	0.00383623
2	CyclinD1-CDK4-CDK6 complex	3	0.0836766	0.00383623
3	Emerin complex 32	22	0.0840453	0.00383623
3	RNA polymerase II holoenzyme complex	24	0.0945939	0.00383623
3	TRBP containing complex (DICER; RPL7A; EIF6; MOV10 and subunits of the 60S ribosomal particle)	25	0.0998791	0.00383623
3	FA core complex (Fanconi anemia core complex)	25	0.0998791	0.00383623
2	snRNP-free U1A (SF-A) complex	4	0.102257	0.00461326
2	SMAD3-SMAD4-FOXO3-FOXG1 complex	4	0.102257	0.00461326
2	SMAD2-SMAD4-FAST1-TGIF complex; TGF(beta) induced	4	0.102257	0.00461326
2	Mitotic checkpoint complex (MCC)	4	0.102257	0.00461326
2	GALNS-lysosomal hydrolase 1.27 MDa complex	4	0.102257	0.00461326
2	DSIF complex (DRB sensitivity-inducing factor complex)	4	0.102257	0.00461326
2	CyclinD3-CDK4-CDK6-p21 complex	4	0.102257	0.00461326
2	CASP8-FADD-MALT1-BCL10 complex	4	0.102257	0.00461326
2	BLM-TRF2 complex	4	0.102257	0.00461326
3	BRCA1-RNA polymerase II complex	26	0.105159	0.00503532
2	Ubiquitin E3 ligase (ASB1; TCEB1; TCEB2; CUL5; RNF7)	5	0.119965	0.00503532
2	SMAD2-SMAD4-FAST1-TGIF-HDAC1 complex; TGF(beta) induced	5	0.119965	0.00503532
2	Decapping complex	5	0.119965	0.00503532
6	Spliceosome	142	0.120748	0.00503532
3	ARC complex	30	0.126061	0.00503532
2	VEGFA(165)-KDR-NRP1 complex	6	0.13683	0.00659492
2	SMAD3/4-E2F4/5-p107-DP1 complex	6	0.13683	0.00659492
2	G protein complex (HDAC5; GNB1; GNG2)	6	0.13683	0.00659492
2	G protein complex (CACNA1A; GNB1; GNG2)	6	0.13683	0.00659492
2	FAS-FADD-CASP8 complex	6	0.13683	0.00659492
3	TFIID-beta complex	35	0.151181	0.00659492
2	PCNA complex	7	0.152881	0.00659492
2	60S APC containing complex	7	0.152881	0.00659492
2	GPR56-CD81-Galphaq/11-Gbeta complex	8	0.168145	0.00659492
2	BRCA1-BARD1-BACH1-DNA damage complex II	8	0.168145	0.00659492
2	BP-SMAD complex	8	0.168145	0.00659492
2	BASC (Ab 80) complex (BRCA1-associated genome surveillance complex)	8	0.168145	0.00659492
4	Ribosome; cytoplasmic	81	0.171031	0.00659492
2	5S-DNA-TFIIIA-TFIIIC2-TFIIIB subcomplex	9	0.18265	0.00659492
2	SMN-PolII-RHA complex	10	0.196422	0.00659492
2	RFC complex	10	0.196422	0.00659492
2	RAD17-RFC complex	10	0.196422	0.00659492
2	Multisynthetase complex	11	0.209487	0.00659492
2	PC2 complex	12	0.221869	0.00659492
2	eIF3 complex (EIF3S6; EIF3S5; EIF3S4; EIF3S3; EIF3S6IP; EIF3S2; EIF3S9; EIF3S12; EIF3S10; EIF3S8; EIF3S1; EIF3S7)	12	0.221869	0.00659492
2	BLM complex II	12	0.221869	0.00659492
2	BASC complex (BRCA1-associated genome surveillance complex)	12	0.221869	0.00659492
2	RC complex during S-phase of cell cycle	13	0.233592	0.00659492
2	RC complex during G2/M-phase of cell cycle	13	0.233592	0.00659492
2	LSD1 complex	13	0.233592	0.00659492
2	INO80 chromatin remodeling complex	13	0.233592	0.00659492
2	eIF3 complex (EIF3S6; EIF3S5; EIF3S4; EIF3S3; EIF3S6IP; EIF3S2; EIF3S9; EIF3S12; EIF3S10; EIF3S8; EIF3S1; EIF3S7; PCID1)	13	0.233592	0.00659492
3	28S ribosomal subunit; mitochondrial	60	0.2439	0.00659492
2	WINAC complex	14	0.24468	0.0159569
2	SIN3 complex	14	0.24468	0.0159569
2	DNA synthesome complex (13 subunits)	14	0.24468	0.0159569
2	Exon junction complex	15	0.255154	0.0159569
2	COG complex	16	0.265038	0.0159569
2	Large Drosha complex	20	0.299075	0.0159569
2	SIN3-SAP25 complex	22	0.313067	0.0159569
2	18S U11/U12 snRNP	24	0.325234	0.0159569
2	TNF-alpha/NF-kappa B signaling complex 5	25	0.330676	0.0159569
2	Respiratory chain complex I (gamma subunit) mitochondrial	25	0.330676	0.0159569
2	MeCP1 complex	26	0.335711	0.0159569
2	CRSP complex	27	0.340356	0.0159569
2	ALL-1 supercomplex	28	0.344624	1
2	Respiratory chain complex I (lambda subunit) mitochondrial	47	0.371022	1
